# Supplementary material
Source: publisher figshare collection journal article supplement (https://gsapubs.figshare.com/ndownloader/files/37345525)
Supplement: Supplementary file 1 [file 37345525]

## Sheet: 1-Info
Supplemental Table S1. A selected compilation of previously published dates for the southwest, midcontinent and eastern Canada.
Unpublished Garnet Sm-Nd data and four unpublished monazite ages from the Picuris Mountains, New Mexico, provided by Elizabeth Bollen (personal communication, 2021).
This Supplemental Material accompanies Daniel, C.G., Indares, A., Medaris, L.G., Jr., Aronoff, R., Malone, D., and Schwartz, J., 2023,
Linking the Pinware, Baraboo, and Picuris orogens: Recognition of a trans-Laurentian ca. 1520–1340 Ma orogenic belt, in Whitmeyer, S.J.,
Williams, M.L., Kellett, D.A., and Tikoff, B., eds., Laurentia: Turning Points in the Evolution of a Continent: Geological Society of
America Memoir 220, p. 1–16, https://doi.org/10.1130/2022.1220(11).

## Sheet: Ig Zir EC
				c-concordia; ui-upper intercept						eg-eastern grenvile; cg-central grenville; wg-western grenville
sample #	unit/suite_rock type	domain	Plutonic v Volcanic	method	Age (Ma)	1 sigma +/-	2sig +/-	mineral		Region			Age	±1sig
Groulier, et al., 2018													1492	1.5
PA32	St Simeon group_felsic volcanic	Escoumins Supracrustal Belt	v	ui	1492	1.5	3	zircon		cg			1464	19
PA95A	St Simeon Group_felsic volcanic	Escoumins Supracrustal Belt	v	ui	1464	19	38	zircon		cg			1502	3
PA125A	Tadoussak Intrusive suite_granodiorite	Escoumins Supracrustal Belt	p	ui	1502	3	6	zircon		cg			1497	2.5
													1434	5.5
Augland et al., 2015													1413	6
sample #			Plutonic v Volcanic	method	Age (Ma)	1 sigma +/-	2sig +/-	mineral		Region			1375	1
13-AM-152	Bardoux granite	northern Quebecia	p	ui	1497	2.5	5	zircon		cg			1393	4
13-AM-043	Hulot Complex	northern Quebecia	p	ui	1434	5.5	11	zircon		cg			1384	0.5
13-AM-132	Hulot Complex	northern Quebecia	p	ui	1413	6	12	zircon		cg			1394	5
13-AM-132	Hulot Complex	northern Quebecia	p	ui	1375	1	2	zircon		cg			1360	8.5
13-AM-21	Castoreum Plutonic Suite	northern Quebecia	p	ui	1393	4	8	zircon		cg			1468	3.5
13-AM-124	gabbronorite	northern Quebecia	p	ui	1384	0.5	1	zircon		cg			1468	0
													1382	6
Davis et al., 2015-MERN													1367	3
sample #			Plutonic v Volcanic	method	Age (Ma)	1 sigma +/-	2sig +/-	mineral		Region			1373	5.5
12-TC-5111A	Hulot Complex	northern Quebecia	p	ui	1394	5	10	zircon		cg			1365	1.5
12-AM-0139A	Canyon complex_mangerite	northern Quebecia	p	ui	1360	8.5	17	zircon		cg			1741	16
													1749	3.5
Moukhsil et al. 2015-MERN													1694	26
sample #			Plutonic v Volcanic	method	Age (Ma)	1 sigma +/-	2sig +/-	mineral		Region			1410	8
	Hibbard Plutonic Suite_opdalite		p	ui	1468	3.5	7	zircon		wg			1511	3
	Hibbard Plutonic Suite_granite		p	ui	1468		23	zircon		wg			1461	4
	Lacoste Magmatic Suite_granitic gneiss		p	ui	1382	6	12	zircon		wg			1383	15
													1491	1.5
Moukhsil et al. 2011_MERN													1450	5
sample #			Plutonic v Volcanic	method	Age (Ma)	1 sigma +/-	2sig +/-	mineral		Region			1405	7.5
	Belinda monzodiorite	enveloppe Pentecote Anorthosite	p	ui	1367	3	6	zircon		cg			1386	9
	Lanctot granite	enveloppe Pentecote Anorthosite	p	ui	1373	5.5	11	zircon		cg			1365	1
	Bignell granite	enveloppe Pentecote Anorthosite	p	ui	1365	1.5	3	zircon		cg			1670	2.5
													1662	9.5
Dunning and Indares, 2010													1659	22
sample #			Plutonic v Volcanic	method	Age (Ma)	1 sigma +/-	2sig +/-	mineral		Region			1658	1.5
04-289d	granite dyke	Gagnon terrane	p	ui	1741	16	32	zircon		CG			1645	30
04-251	granite dyke	Gagnon terrane	p	ui	1749	3.5	7	zircon		CG			1642	2
04-277	anorthosite	Island domain	p	ui	1694	26	52	zircon		CG			1637	3.5
04-395z	mafic suite	Canyon domain	p	ui	1410	8	16	zircon		CG			1635	1
													1632	2
Solgadi 2010													1632	2
sample #			Plutonic v Volcanic	method	Age (Ma)	1 sigma +/-	2sig +/-	mineral		Region			1628	12.5
	Petites Bergeronnes granite	Escoumins supracrustal belt	p	ui	1511	3	6	zircon		cg			1626	4
													1575	4
Herbert et al., 2009_MERN													1509	3.5
sample #	Rouvray granite		Plutonic v Volcanic	method	Age (Ma)	1 sigma +/-	2sig +/-	mineral		Region			1507	4
	Mun granite		p	ui	1461	4	8	zircon		wg			1501	1.5
			p	ui	1383	15	30	zircon		wg			1498	4
Moukhsil et al. 2009_MERN													1497	6.5
sample #			Plutonic v Volcanic	method	Age (Ma)	1 sigma +/-	2sig +/-	mineral		Region			1511	6.5
04-AG-1228	qtz-monzonite	Southern Quebecia	p	ui	1491	1.5	3	zircon		cg			1539	8.5
													1523	3
Davis & Nantel, 2008_MERN													1503	5.5
	Lacoste Intrusive suite_diorite gneiss		p	ui	1450	5	10	zircon		wg			1502	4.5
	Lacoste Intrusive suite_monzogranite		p	ui	1405	7.5	15	zircon		wg			1491	3.5
	Lacoste Intrusive suite_tonalite		p	ui	1386	9	18	zircon		wg			1493	5
	Lacoste Intrusive suite_diorite		p	ui	1365	1	2	zircon		wg			1632	4
													1526	7
Gower et al., 2008													1504	4.5
sample #			Plutonic v Volcanic	method	Age (Ma)	1 sigma +/-	2sig +/-	mineral		Region			1500	7
CG98-128b	granitic gneiss	Mealy Mountains suite	p	ui	1670	2.5	5	zircon		eg			1467	22
CG97-80	leuconorite	Pinware Terrane	p	ui	1662	9.5	19	zircon		eg			1466	4
CG97-061	granodioritic gneiss	Pinware Terrane	p	ui	1659	22	44	zircon		eg			1506	6.5
CG98-243	quartz monzonite	Mealy Mountains suite	p	ui	1658	1.5	3	zircon		eg			1391	3.5
CG00-319c	pegmatite infill	Pinware Terrane	p	ui	1645	30	60	zircon		eg			1383	8
CG95-154	monzonite	Mealy Mountains suite	p	c	1642	2	4	zircon		eg			1403	16
CG00-169	granodioritic gneiss	Pinware Terrane	p	ui	1637	3.5	7	zircon		eg			1449	10
CG97-028	monzonite	Mealy Mountains suite	p	c	1635	1	2	zircon		eg			1472	20
CG99-050A	monzonite	Pinware Terrane	p	ui	1632	2	4	zircon		eg			1456	8
CG98-218B	anorthosite	Mealy Mountains suite	p	ui	1632	2	4	zircon		eg			1515	15
CG99-259A	tonalitic gneiss	Pinware Terrane	p	ui	1628	12.5	25	zircon		eg			1510	5
CG98-128a	amphibolite	Mealy Mountains suite	p	ui	1626	4	8	zircon		eg			1503	3
CG00-319C	pegmatite infill	Pinware Terrane	p	ui	1575	4	8	zircon		eg			1497	7.5
CG99-195A	granite	Pinware Terrane	p	ui	1509	3.5	7	zircon		eg			1496	4
CG00-319	granodiorite	pinware Terrane	p	ui	1507	4	8	zircon		eg			1495	1
CG97-220	granite	Pinware Terrane	p	ui	1501	1.5	3	zircon		eg			1378	2
CG97-161A	quartzofeldspathic gneiss	Pinware Terrane	p	ui	1498	4	8	zircon		eg			1371	3.5
CG99-254	granodiorite	Pinware Terrane	p	ui	1497	6.5	13	zircon		eg			1371	1
													1351	3
van Breeman and Corriveau, 2005													1500	2
sample #			Plutonic v Volcanic	method	Age (Ma)	1 sigma +/-	2sig +/-	mineral		Region			1493	1.5
CQA-00-111p	lapillistone	Eastern Wakeham	v	ui	1511	6.5	13	zircon		eg			1643	2.5
CQA-00-111p	lapillistone	Eastern Wakeham	v	ui	1539	8.5	19	zircon		eg			1629	8.5
CQA-00-111p	lapillistone	Eastern Wakeham	v	ui	1523	3	6	zircon		eg			1638	7.5
CQA-00-295A	lapilli tuff	Eastern Wakeham	v	ui	1503	5.5	11	zircon		eg			1628	10.5
CQA-00-295A	lapilli tuff	Eastern Wakeham	v	ui	1502	4.5	9	zircon		eg			1631	7.5
CQA-00-273A	laminated granitic gneiss	Eastern Wakeham		ui	1491	3.5	7	zircon		eg			1648	5.5
CQA-00-105QFP	felsic porphyry	Eastern Wakeham	p	ui	1493	5	10	zircon		eg			1458	2.5
													1444	6
Heaman et al., 2004													1442	4.5
sample #			Plutonic v Volcanic	method	Age (Ma)	1 sigma +/-	2sig +/-	mineral		Region			1453	3
	Brador river granite	Pinware terrane	p	ui	1632	4	8	zircon		eg			1427	8
	Riviere St Paul granite	Pinware terrane	p	ui	1526	7	14	zircon		eg			1457	3
	Riviere St Paul tonalite	Pinware terrane	P	ui	1504	4.5	9	zircon		eg			1637	5
	West St Modeste granire	Pinware terrane	p	ui	1500	7	14	zircon		eg			1650	9
	Diable bay granodiorite	Pinware terrane	p	ui	1467	22	44	zircon		eg			1649	3.5
	Pinware granite	Pinware terrane	p	ui	1466	4	8.4	zircon		eg			1495	3.5
													1501	4.5
Herbert and van Breeman, 2004													1371	3
sample #			Plutonic v Volcanic	method	Age (Ma)	1 sigma +/-	2sig +/-	mineral		Region			1647	3.5
	Saguenay_granite	Southern Quebecia	p	ui	1506	6.5	13	zircon		cg			1644	1
	Cap A l'Est_granite	Southern Quebecia	p	ui	1391	3.5	7	zircon		cg			1645	3.5
	Cyriac_granite	Southern Quebecia	p	ui	1383	8	16	zircon		cg			1662	1.5
													1638	5.5
Indares and Dunning, 2004													1645	2
sample #			Plutonic v Volcanic	method	Age (Ma)	1 sigma +/-	2sig +/-	mineral		Region			1639	1
HJ-41	granite	Northern Quebecia	p	ui	1403	16	32	zircon		cg			1629	1.5
													1684	4
Slagstad 2003													1442	3.5
sample #			Plutonic v Volcanic	method	Age (Ma)	1 sigma +/-	2sig +/-	mineral		Region			1651	2.5
M300617	charnockitic gneiss	Muskoka Domain	p	ui	1449	10	20	zircon		wg			1662	5
M100723-1	granitic gneiss	Muskoka Domain	p	ui	1472	20	40	zircon		wg			1640	3.5
													1490	3
													1479	1
													1472	2
Timmerman et al., 2002													1651	2.5
sample #			Plutonic v Volcanic	method	Age (Ma)	1 sigma +/-	2sig +/-	mineral		Region			1623	3.5
132b	granulite	Muskoka Domain	p	ui	1456	8	16	zircon		wg			1459	11.5
													1530	15
Wodicka et al. 2003-MERN													1426	3
sample #			Plutonic v Volcanic	method	Age (Ma)	1 sigma +/-	2sig +/-	mineral		Region			1456	4
	Boulain granitic gneiss	eastern Wakeham	p	ui	1515	15	30	zircon		eg
	Kataht suite, lac Doré porphyry	eastern Wakeham	p	ui	1510	5	10	zircon		eg
	Lac Porphyre porphyry	eastern Wakeham	p	ui	1503	3	6	zircon		eg
	rapakivi granite	eastern Wakeham	p	ui	1497	7.5	15	zircon		eg
	Aguanish complex granite	Domaine de Natashquan	p	ui	1496	4	8	zircon		eg
	Rivière Olomane porphyry	eastern Wakeham	p	ui	1495	1	2	zircon		eg
	Matamec porphyritic granite	Domaine de Saint-Jean	p	c	1378	2	4	zircon		eg
	Matamec mangerite	Domaine de Saint-Jean	p	ui	1371	3.5	7	zircon		eg
	Matamec granitic gneiss	Domaine de Saint-Jean	p	ui	1371	1	2	zircon		eg
	Matamec gabbronorite	Domaine de Saint-Jean	p	c	1351	3	6	zircon		eg
James et al., 2001
sample #			Plutonic v Volcanic	method	Age (Ma)	1 sigma +/-	2sig +/-	mineral		Region
	quartz monzonite	Mekatina	p	ui	1500	2	4	zircon		eg
	granite	Mekatina	p	ui	1493	1.5	3	zircon		eg
Cox et al., 1998
sample #			Plutonic v Volcanic	method	Age (Ma)	1 sigma +/-	2sig +/-	mineral		Region
LES 1	hornblendite	Tshenukutish terrane	p	ui	1643	2.5	5	zircon		cg
LES 2	troctolite	Tshenukutish terrane	p	ui	1629	8.5	17	zircon		cg
Indares et al., 1998
	granite	Lelukuau terrane	p	ui	1638	7.5	15	zircon		eg
	anorthosite	Lelukuau terrane	p	ui	1628	10.5	21	zircon		eg
	leucogabbro	Lelukuau terrane	p	ui	1631	7.5	15	zircon		eg
	mangerite	Lelukuau terrane	p	ui	1648	5.5	11	zircon		eg
	granite/diorite	Tshenukutish terrane	p	ui	1458	2.5	5	zircon		eg
Nadeau & van Breemen 1998
sample #			Plutonic v Volcanic	method	Age (Ma)	1 sigma +/-	2sig +/-	mineral		Region
	Novar dioritic orthogneiss	Algonquin Domain	p	ui	1444	6	12	zircon		wg
	Mary lake granitic orthogneiss	Algonquin Domain	p	ui	1442	4.5	9	zircon		wg
	Seguin granitic orthogneiss	Muskoka Domain	p	ui	1453	3	6	zircon		wg
	Seguin monzodioritic orthogneiss	Muskoka Domain	p	ui	1427	8	16	zircon		wg
Timmerman et al., 1997
sample #			Plutonic v Volcanic	method	Age (Ma)	1 sigma +/-	2sig +/-	mineral		Region
	felsic orthogneiss	Muskoka Domain			1457	3	6	zircon		wr
Wastenays et al., 1997
sample #			Plutonic v Volcanic	method	Age (Ma)	1 sigma +/-	2sig +/-	mineral		Region
CG93-268A	Banded volcanic rock	Pinware terrane	v	ui	1637	5	10	zircon		eg
CG93-027A	quartz monzonite	Pinware terrane	p	ui	1650	9	18	zircon		eg
VN92-197A	quartz monzonite	Pinware terrane	p	ui	1649	3.5	7	zircon		eg
VN91-233A	granite	Pnware terrane_Upper Paradise River	p	ui	1495	3.5	7	zircon		eg
CG91-072A	granite	Pinware terrane_Upper Paradise River	p	ui	1501	4.5	9	zircon		eg
Corrigan and van Breeman, 1997
sample #			Plutonic v Volcanic	method	Age (Ma)	1 sigma +/-	2sig +/-	mineral		Region
	Tawachiche diorite	Portneuf−St Maurice Domain	p		1371	3	6	zircon		cg
Kamo et al., 1996
sample #			Plutonic v Volcanic	method	Age (Ma)	1 sigma +/-	2sig +/-	mineral		Region
CG92-65C	aplite dyke		p	ui	1647	3.5	7	zircon		eg
CG81-306K,L	layered mafic intrusion		p	ui	1644	1	2	zircon		eg
CG81-429	Cartwright alkali feldsapar granire		p	ui	1645	3.5	7	zircon		eg
CG85-654B,C	Shoal bay microgranite		p	ui	1662	1.5	3	zircon		eg
CG85-148B,C	Sand Hill River microgranite		p	ui	1638	5.5	11	zircon		eg
CG85-528A	Bull Island mafic flow		v	ui	1645	2	4	zircon		eg
CG85-280	Paradise Arm Pluton		p	ui	1639	1	2	zircon		eg
VN84-222A	White bear Arm complex		p	ui	1629	1.5	3	zircon		eg
Corrigan et al., 1994
sample #			Plutonic v Volcanic	method	Age (Ma)	1 sigma +/-	2sig +/-	mineral		Region
	Key Harbour granite	Britt Domain	P	ui	1684	4	8	zircon		wg
	Mann Island granodiorie	Britt Domain	P	ui	1442	3.5	7	zircon		wg
Krogh et al., 1994
sample #			Plutonic v Volcanic	method	Age (Ma)	1 sigma +/-	2sig +/-	mineral		Region
			p		1651	2.5	5	zircon		wg
			p		1662	5	10	zircon		wg
Tucker and Gower, 1994
CG87-445B	Cape Charles_quartzofeldspathic enclave	Pinware Terrane	p	ui	1640	3.5	7	zircon		wg
CG87-445B	Cape Charles monzonite	Pinware Terrane	p	ui	1490	3	5	zircon		wg
CG87-426A	St Peter Bay granite	Pinware Terrane	p	ui	1479	1	2	zircon		wg
CG87-469	Wolf Cove quartz monzonite	Pinware Terrane	p	ui	1472	2	3	zircon		wg
Connely et al., 1993
	granite	Lac Joseph terrane	p	ui	1651	2.5	5	zircon		cg
	gabbronorite	Lac Joseph terrane	p	ui	1623	3.5	7			cg
	Shabogamau gabbro	Lac Joseph terrane	p	ui	1459	11.5	23	zircon		cg
Gower et al., 1991
sample #			Plutonic v Volcanic	method	Age (Ma)	1 sigma +/-	2sig +/-	mineral		Region
CG86-698	Riviere Bujeault quartz-syenite	Pinware Terrane	p	ui	1530	15	30	zircon		eg
Schärer et al., 1986
	Michael gabbro		p	ui	1426	3	6			eg
van Breemen et al. 1986
sample #			Plutonic v Volcanic	method	Age (Ma)	1 sigma +/-	2sig +/-	mineral		Region
	monzonite	Britt Domain	p	ui	1456	4	8	zircon		wg

## Sheet: Ig Zircon MC
du Bray et al., 2021 St Francois Mountains, Table 7
sample #	core v outcrop	Plutonic v Volcanic	method	Age (Ma)	1 sigma +/-	2sig +/-	mineral		State				Age	±1sig
63W20	c	p	76	1275	6.5	13	zircon		MO				1275	6.5
CT-5	c	p	76	1278	5	10	zircon		MO				1278	5
82MO-8	c	p	76	1290	7.5	15	zircon		MO				1290	7.5
GVG-1-13	o	p	76	1311	6.5	13	zircon		MO				1311	6.5
FED3	c	p	CA	1317	4	8	zircon		MO				1317	4
124-14A	c	p	76	1338	5	10	zircon		MO				1338	5
CLT-1-13	o	v	low inter	1380	13.5	27	zircon		MO				1380	13.5
MO14-053	o	v	76	1460	8.5	17	zircon		MO				1460	8.5
MO14-043	o	v	76	1473	4.5	9	zircon		MO				1473	4.5
RGR-1-13	o	v	CA	1459	2	4	zircon		MO				1459	2
MO15-008	o	v	76	1466	4	8	zircon		MO				1466	4
BTG-1-13	o	p	76	1453	5.5	11	zircon		MO				1453	5.5
BHG-1-13	o	p	76	1453	4	8	zircon		MO				1453	4
GMI-2-13	o	v	76	1460	3	6	zircon		MO				1460	3
SMG-1-13	o	p	CA	1461	4	8	zircon		MO				1461	4
STG-1-13	o	p	CA	1462	3.5	7	zircon		MO				1462	3.5
KLG-1-13	o	p	CA	1463	3.5	7	zircon		MO				1463	3.5
MO17-013	o	p	CA	1465	4.5	9	zircon		MO				1465	4.5
RE060	c	p	CA	1465	2.5	5	zircon		MO				1465	2.5
RE037	c	p	CA	1457	3.5	7	zircon		MO				1457	3.5
MO17-002	o	p	76	1448	6	12	zircon		MO				1448	6
MR-3-1556	c	v	76	1456	4.5	9	zircon		MO				1456	4.5
SV-5	c	p	76	1458	3.5	7	zircon		MO				1458	3.5
VB-23-2153	c	p	76	1455	5.5	11	zircon		MO				1455	5.5
MO17-001	o	dike	CA	1456	4	8	zircon		MO				1456	4
PcF-076	o	v	76	1463	4.5	9	zircon		MO				1463	4.5
M-DT-3-1	c	p	76	1464	4	8	zircon		MO				1464	4
PcF-077	o	v	76	1465	3	6	zircon		MO				1465	3
PcF-075	o	p	76	1465	3	6	zircon		MO				1465	3
WY032	c	p	76	1468	5	10	zircon		MO				1468	5
W-6-2578	c	p	76	1467	4	8	zircon		MO				1467	4
RE05	c	p	76	1469	3.5	7	zircon		MO				1469	3.5
MH-1	c	p	76	1471	2.5	5	zircon		MO				1471	2.5
GMI-1-13	o	v	76	1471	2.5	5	zircon		MO				1471	2.5
MO17-006	o	p	76	1472	4	8	zircon		MO				1472	4
OZ-5	c	v	76	1479	2	4	zircon		MO				1479	2
M-FK-1-1	c	p	76	1484	3.5	7	zircon		MO				1484	3.5
MO14-007	o	v	CA	1464	3	6	zircon		MO				1464	3
MO14-009	o	v	CA	1463	2.5	5	zircon		MO				1463	2.5
MO14-003	o	v	CA	1462	3	6	zircon		MO				1462	3
SV-3	c	p	CA	1467	3.5	7	zircon		MO				1467	3.5
MO13-006	o	v	76	1463	1	2	zircon		MO				1463	1
USA-50	c	v	76	1470	5	10	zircon		MO				1470	5
J22-1541-1562	c	v	76	1477	8.5	17	zircon		MO				1477	8.5
S5	c	p	76	1471	4	8	zircon		MO				1471	4
S5-gr	c	dike	76	1322	5	10	zircon		MO				1322	5
J15	c	p	76	1327	5.5	11	zircon		MO				1327	5.5
Bourb-435	c	v	76	1472	5.5	11	zircon		MO				1472	5.5
Bourb-204	c	v	76	1463	6	12	zircon		MO				1463	6
													1467	4.5
Freiberg et al 2020													1782	2
sample #	core v outcrop	Plutonic v Volcanic	method	Age (Ma)	1 sigma +/-	2sig +/-	mineral		State				2523	2.5
VER1-rhyolite	c	v		1467	4.5	9	zircon		Il				1804	9
													1705	15
Bickford et al., 2015	Table 1												1616	14.5
sample #	core v outcrop	Plutonic v Volcanic	method	Age (Ma)	1 sigma +/-	2sig +/-	mineral		State				1592	3.5
IALY-007	c	v		1782	2	4	zircon		IA				1579	4.5
IALY-009	c	p		2523	2.5	5	zircon		IA				1594	12.5
IAOS-001	c	p		1804	9	18	zircon		IA				1667	3.5
IAPL-M8	c	p		1705	15	30	zircon		IA				1661	13
KSGE-006	c	p		1616	14.5	29	zircon		KS				1666	4
KSGH-042	c	p		1592	3.5	7	zircon		KS				1609	3
KSGH-043	c	p		1579	4.5	9	zircon		KS				1626	7.5
KSGH-044	c	p		1594	12.5	25	zircon		KS				1608	1.5
KSJA-007	c	p		1667	3.5	7	zircon		KS				1780	10
KSJW-001	c	p		1661	13	26	zircon		KS				1613	10.5
KSKE-001	c	p		1666	4	8	zircon		KS				1579	5
KSNM-018	c	p		1609	3	6	zircon		KS				1649	3
KSNM-019	c	p		1626	7.5	15	zircon		KS				1675	4
KSNM-020	c	p		1608	1.5	3	zircon		KS				1580	6
KSNM-021	c	p		1780	10	20	zircon		KS				1661	12
KSNM-053	c	p		1613	10.5	21	zircon		KS				1505	15
KSNM-058	c	p		1579	5	10	zircon		KS				1716	14.5
KSNM-059	c	p		1649	3	6	zircon		KS				1633	25
KSNT-163	c	p		1675	4	8	zircon		KS				1648	7
KSNT-334	c	p		1580	6	12	zircon		KS				1637	20
KSNT-378	c	p		1661	12	24	zircon		KS				1503	10
KSRS-573	c	p		1505	15	30	zircon		KS				1598	8.5
KSST-001	c	p		1716	14.5	29	zircon		KS				1644	13
MOCM-002	c	p		1633	25	50	zircon		MO				1574	25
MODD-001	c	p		1648	7	14	zircon		MO				1680	16
MOGE-001	c	p		1637	20	40	zircon		MO				1787	5
MOIR-RGR	o	v		1503	10	20	zircon		MO				1775	5
MOLC-003	c	p		1598	8.5	17	zircon		MO				1639	6
MOOS-002	c	v		1644	13	26	zircon		MO				1802	2.5
MOSC-002	c	p		1574	25	50	zircon		MO				1780	3.5
MOWR-001	c	v		1680	16	32	zircon		MO				1775	5
NBBF-001	c	p		1787	5	10	zircon		NB				1650	5
NBBU-001	c	p		1775	5	10	zircon		NB				1500	10
NBCS-002	c	p		1639	6	12	zircon		NB				1714	5
NBDA-002	c	p		1802	2.5	5	zircon		NB				1374	7.5
NBHK-001	c	p		1780	3.5	7	zircon		NB				1396	20
NBKP-001	c	p		1775	5	10	zircon		NB				1370	15
NBMP-003	c	p		1650	5	10	zircon		NB				1399	47.5
ONMI-001a	c	p		1500	10	20	zircon		Ontario				1484	3.5
ONMI-002a	c	p		1714	5	10	zircon		Ontario				1465	16
													1480	15
du Bray et al., 2015													1478	21.5
sample #	core v outcrop	Plutonic v Volcanic	method	Age (Ma)	1 sigma +/-	2sig +/-	mineral		State				1408	6
OKJO-TG		p	Zircon	1374	7.5	15	zircon		OK				1354	13
OKJO-BRG		p	Zircon	1396	20	40	zircon		OK				1382	6.5
OKMY-SG1		p	Zircon	1370	15	30	zircon		OK				1450	7.5
		p	Zircon	1399	47.5	95	zircon		OK				1382	1
MOMA-SMG		p	Zircon	1484	3.5	7	zircon		MO				1408	10.5
MOSF-BHG		p	Zircon	1465	16	32	zircon		MO				1372	10
MOSF-BTG		p	Zircon	1480	15	30	zircon		MO				1458	5
MOSG-HPGn		p	Zircon	1478	21.5	43	zircon		MO				1443	6
		p	Zircon	1408	6	12	zircon		MO				1365	50.5
KSHS-008	c	p	Zircon	1354	13	26	zircon		KS				1465	3.5
KSRL-035	c	p	Zircon	1382	6.5	13	zircon		KS				1465	5
KSRS-243	c	p	Zircon	1450	7.5	15	zircon		KS				1367	1.5
KSSC-001	c	p	Zircon	1382	1	2	zircon		KS				1473	7.5
KSWO-X01		p	Zircon	1408	10.5	21	zircon		KS				1365	5
	c	p	Zircon	1372	10	20	zircon		KS				1485	5
MOGA-002	c	p	Zircon	1458	5	10	zircon		MO				1466	3
MOHW-001	c	p	Zircon	1443	6	12	zircon		MO				1465	4
MOJK-001	c	p	Zircon	1365	50.5	101	zircon		MO				1446	2
MOLC-005	c	p	Zircon	1465	3.5	7	zircon		MO				1457	5
MOLC-006	c	p	Zircon	1465	5	10	zircon		MO				1472	1
MOMC-002	c	p	Zircon	1367	1.5	3	zircon		MO				1439	36
MOSH-013	c	p	Zircon	1473	7.5	15	zircon		MO				1347	3
	c	p	Zircon	1365	5	10	zircon		MO				1376	2
IAJK-001	c	p	Zircon	1485	5	10	zircon		IA				1406	41
ILHY-001	c	p	Zircon	1466	3	6	zircon		IL				1467	21
ILST-003	c	p	Zircon	1465	4	8	zircon		IL				1473	6
INPO-001	c	p	Zircon	1446	2	4	zircon		IN				1474	7.5
KYPU-001	c	p	Zircon	1457	5	10	zircon		KY				1458	3.5
MI 81-12	c	p	Zircon	1472	1	2	zircon		MI				1493	6.5
MISC-001	c	p	Zircon	1439	36	72	zircon		MI				1335	2
ARFU-001	c	p	Zircon	1347	3	6	zircon		AR				1358	12.5
ARSP-001	c	p	Zircon	1376	2	4	zircon		AR				1466	6.5
MISC-003	c	p	Zircon	1406	41	82	zircon		MI				1370	2
MOAT-003	c	p	Zircon	1467	21	42	zircon		MO				1464	2.5
MOCT-013	c	p	Zircon	1473	6	12	zircon		MO				1491	9
MODN-005	c	p	Zircon	1474	7.5	15	zircon		MO				1328	2
MOFR-006	c	p	Zircon	1458	3.5	7	zircon		MO				1480	21
MOFR-009z	c	p	Zircon	1493	6.5	13	zircon		MO				1323	3
MOHO-003	c	p	Zircon	1335	2	4	zircon		MO				1364	5
MOIR-GVG		p	Zircon	1358	12.5	25	zircon		MO				1489	7.5
MOIR-CCG		p	Zircon	1466	6.5	13	zircon		MO				1339	6
MOPO-003	c	p	Zircon	1370	2	4	zircon		MO				1361	3
MORI-010	c	p	Zircon	1464	2.5	5	zircon		MO				1378	3
MOSF-KLG		p	Zircon	1491	9	18	zircon		MO				1397	3.5
MOSG-003	c	p	Zircon	1328	2	4	zircon		MO				1372	2
MOSH-085	c	p	Zircon	1480	21	42	zircon		MO				1383	4
MOSH-100	c	p	Zircon	1323	3	6	zircon		MO				1372	10
MOVE-001	c	p	Zircon	1364	5	10	zircon		MO				1370	1
MOWA-SJM		p	Zircon	1489	7.5	15	zircon		MO				1461	3
KSDG-003	c	p	Zircon	1339	6	12	zircon		KS				1454	7
KS MI-004	c	p	Zircon	1361	3	6	zircon		KS				1428	1.5
MORE-MGP		p	Zircon	1378	3	6	zircon		MO				1431	9
OKJO-X04		p	Zircon	1397	3.5	7	zircon		OK				1441	2
OKLF-001	c	p	Zircon	1372	2	4	zircon		OK				1371	7
OKOT-007	c	p	Zircon	1383	4	8	zircon		OK				1482	4.5
OKPC-005	c	p	Zircon	1372	10	20	zircon		OK				1436	4
TXMO-001	c	p	Zircon	1370	1	2	zircon		TX				1433	3
ILST-001	c	p	Zircon	1461	3	6	zircon		IL				1454	6
INPO-002	c	p	Zircon	1454	7	14	zircon		IN				1380	16.5
KSMS-044	c	p	Zircon	1428	1.5	3	zircon		KS				1460	6
KSMS-046	c	p	Zircon	1431	9	18	zircon		KS				1423	9
KSNM-021	c	p	Zircon	1441	2	4	zircon		KS				1505	15
MOPO-002	c	p	Zircon	1371	7	14	zircon		MO				1379	3
MORI-002	c	p	Zircon	1482	4.5	9	zircon		MO				1471	2.5
NBFN-001	c	p	Zircon	1436	4	8	zircon		NE				1461	18
IACK-001	c	p	Zircon	1433	3	6	zircon		IA				1439	8
KSDC-163	c	p	Zircon	1454	6	12	zircon		KS				1419	3
KSGW-008	c	p	Zircon	1380	16.5	33	zircon		KS				1351	3.5
KSMS-045	c	p	Zircon	1460	6	12	zircon		KS				1343	3
KSMS-047	c	p	Zircon	1423	9	18	zircon		KS				1380	12
KSRS-573	c	p	Zircon	1505	15	30	zircon		KS				1483.6	0.9
KSTH-001	c	p	Zircon	1379	3	6	zircon		KS				1477.9	1.4
MOAT-002	c	p	Zircon	1471	2.5	5	zircon		MO				1469.5	2.45
MODA-002	c	p	Zircon	1461	18	36	zircon		MO				1477.3	1.6
NBFN-002	c	p	Zircon	1439	8	16	zircon		NE				1470.6	0.9
NBGG-001	c	p	Zircon	1419	3	6	zircon		NE				1475.1	1.1
NBRI-001	c	p	Zircon	1351	3.5	7	zircon		NE				1474.2	1.2
NBRI-001	c	p	Zircon	1343	3	6	zircon		NE				1475.4	0.85
OKAF-001	c	p	Zircon	1380	12	24	zircon		OK				1471.1	1.2
TD00-10		p	Zircon	1483.6	0.9	1.8	zircon		WI				1470.5	0.8
VS70-51		p	Zircon	1477.9	1.4	2.8	zircon		WI				1467.8	2.1
VS70-51		p	Zircon	1469.5	2.45	4.9	zircon		WI				1522	3
TD02-01		p	Zircon	1477.3	1.6	3.2	zircon		WI				1505.9	1.35
TD02-01		p	Zircon	1470.6	0.9	1.8	zircon		WI				1468.1	2.5
VS70-91		p	Zircon	1475.1	1.1	2.2	zircon		WI				1341	34.5
TD00-25		p	Zircon	1474.2	1.2	2.4	zircon		WI				1355	12
TD00-17		p	Zircon	1475.4	0.85	1.7	zircon		WI				1339	14.5
VS73-04		p	Zircon	1471.1	1.2	2.4	zircon		WI				1380	22.5
VS70-75		p	Zircon	1470.5	0.8	1.6	zircon		WI				1359	19.5
TD00-07		p	Zircon	1467.8	2.1	4.2	zircon		WI				1348	27.5
VS70-119		p	Zircon	1522	3	6	zircon		WI				1383	5
VS72-57		p	Zircon	1505.9	1.35	2.7	zircon		WI				1380	22.5
TD00-03		p	Zircon	1468.1	2.5	5	zircon		WI				1372	34.5
TX-BA41-2570	c	p	Zircon	1341	34.5	69	zircon		TX				1362	6
TX-MB09-2886	c	p	Zircon	1355	12	24	zircon		TX				1347	14
TX-MB23-2123	c	p	Zircon	1339	14.5	29	zircon		TX				1439	5.5
TX-MB224-2020	c	p	Zircon	1380	22.5	45	zircon		TX				1383	20
TX-MM3-2990	c	p	Zircon	1359	19.5	39	zircon		TX				1386	8.5
TX-SA7-2980	c	p	Zircon	1348	27.5	55	zircon		TX				1363	4
TX-TTU86	c	p	Zircon	1383	5	10	zircon		TX				1389	5
TX-MB23-2438	c	p	Zircon	1380	22.5	45	zircon		TX				1390	3.5
KS MI-004	c	p	Zircon	1372	34.5	69	zircon		KS				1368	1.5
KS MI-004	c	p	Zircon	1362	6	12	zircon		KS				1445	7.5
MOMC-002	c	p	Zircon	1347	14	28	zircon		MO				1461.8	2.75
NBFN-001	c	p	Zircon	1439	5.5	11	zircon		NE
OKJO-BRG		p	Zircon	1383	20	40	zircon		OK
OKJO-X-Burch		p	Zircon	1386	8.5	17	zircon		OK
Tishomingo		p	Zircon	1363	4	8	zircon		OK
BRG-1		p	Zircon	1389	5	10	zircon		OK
GD-4a		p	Zircon	1390	3.5	7	zircon		OK
Troy-33a		p	Zircon	1368	1.5	3	zircon		OK
	c	p	Zircon	1445	7.5	15	zircon		NE
		p	Zircon	1461.8	2.75	5.5	zircon		MO

## Sheet: Ig Zircon SW
Holland et al 2020
sample #	core v outcrop	Plutonic v Volcanic	method	Age (Ma)	1 sigma +/-	2sig +/-	mineral		State				Age	±1sig
K07-SAN1B	o	p	LAICPMS	1453	6	12	zircon		NM				1453	6
H13-MAN	o	p	LAICPMS	1459	6.5	13	zircon		NM				1459	6.5
K05-ABQ-!R	o	v	SHRIMP-RG	1588	3.5	7	zircon		NM				1588	3.5
K14-Manzanita	o	p	LAICPMS	1655	7	14	zircon		NM				1655	7
CD13-14	o	v	LAICPMS	1660	9.5	19	zircon		NM				1660	9.5
TG15-Ojito	o	p	LAICPMS	1661	8.5	17	zircon		NM				1661	8.5
K15-SEV-ES-RHY	o	v	LAICPMS	1665	8	16	zircon		NM				1665	8
AL04-8	o	p	LAICPMS	1668	6.5	13	zircon		NM				1668	6.5
													1659	6
Amato et al., 2018 NMGS guidebook Table 1													1480	11.5
sample #	core v outcrop	Plutonic v Volcanic	method	Age (Ma)	1 sigma +/-	2sig +/-	mineral		State				1638	9
13KD-11	o	p	LAICPMS	1659	6	12	zircon		NM				1624	5.5
12CR-04	o	p	LAICPMS	1480	11.5	23	zircon		NM				1452	10.5
12CR-04	o	p	LAICPMS	1638	9	18	zircon		NM				1652	15.5
01FM-3	o	p	LAICPMS	1624	5.5	11	zircon		NM				1464	10.5
15FC-1	o	p	LAICPMS	1452	10.5	21	zircon		NM				1688	18.5
15FC-1	o	p	LAICPMS	1652	15.5	31	zircon		NM				1653	7.5
15FC-2	o	p	LAICPMS	1464	10.5	21	zircon		NM				1656	7.5
13MS-03	o	p	LAICPMS	1688	18.5	37	zircon		NM				1651	10.5
13MS-06	o	p	LAICPMS	1653	7.5	15	zircon		NM				1666	7
13MS-09	o	m	LAICPMS	1656	7.5	15	zircon		NM				1644	7
13MS-10	o	p	LAICPMS	1651	10.5	21	zircon		NM				1259	60
13CM-11	o	p	LAICPMS	1666	7	14	zircon		NM				1440	12.5
13CM-14	o	DZ	LAICPMS	1644	7	14	zircon		NM				1445	5
03SD-1	o	p	LAICPMS	1259	60	120	zircon		NM				1445	7.5
06OR-1	o	p	SHRIMP	1440	12.5	25	zircon		NM				1766	3.5
09SA-15D	o	p	SHRIMP	1445	5	10	zircon		NM				1710	5
09SA15D	o	p	LAICPMS	1445	7.5	15	zircon		NM				1711	6.5
													1706	3
Moscati et al., 2017, Table 1													1691	2.5
sample #	core v outcrop	Plutonic v Volcanic	method	Age (Ma)	1 sigma +/-	2sig +/-	mineral		State				1695	5.5
8-13-82-2	o	p		1766	3.5	7	zircon		CO				1681	7.5
R8-20-84-1	o	p		1710	5	10	zircon		CO				1709	3
8-12-82-2	o	p		1711	6.5	13	zircon		CO				1451	6.5
8-7-82-1	o	p		1706	3	6	zircon		CO				1425	6
8-11-84-3	o	p		1691	2.5	5	zircon		CO				1434	3
R8-17-83-2A	o	p		1695	5.5	11	zircon		CO				1439	5.5
9-26-84-3	o	p		1681	7.5	15	zircon		CO				1435	7.5
CM11-736	o	p		1709	3	6	zircon		CO				1415	7.5
8-12-82-1	o	p		1451	6.5	13	zircon		CO				1436	5.5
9-1-84-10	o	p		1425	6	12	zircon		CO				1436	7
GR10-511	o	p		1434	3	6	zircon		CO				1419	7
9-13-84-1	o	p		1439	5.5	11	zircon		CO				1429	4.5
9-1-84-11	o	p		1435	7.5	15	zircon		CO				1414	10
9-8-83-1	o	p		1415	7.5	15	zircon		CO				1441	27
R8-10-83-1	o	p		1436	5.5	11	zircon		CO				1438	5.5
9-2-88-7	o	p		1436	7	14	zircon		CO				1436	4
9-1-84-2	o	p		1419	7	14	zircon		CO				1434	4
WRP 03-6B	o	p		1429	4.5	9	zircon		CO				1435	13
8-3-83-1	o	p		1414	10	20	zircon		CO				1371	7
HL09-53	o	p		1441	27	54	zircon		CO				1344	9.5
MP09-191	o	p		1438	5.5	11	zircon		CO				1362	3.5
HL09-121	o	p		1436	4	8	zircon		CO				1423	14
WRP 03-7	o	p		1434	4	8	zircon		CO				1459	7
8-31-84-3	o	p		1435	13	26	zircon		CO				1474	3.5
													1460	10.5
du Bray et al., 2015													1441	41
sample #	core v outcrop	Plutonic v Volcanic	method	Age (Ma)	1 sigma +/-	2sig +/-	mineral		State				1486	18
CO-SD2		p	Zircon	1371	7	14	zircon		CO				1439	4
CO-SD2		p	Zircon	1344	9.5	19	zircon		CO				1442	3.5
CO-SC2		p	Zircon	1362	3.5	7	zircon		CO				1404	1
VS-8		p	Zircon	1423	14	28	zircon		CO				1410	2
VS-9		p	Zircon	1459	7	14	zircon		CO				1410	2
CO-7		p	Zircon	1474	3.5	7	zircon		CO				1414	2.5
CO-9		p	Zircon	1460	10.5	21	zircon		CO				1410	2
NOB-1		p	Zircon	1441	41	82	zircon		CO				1418	1
BC-1		p	Zircon	1486	18	36	zircon		CO				1414	2.5
RG-6		p	Zircon	1439	4	8	zircon		CO				1370	5
RV-1C		p	Zircon	1442	3.5	7	zircon		CO				1370	5
BW-1		p	Zircon	1404	1	2	zircon		AZ				1433	0.75
1164		p	Zircon	1410	2	4	zircon		AZ				1430	1.3
1168		p	Zircon	1410	2	4	zircon		AZ				1437.8	1.6
A-153		p	Zircon	1414	2.5	5	zircon		AZ				1435	3.5
JW-10		p	Zircon	1410	2	4	zircon		AZ				1434	1
JW-13		p	Zircon	1418	1	2	zircon		AZ				1434	1
A-151-A		p	Zircon	1414	2.5	5	zircon		AZ				1447	4.5
77L-320		p	Zircon	1370	5	10	zircon		ID				1437	2.5
77L-321		p	Zircon	1370	5	10	zircon		ID				1428	11.5
91PH1		p	Zircon	1433	0.75	1.5	zircon		WY				1435	2
91PH6a		p	Zircon	1430	1.3	2.6	zircon		WY				1390	5
94SMW2		p	Zircon	1437.8	1.6	3.2	zircon		WY				1470	8
NMGC7		p	Zircon	1435	3.5	7	zircon		CO				1469	6
		p	Zircon	1434	1	2	zircon		CO				1463	4
J01-MP1		p	Zircon	1434	1	2	zircon		CO				1463	6.5
J01-M1		p	Zircon	1447	4.5	9	zircon		CO				1463	6.5
J02-SC3		p	Zircon	1437	2.5	5	zircon		CO				1461	2
J02-SC1		p	Zircon	1428	11.5	23	zircon		CO				1459	7
J01-WC2		p	Zircon	1435	2	4	zircon		CO				1455	5.5
J01-WC3		p	Zircon	1390	5	10	zircon		CO				1372	9
B204		p	Zircon	1470	8	16	zircon		NM				1369	8.5
B195		p	Zircon	1469	6	12	zircon		NM				1370	8.5
B107		p	Zircon	1463	4	8	zircon		NM				1332	9
B108		p	Zircon	1463	6.5	13	zircon		NM				1400	10
B90b		p	Zircon	1463	6.5	13	zircon		NM				1390	0.5
B148		p	Zircon	1461	2	4	zircon		NM				1420	10
B185		p	Zircon	1459	7	14	zircon		NM				1400	7.5
B184		p	Zircon	1455	5.5	11	zircon		NM				1411	2.5
NM-AM3050	c	p	Zircon	1372	9	18	zircon		NM				1440	10
NM-AM4390	c	p	Zircon	1369	8.5	17	zircon		NM				1427	13
NM-Lea-345	c	p	Zircon	1370	8.5	17	zircon		NM				1419.2	1.7
NM-ME10300	c	p	Zircon	1332	9	18	zircon		NM				1427	13.5
JW-4		p	Zircon	1400	10	20	zircon		CA				1421	7
KCAZ98-10		p	Zircon	1390	0.5	1	zircon		AZ				1416	8.5
		p	Zircon	1420	10	20	zircon		AZ				1418	22
400		p	Zircon	1400	7.5	15	zircon		AZ				1460	10
		p	Zircon	1411	2.5	5	zircon		AZ				1425	12.5
		p	Zircon	1440	10	20	zircon		AZ				1450	12.5
B561		p	Zircon	1427	13	26	zircon		AZ				1450	12.5
		p	Zirconᶧ	1419.2	1.7	3.4	zircon		CA				1450	12.5
BSPZ-1		p	Zircon	1427	13.5	27	zircon		CA				1450	12.5
EPZ-1		p	Zircon	1421	7	14	zircon		CA				1450	12.5
EPZ-2		p	Zircon	1416	8.5	17	zircon		CA				1425	12.5
JW87-100		p	Zircon	1418	22	44	zircon		CA				1439	3.5
		p	Zircon	1460	10	20	zircon		CO				1364	4.5
		p	Zircon	1425	12.5	25	zircon		NV				1420	5
		p	Zircon	1450	12.5	25	zircon		NV				1420	7.5
		p	Zircon	1450	12.5	25	zircon		NV				1440	10
NY-6		p	Zircon	1450	12.5	25	zircon		NV				1450	10
EL-2A		p	Zircon	1450	12.5	25	zircon		NV				1377	2
		p	Zircon	1450	12.5	25	zircon		NV				1366	3
DM-1C		p	Zircon	1425	12.5	25	zircon		NV				1362	3.5
		p	Zircon	1439	3.5	7	zircon		WY				1378	2
1SB514		p	Zircon	1364	4.5	9	zircon		ID				1359	3.5
		p	Zircon	1420	5	10	zircon		AZ				1440	8
		p	Zircon	1420	7.5	15	zircon		AZ				1394	8.5
YA1		p	Zircon	1440	10	20	zircon		AZ				1396	20
		p	Zircon	1450	10	20	zircon		CA				1437	23.5
01KL058		p	Zircon	1377	2	4	zircon		ID				1440	7.5
01KL059		p	Zircon	1366	3	6	zircon		ID				1440	10
01KL060		p	Zircon	1362	3.5	7	zircon		ID				1417.3	2.3
01KL061		p	Zircon	1378	2	4	zircon		ID				1407	6.5
09KL009		p	Zircon	1359	3.5	7	zircon		ID				1408	7.5
		p	Zircon	1440	8	16	zircon		CO				1430	9
		p	Zircon	1394	8.5	17	zircon		CO				1430	10
		p	Zircon	1396	20	40	zircon		CO				1434	4.75
		p	Zircon	1437	23.5	47	zircon		NM				1426	16
		p	Zircon	1440	7.5	15	zircon		WY				1429	4.5
		p	Zircon	1440	10	20	zircon		WY				1433	5.5
		p	Zirconᶧ	1417.3	2.3	4.6	zircon		CA				1422	17.5
07JC-RF-8		p	Zircon	1407	6.5	13	zircon		CO				1424	3
RU 06-359		p	Zircon	1408	7.5	15	zircon		CO				1429	5
WRP 97-2		p	Zircon	1430	9	18	zircon		CO				1411	5
WRP 97-3		p	Zircon	1430	10	20	zircon		CO				1449	4.5
EP 03-59		p	Zircon	1434	4.75	9.5	zircon		CO				1391	13.5
EM 03-56		p	Zircon	1426	16	32	zircon		CO				1429	7.5
EM 03-57		p	Zircon	1429	4.5	9	zircon		CO				1437	3
9-6-07-5		p	Zircon	1433	5.5	11	zircon		CO				1430	7.5
9-20-08-4		p	Zircon	1422	17.5	35	zircon		CO				1431	5
WRP 03-1		p	Zircon	1424	3	6	zircon		CO				1436	3
BB 04-9		p	Zircon	1429	5	10	zircon		CO				1415	3
ME05-114		p	Zircon	1411	5	10	zircon		CO				1435	5.5
WRP 05-3		p	Zircon	1449	4.5	9	zircon		CO				1440	5.5
EH-2006-01		p	Zircon	1391	13.5	27	zircon		CO				1436	2.5
JF-2006-01		p	Zircon	1429	7.5	15	zircon		CO				1432	2.5
CR-OR1-2008		p	Zircon	1437	3	6	zircon		CO				1444	7.5
CR-OR2-2008		p	Zircon	1430	7.5	15	zircon		CO				1433	5.5
WRP 03-6B		p	Zircon	1431	5	10	zircon		CO				1442	2.5
WRP 03-7		p	Zircon	1436	3	6	zircon		CO				1451	6.5
8-3-83-1		p	Zircon	1415	3	6	zircon		CO				1429	35
R8-10-83-1		p	Zircon	1435	5.5	11	zircon		CO				1443	1.5
9-1-84-11		p	Zircon	1440	5.5	11	zircon		CO				1423	4
9-8-83-1		p	Zircon	1436	2.5	5	zircon		CO				1440	5
9-1-84-2		p	Zircon	1432	2.5	5	zircon		CO				1441	4.5
9-1-84-10		p	Zircon	1444	7.5	15	zircon		CO				1434	5.5
9-2-88-7		p	Zircon	1433	5.5	11	zircon		CO				1441	4.5
9-13-84-1		p	Zircon	1442	2.5	5	zircon		CO				1437	2
8-12-82-1		p	Zircon	1451	6.5	13	zircon		CO				1425	4
8-31-84-3		p	Zircon	1429	35	70	zircon		CO				1449	5
GR10-511		p	Zircon	1443	1.5	3	zircon		CO				1441	3.5
SP-9		p	Zircon	1423	4	8	zircon		CO				1434	5.5
WRP 03-48		p	Zircon	1440	5	10	zircon		CO				1441	2
WRP 08-1		p	Zircon	1441	4.5	9	zircon		CO				1441	3
WRP 03-22		p	Zircon	1434	5.5	11	zircon		CO				1451	7
WRP 03-23		p	Zircon	1441	4.5	9	zircon		CO				1338	6.5
SGC-7		p	Zircon	1437	2	4	zircon		CO				1358	5
SGC-61		p	Zircon	1425	4	8	zircon		CO				1422	6
WRP 03-25		p	Zircon	1449	5	10	zircon		CO				1438	4.5
WRP 03-26		p	Zircon	1441	3.5	7	zircon		CO				1439	4
WRP 03-27		p	Zircon	1434	5.5	11	zircon		CO				1422	4.5
WRP 03-28		p	Zircon	1441	2	4	zircon		CO				1448	4.5
WRP 05-2		p	Zircon	1441	3	6	zircon		CO				1441.8	0.55
UN-2 & 3		p	Zircon	1451	7	14	zircon		CO				1439	8.5
SGC-13		p	Zircon	1338	6.5	13	zircon		CO				1433	4
SGC-59		p	Zircon	1358	5	10	zircon		CO				1429	8
G02-9		p	Zircon	1422	6	12	zircon		NM				1413	2.5
G02-21		p	Zircon	1438	4.5	9	zircon		NM				1400	2.5
G02-25		p	Zircon	1439	4	8	zircon		NM				1398	2.5
G02-33		p	Zircon	1422	4.5	9	zircon		NM				1433	1.1
A50918-1		p	Zircon	1448	4.5	9	zircon		CO				1442	8
A50918-2		p	Zircon	1441.8	0.55	1.1	zircon		CO				1428	3
O'Neill Hills		p	Zircon	1439	8.5	17	zircon		AZ				1434	3
MOHP-2		p	Zircon	1433	4	8	zircon		AZ				1450	6
MOHP-B		p	Zircon	1429	8	16	zircon		AZ				1445	19
YUMA (YI8)		p	Zircon	1413	2.5	5	zircon		AZ				1675	27
MSDCyn#4B		p	Zircon	1400	2.5	5	zircon		CA				1733	33
Glendora Ridge #5		p	Zircon	1398	2.5	5	zircon		CA				1460	6
UN-2 & 4		p	Zircon	1433	1.1	2.2	zircon		CO				1721	44
RINZ-1		p	Zircon	1442	8	16	zircon		AZ				1419	51
RINZ-4		p	Zircon	1428	3	6	zircon		AZ				1692	18
J07SF5		p	Zircon	1434	3	6	zircon		NM				1697	10
													1450	40
Grambling et al., 2015 NMGS guidebook													1693	32
sample #	core v outcrop	Plutonic v Volcanic	method	Age (Ma)	1 sigma +/-	2sig +/-	mineral		State				1459	32
K13-NAC-2A/B	o	p	LAICPMS	1450	6	12	zircon		NM				1698	21
													1793	17
Spencer et al., 2015													1455	13
sample #	core v outcrop	Plutonic v Volcanic	method	Age (Ma)	1 sigma +/-	2sig +/-	mineral		State				1462	40
F26155			ui	1445	19	38	zircon		AZ				1778	25
BS05629			ui	1675	27	54	zircon		AZ				1653	48
DM04655			ui	1733	33	66	zircon		AZ				1710	5
DM04656			ui	1460	6	12	zircon		AZ				1699	1.5
DMO4560			ui	1721	44	88	zircon		AZ				1450	2.5
DM04560			ui	1419	51	102	zircon		AZ				1488	3
DM04670			ui	1692	18	36	zircon		AZ				1645	3.5
BS05845			ui	1697	10	20	zircon		AZ				1628	5.5
DM03710			ui	1450	40	80	zircon		AZ				1631	4
DM03711			ui	1693	32	64	zircon		AZ				1681	6
DM04669			ui	1459	32	64	zircon		AZ				1486	8
DM04670			ui	1698	21	42	zircon		AZ				1487	12
DM04671			ui	1793	17	34	zircon		AZ				1654	7.5
BS04329			ui	1455	13	26	zircon		AZ				1700	4.5
BS04329			ui	1462	40	80	zircon		AZ				1693	5.5
BS04329			ui	1778	25	50	zircon		AZ				1693	0.5
BS04330			ui	1653	48	96	zircon						1633	1.5
													1736	10.5
Daniel et al., 2013													1680	8
sample #	core v outcrop	Plutonic v Volcanic	method	Age (Ma)	1 sigma +/-	2sig +/-	mineral		State				1684	7
CD12-6	o	v	LAICPMS	1710	5	10	zircon		NM				1657	15.5
J10Pic11	o	p	LAICPMS	1699	1.5	3	zircon		NM				1633	8.5
CD12-7	o	p	LAICPMS	1450	2.5	5	zircon		NM				1630	7
CD12-9	o	v	LAICPMS	1488	3	6	zircon		NM				1706	2.5
													1698	2
Jones, D., et al, 2013													1633	4
sample #	core v outcrop	Plutonic v Volcanic	method	Age (Ma)	1 sigma +/-	2sig +/-	mineral		State				1676	8.5
SM294	o			1645	3.5	7	zircon						1652	16.5
WRP 81-25	o			1628	5.5	11	zircon						1674	13
SM329	o			1631	4	8	zircon						1617	5.5
													1631	10.5
Amato et al., 2012 NMGS Guidebook													1649	6.5
sample #	core v outcrop	Plutonic v Volcanic	method	Age (Ma)	1 sigma +/-	2sig +/-	mineral		State				1786	5
06CM-02	o	p	SHRIMP	1681	6	12	zircon		NM				1801	3
06CM-04	o	p	SHRIMP	1486	8	16	zircon		NM				1754	3.5
06-CM-01	o	p	SHRIMP	1487	12	24	zircon		NM				1771	1.5
06KD-02	o	p	SHRIMP	1654	7.5	15	zircon		NM				1759	3
													1757	3.5
Davis et al., 2011													1766	7.5
sample #	core v outcrop	Plutonic v Volcanic	method	Age (Ma)	1 sigma +/-	2sig +/-	mineral		State				1772	2
TP74	o	p	ID-TIMS	1700	4.5	9	zircon		NM				1717	5
TP75	o	p	ID-TIMS	1693	5.5	11	zircon		NM				1731	4.5
TG26	o	p	ID-TIMS	1693	0.5	1	zircon		NM				1698	2
TP210	o	p	ID-TIMS	1633	1.5	3	zircon		NM				1695	1
													1481	23.5
Spencer and Pecha, 2012													1435	1.5
sample #	core v outcrop	Plutonic v Volcanic	method	Age (Ma)	1 sigma +/-	2sig +/-	mineral		State				1438	4.5
4-15-11-1		p		1736	10.5	21	zircon		AZ				1442	1.5
2-14-11-1		p		1680	8	16	zircon		AZ				1435	0.5
													1434	1
Amato et al., 2011 GSAB Table 1			1.4 ages are in du Bray et al 2015 database										1713	1
sample #	core v outcrop	Plutonic v Volcanic	method	Age (Ma)	1 sigma +/-	2sig +/-	mineral		State				1711	1
B183	o		LAMCICPMS	1684	7	14	zircon		NM				1413	1
B137	o		LAMCICPMS	1657	15.5	31	zircon		NM				1633	2.5
B202	o		LAMCICPMS	1633	8.5	17	zircon		NM				1712	1.5
B83	o		LAMCICPMS	1630	7	14	zircon		NM				1686	2.5
													1685	2
Jones et al., 2009													1644	7
sample #	core v outcrop	Plutonic v Volcanic	method	Age (Ma)	1 sigma +/-	2sig +/-	mineral		State				1641	2.5
J01-BR3	o			1706	2.5	5	zircon		CO				1632	3.5
K00-BR-25	o			1698	2	4	zircon		CO				1436	1
													1435	1.5
Amato et al., 2008, Table 3													1434	1
sample #	core v outcrop	Plutonic v Volcanic	method	Age (Ma)	1 sigma +/-	2sig +/-	mineral		State				1634	1
03BM-110	o	v	SHRIMP	1633	4	8	zircon		NM				1647	1
04BM-137	o	p	LAMCICPMS	1676	8.5	17	zircon		NM				1641	7.5
01FM-3	o	p	LAMCICPMS	1652	16.5	33	zircon		NM				1615	2.5
03SA-2c	o	p	SHRIMP	1674	13	26	zircon		NM				1654	3
03SA-2c	o	p	SHRIMP	1617	5.5	11	zircon		NM				1643	2.5
DMC-1	o	p	SHRIMP	1631	10.5	21	zircon		NM				1442	8
SA-2	o	p	SHRIMP	1649	6.5	13	zircon		NM				1428	3
													1645	0.5
Gonzales and Van Schmus, 2007													1647	0.5
sample #	core v outcrop	Plutonic v Volcanic	method	Age (Ma)	1 sigma +/-	2sig +/-	mineral		State				1736	0.5
NM 22	o	v		1786	5	10	zircon		CO				1638	2
NM 25	o	v		1801	3	6	zircon		CO				1625	32.5
NM 3	o	p		1754	3.5	7	zircon		CO				1633	1.5
NM 14	o	p		1771	1.5	3	zircon		CO				1423	1
NM 13	o	p		1759	3	6	zircon		CO				1634	28
NM 16	o	p		1757	3.5	7	zircon		CO				1682	7
NM 17	o	p		1766	7.5	15	zircon		CO				1423	1.4
NM 28	o	p		1772	2	4	zircon		CO				1750	1
NM 21	o	p		1717	5	10	zircon		CO				1741	0.5
NM 23	o	p		1731	4.5	9	zircon		CO				1840	0.5
NM 6	o	p		1698	2	4	zircon		CO				1740	1
NM 26	o	p		1695	1	2	zircon		CO				1737	0.5
NM 2	o	p		1481	23.5	47	zircon		CO				1730	1.5
NM 7	o	p		1435	1.5	3	zircon		CO				1717	0.5
NM 8	o	p		1438	4.5	9	zircon		CO				1713	1
NM 10	o	p		1442	1.5	3	zircon		CO				1698	0.5
NM 27	o	p		1435	0.5	1	zircon		CO				1697	0.5
													1685	0.5
Jessup et al., 2006													1680	0.5
sample #	core v outcrop	Plutonic v Volcanic	method	Age (Ma)	1 sigma +/-	2sig +/-	mineral		State				1662	0.5
K00BC9	o	p		1434	1	2	zircon		CO				1632	12
J01-BC7	o	p		1713	1	2	zircon		CO				1462	33.5
J01-BC6	o	p		1711	1	2	zircon		CO				1735	3.5
J01-BC2	o	p		1413	1	2	zircon		CO				1694	7
													1682	2
Ramo et al 2003													1727	4
sample #	core v outcrop	Plutonic v Volcanic	method	Age (Ma)	1 sigma +/-	2sig +/-	mineral		State				1713	6
NM311	o	p		1633	2.5	5	zircon		NM				1730	4.5
													1781	4
Spencer et al 2003													1770	2
sample #	core v outcrop	Plutonic v Volcanic	method	Age (Ma)	1 sigma +/-	2sig +/-	mineral		State				1766	7
WG-3-7-98-5	o	p		1712	1.5	3	zircon		AZ				1770	4
11-16-95-1	o	p		1686	2.5	5	zircon		AZ				1766	2
3-24-98-6 (p15)	o	p		1685	2	4	zircon		AZ				1765	2
3-20-97-4	o	p		1644	7	14	zircon		AZ				1759	3
10-22-86-2	o	p		1641	2.5	5	zircon		AZ				1757	5
10-22-86-3	o	p		1632	3.5	7	zircon		AZ				1751	3
3-24-98-1	o	p		1436	1	2	zircon		AZ				1745	8
F9-166	o	p		1435	1.5	3	zircon		AZ				1742	3
CAF-02-3730	o	p		1434	1	2	zircon		AZ				1740	4
													1733	5.5
Eisele and Isachsen, 2001, Table 1													1730	3.5
sample #	core v outcrop	Plutonic v Volcanic	method	Age (Ma)	1 sigma +/-	2sig +/-	mineral		State				1728	8
DCZ-23	o	p		1634	1	2	zircon		AZ				1730	3
DC-46	o	v		1647	1	2	zircon		AZ				1721	3.5
DCZ-52	o			1641	7.5	15	zircon		AZ				1713	5
PINZ-2	o	p		1615	2.5	5	zircon		AZ				1700	3.5
LDZ-3	o	v		1654	3	6	zircon		AZ				1701	5
JoLyZ-1	o	p		1643	2.5	5	zircon		AZ				1676	2.5
RINZ-1	o	p		1442	8	16	zircon		AZ				1728	3
RINZ-4	o	p		1428	3	6	zircon		AZ				1672	2.5
MARZ-2	o	p		1645	0.5	1	zircon		AZ				1668	9
BUZ-1	o	p		1647	0.5	1	zircon		AZ				1713	7
WPZ-58	o	p		1736	0.5	1	zircon		AZ				1705	4
													1706	2.5
Isachsen, C.E., Gehrels, G.E., Riggs, N.R., Spencer, J.E., Ferguson, C.A., Skotnicki, S.J., and Richard, S.M., 1999, Table 1													1703	3.5
sample #	core v outcrop	Plutonic v Volcanic	method	Age (Ma)	1 sigma +/-	2sig +/-	mineral		State				1666	11
FX-189	c	p		1638	2	4	zircon		AZ				1694	5
FZ-151	c	p		1625	32.5	65	zircon		AZ				1663	2
2-6-97-1	c	p		1633	1.5	3	zircon		AZ				1665	2.5
5.5.97.1	c	p		1423	1	2	zircon		AZ				1622	2.5
F94-2444	c	p		1634	28	56	zircon		AZ				1653	25
													1615	1.5
Read et al., 1999													1486	18
sample #	core v outcrop	Plutonic v Volcanic	method	Age (Ma)	1 sigma +/-	2sig +/-	mineral		State				2683	3
ARR 95-73	o	p	ID_TIMS	1682	7	14	zircon		NM				2429	2
													2710	5
Pedrick et al., 1998													2092	4.5
sample #	core v outcrop	Plutonic v Volcanic	method	Age (Ma)	1 sigma +/-	2sig +/-	mineral		State				1780	3
SAB 94-35	o	p	ID_TIMS	1423	1.4	3	zircon		NM				1792	7.5
													1779	2.5
Hawkins et al, 1996													1744	7
sample #	core v outcrop	Plutonic v Volcanic	method	Age (Ma)	1 sigma +/-	2sig +/-	mineral		State				1763	3
84.4-1	o	v		1750	1	2	zircon		AZ				1749	4
79.6-1	o	v		1741	0.5	1	zircon		AZ				1627	2
113.2-1	o	p		1840	0.5	1	zircon		AZ				1735	4
84.9-1	o	p		1740	1	2	zircon		AZ				1746	3
81.2-3	o	p		1737	0.5	1	zircon		AZ				1765	4
91.5-1	o	p		1730	1.5	3	zircon		AZ				1720	4
104.3-4	o	p		1717	0.5	1	zircon		AZ				1777	2
90.6-2	o	p		1713	1	2	zircon		AZ				1781	3.5
85.2-4	o	p		1698	0.5	1	zircon		AZ				1744	9
111.8-1	o	p		1697	0.5	1	zircon		AZ				1714	3
80.5-1	o	p		1685	0.5	1	zircon		AZ				1672	4
78.0-1	o	p		1680	0.5	1	zircon		AZ				1670	2
87.7-1	o	p		1662	0.5	1	zircon		AZ				1750	5
													1741	6
Roths, 1991 NMGS													1730	10
sample #	core v outcrop	Plutonic v Volcanic	method	Age (Ma)	1 sigma +/-	2sig +/-	mineral		State				1699	2
106A	o	p	ID-TIMS	1632	12	24	zircon		NM				1679	10
110E	o	p	id-TIMS	1462	33.5	67	zircon		NM				1644	10
													1664	1.5
Chamberlin and Bowring, 1990													1654	0.5
sample #	core v outcrop	Plutonic v Volcanic	method	Age (Ma)	1 sigma +/-	2sig +/-	mineral		State				1648	1.5
Az 273	o	v		1735	3.5	7	zircon		AZ				1659	1.5
Az 244	o	p		1694	7	14	zircon		AZ
AZ 254	o	p		1682	2	4	zircon		AZ
Az 248	o	v		1727	4	8	zircon		AZ
Az 246	o	p		1713	6	12	zircon		AZ
Az 251	o	p		1730	4.5	9	zircon		AZ
Bickford et al 1989a
sample #	core v outcrop	Plutonic v Volcanic	method	Age (Ma)	1 sigma +/-	2sig +/-	mineral		State
B-61	o	p		1781	4	8	zircon
B-2	o	v		1770	2	4	zircon
B-60	o	v		1766	7	14	zircon
QCF	o	v		1770	4	8	zircon
B-85	o	v		1766	2	4	zircon
SOC-2	o	v		1765	2	4	zircon
B-82	o	v		1759	3	6	zircon
B-59	o	p		1757	5	10	zircon
B-71	o	p		1751	3	6	zircon
B-85-1	o	v		1745	8	16	zircon
SAB-12	o	v		1742	3	6	zircon
B-13	o	v		1740	4	8	zircon
B-13	o	v		1733	5.5	11	zircon
B-43	o	v		1730	3.5	7	zircon
SOC-1	o	v		1728	8	16	zircon
T-10	o	p		1730	3	6	zircon
B-40	o	p		1721	3.5	7	zircon
B-24	o	p		1713	5	10	zircon
B-42	o	p		1700	3.5	7	zircon
B-70	o	p		1701	5	10	zircon
B-68	o	p		1676	2.5	5	zircon
Z-3	o	p		1728	3	6	zircon
SAL-1	o	p		1672	2.5	5	zircon
HO-1	o	v		1668	9	18	zircon
HO-2	o	v		1713	7	14	zircon
Bickford et al 1989b
sample #	core v outcrop	Plutonic v Volcanic	method	Age (Ma)	1 sigma +/-	2sig +/-	mineral		State
RG-25	o	p		1705	4	8	zircon
RG-4	o	p		1706	2.5	5	zircon
VS-75	o	p		1703	3.5	7	zircon
CO-15	o	p		1666	11	22	zircon
MT-2	o	p		1694	5	10	zircon
MM-B	o	p		1663	2	4	zircon
VS-6	o	p		1665	2.5	5	zircon
MT-9A	o	p		1622	2.5	5	zircon
MT-8	o	p		1653	25	50	zircon
MT-9B	o	p		1615	1.5	3	zircon
BC-1	o	p		1486	18	36	zircon
Premo and Van Schmus, 1989
sample #	core v outcrop	Plutonic v Volcanic	method	Age (Ma)	1 sigma +/-	2sig +/-	mineral		State
81-40	o	p		2683	3	6	zircon
82-05	o	p		2429	2	4	zircon
82-16	o	p		2710	5	10	zircon
82-30	o	p		2092	4.5	9	zircon
81-06	o	v		1780	3	6	zircon
82-13	o	v		1792	7.5	15	zircon
81-22	o	p		1779	2.5	5	zircon
81-24	o	p		1744	7	14	zircon
82-06	o	p		1763	3	6	zircon
82-34	o	p		1749	4	8	zircon
82-08	o	p		1627	2	4	zircon
82-11	o	p		1735	4	8	zircon
82-12A	o	p		1746	3	6	zircon
82-12B	o	p		1765	4	8	zircon
82-17	o	p		1720	4	8	zircon
82-20	o	p		1777	2	4	zircon
82-21	o	p		1781	3.5	7	zircon
82-22	o	p		1744	9	18	zircon
83-01	o	p		1714	3	6	zircon
83-02	o	p		1672	4	8	zircon
83-03	o	p		1670	2	4	zircon
Bowring et al., 1984 GSA abstract
sample #
Red River	core v outcrop	Plutonic v Volcanic	method	Age (Ma)	1 sigma +/-	2sig +/-	mineral		State
Gold Hill		tonalite		1750	5	10	zircon
Columbine		metagabbro		1741	6	12	zircon
Old Mike		Qtz monzonite		1730	10	20	zircon
Jaracito		qtz monzonite		1699	2	4	zircon
Costilla		granodiorite		1679	10	20	zircon
		qtz monzonite		1644	10	20	zircon
Bowring et al., 1983
sample #	core v outcrop								State
Mag-1 Mag-2		Plutonic v Volcanic	method	Age (Ma)	1 sigma +/-	2sig +/-	mineral
Mag 3	o	v	ID-TIMS	1664	1.5	3	zircon
S-82-304	o	p	ID_TIMS	1654	0.5	1	zircon
S-82-305	o	p	ID_TIMS	1648	1.5	3	zircon
	o	p	ID_TIMS	1659	1.5	3	zircon

## Sheet: NVF zircon xenoliths
Crowley et al., 2006 Ta ble 2
sample #	core v outcrop	metamorphic	method	Age (Ma)	1 sigma +/-	2sig +/-	mineral
KRM02-26 Z1a	o	xenolith		1427	0.5	1	Zircon		Age (Ma)	1 sigma +/-
KRM02-26 Z1b	o	xenolith		1429	0.5	1	Zircon		1427	0.5
KRM02-26 Z2a	o	xenolith		1405	0.5	1	Zircon		1429	0.5
KRM02-26 Z2b	o	xenolith		1410	0.5	1	Zircon		1405	0.5
KRM02-26 Z2c	o	xenolith		1404	0.5	1	Zircon		1410	0.5
KRM02-26 Z3a	o	xenolith		1423	0.5	1	Zircon		1404	0.5
KRM02-26 Z3b	o	xenolith		1401	0.5	1	Zircon		1423	0.5
KRM02-26 Z4a	o	xenolith		1408	0.5	1	Zircon		1401	0.5
KRM02-26 Z4b	o	xenolith		1406	0.5	1	Zircon		1408	0.5
KRM02-26 Z5a	o	xenolith		1434	0.5	1	Zircon		1406	0.5
KRM02-26 Z5b	o	xenolith		1415	0.5	1	Zircon		1434	0.5
KRM02-26 Z5c	o	xenolith		1424	0.5	1	Zircon		1415	0.5
KRM02-27 Z1a	o	xenolith		1399	0.5	1	Zircon		1424	0.5
KRM02-27 Z1b	o	xenolith		1399	0.5	1	Zircon		1399	0.5
KRM02-27 Z2a	o	xenolith		1404	0.5	1	Zircon		1399	0.5
KRM02-27 Z2b	o	xenolith		1397	0.5	1	Zircon		1404	0.5
KRM02-27 Z3a	o	xenolith		1407	1	2	Zircon		1397	0.5
KRM02-27 Z3b	o	xenolith		1389	0.5	1	Zircon		1407	1
KRM02-27 Z3c	o	xenolith		1416	1	2	Zircon		1389	0.5
KRM02-27 Z4a	o	xenolith		1430	1	2	Zircon		1416	1
KRM02-27 Z4b	o	xenolith		1415	0.5	1	Zircon		1430	1
KRM02-22 Z2	o	xenolith		1387	2.5	5	Zircon		1415	0.5
KRM02-22 Z3a	o	xenolith		1385	2.5	5	Zircon		1387	2.5
KRM02-22 Z3b	o	xenolith		1386	1.5	3	Zircon		1385	2.5
KRM02-22 Z4a	o	xenolith		1382	2.5	5	Zircon		1386	1.5
KRM02-22 Z4b	o	xenolith		1363	2	4	Zircon		1382	2.5
KRM02-22 Z5a	o	xenolith		1400	1	2	Zircon		1363	2
KRM02-22 Z5b	o	xenolith		1404	1	2	Zircon		1400	1
KRM02-22 Z7	o	xenolith		1371	1.5	3	Zircon		1404	1
KRM02-22 Z8a	o	xenolith		1358	1.5	3	Zircon		1371	1.5
KRM02-22 Z8c	o	xenolith		1365	1.5	3	Zircon		1358	1.5
KRM02-29 Z1a	o	xenolith		1451	2.5	5	Zircon		1365	1.5
KRM02-29 Z1b	o	xenolith		1524	0.5	1	Zircon		1451	2.5
KRM02-29 Z1c	o	xenolith		1439	1.5	3	Zircon		1524	0.5
KRM02-29 Z2a	o	xenolith		1415	1	2	Zircon		1439	1.5
KRM02-29 Z2b	o	xenolith		1400	1.5	3	Zircon		1415	1
KRM02-29 Z3	o	xenolith		1401	1	2	Zircon		1400	1.5
KRM02-29 Z4b	o	xenolith		1401	1	2	Zircon		1401	1
KRM02-29 Z4c	o	xenolith		1409	1	2	Zircon		1401	1
KRM02-29 Z5a	o	xenolith		1399	0.5	1	Zircon		1409	1
KRM02-29 Z5b	o	xenolith		1501	0.5	1	Zircon		1399	0.5
KRM02-29 Z5c	o	xenolith		1391	1	2	Zircon		1501	0.5
KRM02-20 Z1a	o	xenolith		1402	1.5	3	Zircon		1391	1
KRM02-20 Z1b	o	xenolith		1406	0.5	1	Zircon		1402	1.5
KRM02-20 Z2a	o	xenolith		1393	0.5	1	Zircon		1406	0.5
KRM02-20 Z2b	o	xenolith		1394	1	2	Zircon		1393	0.5
KRM02-20 Z3a	o	xenolith		1394	1	2	Zircon		1394	1
KRM02-20 Z3b	o	xenolith		1398	1	2	Zircon		1394	1
KRM02-20 Z4a	o	xenolith		1408	1	2	Zircon		1398	1
KRM02-20 Z4b	o	xenolith		1413	1.5	3	Zircon		1408	1
KRM02-20 Z5	o	xenolith		1426	1.5	3	Zircon		1413	1.5
KTT02-21 Z1a	o	xenolith		1384	0.5	1	Zircon		1426	1.5
KTT02-21 Z1b	o	xenolith		1382	0.5	1	Zircon		1384	0.5
KTT02-21 Z3a	o	xenolith		1416	0.5	1	Zircon		1382	0.5
KTT02-21 Z3b	o	xenolith		1406	0.5	1	Zircon		1416	0.5
KTT02-21 Z3c	o	xenolith		1432	0.5	1	Zircon		1406	0.5
KTT02-21 Z4b	o	xenolith		1400	0.5	1	Zircon		1432	0.5
KTT02-21 Z4c	o	xenolith		1397	0.5	1	Zircon		1400	0.5
KTT02-21 Z5b	o	xenolith		1420	0.5	1	Zircon		1397	0.5
KTT02-21 Z6a	o	xenolith		1600	0.5	1	Zircon		1420	0.5
KTT02-21 Z6b	o	xenolith		1515	0.5	1	Zircon		1600	0.5
KTT02-21 Z6c	o	xenolith		1529	0.5	1	Zircon		1515	0.5
KTT02-27 Z1a	o	xenolith		1411	1	2	Zircon		1529	0.5
KTT02-27 Z1b	o	xenolith		1509	0.5	1	Zircon		1411	1
KTT02-27 Z1c	o	xenolith		1515	0.5	1	Zircon		1509	0.5
KTT02-27 Z3a	o	xenolith		1578	0.5	1	Zircon		1515	0.5
KTT02-27 Z3b	o	xenolith		1613	0.5	1	Zircon		1578	0.5
KTT02-27 Z4a	o	xenolith		1637	0.5	1	Zircon		1613	0.5
KTT02-27 Z4b	o	xenolith		1643	0.5	1	Zircon		1637	0.5
KTT02-27 Z5a	o	xenolith		1453	0.5	1	Zircon		1643	0.5
KTT02-27 Z5b	o	xenolith		1429	0.5	1	Zircon		1453	0.5
JE03-SH-1 Z1	o	xenolith		1416	1	2	Zircon		1429	0.5
JE03-SH-1 Z2a	o	xenolith		1419	0.5	1	Zircon		1416	1
JE03-SH-1 Z2b	o	xenolith		1417	0.5	1	Zircon		1419	0.5
JE03-SH-1 Z3a	o	xenolith		1418	0.5	1	Zircon		1417	0.5
JE03-SH-1 Z3b	o	xenolith		1419	1	2	Zircon		1418	0.5
JE03-SH-1 Z4	o	xenolith		1417	2	4	Zircon		1419	1
KRM02-69			ui	1728	24.5	49	Zircon		1417	2
KRM02-69			li	1389	9	18	Zircon		1728	24.5
KTT02-01			ui	1649	13.5	27	Zircon		1389	9
KTT02-01			li	1382	10.5	21	Zircon		1649	13.5
KTT02-07			ui	1666	13.5	27	Zircon		1382	10.5
KTT02-07			li	1393	10.5	21	Zircon		1666	13.5
									1393	10.5
Condie et al., 1999									1406	6.5
sample #	core v outcrop	Plutonic v Volcanic	method	Age (Ma)	1 sigma +/-	2sig +/-	mineral		1704	2
GR-1	o	xenolith		1406	6.5	13	zircon		1412	10
GR-2	o	xenolith		1704	2	4	zircon		1440	1.5
MR-1A	o	xenolith		1412	10	20	zircon		1710	2
MR-5	o	xenolith		1440	1.5	3	zircon		1435	7.5
MR-9	o	xenolith		1710	2	4	zircon		1720	8.5
RM-3	o	xenolith		1435	7.5	15	zircon		1702	1
RM-4	o	xenolith		1720	8.5	17	zircon		1691	25
RM-17	o	xenolith		1702	1	2	zircon		1694	19.5
SR-1	o	xenolith		1691	25	50	zircon		1293	24
SR-3	o	xenolith		1694	19.5	39	zircon		1720	24
SR-5	o	xenolith		1293	24	48	zircon		1746	6.5
SR-5	o	xenolith		1720	24	48	zircon		1745	6
MT-6	o	xenolith		1746	6.5	13	zircon		1767	23
MT-7	o	xenolith		1745	6	12	zircon		1390	16.5
combined TH	o	xenolith		1767	23	46	zircon
combined TH	o	xenolith		1390	16.5	33	zircon

## Sheet: EC DZ
Groulier et al., 2018																					Extracted Age Data ± 1sigma
Table 4
Zircon (LA-ICP-MS) data from the quartzite (13-PA-2) collected in the lower part of the Port-aux-Quilles Formation. The U and Th contents corresponds to ap- proximate concentrations.																					Age (Ma)	±1sig
				Ratio							Age								Groulier et al., 2018		2754	9.5
	U	Th	U/Th	207Pb/		206Pb/		207Pb/			207Pb/		206Pb/		207Pb/						2754	10.5
Points	(ppm)	(ppm)		235U	2SE	238U	2SE	206Pb	2SE		235U	2SE	238U	2SE	206Pb	2SE	Conc.				2722	9
23_77	227	282	0.79	14.37	0.28	0.5379	0.0096	0.1914	0.0022		2769	18	2774	41	2754	19	1				2699	12.5
23_111	213	159	1.32	14.15	0.25	0.5336	0.0086	0.1914	0.0024		2756	17	2756	35	2754	21	1				2531	11
23_60	403	174	2.31	13.84	0.26	0.529	0.0094	0.1877	0.0021		2731	18	2736	40	2722	18	1				2531	9.5
23_89	89	266	0.33	13.56	0.25	0.5278	0.0094	0.1851	0.0028		2718	17	2727	40	2699	25	1				2533	11.5
23_52	197	126	1.56	11.03	0.22	0.4763	0.0081	0.1673	0.0022		2520	19	2510	36	2531	22	1				2479	12
21c_34	262	256	1.05	11.07	0.14	0.4778	0.0059	0.1673	0.0019		2526	12	2518	26	2531	19	1				2006	10
23_53	192	194	0.99	10.86	0.23	0.4716	0.009	0.1675	0.0023		2502	20	2485	39	2533	23	0.99				1980	11.5
21c_27	184	388	0.47	10.49	0.15	0.4683	0.0058	0.1622	0.0023		2475	14	2474	26	2479	24	1				1981	11.5
23_144	808	505	1.58	6.22	0.11	0.3657	0.0072	0.1234	0.0014		2005	16	2010	33	2006	20	1				1978	9.5
23_41	316	365	0.86	6.06	0.1	0.3605	0.0061	0.1216	0.0016		1981	14	1985	28	1980	23	1				1947	13.5
23_122	708	250	2.78	6.16	0.11	0.3658	0.0073	0.1217	0.0016		1994	15	2006	35	1981	23	1.01				1906	15.5
23_168	1153	1748	0.65	6.05	0.1	0.3612	0.0065	0.1215	0.0013		1982	14	1987	31	1978	19	1				1899	10
23_152	241	145	1.66	5.68	0.12	0.3473	0.0059	0.1194	0.0018		1925	18	1922	27	1947	27	1				1878	12
23_54	163	283	0.57	5.65	0.13	0.3495	0.0063	0.1167	0.002		1918	20	1932	31	1906	31	1.01				1886	8.5
23_108	534	528	0.99	5.588	0.098	0.347	0.0059	0.1162	0.0013		1909	15	1917	28	1899	20	1				1897	8.5
23_94	305	133	2.28	5.54	0.11	0.3462	0.0059	0.1149	0.0015		1901	16	1914	28	1878	24	1.01				1874	11
23_175	2440	858	2.83	5.465	0.08	0.3435	0.0048	0.1154	0.0011		1892	12	1902	23	1886	17	1.01				1872	11
23_18	674	374	1.81	5.38	0.088	0.3362	0.0052	0.1161	0.0011		1879	14	1866	25	1897	17	0.99				1858	10.5
23_179	566	301	1.88	5.255	0.08	0.3342	0.0054	0.1146	0.0014		1858	13	1856	26	1874	22	1				1859	11
23_174	537	370	1.45	5.395	0.083	0.3433	0.0054	0.1145	0.0014		1882	13	1900	26	1872	22	1.01				1850	13.5
23_119	932	795	1.18	5.254	0.078	0.3331	0.0053	0.1136	0.0013		1859	13	1851	25	1858	21	1				1834	10.5
23_97	648	242	2.65	5.375	0.095	0.3408	0.0063	0.1137	0.0014		1877	15	1887	30	1859	22	1.01				1829	13
23_140	333	195	1.7	5.234	0.096	0.3351	0.0055	0.1131	0.0017		1855	16	1861	27	1850	27	1				1832	12
23_37	420	250	1.68	5.06	0.1	0.326	0.0065	0.1121	0.0013		1824	17	1816	31	1834	21	1				1829	10.5
23_154	380	252	1.5	5.046	0.088	0.3277	0.0055	0.1118	0.0016		1823	14	1828	27	1829	26	1				1827	9.5
23_165	793	267	3.01	5.19	0.1	0.3346	0.0061	0.112	0.0015		1846	17	1858	29	1832	24	1.01				1819	12
23_118	763	200	3.82	5.168	0.092	0.3335	0.0056	0.1118	0.0013		1843	15	1856	27	1829	21	1.01				1827	11.5
23_15	315	219	1.45	5.148	0.083	0.335	0.0053	0.1117	0.0012		1844	14	1863	26	1827	19	1.01				1814	10.5
23_95	288	498	0.63	5.147	0.091	0.3328	0.0057	0.1112	0.0015		1840	15	1852	28	1819	24	1.01				1808	13
23_100	796	217	3.66	5.195	0.092	0.3344	0.0058	0.1117	0.0014		1847	15	1857	28	1827	23	1.01				1806	13
21_36	488	177	2.79	5.055	0.082	0.3285	0.0046	0.1109	0.0013		1825	14	1830	22	1814	21	1				1806	19
23_131	302	198	1.52	5.081	0.089	0.3317	0.005	0.1105	0.0016		1828	15	1845	24	1808	26	1.01				1799	13
23_160	855	370	2.29	4.94	0.095	0.3261	0.0068	0.1104	0.0016		1805	16	1816	33	1806	26	1.01				1786	11.5
23_150	105	99	1.05	5.03	0.12	0.3306	0.0053	0.1104	0.0023		1818	20	1839	25	1806	38	1.01				1796	13.5
23_92	241	121	1.95	4.921	0.093	0.3227	0.0053	0.11	0.0016		1802	16	1800	26	1799	26	1				1789	13.5
23_30	279	232	1.21	4.949	0.084	0.3264	0.0051	0.1092	0.0014		1808	14	1819	25	1786	23	1.01				1778	11.5
23_139	349	349	0.99	4.83	0.1	0.3165	0.0055	0.1098	0.0016		1783	17	1773	28	1796	27	0.99				1779	11.5
23_157	469	322	1.47	4.855	0.097	0.3241	0.006	0.1094	0.0016		1792	17	1807	29	1789	27	1.01				1769	10
21c_28	381	552	0.67	4.724	0.072	0.3151	0.0046	0.1087	0.0014		1768	13	1767	22	1778	23	1				1714	10.5
23_115	357	249	1.41	4.732	0.082	0.3148	0.0053	0.1088	0.0014		1770	14	1762	26	1779	23	1				1704	9.5
23_93	484	490	0.97	4.806	0.09	0.3208	0.0056	0.1082	0.0012		1781	16	1791	27	1769	20	1.01				1641	11
23_130	531	545	0.96	4.409	0.066	0.304	0.0042	0.105	0.0012		1712	12	1709	21	1714	21	1				1637	11
23_177	1224	198	6.38	4.323	0.07	0.3021	0.0044	0.1044	0.0011		1695	14	1700	22	1704	19	1				1633	12
23_48	706	540	1.31	4.054	0.071	0.2907	0.0048	0.1009	0.0012		1640	14	1643	24	1641	22	1				1633	13
23_31	456	373	1.24	4.142	0.072	0.2977	0.0048	0.1007	0.0012		1659	14	1678	24	1637	22	1.01				1622	13
21c_30	310	193	1.6	4.043	0.07	0.2909	0.0041	0.1005	0.0013		1641	14	1645	20	1633	24	1				1609	10.5
23_51	245	114	2.16	4.09	0.07	0.2946	0.0047	0.1005	0.0014		1650	14	1662	23	1633	26	1.01				1592	16
23_107	483	348	1.36	4.067	0.08	0.2937	0.0058	0.0999	0.0014		1643	16	1657	29	1622	26	1.01				1618	59
23_50	665	886	0.75	3.892	0.06	0.283	0.0039	0.0992	0.0011		1609	12	1605	19	1609	21	1				1577	14.5
21c_38	191	162	1.19	3.879	0.072	0.2855	0.0045	0.0983	0.0017		1604	15	1617	22	1592	32	1.01				1563	23
23_33	81	24	3.44	3.7	0.22	0.2772	0.0095	0.0997	0.0063		1568	47	1575	48	1618	118	1				1567	17.5
23_180	334	303	1.1	3.73	0.075	0.2782	0.0046	0.0975	0.0015		1572	16	1583	23	1577	29	1.01				1577	25
23_109	519	274	1.91	3.55	0.16	0.266	0.01	0.0968	0.0024		1532	35	1520	52	1563	46	0.99				1530	11
23_159	222	162	1.36	3.685	0.086	0.2764	0.0053	0.097	0.0018		1564	19	1571	27	1567	35	1				1532	13
23_181	100	80	1.27	3.61	0.1	0.2706	0.0051	0.0975	0.0026		1542	24	1541	26	1577	50	1				1542	16.5
21c_14	498	427	1.11	3.593	0.055	0.273	0.0035	0.0951	0.0011		1547	12	1555	18	1530	22	1.01				1522	16
23_27	627	291	2.12	3.437	0.065	0.2635	0.0047	0.0952	0.0013		1513	15	1505	24	1532	26	0.99				1519	8
23_163	308	176	1.73	3.566	0.076	0.2715	0.0052	0.0957	0.0017		1538	17	1546	26	1542	33	1.01				1518	9
23_167	660	422	1.56	3.626	0.091	0.276	0.006	0.0947	0.0016		1552	20	1569	30	1522	32	1.01				1528	18
23_11	1435	654	2.2	3.441	0.049	0.2641	0.0037	0.0945	0.0008		1511	11	1510	19	1519	16	1				1518	12
23_8	1583	953	1.65	3.457	0.05	0.2646	0.0036	0.0945	0.0009		1515	12	1512	19	1518	18	1				1526	14
23_56	172	106	1.62	3.557	0.091	0.2695	0.0051	0.095	0.0018		1531	20	1536	26	1528	36	1				1526	15
23_121	551	247	2.2	3.533	0.065	0.2701	0.0049	0.0945	0.0012		1532	14	1539	25	1518	24	1				1536	19.5
23_182	623	336	1.86	3.502	0.062	0.2693	0.0045	0.0949	0.0014		1524	14	1536	23	1526	28	1.01				1516	11
23_113	218	342	0.64	3.592	0.076	0.273	0.0046	0.0949	0.0015		1542	17	1554	23	1526	30	1.01				1520	12
23_38	101	59	1.74	3.473	0.082	0.266	0.0051	0.0954	0.002		1516	19	1518	26	1536	39	1				1518	11
23_136	1111	531	2.07	3.531	0.054	0.2709	0.0045	0.0944	0.0011		1533	12	1544	23	1516	22	1.01				1520	15
23_57	465	301	1.53	3.475	0.065	0.2652	0.0045	0.0946	0.0012		1517	15	1514	23	1520	24	1				1518	13
23_68	835	514	1.61	3.437	0.053	0.2635	0.0039	0.0945	0.0011		1510	12	1506	20	1518	22	1				1508	12
23_13	290	152	1.96	3.511	0.073	0.2706	0.0048	0.0946	0.0015		1527	17	1542	24	1520	30	1.01				1512	11
23_42	724	443	1.63	3.492	0.067	0.2675	0.0046	0.0945	0.0013		1521	15	1526	24	1518	26	1				1512	15
23_74	570	363	1.57	3.495	0.061	0.267	0.0042	0.094	0.0012		1522	14	1524	21	1508	24	1				1514	12
23_143	1320	665	1.99	3.517	0.06	0.27	0.0047	0.0942	0.0011		1527	14	1539	24	1512	22	1.01				1510	11
23_123	473	248	1.88	3.624	0.073	0.2762	0.0048	0.0942	0.0015		1554	16	1573	24	1512	30	1.01				1510	11
21c_13	660	266	2.42	3.49	0.052	0.2675	0.0033	0.0943	0.0012		1523	11	1529	17	1514	24	1				1508	12
21c_11	1008	554	1.9	3.555	0.045	0.2737	0.0031	0.0941	0.0011		1539	10	1559	16	1510	22	1.01				1520	20
23_106	883	432	2.03	3.492	0.057	0.2675	0.004	0.0941	0.0011		1525	13	1527	20	1510	22	1				1510	13
23_117	961	617	1.55	3.539	0.064	0.271	0.0045	0.094	0.0012		1533	14	1547	22	1508	24	1.01				1503	9.5
23_86	207	129	1.59	3.586	0.082	0.2739	0.0045	0.0946	0.002		1542	17	1559	23	1520	40	1.01				1498	17
23_79	616	390	1.58	3.521	0.074	0.2694	0.0054	0.0941	0.0013		1526	17	1535	27	1510	26	1.01				1508	9.5
23_40	1217	603	2.03	3.463	0.058	0.2664	0.0041	0.09375	0.00092		1515	13	1521	21	1503	19	1				1510	13
23_78	220	135	1.61	3.443	0.081	0.2662	0.0051	0.0935	0.0017		1511	20	1519	26	1498	34	1.01				1526	12
23_10	630	583	1.08	3.432	0.052	0.265	0.0037	0.09397	0.00096		1509	12	1514	19	1508	19	1				1522	12
23_155	570	299	1.9	3.434	0.061	0.2665	0.0042	0.0941	0.0013		1509	13	1521	21	1510	26	1.01				1508	10
23_36	605	332	1.84	3.428	0.068	0.2632	0.0051	0.0949	0.0012		1505	15	1503	26	1526	24	1				1504	12
23_166	856	651	1.31	3.399	0.066	0.261	0.0051	0.0947	0.0012		1500	15	1493	26	1522	24	1				1506	15
23_9	518	439	1.26	3.372	0.052	0.2606	0.0038	0.09399	0.00099		1495	12	1492	20	1508	20	1				1502	9.5
23_14	436	243	1.83	3.397	0.056	0.2629	0.0037	0.0938	0.0012		1502	13	1504	19	1504	24	1				1502	15
23_12	202	183	1.11	3.342	0.067	0.2587	0.0042	0.0939	0.0015		1486	16	1482	22	1506	30	1				1506	16
23_19	1428	641	2.26	3.393	0.058	0.2627	0.0041	0.0937	0.00093		1499	13	1502	21	1502	19	1				1498	12
23_72	302	165	1.84	3.444	0.071	0.2638	0.004	0.0937	0.0015		1509	16	1508	21	1502	30	1				1496	13
21c_15	238	185	1.28	3.411	0.068	0.2618	0.0033	0.0939	0.0016		1502	16	1498	17	1506	32	1				1502	16
21c_9	311	217	1.62	3.382	0.052	0.2617	0.0031	0.0935	0.0012		1497	12	1498	16	1498	24	1				1488	15.5
23_176	335	233	1.43	3.365	0.059	0.2628	0.0037	0.0934	0.0013		1494	14	1503	19	1496	26	1.01				1484	11
23_71	216	161	1.35	3.481	0.074	0.2672	0.0042	0.0937	0.0016		1517	17	1525	22	1502	32	1.01				1490	13
21c_19	258	150	1.68	3.394	0.062	0.2645	0.0032	0.093	0.0015		1499	14	1512	16	1488	31	1.01				1494	18.5
23_34	640	382	1.68	3.374	0.064	0.2624	0.0043	0.0928	0.0011		1493	15	1500	22	1484	22	1				1482	12.5
23_133	345	269	1.29	3.354	0.062	0.2608	0.004	0.0931	0.0013		1489	15	1493	20	1490	26	1				1472	10.5
23_162	230	97	2.28	3.348	0.078	0.2613	0.0055	0.0933	0.0018		1485	18	1494	28	1494	37	1.01				1476	13.5
21c_39	533	224	2.39	3.302	0.051	0.2593	0.0035	0.0927	0.0012		1481	12	1485	18	1482	25	1				1480	18.5
21c_35	1040	541	2.01	3.337	0.06	0.2609	0.0041	0.0922	0.001		1487	14	1493	21	1472	21	1				1472	14.5
21c_31	310	216	1.42	3.261	0.06	0.2561	0.0037	0.0924	0.0013		1469	14	1469	19	1476	27	1				1482	17.5
23_129	183	142	1.28	3.383	0.08	0.264	0.0043	0.0926	0.0018		1493	18	1509	22	1480	37	1.01				1469	16.5
23_75	406	203	1.98	3.301	0.062	0.2599	0.0046	0.0922	0.0014		1476	15	1488	24	1472	29	1.01				1175	22.5
23_132	188	177	1.06	3.418	0.08	0.265	0.0039	0.0927	0.0017		1501	18	1514	20	1482	35	1.01		Lasalle et al., 2013		1469.45	25.7664
23_138	353	256	1.36	3.238	0.065	0.2545	0.0042	0.0921	0.0016		1461	16	1460	22	1469	33	1				1526.88	22.82
23_26	507	31	22	2.152	0.07	0.195	0.0044	0.0791	0.0018		1161	23	1147	24	1175	45	0.99				1571.08	23.1233
																					1640.73	22.9946
Lasalle et al., 2013																					1645.32	7.97762
sample #	core v outcrop	metamorphic	method	Age (Ma)	1 sigma +/-	2sig +/-	mineral		Long	Lat	region										1645.69	22.0019
HJ60b			DZ	1469.45	25.7664	51.5328	zircon				eg										1657.2	15.4654
HJ60b			DZ	1526.88	22.82	45.6399	zircon				eg										1670.78	6.94162
HJ60b			DZ	1571.08	23.1233	46.2466	zircon				eg										1673.48	16.1979
HJ60b			DZ	1640.73	22.9946	45.9891	zircon				eg										1709.05	22.8467
HJ60b			DZ	1645.32	7.97762	15.9552	zircon				eg										1714.31	22.7664
HJ60b			DZ	1645.69	22.0019	44.0037	zircon				eg										1747.22	23.1262
HJ60b			DZ	1657.2	15.4654	30.9307	zircon				eg										1752.35	22.1931
HJ60b			DZ	1670.78	6.94162	13.8832	zircon				eg										1760.02	6.96347
HJ60b			DZ	1673.48	16.1979	32.3957	zircon				eg										1771.18	6.57431
HJ60b			DZ	1709.05	22.8467	45.6935	zircon				eg										1787.45	14.1729
HJ60b			DZ	1714.31	22.7664	45.5327	zircon				eg										1796.92	14.0829
HJ60b			DZ	1747.22	23.1262	46.2524	zircon				eg										1800.06	7.35725
HJ60b			DZ	1752.35	22.1931	44.3863	zircon				eg										1808.97	21.3648
HJ60b			DZ	1760.02	6.96347	13.9269	zircon				eg										1813.72	7.20804
HJ60b			DZ	1771.18	6.57431	13.1486	zircon				eg										1819.12	8.97738
HJ60b			DZ	1787.45	14.1729	28.3458	zircon				eg										1881.45	7.82541
HJ60b			DZ	1796.92	14.0829	28.1658	zircon				eg										1956.22	23.8065
HJ60b			DZ	1800.06	7.35725	14.7145	zircon				eg										2554.69	19.7316
HJ60b			DZ	1808.97	21.3648	42.7295	zircon				eg										2745.62	7.77152
HJ60b			DZ	1813.72	7.20804	14.4161	zircon				eg										1543.85	10.7916
HJ60b			DZ	1819.12	8.97738	17.9548	zircon				eg										1551.68	13.6636
HJ60b			DZ	1881.45	7.82541	15.6508	zircon				eg										1588.32	20.0021
HJ60b			DZ	1956.22	23.8065	47.613	zircon				eg										1611.01	23.4549
HJ60b			DZ	2554.69	19.7316	39.4631	zircon				eg										1646.24	20.161
HJ60b			DZ	2745.62	7.77152	15.543	zircon				eg										1649.9	23.7684
M1b			DZ	1543.85	10.7916	21.5833	zircon				eg										1684.24	22.3358
M1b			DZ	1551.68	13.6636	27.3272	zircon				eg										1693.15	23.9793
M1b			DZ	1588.32	20.0021	40.0042	zircon				eg										1700.24	23.8659
M1b			DZ	1611.01	23.4549	46.9099	zircon				eg										1709.05	18.4531
M1b			DZ	1646.24	20.161	40.3219	zircon				eg										1715.72	15.7465
M1b			DZ	1649.9	23.7684	47.5369	zircon				eg										1721.13	8.71641
M1b			DZ	1684.24	22.3358	44.6716	zircon				eg										1731.73	23.3678
M1b			DZ	1693.15	23.9793	47.9587	zircon				eg										1772.7	15.998
M1b			DZ	1700.24	23.8659	47.7317	zircon				eg										1782.1	7.19563
M1b			DZ	1709.05	18.4531	36.9063	zircon				eg										1796.09	14.0908
M1b			DZ	1715.72	15.7465	31.4931	zircon				eg										1797.25	13.2516
M1b			DZ	1721.13	8.71641	17.4328	zircon				eg										1804.36	16.4855
M1b			DZ	1731.73	23.3678	46.7356	zircon				eg										1804.85	18.128
M1b			DZ	1772.7	15.998	31.9961	zircon				eg										1814.22	14.7388
M1b			DZ	1782.1	7.19563	14.3913	zircon				eg										1854.12	18.3334
M1b			DZ	1796.09	14.0908	28.1815	zircon				eg										1891.74	17.8738
M1b			DZ	1797.25	13.2516	26.5031	zircon				eg										2470.38	9.41426
M1b			DZ	1804.36	16.4855	32.971	zircon				eg								van Breeman and Corriveau, 2005		1491	29
M1b			DZ	1804.85	18.128	36.256	zircon				eg										1516	30
M1b			DZ	1814.22	14.7388	29.4777	zircon				eg										1517	13
M1b			DZ	1854.12	18.3334	36.6668	zircon				eg										1536	24
M1b			DZ	1891.74	17.8738	35.7475	zircon				eg										1621	17
M1b			DZ	2470.38	9.41426	18.8285	zircon				eg										1668	18
																					1753	11
van Breeman and Corriveau, 2005																					1771	28
sample #	core v outcrop	metamorphic	method	Age (Ma)	1 sigma +/-	2sig +/-	mineral	% concordance	Long	Lat	region										1780	21
CQA-00-006	7004-82. 1		DZ	1491	29		zircon	99.6			cg										1789	16
	7004-88.1			1516	30		zircon	100.4			cg										1818	15
	7004-65.1			1517	13		zircon	100.2			cg										1822	32
	7004-82.2			1536	24		zircon	96.3			cg										1824	10
	7004-9. l			1621	17		zircon	97.2			cg										1855	22
	7004-4. J			1668	18		zircon	95.5			cg										1856	15
	7004-15.l			1753	11		zircon	99.5			cg										1860	25
	7004-79. l			1771	28		zircon	94.6			cg										1861	10
	7004-27.1			1780	21		zircon	97.3			cg										1867	18
	7004-1 4.J			1789	16		zircon	99			cg										1884	34
	7004-1.1			1818	15		zircon	99.l			cg										1884	20
	7004-58.J			1822	32		zircon	96			cg										1906	18
	7004-19.J			1824	10		zircon	99			cg										1925	14
	7004-105.1			1855	22		zircon	99.8			cg										1934	44
	7004-16.1			1856	15		zircon	97.2			cg										1950	21
	7004-8. l			1860	25		zircon	99			cg										1954	22
	7004-25.l			1861	10		zircon	99.7			cg										2030	17
	7004-21 . J			1867	18		zircon	99.2			cg										2042	25
	7004-24. J			1884	34		zircon	99.2			cg										2098	36
	7004-104. l			1884	20		zircon	97.3			cg										2301	17
	7004-22.l			1906	18		zircon	97.5			cg										2368	44
	7004-30.1			1925	14		zircon	101.2			cg										2463	33
	7004-10.1			1934	44		zircon	96			cg										2516	24
	7004-26. l			1950	21		zircon	95.6			cg										2647	25
	7004-20.1			1954	22		zircon	93.7			cg										2744	15
	7004- 17.1			2030	17		zircon	96.9			cg										2861	18
	7004-6.l			2042	25		zircon	98.9			cg										2935	15
	7004-13. l			2098	36		zircon	98.9			cg								Davis et al., 2010		1491	10.5
	7004-3. J			2301	17		zircon	96.9			cg										1540	11
	7004-28. J			2368	44		zircon	95			cg										1657	13
	7004-5.l			2463	33		zircon	98.6			cg										1668	10.5
	7004-63.1			2516	24		zircon	99.8			cg										1724	10.5
	7004-23. J			2647	25		zircon	97.3			cg										1732	10.5
	7004-10 3. J			2744	15		zircon	96.7			cg										1754	10
	7004-89.1			2861	18		zircon	97.3			cg										1762	10
	7004-60.l			2935	15		zircon	97			cg										1762	13
																					1787	10
David et al., 2010																					1792	10
Rapports isotopiques										Age (Ma)											1807	10.5
No	No analyse	2ospb	2o•pb	2ospbi23'U	±2s	201pbJ235U	±2s	201Pbi2ospb	±2s	2oop bJ238U	±2s	201Pbi2'su	±2s	201pbJ206Pb	±2s	Disc.					1820	10
		(cps)	(cps)													(%)					1822	10.5
1	Grenville-50	444765	157	0,182	0,006	1783	0,059	0,071	0,001	1076	30	1039	21	963	25	-1,3					1824	10
2	Grenville-29	418758	113	0,179	0,005	1776	0,058	0,072	0,001	1059	30	1037	21	989	24	-5,8					1831	10
3	Grenville-?	496950	136	0,180	0,006	1801	0,059	0,072	0,001	1070	30	1046	21	996	24	7,2					1833	10
4	Grenville-57	570019	144	0,184	0,006	1846	0,060	0,073	0,001	1090	31	1062	21	1005	24	-0,9					1839	10
5	Grenville-10	366195	101	0,181	0,006	1824	0,060	0,073	0,001	1075	30	1054	21	1012	24	-0,2					1857	10
6	Grenville-40	660416	189	0,180	0,006	1818	0,060	0,073	0,001	1067	30	1052	21	1021	24	3,7					1864	10
7	Grenville-59	706294	164	0,182	0,006	1847	0,060	0,074	0,001	1078	30	1062	21	1030	24	-8,0					1874	10
8	Grenville-9	781487	137	0,180	0,005	1833	0,060	0,074	0,001	1065	30	1057	21	1043	23	-3,9					1881	10
9	Grenville-45	703295	137	0,179	0,005	1833	0,060	0,074	0,001	1062	30	1057	21	1047	23	-2,3					1884	9.5
10	Grenville-14	597348	291	0,177	0,005	1823	0,063	0,075	0,001	1050	30	1054	23	1063	33	-6,7					1899	10
11	Grenville-22	469281	168	0,262	0,008	3275	0,107	0,091	0,001	1502	41	1475	25	1437	22	1,4					1926	10
12	Grenville-43	544111	164	0,273	0,008	3505	0,113	0,093	0,001	1556	42	1528	25	1491	21	3,0					1950	9.5
13	Grenville-35	241482	165	0,294	0,009	3870	0,126	0,096	0,001	1660	44	1607	26	1540	22	1,4					1955	10.5
14	Grenville-56	81697	121	0,355	0,011	4990	0,166	0,102	0,001	1961	51	1818	28	1657	26	1,3					2004	9.5
15	Grenville-58	412938	153	0,296	0,009	4183	0,135	0,102	0,001	1673	44	1671	26	1668	21	0,7					2014	11.5
16	Grenville-51	383795	201	0,287	0,009	4176	0,135	0,106	0,001	1626	43	1669	26	1724	21	5,2					2223	10
17	Grenville-53	239609	154	0,320	0,010	4683	0,152	0,106	0,001	1791	47	1764	27	1732	21	7,4					2237	10
18	Grenville-46	395134	118	0,328	0,010	4846	0,156	0,107	0,001	1827	48	1793	27	1754	20	0,4					2267	12
19	Grenville-16	590368	73	0,298	0,009	4427	0,143	0,108	0,001	1681	45	1717	26	1762	20	8,7					2437	9
20	Grenville-31	146468	132	0,336	0,010	4994	0,167	0,108	0,002	1868	49	1818	28	1762	26	7,9					2478	10
21	Grenville-49	1195114	168	0,307	0,009	4629	0,149	0,109	0,001	1727	46	1754	27	1787	20	0,9					2527	9
22	Grenville-47	316334	171	0,330	0,010	4986	0,161	0,110	0,001	1839	48	1817	27	1792	20	-5,1					2633	8.5
23	Grenville-54	199757	140	0,332	0,010	5056	0,163	0,110	0,001	1847	48	1829	27	1807	21	3,7					2649	8.5
24	Grenville-42	318649	103	0,331	0,010	5082	0,164	0,111	0,001	1845	48	1833	27	1820	20	-1,2					2676	8.5
25	Grenville-2	165863	90	0,345	0,011	5304	0,173	0,111	0,001	1913	50	1870	27	1822	21	6,4					2688	9
26	Grenville-23	531497	120	0,315	0,010	4841	0,155	0,112	0,001	1765	47	1792	27	1824	20	-6,5					2695	8.5
27	Grenville-15	260308	80	0,326	0,010	5038	0,162	0,112	0,001	1821	48	1826	27	1831	20	2,5					2743	8.5
28	Grenville-37	240401	97	0,323	0,010	4991	0,161	0,112	0,001	1805	47	1818	27	1833	20	3,3					2759	9
29	Grenville-18	224364	100	0,329	0,010	5100	0,166	0,112	0,001	1833	49	1836	27	1839	20	-7,7					2770	8.5
30	Grenville-27	454634	129	0,325	0,010	5094	0,164	0,114	0,001	1816	48	1835	27	1857	20	6,4					2782	8.5
31	Grenville-1	249583	77	0,340	0,010	5343	0,172	0,114	0,001	1886	49	1876	27	1864	20	-7,0					2783	8.5
32	Grenville-38	287235	131	0,341	0,010	5394	0,174	0,115	0,001	1893	50	1884	27	1874	20	5,8					2826	8.5
33	Grenville-32	687407	135	0,319	0,010	5063	0,163	0,115	0,001	1786	47	1830	27	1881	20	3,1					2954	8.5
34	Grenville-36	756834	149	0,330	0,010	5240	0,168	0,115	0,001	1837	48	1859	27	1884	19	8,3					3114	8.5
35	Grenville-11	199798	91	0,338	0,010	5415	0,176	0,116	0,001	1877	49	1887	27	1899	20	-8,8					3249	8
36	Grenville-30	729841	88	0,326	0,010	5302	0,171	0,118	0,001	1818	48	1869	27	1926	20	2,9
37	Grenville-33	486069	138	0,342	0,010	5644	0,182	0,120	0,001	1898	50	1923	27	1950	19	1,8
38	Grenville-25	584674	110	0,332	0,010	5488	0,180	0,120	0,001	1847	49	1899	28	1955	21	-1,1
39	Grenville-4	185673	60	0,368	0,011	6255	0,202	0,123	0,001	2020	52	2012	28	2004	19	20,2
40	Grenville-6	706536	107	0,353	0,011	6032	0,201	0,124	0,002	1949	51	1980	29	2014	23	-4,9
41	Grenville-5	71007	96	0,412	0,013	7944	0,259	0,140	0,002	2226	57	2225	29	2223	20	4,2
42	Grenville-26	105054	132	0,442	0,013	8575	0,279	0,141	0,002	2358	60	2294	29	2237	20	-1,5
43	Grenville-44	43019	130	0,473	0,014	9335	0,313	0,143	0,002	2495	63	2371	30	2267	24	-4,9
44	Grenville-19	972755	108	0,419	0,013	9154	0,293	0,158	0,002	2258	57	2354	29	2437	18	-12,1
45	Grenville-41	391760	114	0,449	0,014	10043	0,332	0,162	0,002	2392	61	2439	30	2478	20	-1,6
46	Grenville-13	187663	67	0,473	0,014	10896	0,350	0,167	0,002	2499	63	2514	29	2527	18	-4,8
47	Grenville-8	266523	118	0,524	0,016	12851	0,412	0,178	0,002	2717	67	2669	30	2633	17	-3,1
48	Grenville-34	325865	133	0,466	0,014	11546	0,370	0,180	0,002	2467	62	2568	30	2649	17	9,9
49	Grenville-48	1057035	189	0,464	0,014	11669	0,373	0,182	0,002	2456	61	2578	29	2676	17	3,8
50	Grenville-17	836050	159	0,479	0,015	12144	0,391	0,184	0,002	2523	63	2616	30	2688	18	-12,7
51	Grenville-3	341499	68	0,482	0,015	12256	0,391	0,185	0,002	2534	63	2624	30	2695	17	6,4
52	Grenville-52	190292	179	0,530	0,016	13901	0,444	0,190	0,002	2743	67	2743	30	2743	17	0,0
53	Grenville-28	149652	89	0,517	0,016	13669	0,441	0,192	0,002	2685	66	2727	30	2759	18	-3,9
54	Grenville-12	264516	52	0,520	0,016	13865	0,442	0,193	0,002	2701	66	2741	30	2770	17	-2,5
55	Grenville-55	369755	148	0,488	0,015	13107	0,418	0,195	0,002	2563	63	2687	30	2782	17	9,5
56	Grenville-60	1514511	178	0,499	0,015	13412	0,430	0,195	0,002	2612	65	2709	30	2783	17	-21,2
57	Grenville-21	178340	90	0,545	0,016	15036	0,478	0,200	0,002	2806	68	2818	30	2826	17	-9,2
58	Grenville-20	402577	101	0,535	0,016	15971	0,509	0,216	0,002	2764	67	2875	30	2954	17	-0,3
59	Grenville-39	395303	189	0,496	0,015	16341	0,525	0,239	0,003	2596	65	2897	30	3114	17	-5,1
60	Grenville-24	175172	91	0,663	0,020	23817	0,761	0,260	0,003	3280	77	3261	31	3249	16	7,5

## Sheet: MC DZ
Medaris et al, 2021
				Table 3 La-MC-ICPMS U-Pb Isotope Data for detrital zircons (University of Arizona laboratory)
Spot	U	206Pb	U/Th	206Pb*	±	207Pb*	±	206Pb*	±	error	206Pb*	±	207Pb*	±	206Pb*	±	Best age	±	Conc
	(ppm)	204Pb		207Pb*	(%)	235U*	(%)	238U	(%)	corr.	238U*	(Ma)	235U	(Ma)	207Pb*	(Ma)	(Ma)	(Ma)	(%)
Waterloo quartzite, Hubbleton locality, Sample 07ES15 (43.1950º N, 88.91542º W)																					Age (Ma)	±1sig
26	198.931	50016	3.40216	9.56927	0.83279	4.49546	2.44211	0.312134	2.29573	0.940059	1751.2	35.2051	1730.13	20.2872	1705.53	15.3304	1705.53	15.3304	102.677		1705.53	7.6652
63	81.5539	29926.3	1.86471	9.56058	0.868244	4.43756	2.39183	0.307834	2.22867	0.931787	1730.04	33.8168	1719.38	19.8224	1707.21	15.9798	1707.21	15.9798	101.337		1707.21	7.98989
45	49.9508	69239.9	1.67607	9.55353	0.861624	4.35586	2.30984	0.301944	2.14312	0.927822	1700.94	32.0407	1704.01	19.0769	1708.56	15.8552	1708.56	15.8552	99.5537		1708.56	7.92761
86	68.6644	10819.9	2.91193	9.54457	1.03523	4.39325	2.47905	0.304249	2.25255	0.908635	1712.35	33.8739	1711.07	20.5073	1710.29	19.0462	1710.29	19.0462	100.12		1710.29	9.5231
71	112.412	184715	2.86943	9.52402	1.04854	4.48677	2.84295	0.310057	2.64252	0.9295	1740.99	40.3175	1728.53	23.6099	1714.26	19.2816	1714.26	19.2816	101.559		1714.26	9.64078
26	64.4894	121259	0.942612	9.51984	0.99265	4.39407	2.28198	0.303518	2.05477	0.900433	1708.73	30.8426	1711.22	18.8774	1715.06	18.2517	1715.06	18.2517	99.6307		1715.06	9.12586
50	81.6287	23430.1	2.83365	9.47605	0.836194	4.37655	2.21199	0.300917	2.04785	0.925794	1695.85	30.5363	1707.92	18.2847	1723.54	15.36	1723.54	15.36	98.3938		1723.54	7.67999
28	170.008	60464.1	0.817014	9.45368	0.865632	4.58032	2.3943	0.314184	2.23235	0.932357	1761.26	34.4042	1745.69	19.9573	1727.88	15.8903	1727.88	15.8903	101.932		1727.88	7.94514
6	82.8151	25787.6	1.92495	9.44338	1.12625	4.43919	2.62036	0.304172	2.36598	0.902921	1711.96	35.5728	1719.68	21.7184	1729.88	20.6701	1729.88	20.6701	98.9643		1729.88	10.335
39	63.9673	44750	0.849335	9.39478	0.85219	4.6598	2.64639	0.317645	2.50543	0.946733	1778.22	38.9358	1760.05	22.1268	1739.34	15.6211	1739.34	15.6211	102.235		1739.34	7.81054
74	121.802	96572	0.720006	9.38017	0.808106	4.53084	2.52589	0.308374	2.39313	0.947441	1732.7	36.3609	1736.65	21.0133	1742.19	14.8076	1742.19	14.8076	99.4551		1742.19	7.40381
59	205.549	96814.1	1.14601	9.34455	0.871151	4.43268	2.1209	0.300547	1.93373	0.91175	1694.02	28.8074	1718.47	17.573	1749.16	15.9492	1749.16	15.9492	96.8476		1749.16	7.97458
31	257.061	928879	2.04506	9.33079	0.668224	4.5796	1.98074	0.310051	1.86462	0.941375	1740.96	28.4482	1745.56	16.5089	1751.86	12.2293	1751.86	12.2293	99.3777		1751.86	6.11467
35	98.9903	29739.2	2.53669	9.27376	0.961226	4.63638	2.40863	0.311977	2.20852	0.916918	1750.43	33.8548	1755.84	20.1204	1763.07	17.568	1763.07	17.568	99.2827		1763.07	8.78402
28	290.124	33423.6	1.24584	9.22139	0.958632	4.16096	2.50942	0.278406	2.3191	0.924157	1583.33	32.5575	1666.37	20.5459	1773.42	17.4982	1773.42	17.4982	89.2812		1773.42	8.74909
11	16.9227	4374.96	1.20044	9.20458	1.90204	4.74912	3.397	0.317179	2.81458	0.828549	1775.94	43.6917	1775.95	28.5004	1776.75	34.7084	1776.75	34.7084	99.9545		1776.75	17.3542
85	34.4223	66531.2	0.789693	9.17267	1.08285	4.79498	2.96158	0.319132	2.75652	0.930759	1785.49	42.99	1784.02	24.8871	1783.08	19.7424	1783.08	19.7424	100.135		1783.08	9.87119
53	967.722	145559	3.27172	9.1554	0.97223	5.0823	2.16851	0.337618	1.93835	0.893863	1875.2	31.5389	1833.16	18.4005	1786.51	17.7178	1786.51	17.7178	104.964		1786.51	8.85888
80	75.3228	21259.7	1.24121	9.06204	0.930555	5.07258	2.73615	0.333536	2.57305	0.940391	1855.5	41.4869	1831.53	23.2114	1805.17	16.9193	1805.17	16.9193	102.788		1805.17	8.45963
27	82.354	36219.3	1.68563	9.04857	1.00181	4.90008	2.799	0.321715	2.61358	0.933754	1798.1	41.0103	1802.27	23.6078	1807.88	18.2089	1807.88	18.2089	99.4592		1807.88	9.10447
83	93.0271	33941.3	3.27223	9.03581	0.873364	5.05411	2.68393	0.331359	2.53785	0.945575	1844.97	40.7188	1828.44	22.7545	1810.44	15.869	1810.44	15.869	101.907		1810.44	7.9345
76	244.285	198705	2.86389	9.024	0.902582	5.02717	2.66914	0.329162	2.5119	0.941091	1834.32	40.1013	1823.91	22.6091	1812.82	16.3952	1812.82	16.3952	101.186		1812.82	8.19761
39	440.683	42949	2.77443	8.99059	0.861916	4.88724	1.69957	0.318816	1.4648	0.861865	1783.94	22.8273	1800.06	14.3268	1819.55	15.6435	1819.55	15.6435	98.0431		1819.55	7.82177
64	237.232	659971	1.70893	8.97882	0.99447	5.14118	2.84392	0.334942	2.66438	0.936868	1862.29	43.0951	1842.94	24.1791	1821.93	18.0445	1821.93	18.0445	102.215		1821.93	9.02225
65	37.4952	11621.6	2.37803	8.95391	1.04593	5.06495	2.80017	0.32906	2.5975	0.927621	1833.82	41.4582	1830.25	23.7488	1826.97	18.9666	1826.97	18.9666	100.375		1826.97	9.48332
48	322.895	54129.3	10.8449	8.93605	0.778203	5.01558	1.77912	0.325203	1.5999	0.899263	1815.09	25.3096	1821.96	15.063	1830.59	14.105	1830.59	14.105	99.1534		1830.59	7.05248
5	293.951	69722.4	8.67344	8.91669	0.929015	4.73386	2.59677	0.306272	2.42491	0.933815	1722.33	36.6514	1773.25	21.772	1834.52	16.8327	1834.52	16.8327	93.8848		1834.52	8.41635
95	151.704	108465	1.06593	8.91355	0.869583	5.25481	2.59974	0.339857	2.44999	0.9424	1885.98	40.0614	1861.55	22.1805	1835.15	15.7546	1835.15	15.7546	102.77		1835.15	7.8773
13	200.1	89251.4	14.6591	8.91104	1.02274	5.05434	3.30771	0.326799	3.14562	0.950998	1822.85	49.9469	1828.48	28.0456	1835.67	18.5264	1835.67	18.5264	99.3017		1835.67	9.26321
46	98.1234	52028.8	1.5848	8.90189	0.932772	5.07855	2.69551	0.328027	2.52898	0.938218	1828.81	40.2691	1832.53	22.871	1837.53	16.8927	1837.53	16.8927	99.5258		1837.53	8.44633
23	99.4879	30862.3	1.771	8.892	0.767625	5.26455	2.14792	0.339663	2.00607	0.933959	1885.05	32.7884	1863.13	18.3301	1839.54	13.8999	1839.54	13.8999	102.474		1839.54	6.94994
30	278.554	64829.3	3.8545	8.8859	0.889173	4.28927	3.67418	0.276549	3.56496	0.970275	1573.96	49.7871	1691.3	30.2626	1840.78	16.0966	1840.78	16.0966	85.505		1840.78	8.0483
20	168.633	15097.5	2.71974	8.88236	0.924131	4.64934	3.18816	0.299645	3.05129	0.957068	1689.55	45.3515	1758.17	26.648	1841.5	16.7281	1841.5	16.7281	91.7483		1841.5	8.36404
36	134.118	22015.1	2.58014	8.86225	1.05651	5.21254	2.42036	0.335182	2.1776	0.899701	1863.45	35.2405	1854.67	20.6229	1845.61	19.1151	1845.61	19.1151	100.967		1845.61	9.55757
56	60.324	35341.3	3.41279	8.86127	1.08348	5.13136	3.1091	0.329926	2.9142	0.937313	1838.02	46.6051	1841.31	26.4264	1845.81	19.6029	1845.81	19.6029	99.5783		1845.81	9.80143
94	125.585	19965.3	1.91134	8.85719	0.786687	5.23431	2.14386	0.33639	1.99431	0.930241	1869.28	32.3611	1858.22	18.2787	1846.64	14.2309	1846.64	14.2309	101.226		1846.64	7.11545
10	200.679	37738.6	3.48965	8.83957	0.917446	5.21351	3.16159	0.334387	3.02555	0.956971	1859.61	48.8763	1854.83	26.9421	1850.24	16.5895	1850.24	16.5895	100.506		1850.24	8.29474
89	169.269	37742.6	2.8614	8.816	0.879124	5.13677	2.67237	0.328586	2.52363	0.944341	1831.52	40.2354	1842.21	22.7169	1855.07	15.8871	1855.07	15.8871	98.731		1855.07	7.94357
57	159.474	1.66422e+07	2.11275	8.80713	1.03598	5.16794	2.90262	0.330248	2.71144	0.934138	1839.58	43.3943	1847.35	24.6992	1856.88	18.7181	1856.88	18.7181	99.0682		1856.88	9.35905
99	235.819	77341.4	4.07175	8.80469	0.850521	5.32973	2.46044	0.340492	2.30876	0.938353	1889.04	37.8046	1873.64	21.039	1857.38	15.3659	1857.38	15.3659	101.704		1857.38	7.68293
12	167.079	1.14633e+06	1.32432	8.80292	0.868582	5.16026	2.68102	0.329599	2.53643	0.946066	1836.44	40.5333	1846.09	22.8074	1857.75	15.6915	1857.75	15.6915	98.853		1857.75	7.84576
78	159.061	191056	1.3695	8.79618	0.784809	5.32424	2.09638	0.339812	1.94393	0.927282	1885.77	31.7833	1872.76	17.9223	1859.13	14.1755	1859.13	14.1755	101.433		1859.13	7.08776
19	357.078	51281.2	2.42978	8.79362	0.790368	5.13053	2.26603	0.327354	2.12372	0.937201	1825.54	33.7638	1841.17	19.258	1859.66	14.275	1859.66	14.275	98.1655		1859.66	7.13751
36	192.578	33007.5	0.875221	8.79273	0.894723	4.76897	2.94784	0.304254	2.80878	0.952826	1712.37	42.2392	1779.45	24.7484	1859.84	16.1598	1859.84	16.1598	92.0708		1859.84	8.07989
87	87.4338	45409.9	1.71979	8.78513	0.977616	5.12643	2.73323	0.326777	2.55241	0.933845	1822.74	40.5254	1840.5	23.2268	1861.4	17.6538	1861.4	17.6538	97.9229		1861.4	8.82692
40	301.558	495011	1.71036	8.74481	0.824108	5.17375	2.49976	0.328279	2.36001	0.944095	1830.04	37.6003	1848.31	21.274	1869.71	14.8684	1869.71	14.8684	97.8783		1869.71	7.4342
96	288.179	65693.1	2.91994	8.73054	0.871052	5.2206	2.49105	0.330711	2.33379	0.936872	1841.83	37.3895	1855.98	21.2306	1872.65	15.7098	1872.65	15.7098	98.354		1872.65	7.8549
13	171.012	80844.3	1.39767	8.7226	0.959483	5.51354	3.08421	0.348951	2.93116	0.950379	1929.59	48.8804	1902.71	26.5146	1874.29	17.2994	1874.29	17.2994	102.95		1874.29	8.6497
51	91.1634	17036.8	1.10846	8.70882	0.867264	5.45355	2.38139	0.344609	2.21785	0.931327	1908.8	36.6426	1893.31	20.4362	1877.14	15.6311	1877.14	15.6311	101.687		1877.14	7.81554
84	173.966	166517	0.842892	8.68877	0.868048	5.46493	2.47937	0.344533	2.32245	0.936709	1908.44	38.3644	1895.1	21.2841	1881.3	15.6374	1881.3	15.6374	101.443		1881.3	7.81871
106	136.353	332933	1.40532	8.65671	0.918866	5.4896	2.43202	0.344811	2.25176	0.925879	1909.77	37.219	1898.97	20.892	1887.95	16.5398	1887.95	16.5398	101.156		1887.95	8.26992
31	204.152	403595	3.81018	8.65527	0.876196	5.56061	2.7895	0.349214	2.64832	0.949388	1930.84	44.1882	1910.02	24.0113	1888.25	15.7711	1888.25	15.7711	102.255		1888.25	7.88554
67	127.273	307586	2.91273	8.65082	0.905449	5.51103	2.43889	0.345922	2.26458	0.928531	1915.1	37.5206	1902.32	20.9636	1889.18	16.2959	1889.18	16.2959	101.372		1889.18	8.14795
68	159.45	57289.9	2.25997	8.61289	1.01838	5.56608	2.88583	0.347845	2.70017	0.935665	1924.3	44.9224	1910.87	24.8445	1897.08	18.3114	1897.08	18.3114	101.435		1897.08	9.15572
17	181.491	123678	2.98669	8.60797	0.848043	5.29527	2.16403	0.330732	1.99094	0.920016	1841.93	31.8982	1868.1	18.4848	1898.11	15.2463	1898.11	15.2463	97.0404		1898.11	7.62315
25	230.159	16074.2	0.266099	8.60735	0.905048	5.10231	2.47745	0.318658	2.30622	0.930884	1783.17	35.9265	1836.49	21.0363	1898.24	16.2711	1898.24	16.2711	93.9383		1898.24	8.13553
42	130.89	38705.5	5.22734	8.60668	0.878028	5.54413	2.64761	0.346223	2.49778	0.943409	1916.54	41.4111	1907.47	22.7792	1898.38	15.785	1898.38	15.785	100.957		1898.38	7.89248
48	83.0567	96964.6	1.80819	8.59218	0.974799	5.5242	2.92522	0.344398	2.75802	0.942842	1907.79	45.5466	1904.37	25.1547	1901.41	17.5186	1901.41	17.5186	100.336		1901.41	8.75931
30	154.759	57575.8	31.2863	8.59001	0.88052	5.67322	3.02183	0.353599	2.8907	0.956606	1951.76	48.68	1927.3	26.091	1901.86	15.8232	1901.86	15.8232	102.624		1901.86	7.91159
108	103.034	46831.6	1.66883	8.58515	0.91538	5.34988	2.69697	0.333257	2.53687	0.940638	1854.15	40.8779	1876.87	23.0759	1902.88	16.4477	1902.88	16.4477	97.4393		1902.88	8.22386
88	163.768	199149	2.8287	8.56968	0.930812	5.57048	2.5664	0.346373	2.39165	0.931909	1917.26	39.6643	1911.55	22.0962	1906.12	16.7186	1906.12	16.7186	100.584		1906.12	8.3593
61	97.9287	30964.6	2.70342	8.54503	0.860926	5.49131	2.35165	0.340469	2.18839	0.930577	1888.92	35.8317	1899.24	20.2024	1911.29	15.4555	1911.29	15.4555	98.8297		1911.29	7.72777
38	187.359	104611	2.37938	8.52558	0.903073	5.09301	2.4506	0.315055	2.27814	0.929624	1765.53	35.184	1834.94	20.8021	1915.38	16.2024	1915.38	16.2024	92.1765		1915.38	8.10118
19	224.436	47992.5	4.01898	8.52225	0.713969	5.5556	2.1428	0.343537	2.02036	0.942858	1903.66	33.3022	1909.24	18.4407	1916.08	12.8079	1916.08	12.8079	99.3516		1916.08	6.40397
16	299.975	29208.1	3.62737	8.52076	1.02512	4.6108	3.47787	0.285064	3.32335	0.955573	1616.82	47.5248	1751.22	29.0277	1916.4	18.3903	1916.4	18.3903	84.3675		1916.4	9.19514
37	29.7667	27135.4	0.747477	8.5147	1.03904	5.58319	2.69287	0.344937	2.48433	0.922561	1910.38	41.0745	1913.51	23.1935	1917.67	18.6372	1917.67	18.6372	99.6195		1917.67	9.31861
70	76.8613	46746.6	0.967669	8.49555	0.844494	5.56385	2.4184	0.342969	2.26616	0.93705	1900.94	37.308	1910.52	20.8178	1921.71	15.1398	1921.71	15.1398	98.9189		1921.71	7.56991
102	151.449	169906	1.41549	8.49295	0.902999	5.59583	3.04054	0.344835	2.90336	0.954882	1909.89	47.9921	1915.46	26.1983	1922.26	16.1878	1922.26	16.1878	99.3564		1922.26	8.09391
107	734.493	161333	1.71198	8.49072	0.780369	5.49453	2.60465	0.338503	2.485	0.954063	1879.46	40.5129	1899.74	22.3786	1922.73	13.9883	1922.73	13.9883	97.7497		1922.73	6.99417
2	210.061	1.10299e+06	3.18794	8.48853	1.11812	5.43192	3.15213	0.33456	2.94715	0.934973	1860.45	47.6283	1889.91	27.0364	1923.19	20.0428	1923.19	20.0428	96.7374		1923.19	10.0214
22	147.945	32088.3	0.720188	8.48551	0.815365	5.70665	2.30094	0.351355	2.15162	0.935108	1941.07	36.0634	1932.37	19.8823	1923.83	14.6139	1923.83	14.6139	100.896		1923.83	7.30693
3	639.795	494404	0.98214	8.4819	0.927414	5.97119	2.19928	0.367486	1.99417	0.90674	2017.56	34.5465	1971.66	19.13	1924.59	16.621	1924.59	16.621	104.831		1924.59	8.31049
14	113.568	162749	0.799451	8.48178	1.04323	5.43891	2.73429	0.334724	2.52745	0.924353	1861.24	40.8603	1891.01	23.4558	1924.62	18.697	1924.62	18.697	96.7067		1924.62	9.34849
29	303.023	37370.4	2.34791	8.48155	0.956619	5.51912	2.34559	0.339651	2.14165	0.913054	1884.99	35.0035	1903.58	20.166	1924.67	17.1443	1924.67	17.1443	97.9384		1924.67	8.57216
35	54.856	13312.5	0.717765	8.47234	1.01653	5.84492	2.68171	0.35931	2.48157	0.925371	1978.9	42.2866	1953.1	23.2556	1926.62	18.2141	1926.62	18.2141	102.714		1926.62	9.10705
45	28.0273	33424.9	4.3115	8.4584	0.909345	5.68657	2.39903	0.349001	2.22001	0.925377	1929.83	37.0247	1929.33	20.7192	1929.56	16.2875	1929.56	16.2875	100.014		1929.56	8.14376
3	142.488	93059.9	1.5446	8.4411	1.04217	5.65792	2.7838	0.346533	2.58136	0.92728	1918.02	42.8254	1924.97	24.0252	1933.23	18.6589	1933.23	18.6589	99.2134		1933.23	9.32943
55	221.47	77059.7	1.97754	8.38531	0.994474	5.73258	3.38352	0.348784	3.23407	0.955831	1928.79	53.9128	1936.29	29.2608	1945.09	17.7819	1945.09	17.7819	99.1619		1945.09	8.89095
69	57.7585	19638.2	0.747351	8.38054	1.02035	5.77793	3.14527	0.351343	2.97517	0.945917	1941.01	49.866	1943.11	27.2313	1946.11	18.2404	1946.11	18.2404	99.7379		1946.11	9.12019
34	364.629	99479	0.941011	8.3768	0.795226	5.31657	2.23671	0.323145	2.09057	0.934663	1805.07	32.9137	1871.53	19.1179	1946.91	14.216	1946.91	14.216	92.7147		1946.91	7.10801
90	43.0896	9.47691e+07	1.82177	8.3735	1.05144	5.65616	2.96541	0.34365	2.77274	0.93503	1904.21	45.7157	1924.7	25.592	1947.61	18.793	1947.61	18.793	97.7713		1947.61	9.39649
18	171.502	64806	1.78329	8.36977	0.965683	5.69146	2.81177	0.345641	2.64074	0.939174	1913.75	43.7267	1930.07	24.2882	1948.41	17.2583	1948.41	17.2583	98.2212		1948.41	8.62914
104	100.887	36950.3	1.71022	8.3645	0.926411	6.14897	2.47221	0.37319	2.29208	0.927134	2044.39	40.1561	1997.23	21.5944	1949.54	16.5541	1949.54	16.5541	104.866		1949.54	8.27706
98	218.436	111393	0.568656	8.35655	1.03818	5.71765	2.975	0.346683	2.78798	0.937135	1918.74	46.2682	1934.04	25.7164	1951.23	18.548	1951.23	18.548	98.3348		1951.23	9.274
37	242.809	302129	1.38057	8.35058	0.773112	5.6403	2.57847	0.341748	2.45984	0.953992	1895.07	40.3893	1922.28	22.2421	1952.51	13.8095	1952.51	13.8095	97.0584		1952.51	6.90476
41	304.229	136878	2.28342	8.35052	0.862013	5.57174	2.94576	0.337592	2.81681	0.956226	1875.07	45.8302	1911.74	25.3646	1952.52	15.3978	1952.52	15.3978	96.0334		1952.52	7.69889
82	58.9713	14307.8	0.858776	8.3133	0.930439	5.88287	2.45711	0.354854	2.27413	0.925531	1957.74	38.3969	1958.71	21.3274	1960.5	16.6047	1960.5	16.6047	99.8591		1960.5	8.30236
109	99.4428	432073	0.712394	8.30451	0.932646	5.87895	2.09285	0.354243	1.87355	0.895215	1954.83	31.5931	1958.13	18.1632	1962.39	16.6404	1962.39	16.6404	99.6147		1962.39	8.32022
4	76.2755	29483.1	1.13829	8.28934	1.08799	5.73698	2.63207	0.345057	2.39668	0.910568	1910.95	39.6354	1936.96	22.7624	1965.65	19.4052	1965.65	19.4052	97.2175		1965.65	9.70261
12	134.808	32983.2	1.83569	8.28526	1.10287	5.72622	2.67653	0.34424	2.43875	0.911161	1907.04	40.2602	1935.33	23.1406	1966.52	19.6686	1966.52	19.6686	96.9751		1966.52	9.83428
42	202.913	65249.6	0.905547	8.20438	0.819153	5.65915	3.03862	0.336888	2.92613	0.962978	1871.68	47.5346	1925.16	26.2262	1984	14.5803	1984	14.5803	94.3386		1984	7.29015
43	80.2967	846816	1.8998	8.17045	1.09456	6.06557	2.83986	0.359588	2.62045	0.922739	1980.22	44.6786	1985.31	24.7593	1991.37	19.4638	1991.37	19.4638	99.4399		1991.37	9.7319
4	82.8138	34574.1	2.14973	8.05719	0.96243	6.02434	2.61051	0.352193	2.42662	0.929558	1945.06	40.7444	1979.37	22.7369	2016.16	17.0649	2016.16	17.0649	96.4737		2016.16	8.53244
8	787.119	70137.6	2.11964	7.98139	0.80247	6.40483	1.67149	0.370915	1.46626	0.877218	2033.7	25.5739	2032.93	14.6811	2032.9	14.2007	2032.9	14.2007	100.039		2032.9	7.10035
97	200.364	52207.2	2.77464	7.96713	0.727934	6.39703	2.3914	0.369801	2.27792	0.952545	2028.47	39.6435	2031.86	21.0022	2036.07	12.8768	2036.07	12.8768	99.6265		2036.07	6.4384
44	550.381	437131	12.6655	7.94974	0.785127	6.77164	2.02434	0.390602	1.86588	0.921725	2125.62	33.7861	2082.02	17.9118	2039.93	13.8826	2039.93	13.8826	104.201		2039.93	6.94129
50	106.719	111503	1.73942	7.91359	0.921205	6.72067	2.80227	0.385899	2.64653	0.944422	2103.78	47.5056	2075.34	24.7733	2047.99	16.2742	2047.99	16.2742	102.724		2047.99	8.13709
72	179.395	33285.9	2.96917	7.90071	0.864248	6.6349	2.49239	0.380355	2.33776	0.937956	2077.94	41.5261	2064	21.9961	2050.86	15.2628	2050.86	15.2628	101.32		2050.86	7.63139
49	111.075	124076	2.6965	7.849	0.73993	6.76448	2.21964	0.385245	2.09268	0.942801	2100.74	37.5177	2081.09	19.6376	2062.45	13.0495	2062.45	13.0495	101.856		2062.45	6.52477
29	108.264	149809	3.32226	7.83459	0.94557	6.68957	3.07117	0.380279	2.92198	0.951423	2077.59	51.8968	2071.24	27.1352	2065.7	16.6709	2065.7	16.6709	100.576		2065.7	8.33546
101	96.9793	115360	1.73393	7.82935	0.96532	6.73579	2.26005	0.382651	2.04352	0.904193	2088.65	36.4579	2077.33	19.9843	2066.87	17.0169	2066.87	17.0169	101.054		2066.87	8.50845
49	113.961	99915.9	1.4042	7.8131	0.746049	6.81606	2.15416	0.386407	2.02084	0.938113	2106.14	36.3086	2087.81	19.0767	2070.54	13.1454	2070.54	13.1454	101.72		2070.54	6.57272
105	21.2311	25380.4	1.41988	7.74546	1.28211	6.55529	3.03138	0.368406	2.7469	0.906155	2021.89	47.6738	2053.36	26.7123	2085.84	22.5539	2085.84	22.5539	96.9342		2085.84	11.2769
38	354.744	69908.1	2.03876	7.63655	0.816428	6.75613	1.76112	0.374355	1.56044	0.886052	2049.86	27.4001	2080	15.5778	2110.72	14.3207	2110.72	14.3207	97.1166		2110.72	7.16033
92	437.145	111391	6.40402	7.63578	0.813405	6.88513	2.32082	0.381464	2.17361	0.93657	2083.12	38.6918	2096.74	20.5795	2110.9	14.2673	2110.9	14.2673	98.6841		2110.9	7.13367
40	57.3045	13101.5	2.32461	7.63172	1.18638	6.67617	3.08755	0.36969	2.85052	0.923231	2027.94	49.5982	2069.47	27.2729	2111.82	20.8086	2111.82	20.8086	96.0279		2111.82	10.4043
91	9.14613	3558.21	0.574573	7.0654	1.18681	8.09118	2.18884	0.414798	1.83916	0.840243	2236.82	34.7603	2241.26	19.7829	2246.06	20.5112	2246.06	20.5112	99.5887		2246.06	10.2556
52	506.57	15612.7	1.56478	7.00913	1.01997	6.86359	3.55324	0.349063	3.4037	0.957915	1930.12	56.7743	2093.97	31.501	2259.87	17.6011	2259.87	17.6011	85.4087		2259.87	8.80053
60	53.2052	45256.7	1.78696	6.87635	0.840294	8.80751	2.8332	0.439439	2.70572	0.955005	2348.13	53.2496	2318.27	25.8402	2292.81	14.4489	2292.81	14.4489	102.413		2292.81	7.22446
79	341.214	26776	1.89222	6.81777	1.11777	8.198	2.56514	0.405544	2.30879	0.900066	2194.52	42.9441	2253.12	23.2183	2307.51	19.1914	2307.51	19.1914	95.1033		2307.51	9.59569
2	107.898	59582.9	2.09655	6.81283	1.26533	8.4508	2.45161	0.417747	2.09985	0.856516	2250.24	39.8865	2280.65	22.2629	2308.75	21.7226	2308.75	21.7226	97.4659		2308.75	10.8613
24	161.639	51588.6	0.990595	6.49606	0.864006	9.56302	2.32131	0.450747	2.15452	0.92815	2398.57	43.1536	2393.62	21.3419	2390.14	14.7062	2390.14	14.7062	100.353		2390.14	7.35311
58	28.1781	108338	0.365202	6.3464	1.19445	10.0073	3.25478	0.460822	3.02768	0.930228	2443.18	61.5712	2435.46	30.0548	2429.73	20.2496	2429.73	20.2496	100.554		2429.73	10.1248
17	210.396	40075.7	2.00961	6.32499	0.879073	9.72327	2.42754	0.446231	2.26278	0.93213	2378.48	45.0081	2408.91	22.3538	2435.46	14.8934	2435.46	14.8934	97.6603		2435.46	7.44672
66	164.844	562106	1.59729	6.25033	0.798064	10.1605	2.54765	0.460792	2.41943	0.949669	2443.05	49.1989	2449.49	23.5548	2455.56	13.4929	2455.56	13.4929	99.4908		2455.56	6.74646
1	213.025	150259	2.7013	6.16226	0.899107	10.311	2.99026	0.461031	2.85189	0.953726	2444.11	58.0141	2463.1	27.6852	2479.52	15.1653	2479.52	15.1653	98.5718		2479.52	7.58264
33	308.115	129670	2.74764	6.10152	1.02022	11.0087	2.34228	0.487372	2.10842	0.900156	2559.29	44.5372	2523.86	21.806	2496.22	17.1796	2496.22	17.1796	102.527		2496.22	8.58982
16	227.791	417010	1.96544	5.96797	1.01708	11.0421	3.32445	0.478154	3.16504	0.952051	2519.22	66.0026	2526.69	30.9623	2533.42	17.0666	2533.42	17.0666	99.4396		2533.42	8.5333
73	575.346	147917	2.38337	5.95485	0.907718	11.375	2.54875	0.491486	2.38164	0.934432	2577.1	50.5935	2554.38	23.7927	2537.11	15.2258	2537.11	15.2258	101.576		2537.11	7.61291
32	11.8061	26574	1.42553	5.94459	0.929019	11.1797	2.48102	0.482213	2.30052	0.927247	2536.9	48.248	2538.22	23.1275	2540	15.5757	2540	15.5757	99.8778		2540	7.78786
7	39.2244	73303	1.89499	5.92854	1.00859	11.2024	2.50717	0.481887	2.29535	0.915515	2535.48	48.1177	2540.11	23.3752	2544.53	16.9027	2544.53	16.9027	99.6442		2544.53	8.45135
34	350.558	300354	3.68036	5.86489	0.869325	11.5674	2.12094	0.492247	1.93459	0.91214	2580.39	41.1392	2570.04	19.8245	2562.6	14.5426	2562.6	14.5426	100.694		2562.6	7.2713
10	176.369	401124	1.69589	5.77764	0.847275	11.6102	2.5335	0.486718	2.38763	0.942421	2556.46	50.3898	2573.49	23.6891	2587.65	14.1389	2587.65	14.1389	98.7947		2587.65	7.06943
33	140.636	88585.6	1.94397	5.70774	1.09431	11.2283	2.69065	0.465015	2.45806	0.913558	2461.66	50.2973	2542.27	25.0913	2607.94	18.2269	2607.94	18.2269	94.391		2607.94	9.11343
41	158.031	117690	2.07844	5.69959	0.818667	12.0274	2.17921	0.497395	2.01959	0.926753	2602.59	43.2467	2606.54	20.4316	2610.32	13.6317	2610.32	13.6317	99.7039		2610.32	6.81586
32	162.596	57322.3	2.46123	5.69706	0.839034	11.6617	2.66537	0.482058	2.52986	0.949161	2536.22	53.0468	2577.63	24.9313	2611.06	13.973	2611.06	13.973	97.1339		2611.06	6.98652
6	301.508	136842	1.79938	5.67796	0.792521	11.6885	2.79716	0.481549	2.68254	0.959022	2534.01	56.2081	2579.78	26.1693	2616.65	13.1912	2616.65	13.1912	96.8416		2616.65	6.59561
15	36.2383	29978	0.748224	5.64828	1.1706	12.1849	2.75569	0.499372	2.4947	0.90529	2611.1	53.5625	2618.74	25.8642	2625.37	19.465	2625.37	19.465	99.4563		2625.37	9.73251
9	69.8295	32325.8	1.22337	5.61143	1.02144	12.3721	2.63587	0.503738	2.42991	0.921863	2629.84	52.4749	2633.06	24.7676	2636.25	16.9666	2636.25	16.9666	99.7569		2636.25	8.48328
18	107.445	58486.9	2.10644	5.57722	0.912114	12.5027	2.46969	0.505951	2.29509	0.929301	2639.32	49.7077	2642.93	23.2237	2646.4	15.1356	2646.4	15.1356	99.7325		2646.4	7.56779
21	122.015	57441.8	1.63007	5.50666	0.867273	12.6343	2.38077	0.50481	2.21718	0.931288	2634.43	47.9484	2652.78	22.4045	2667.51	14.3656	2667.51	14.3656	98.7601		2667.51	7.1828
25	101.127	91475.3	2.60901	5.45508	0.837398	13.2422	2.94186	0.524142	2.82016	0.958632	2716.72	62.5215	2697.07	27.7807	2683.08	13.8471	2683.08	13.8471	101.254		2683.08	6.92354
20	39.7964	31236	1.84541	5.43944	1.13493	12.8779	2.89193	0.508263	2.65992	0.919774	2649.21	57.7843	2670.76	27.2548	2687.83	18.7602	2687.83	18.7602	98.5632		2687.83	9.38011
27	222.287	58694.5	1.50697	5.43097	0.906646	12.794	2.53302	0.504165	2.3652	0.933748	2631.67	51.106	2664.6	23.8597	2690.4	14.9823	2690.4	14.9823	97.8169		2690.4	7.49113
1	146.695	80768.4	2.95753	5.39437	1.0402	12.0971	2.96156	0.47349	2.77288	0.936288	2498.85	57.4412	2611.97	27.7821	2701.57	17.1719	2701.57	17.1719	92.496		2701.57	8.58594
15	175.826	106822	1.99675	5.37289	0.960511	13.2554	3.41357	0.51676	3.27565	0.959596	2685.43	71.9459	2698.01	32.2403	2708.16	15.8496	2708.16	15.8496	99.1606		2708.16	7.92481
7	72.8925	37978.1	0.942329	5.31712	1.17615	13.4217	3.25169	0.517811	3.03153	0.932292	2689.89	66.6728	2709.79	30.7371	2725.36	19.3736	2725.36	19.3736	98.6984		2725.36	9.68682
100	53.9903	27122.3	1.56527	5.26033	0.667493	13.9261	2.39641	0.531534	2.30157	0.960425	2747.91	51.494	2744.69	22.7063	2743.03	10.9754	2743.03	10.9754	100.178		2743.03	5.48771
93	96.7915	55246.5	2.27855	5.19385	0.937964	14.0886	2.49415	0.53094	2.31106	0.926593	2745.41	51.6685	2755.69	23.651	2763.93	15.3977	2763.93	15.3977	99.3299		2763.93	7.69887
22	168.064	129691	1.77883	4.93664	0.952227	15.0063	2.76552	0.537519	2.59641	0.938852	2773.05	58.5163	2815.64	26.3322	2846.98	15.5116	2846.98	15.5116	97.4035		2846.98	7.75579
77	77.3434	396706	2.02708	4.72531	0.841939	16.5515	2.45869	0.567487	2.31005	0.939542	2897.5	53.914	2909.22	23.547	2918.03	13.632	2918.03	13.632	99.2963		2918.03	6.81602
9	43.6608	27484.9	1.62517	3.97514	0.954453	21.8319	2.92962	0.629699	2.76978	0.945441	3148.4	68.9932	3176.28	28.4515	3194.62	15.1011	3194.62	15.1011	98.5531		3194.62	7.55056
103	282.176	27624.2	4.30794	3.95807	0.793108	17.6603	3.21797	0.507187	3.11871	0.969152	2644.61	67.6565	2971.41	30.9333	3201.43	12.5413	3201.43	12.5413	82.6072		3201.43	6.27064
																					1693.52	13.677
Waterloo quartzite, Mud Lake locality, Sample 05ES15 (43.27458º N, 88.8310º W)																					1714.91	9.95794
3	590.358	9649.43	3.39288	9.63189	1.48356	4.15906	4.35098	0.290667	4.09024	0.940074	1644.86	59.3828	1666	35.6303	1693.52	27.354	1693.52	27.354	97.1266		1716.59	8.24333
38	156.215	88500.3	1.60303	9.52061	1.08312	4.51051	2.98497	0.311586	2.78152	0.931844	1748.51	42.5979	1732.91	24.8136	1714.91	19.9159	1714.91	19.9159	101.959		1720.05	8.61755
9	1645.74	15214.8	6.30703	9.51194	0.896839	4.39379	2.10248	0.303247	1.90161	0.904458	1707.39	28.5241	1711.17	17.392	1716.59	16.4867	1716.59	16.4867	99.4639		1721.67	9.22974
26	771.539	25543.5	1.02231	9.49403	0.937954	4.49794	2.58638	0.309851	2.41031	0.931925	1739.97	36.7558	1730.59	21.4882	1720.05	17.2351	1720.05	17.2351	101.158		1723.91	8.65584
48	401.323	45227.4	8.74223	9.48571	1.00469	4.46677	2.40138	0.307433	2.1811	0.908272	1728.06	33.062	1724.82	19.9255	1721.67	18.4595	1721.67	18.4595	100.372		1732.13	8.1461
4	233.523	110663	3.30948	9.47411	0.942485	4.5215	2.88939	0.31082	2.73135	0.945305	1744.74	41.7511	1734.93	24.0294	1723.91	17.3117	1723.91	17.3117	101.208		1736.31	8.2201
27	622.043	96121.4	2.63229	9.43178	0.887996	4.66914	2.48204	0.319535	2.31776	0.93381	1787.46	36.1816	1761.73	20.7596	1732.13	16.2922	1732.13	16.2922	103.194		1740.18	8.73335
13	744.237	8975.49	6.81579	9.41035	0.896529	4.68643	2.70198	0.31999	2.54891	0.943348	1789.68	39.833	1764.82	22.6145	1736.31	16.4402	1736.31	16.4402	103.074		1740.94	8.64358
88	148.528	39910.9	1.53791	9.39052	0.952958	4.73511	3.00904	0.322632	2.85416	0.948526	1802.57	44.8819	1773.48	25.2311	1740.18	17.4667	1740.18	17.4667	103.586		1741	11.0111
45	253.218	401148	3.52369	9.38657	0.943255	4.68267	2.88574	0.318925	2.72722	0.94507	1784.48	42.5122	1764.15	24.1496	1740.94	17.2872	1740.94	17.2872	102.5		1745.64	7.29692
69	608.869	34862.8	2.32485	9.38629	1.20158	4.71404	2.66149	0.321052	2.37481	0.892287	1794.86	37.2055	1769.74	22.2984	1741	22.0221	1741	22.0221	103.094		1749.37	9.05508
42	159.173	47096.2	3.30198	9.36251	0.796784	4.60902	2.72058	0.313104	2.60129	0.956151	1755.96	39.9854	1750.9	22.7031	1745.64	14.5938	1745.64	14.5938	100.591		1751.73	7.91938
6	88.4425	32350.4	1.3146	9.34347	0.989194	4.63999	2.68661	0.314567	2.49787	0.929749	1763.14	38.5321	1756.49	22.4462	1749.37	18.1102	1749.37	18.1102	100.787		1753.09	8.33913
23	279.137	251123	2.36381	9.33144	0.865398	4.55937	2.53754	0.308703	2.38541	0.940049	1734.32	36.2732	1741.87	21.1341	1751.73	15.8388	1751.73	15.8388	99.0062		1758.68	6.965
59	313.75	804977	3.87286	9.32454	0.911414	4.57796	2.9984	0.309733	2.85652	0.952683	1739.39	43.5479	1745.26	24.9921	1753.09	16.6783	1753.09	16.6783	99.2189		1761.11	8.76823
17	270.801	21643	2.41535	9.29608	0.761683	4.54148	3.12014	0.306326	3.02574	0.969745	1722.6	45.7393	1738.6	25.9699	1758.68	13.93	1758.68	13.93	97.9488		1762.41	9.05338
94	380.988	136493	3.63564	9.28371	0.959165	4.72802	2.61889	0.318485	2.43692	0.930517	1782.33	37.9471	1772.22	21.9528	1761.11	17.5365	1761.11	17.5365	101.205		1763.08	10.4335
39	264.41	60037.6	1.51343	9.27713	0.990614	4.63941	2.85666	0.312294	2.6794	0.937949	1751.99	41.105	1756.39	23.867	1762.41	18.1068	1762.41	18.1068	99.4087		1764.43	8.6901
18	248.134	31457	2.19223	9.27372	1.14169	4.72195	2.81982	0.317733	2.57836	0.914369	1778.65	40.0776	1771.14	23.6324	1763.08	20.867	1763.08	20.867	100.883		1766.25	7.7212
19	116.036	122348	2.88578	9.2669	0.951109	4.68421	3.13702	0.314962	2.98936	0.95293	1765.08	46.1582	1764.42	26.2549	1764.43	17.3802	1764.43	17.3802	100.037		1766.36	7.81439
68	317.83	109623	1.72506	9.25764	0.845273	4.71689	2.95909	0.316843	2.8358	0.958333	1774.29	43.9855	1770.24	24.7954	1766.25	15.4424	1766.25	15.4424	100.455		1767.91	8.27467
54	147.828	73668.5	1.90549	9.25708	0.855485	4.72268	2.50869	0.317212	2.35832	0.94006	1776.1	36.6116	1771.27	21.0246	1766.36	15.6288	1766.36	15.6288	100.551		1767.94	10.2402
45	259.064	45785.2	3.14029	9.24923	0.90604	4.8225	2.64999	0.323643	2.49029	0.939735	1807.5	39.2527	1788.83	22.2899	1767.91	16.5493	1767.91	16.5493	102.239		1768.04	9.16029
37	112.768	37689.9	3.32808	9.24907	1.12122	4.80645	2.98455	0.32256	2.76593	0.926751	1802.22	43.4872	1786.03	25.0906	1767.94	20.4804	1767.94	20.4804	101.939		1768.46	8.87835
4	226.508	1.16275e+06	2.34278	9.24858	1.00301	4.81637	2.69659	0.323209	2.50311	0.92825	1805.38	39.4147	1787.76	22.6769	1768.04	18.3206	1768.04	18.3206	102.112		1769.15	8.59287
46	295.909	137127	2.30573	9.24646	0.972195	4.83776	2.98892	0.324569	2.82639	0.945622	1812.01	44.6468	1791.49	25.1554	1768.46	17.7567	1768.46	17.7567	102.462		1769.25	9.14356
49	287.182	143058	0.86288	9.24298	0.94102	4.80214	2.84918	0.322058	2.6893	0.943884	1799.77	42.2325	1785.27	23.9484	1769.15	17.1857	1769.15	17.1857	101.731		1769.3	10.234
80	386.928	35288.4	2.71872	9.24246	1.00133	4.66757	2.1682	0.313016	1.92313	0.886971	1755.53	29.5547	1761.45	18.133	1769.25	18.2871	1769.25	18.2871	99.2246		1773.09	9.84268
42	242.84	96198.8	1.94024	9.2422	1.12074	4.6201	2.66279	0.309823	2.41545	0.907112	1739.84	36.8317	1752.91	22.2302	1769.3	20.4681	1769.3	20.4681	98.3348		1774.38	9.28399
30	105.363	842509	2.06008	9.22306	1.07839	4.54909	3.27903	0.30443	3.09662	0.944373	1713.24	46.5887	1740	27.3012	1773.09	19.6854	1773.09	19.6854	96.6246		1774.54	8.31108
15	187.443	72684.6	1.97318	9.21654	1.01735	4.66251	3.3155	0.3118	3.15556	0.951759	1749.56	48.3516	1760.54	27.7267	1774.38	18.568	1774.38	18.568	98.6011		1776.39	9.36162
15	268.962	41500.2	2.00027	9.2157	0.910773	4.73231	2.96695	0.316438	2.8237	0.951718	1772.31	43.7554	1772.98	24.8754	1774.54	16.6222	1774.54	16.6222	99.8742		1778.19	8.64825
47	143.954	36613.8	2.15207	9.20639	1.02611	4.74768	3.17265	0.317146	3.00213	0.946254	1775.77	46.5993	1775.7	26.6158	1776.39	18.7232	1776.39	18.7232	99.9654		1778.61	10.2195
47	402.334	70576	2.70778	9.19733	0.948142	4.77025	2.44295	0.31834	2.25145	0.921612	1781.62	35.0469	1779.68	20.5093	1778.19	17.2965	1778.19	17.2965	100.193		1778.74	8.91343
49	590.929	21240.8	1.53492	9.1952	1.12043	4.68135	2.50437	0.312334	2.23976	0.894339	1752.18	34.3636	1763.91	20.9561	1778.61	20.4389	1778.61	20.4389	98.5144		1778.87	10.5027
63	433.689	345362	3.46568	9.19453	0.977278	4.75166	2.54055	0.317002	2.34507	0.923054	1775.07	36.3876	1776.4	21.3144	1778.74	17.8269	1778.74	17.8269	99.7937		1783.78	9.45288
87	541.864	1.23388e+06	1.56896	9.19388	1.15152	5.00115	2.73894	0.333624	2.48512	0.907327	1855.92	40.0769	1819.52	23.1805	1778.87	21.0054	1778.87	21.0054	104.332		1784.41	7.51777
17	510.492	12180	3.19362	9.16912	1.03706	4.04819	2.96812	0.269325	2.78105	0.936974	1537.37	38.0396	1643.94	24.1723	1783.78	18.9058	1783.78	18.9058	86.1862		1785.29	11.7578
32	207.407	216828	1.06867	9.16595	0.824855	4.72904	2.66121	0.314513	2.53015	0.950751	1762.88	39.0251	1772.4	22.3085	1784.41	15.0355	1784.41	15.0355	98.7931		1785.79	9.71418
92	542.648	14897	4.39605	9.16154	1.29013	4.34838	4.09656	0.289057	3.88811	0.949115	1636.82	56.2055	1702.59	33.831	1785.29	23.5156	1785.29	23.5156	91.6834		1785.83	8.57269
7	381.57	26084.9	5.23819	9.15904	1.06599	4.4783	2.47202	0.297613	2.23037	0.902246	1679.46	32.9765	1726.96	20.5214	1785.79	19.4284	1785.79	19.4284	94.0459		1786.45	7.96963
55	433.063	47229.1	1.50999	9.15881	0.940748	4.76686	2.54737	0.316781	2.3673	0.92931	1773.99	36.7131	1779.08	21.3835	1785.83	17.1454	1785.83	17.1454	99.3367		1791.29	8.21958
105	298.422	374143	1.93683	9.15569	0.874646	4.82066	2.54531	0.320247	2.39031	0.939105	1790.94	37.3772	1788.51	21.4076	1786.45	15.9393	1786.45	15.9393	100.251		1792.41	8.69304
8	334.553	13165.3	1.75185	9.13141	0.90261	4.27161	2.07021	0.28302	1.86308	0.899947	1606.55	26.4933	1687.91	17.0346	1791.29	16.4392	1791.29	16.4392	89.6868		1795.25	8.80158
29	303.364	144013	3.18405	9.1258	0.954726	4.78423	2.7157	0.316789	2.54234	0.936166	1774.03	39.4287	1782.13	22.8113	1792.41	17.3861	1792.41	17.3861	98.9743		1805.77	8.19153
3	1161.18	17788.2	3.0002	9.11159	0.966982	5.04604	2.74219	0.333605	2.56603	0.935762	1855.83	41.3801	1827.08	23.2425	1795.25	17.6032	1795.25	17.6032	103.374		1806.42	7.16108
77	374.775	341822	2.95457	9.05906	0.901135	5.09834	2.55837	0.335119	2.39441	0.935913	1863.15	38.7437	1835.83	21.7208	1805.77	16.3831	1805.77	16.3831	103.177		1808.92	8.38325
74	113.487	117564	6.19666	9.05581	0.787858	5.00067	2.83631	0.328581	2.72469	0.960646	1831.5	43.4407	1819.44	24.0045	1806.42	14.3222	1806.42	14.3222	101.388		1809.35	11.0098
2	165.474	96289.6	3.53	9.04337	0.922579	5.16643	2.53591	0.339007	2.36214	0.931475	1881.89	38.5527	1847.1	21.5768	1808.92	16.7665	1808.92	16.7665	104.034		1811.91	8.03489
108	137.835	8437.89	1.85441	9.04122	1.21164	4.87243	2.95426	0.319639	2.69436	0.912025	1787.97	42.0712	1797.5	24.8939	1809.35	22.0196	1809.35	22.0196	98.8181		1814.23	9.04994
6	251.696	19161.6	3.14283	9.02853	0.88457	4.76488	2.80928	0.312145	2.66639	0.949134	1751.25	40.8904	1778.73	23.5812	1811.91	16.0698	1811.91	16.0698	96.6526		1814.9	9.08352
25	340.608	35027.9	9.64549	9.01698	0.996583	4.75846	2.23497	0.311326	2.00047	0.89508	1747.23	30.6168	1777.6	18.7547	1814.23	18.0999	1814.23	18.0999	96.3068		1814.91	7.82785
106	679.231	11299.3	2.42961	9.01364	1.00036	4.74158	2.50552	0.310107	2.29715	0.916836	1741.23	35.0523	1774.62	21.0127	1814.9	18.167	1814.9	18.167	95.9407		1816.09	7.24324
98	200.574	634513	1.90087	9.01363	0.862097	5.08399	2.78434	0.3325	2.64751	0.950859	1850.49	42.588	1833.44	23.6291	1814.91	15.6557	1814.91	15.6557	101.961		1817.13	8.00285
22	344.318	107507	2.72475	9.00777	0.797837	4.74765	2.29799	0.310301	2.15504	0.937795	1742.19	32.8995	1775.69	19.276	1816.09	14.4865	1816.09	14.4865	95.9309		1817.2	10.5738
67	144.089	872015	1.88412	9.0026	0.881606	5.04613	2.90709	0.32962	2.77019	0.952908	1836.54	44.2711	1827.1	24.6408	1817.13	16.0057	1817.13	16.0057	101.068		1818.32	8.17268
104	486.336	10274.6	3.20567	9.00223	1.16479	4.50275	2.34161	0.294114	2.03135	0.867503	1662.06	29.7611	1731.48	19.4579	1817.2	21.1477	1817.2	21.1477	91.4623		1819.4	9.9772
64	261.577	25311.5	1.82243	8.99667	0.900443	4.97189	2.73402	0.324557	2.58149	0.944209	1811.95	40.777	1814.55	23.1162	1818.32	16.3454	1818.32	16.3454	99.6494		1819.7	7.54229
102	209.144	205632	3.22521	8.99134	1.09937	5.12767	3.40876	0.334528	3.22661	0.946565	1860.29	52.141	1840.7	28.9714	1819.4	19.9544	1819.4	19.9544	102.248		1820.94	11.1006
20	85.3145	50919.7	2.11224	8.98986	0.831139	5.14175	2.72832	0.335391	2.59864	0.952469	1864.46	42.0739	1843.03	23.1963	1819.7	15.0846	1819.7	15.0846	102.46		1823.01	8.76181
11	99.4248	36552.3	1.73042	8.98371	1.22336	4.99624	2.91772	0.325677	2.64886	0.907853	1817.39	41.95	1818.69	24.6901	1820.94	22.2012	1820.94	22.2012	99.8053		1823.54	10.1574
14	207.85	9382.44	2.48899	8.97346	0.965895	4.95585	3.30788	0.322676	3.16371	0.956419	1802.78	49.755	1811.82	27.9552	1823.01	17.5236	1823.01	17.5236	98.8904		1826.85	9.19239
33	129.586	45155.3	3.01286	8.97084	1.11979	5.08426	3.03388	0.33094	2.81966	0.929391	1842.94	45.1973	1833.48	25.7479	1823.54	20.3148	1823.54	20.3148	101.064		1829.13	9.39173
62	103.343	32284.9	2.19007	8.9545	1.01383	5.1268	2.7744	0.3331	2.58253	0.930842	1853.39	41.5988	1840.56	23.577	1826.85	18.3848	1826.85	18.3848	101.453		1829.39	8.95869
16	327.084	181468	3.86458	8.94322	1.0361	5.05012	3.13701	0.327705	2.96097	0.943882	1827.25	47.1131	1827.77	26.594	1829.13	18.7835	1829.13	18.7835	99.897		1830.22	10.819
83	97.5619	26222.1	1.77001	8.94197	0.988363	5.17679	3.1489	0.335878	2.98977	0.949464	1866.81	48.4594	1848.81	26.8032	1829.39	17.9174	1829.39	17.9174	102.046		1831.02	7.99987
33	162.511	49730.4	3.01654	8.93788	1.19369	5.15305	3.10442	0.334185	2.86575	0.92312	1858.63	46.2738	1844.9	26.4048	1830.22	21.638	1830.22	21.638	101.553		1832.78	8.45192
89	567.158	31319.1	3.87383	8.93389	0.882773	4.8889	2.62187	0.316913	2.46879	0.941614	1774.63	38.2993	1800.34	22.1048	1831.02	15.9997	1831.02	15.9997	96.9203		1834.51	8.33292
86	110.457	40222.6	2.05221	8.92523	0.932847	5.16328	2.71763	0.334374	2.55251	0.939242	1859.55	41.2332	1846.58	23.1212	1832.78	16.9038	1832.78	16.9038	101.46		1834.55	8.82148
13	75.9094	16183.1	2.81405	8.91672	0.919805	5.18256	2.48889	0.335303	2.31269	0.929205	1864.03	37.4368	1849.76	21.1873	1834.51	16.6658	1834.51	16.6658	101.609		1835.14	8.3678
58	287.98	61438.3	2.69859	8.91654	0.973839	5.07246	3.19978	0.328173	3.04799	0.952562	1829.52	48.5499	1831.51	27.1461	1834.55	17.643	1834.55	17.643	99.7261		1835.57	8.39667
95	655.237	22358.4	1.93145	8.91364	0.923727	5.31728	2.4676	0.3439	2.28818	0.92729	1905.4	37.7466	1871.64	21.0924	1835.14	16.7356	1835.14	16.7356	103.829		1838.54	8.44619
97	297.565	61262.7	1.06878	8.91151	0.926962	5.09417	3.12488	0.329392	2.98423	0.95499	1835.43	47.6671	1835.14	26.529	1835.57	16.7933	1835.57	16.7933	99.9925		1840.41	10.2378
91	103.899	46293.3	1.41981	8.89689	0.932871	5.07164	2.62268	0.327397	2.45117	0.934603	1825.75	38.9736	1831.37	22.2478	1838.54	16.8924	1838.54	16.8924	99.3042		1840.72	8.52177
76	119.14	19391.4	4.17048	8.88774	1.13098	4.10174	2.94165	0.264513	2.71555	0.923137	1512.89	36.6188	1654.65	24.0188	1840.41	20.4757	1840.41	20.4757	82.2041		1840.82	7.98161
35	449.799	63926.9	7.30229	8.88622	0.941466	5.0649	2.35723	0.32657	2.16106	0.916779	1821.73	34.2953	1830.25	19.991	1840.72	17.0435	1840.72	17.0435	98.9687		1841.05	8.41177
34	265.858	60138.6	3.17549	8.88573	0.881811	4.91788	2.84477	0.317073	2.70465	0.950744	1775.42	41.9744	1805.33	24.0088	1840.82	15.9632	1840.82	15.9632	96.4472		1841.21	8.97818
44	115.338	160441	4.28052	8.8846	0.929352	5.21205	3.18525	0.335996	3.04666	0.956489	1867.38	49.3946	1854.59	27.1426	1841.05	16.8235	1841.05	16.8235	101.43		1842.14	9.676
90	138.826	359506	2.02738	8.88379	0.99194	5.01858	2.71265	0.323495	2.52478	0.930744	1806.77	39.7825	1822.46	22.9712	1841.21	17.9564	1841.21	17.9564	98.1296		1842.58	8.47016
21	149.114	31947.7	0.844218	8.87923	1.06915	5.14105	3.04458	0.331219	2.85069	0.936314	1844.29	45.7236	1842.92	25.8858	1842.14	19.352	1842.14	19.352	100.116		1843.89	9.37117
48	509.294	384326	1.9387	8.87708	0.935977	5.21126	2.28735	0.335661	2.08709	0.912446	1865.76	33.8117	1854.46	19.4885	1842.58	16.9403	1842.58	16.9403	101.258		1844.07	9.16011
8	319.241	185582	1.76946	8.87064	1.03569	5.01628	3.03478	0.322867	2.85258	0.939964	1803.72	44.8819	1822.07	25.6982	1843.89	18.7423	1843.89	18.7423	97.8211		1845.21	8.25339
25	235.355	99934.2	1.68272	8.86978	1.01239	5.24192	2.84411	0.337358	2.65782	0.934501	1873.95	43.2209	1859.46	24.2566	1844.07	18.3202	1844.07	18.3202	101.62		1847.43	8.29664
50	599.544	9429.79	5.34348	8.86417	0.912318	4.95719	2.14888	0.318832	1.9456	0.905402	1784.02	30.3213	1812.05	18.1586	1845.21	16.5068	1845.21	16.5068	96.6837		1847.66	9.96629
22	236.886	65842.6	1.68497	8.85332	0.917344	5.1172	3.06734	0.32872	2.92695	0.954232	1832.17	46.6804	1838.96	26.0596	1847.43	16.5933	1847.43	16.5933	99.1742		1852.44	6.98736
19	299.916	256039	2.18181	8.85218	1.10195	5.12148	3.1613	0.328953	2.96302	0.937281	1833.3	47.2808	1839.68	26.8619	1847.66	19.9326	1847.66	19.9326	99.2228		1852.77	9.10431
100	311.825	15757.5	1.50747	8.82883	0.77307	4.77418	3.21372	0.305837	3.11935	0.970636	1720.19	47.0968	1780.37	26.9866	1852.44	13.9747	1852.44	13.9747	92.8606		1853.23	7.91715
70	92.574	791057	2.37631	8.82723	1.00728	5.28379	3.29449	0.338422	3.13673	0.952113	1879.07	51.1292	1866.25	28.1354	1852.77	18.2086	1852.77	18.2086	101.42		1853.5	8.66159
29	212.136	2.09564e+06	2.71108	8.82495	0.876006	5.23041	3.0525	0.334916	2.9241	0.957937	1862.16	47.2934	1857.58	26.0256	1853.23	15.8343	1853.23	15.8343	100.482		1858.06	10.1206
103	357.457	338059	3.53323	8.82363	0.958394	5.13227	2.16609	0.328583	1.94253	0.896791	1831.51	30.9703	1841.46	18.4095	1853.5	17.3232	1853.5	17.3232	98.8133		1858.39	9.74616
12	203.153	76856.6	4.08071	8.80142	1.12043	5.13453	3.79605	0.3279	3.62693	0.955449	1828.19	57.7358	1841.84	32.2721	1858.06	20.2413	1858.06	20.2413	98.3928		1862.33	8.61966
43	54.8114	58144.9	2.87038	8.7998	1.07902	5.21927	3.11289	0.33325	2.9199	0.938002	1854.12	47.0492	1855.77	26.5315	1858.39	19.4923	1858.39	19.4923	99.7701		1862.33	8.32629
28	327.052	22424.4	3.35881	8.78064	0.954772	5.0487	2.63043	0.321657	2.45104	0.9318	1797.82	38.4546	1827.53	22.2969	1862.33	17.2393	1862.33	17.2393	96.5361		1862.41	9.79391
44	103.645	72932.9	1.82417	8.78061	0.922282	5.27845	2.64067	0.336293	2.47437	0.937026	1868.81	40.1426	1865.38	22.546	1862.33	16.6526	1862.33	16.6526	100.348		1867.25	10.0823
5	229.098	62189.7	0.770369	8.78021	1.08483	5.33369	3.2116	0.339797	3.02283	0.941223	1885.69	49.4222	1874.28	27.4681	1862.41	19.5878	1862.41	19.5878	101.25		1873.78	8.26755
57	58.9726	15534.9	4.49265	8.75673	1.11741	5.48052	3.04676	0.348218	2.83446	0.930318	1926.09	47.1941	1897.55	26.1684	1867.25	20.1645	1867.25	20.1645	103.151		1877.29	9.32091
110	144.568	110182	0.667387	8.72507	0.916935	5.29863	2.84106	0.335444	2.68903	0.946486	1864.71	43.5426	1868.64	24.2723	1873.78	16.5351	1873.78	16.5351	99.5161		1879.15	11.392
31	271.184	489582	2.59149	8.7081	1.0343	5.41316	2.23688	0.342028	1.9834	0.88668	1896.42	32.586	1886.94	19.1736	1877.29	18.6418	1877.29	18.6418	101.019		1887.59	9.34729
82	83.4845	32810.5	3.19842	8.69912	1.26435	5.35316	3.07415	0.337889	2.80211	0.911507	1876.5	45.6209	1877.4	26.3071	1879.15	22.7839	1879.15	22.7839	99.8592		1889.44	9.37545
11	255.283	51869.7	2.97195	8.65847	1.03851	5.11734	3.22327	0.321494	3.05139	0.946675	1797.02	47.8554	1838.99	27.385	1887.59	18.6946	1887.59	18.6946	95.2021		1891.01	9.0619
66	274.768	8673.67	1.87616	8.64954	1.04187	4.86099	2.52504	0.305074	2.30008	0.910906	1716.42	34.6605	1795.52	21.2675	1889.44	18.7509	1889.44	18.7509	90.8427		1891.11	13.7154
84	397.859	6955	0.692533	8.64198	1.00722	4.75752	4.86609	0.298319	4.76071	0.978344	1682.97	70.5191	1777.43	40.8497	1891.01	18.1238	1891.01	18.1238	88.9981		1892.16	7.64933
40	262.655	5765.61	1.12251	8.6415	1.52436	4.65015	3.33975	0.29157	2.97157	0.88976	1649.37	43.2451	1758.32	27.9164	1891.11	27.4308	1891.11	27.4308	87.2169		1895.32	20.278
78	758.013	5303.24	2.17258	8.63646	0.850352	4.66386	3.02506	0.29226	2.90309	0.959678	1652.81	42.3257	1760.78	25.2981	1892.16	15.2987	1892.16	15.2987	87.3503		1911.6	7.99569
36	239.534	4191.85	2.64688	8.62133	2.25476	5.02012	3.64452	0.314034	2.86331	0.785649	1760.53	44.1127	1822.72	30.8683	1895.32	40.556	1895.32	40.556	92.8882		1914.74	8.6676
1	196.52	37289.8	0.692907	8.54355	0.890916	5.57798	2.58692	0.345783	2.42866	0.938826	1914.43	40.2272	1912.71	22.2775	1911.6	15.9914	1911.6	15.9914	100.148		1915.85	8.95521
39	68.2316	25357.4	0.761648	8.52864	0.96613	5.90271	2.80884	0.365274	2.63746	0.938984	2007.12	45.4894	1961.63	24.3934	1914.74	17.3352	1914.74	17.3352	104.825		1945.02	14.1023
10	342.449	83020.6	3.62244	8.52338	0.998314	5.46343	2.91901	0.337882	2.74299	0.939698	1876.47	44.6576	1894.87	25.0585	1915.85	17.9104	1915.85	17.9104	97.9448		1952.71	8.23145
7	393.584	178407	7.06499	8.38565	1.57752	5.55556	2.89816	0.338027	2.4312	0.838878	1877.17	39.5942	1909.24	24.9435	1945.02	28.2046	1945.02	28.2046	96.5117		1954.2	13.1561
30	89.646	52879.6	0.651062	8.34967	0.92165	6.1302	2.75573	0.371391	2.59704	0.942414	2035.94	45.3393	1994.56	24.0614	1952.71	16.4629	1952.71	16.4629	104.263		2020.76	7.55998
9	83.8173	4692.92	1.03417	8.3427	1.47318	5.63384	3.03079	0.341035	2.64867	0.873919	1891.65	43.4221	1921.29	26.141	1954.2	26.3122	1954.2	26.3122	96.7992		2039.81	8.40105
60	736.557	6673.35	6.43649	8.03632	0.853094	6.21704	2.17584	0.362518	2.00163	0.919933	1994.1	34.3315	2006.85	19.0341	2020.76	15.12	2020.76	15.12	98.6806		2089.88	7.81387
51	431.691	3730.15	2.76875	7.95029	0.950195	6.32343	2.4439	0.364774	2.25162	0.921321	2004.76	38.7955	2021.71	21.4297	2039.81	16.8021	2039.81	16.8021	98.2819		2095.31	18.5358
24	235.487	2411.87	2.61348	7.72772	0.888716	6.02872	2.41837	0.338037	2.24915	0.930029	1877.22	36.6301	1980	21.0651	2089.88	15.6277	2089.88	15.6277	89.8244		2123.37	23.753
52	333.041	2523.71	3.7974	7.70388	2.10953	5.81316	3.19189	0.324945	2.39543	0.750473	1813.83	37.872	1948.37	27.6598	2095.31	37.0716	2095.31	37.0716	86.5665		2191.57	7.51334
23	300.094	1704.06	3.25127	7.58163	2.71153	5.84431	3.40379	0.321502	2.05753	0.60448	1797.06	32.2688	1953.01	29.5202	2123.37	47.506	2123.37	47.506	84.6325		2309.04	10.3085
53	1335.71	17473.7	13.5964	7.29101	0.864386	7.63586	3.19236	0.403955	3.07311	0.962645	2187.23	57.0017	2189.09	28.6688	2191.57	15.0267	2191.57	15.0267	99.8017		2410.02	9.01218
56	524.95	52640.2	3.22875	6.81169	1.20098	8.91614	2.37672	0.440676	2.05096	0.862938	2353.67	40.4421	2329.45	21.7024	2309.04	20.617	2309.04	20.617	101.933		2423.07	7.33435
26	253.688	181173	1.13775	6.42057	1.06108	9.80267	2.87341	0.456674	2.67031	0.92932	2424.85	53.9678	2416.4	26.4813	2410.02	18.0244	2410.02	18.0244	100.616		2447.87	8.94726
1	311.794	68340.3	1.76009	6.37138	0.864724	10.2636	2.53335	0.474484	2.3812	0.939941	2503.19	49.3973	2458.83	23.4436	2423.07	14.6687	2423.07	14.6687	103.307		2463.71	8.47416
20	228.224	608078	1.58903	6.2788	1.05734	9.97757	3.58181	0.454558	3.42219	0.955436	2415.48	68.9442	2432.71	33.0678	2447.87	17.8945	2447.87	17.8945	98.6769		2464.48	8.37047
5	171.742	75828.6	2.84156	6.22026	1.00321	10.398	2.8704	0.469294	2.68938	0.936936	2480.47	55.3754	2470.87	26.5945	2463.71	16.9483	2463.71	16.9483	100.68		2467.15	7.38264
43	920.372	19731.9	2.39163	6.21744	0.991008	10.686	2.61641	0.482073	2.42146	0.925492	2536.29	50.7748	2496.21	24.2978	2464.48	16.7409	2464.48	16.7409	102.914		2475.12	7.89825
14	220.194	419799	1.70893	6.20758	0.874316	10.2147	2.83328	0.460082	2.69501	0.951196	2439.92	54.7453	2454.41	26.2092	2467.15	14.7653	2467.15	14.7653	98.8963		2478.98	7.28009
61	589.038	61763.9	2.0787	6.17835	0.936111	10.6777	2.26864	0.478673	2.0665	0.910898	2521.49	43.1248	2495.49	21.0658	2475.12	15.7965	2475.12	15.7965	101.873		2484.29	7.6853
79	829.566	16376.8	1.33468	6.16422	0.863193	10.796	2.17174	0.482871	1.99283	0.917617	2539.76	41.8332	2505.73	20.1847	2478.98	14.5602	2478.98	14.5602	102.452		2495.22	8.44846
46	314.021	99777.9	1.94462	6.14487	0.911545	10.6243	3.12752	0.473698	2.99174	0.956583	2499.76	61.9938	2490.84	29.0324	2484.29	15.3706	2484.29	15.3706	100.623		2510.85	8.55807
16	189.645	567339	1.15985	6.10513	1.00334	10.8174	3.19028	0.479187	3.0284	0.949258	2523.73	63.2451	2507.56	29.6608	2495.22	16.8969	2495.22	16.8969	101.142		2525.28	8.05793
93	372.682	387291	2.55404	6.04868	1.01793	10.5919	2.61488	0.464861	2.40862	0.921119	2460.98	49.2744	2488	24.2652	2510.85	17.1161	2510.85	17.1161	98.014		2535.17	8.35854
85	524.151	207806	2.469	5.99697	0.959816	11.4647	2.49085	0.498866	2.2985	0.922776	2608.92	49.3164	2561.71	23.2667	2525.28	16.1159	2525.28	16.1159	103.312		2535.95	8.14735
75	345.448	113879	1.80627	5.96172	0.996424	11.4743	3.08032	0.496349	2.91471	0.946235	2598.08	62.3276	2562.49	28.7774	2535.17	16.7171	2535.17	16.7171	102.482		2539.87	6.80538
34	353.831	1.75392e+06	2.10551	5.95895	0.971325	11.3795	2.3143	0.492017	2.10059	0.90766	2579.4	44.6553	2554.74	21.604	2535.95	16.2947	2535.95	16.2947	101.713		2576.58	7.25639
109	226.511	44027.3	2.28318	5.94505	0.811838	11.1464	3.19161	0.480815	3.08664	0.967108	2530.81	64.6093	2535.44	29.7476	2539.87	13.6108	2539.87	13.6108	99.6434		2639.56	7.69512
36	141.007	69451.9	1.57643	5.81606	0.868554	11.6145	2.69943	0.490137	2.55589	0.946823	2571.27	54.1953	2573.84	25.2419	2576.58	14.5128	2576.58	14.5128	99.7938		2655.94	8.02516
10	282.03	290125	2.30436	5.60026	0.926858	12.727	2.84565	0.517155	2.69048	0.94547	2687.1	59.1222	2659.66	26.7955	2639.56	15.3902	2639.56	15.3902	101.801		2668.17	9.38695
99	104.673	180939	1.43516	5.54522	0.968098	12.4452	3.23016	0.500736	3.08167	0.954032	2616.96	66.2864	2638.6	30.3681	2655.94	16.0503	2655.94	16.0503	98.5321		2674.01	7.09979
73	101.44	84830.3	1.0747	5.50447	1.13346	13.3112	3.39175	0.531643	3.19675	0.942508	2748.37	71.5331	2701.98	32.0434	2668.17	18.7739	2668.17	18.7739	103.006		2781.63	9.88086
12	106.211	46000.3	0.541812	5.48507	0.857985	12.8865	2.63334	0.512868	2.48964	0.945433	2668.86	54.4089	2671.39	24.8179	2674.01	14.1996	2674.01	14.1996	99.8073		2896.79	7.87766
24	24.1461	15640.1	0.553058	5.13809	1.20594	14.7588	2.98018	0.550225	2.72528	0.914471	2826.11	62.3576	2799.82	28.3474	2781.63	19.7617	2781.63	19.7617	101.599		2995.11	9.60906
71	204.673	52204.4	2.786	4.78764	0.971468	15.1579	2.60736	0.526562	2.41962	0.927997	2726.95	53.8036	2825.21	24.8412	2896.79	15.7553	2896.79	15.7553	94.1369		3021.71	7.51641
2	194.667	463765	8.99091	4.50487	1.19506	18.0998	2.62325	0.591623	2.33522	0.890202	2996	55.958	2995.06	25.2467	2995.11	19.2181	2995.11	19.2181	100.03		3140.99	7.30639
38	282.887	710552	1.38958	4.43091	0.936744	18.9222	2.9538	0.608349	2.80133	0.948381	3063.39	68.3078	3037.86	28.4944	3021.71	15.0328	3021.71	15.0328	101.379		3154.26	7.58842
31	503.371	39253.2	2.11956	4.11193	0.919914	18.6293	3.43041	0.555815	3.30477	0.963373	2849.31	76.1117	3022.82	33.0691	3140.99	14.6128	3140.99	14.6128	90.7138		1447.18	9.98941
40	79.0398	31646	1.03496	4.07771	0.956405	21.4732	2.62322	0.63533	2.44265	0.931167	3170.64	61.1769	3160.2	25.4558	3154.26	15.1768	3154.26	15.1768	100.519		1447.46	9.5595
																					1449.46	9.68128
Baldwin conglomerate, Oconto County, Wisconsin (45.19509º N, 88.43394º W)																					1450.2	9.08542
90	103.758	306802	2.58249	10.9808	1.04916	3.21742	1.95786	0.256348	1.65302	0.844301	1471.13	21.7429	1461.36	15.1671	1447.18	19.9788	1447.18	19.9788	101.655		1452.28	6.53572
108	147.557	21421.1	2.60794	10.9791	1.00405	3.31225	1.5116	0.263864	1.12997	0.74753	1509.58	15.2077	1483.94	11.7898	1447.46	19.119	1447.46	19.119	104.291		1456.46	9.71153
98	107.019	21126.2	2.50473	10.9677	1.01711	3.31197	1.68364	0.263566	1.34169	0.796899	1508.06	18.0411	1483.88	13.1315	1449.46	19.3626	1449.46	19.3626	104.043		1459.07	8.16504
22	271.252	27864.4	2.34605	10.9634	0.954607	3.28629	1.67348	0.26142	1.37451	0.821346	1497.1	18.3631	1477.81	13.0287	1450.2	18.1708	1450.2	18.1708	103.234		1462.44	9.83108
84	191.718	63389.2	3.39897	10.9514	0.686909	3.19673	1.59422	0.254018	1.43864	0.902412	1459.16	18.786	1456.37	12.3309	1452.28	13.0714	1452.28	13.0714	100.474		1463.87	8.27727
134	99.8626	247453	2.34999	10.9274	1.02125	3.34151	1.50932	0.264939	1.11135	0.736325	1515.06	15.0054	1490.81	11.796	1456.46	19.4231	1456.46	19.4231	104.024		1465.6	9.03631
139	499.927	103534	4.61894	10.9124	0.858932	3.29421	1.85613	0.260831	1.64544	0.886487	1494.09	21.9434	1479.69	14.4589	1459.07	16.3301	1459.07	16.3301	102.4		1466.49	9.00867
92	86.3173	74755.7	2.80377	10.893	1.03465	3.22884	1.54276	0.255201	1.14438	0.741772	1465.24	14.9988	1464.11	11.9612	1462.44	19.6622	1462.44	19.6622	100.191		1468.09	9.49482
150	329.264	72236.8	3.08836	10.8848	0.8713	3.28441	1.45316	0.259398	1.16298	0.800308	1486.76	15.4416	1477.36	11.3117	1463.87	16.5545	1463.87	16.5545	101.564		1468.14	8.42547
115	147.598	101200	3.56911	10.875	0.951417	3.30671	1.63311	0.260923	1.32735	0.812774	1494.56	17.7063	1482.64	12.7327	1465.6	18.0726	1465.6	18.0726	101.976		1468.17	7.98478
99	215.05	75956.2	2.28637	10.8698	0.948621	3.16702	1.4031	0.249782	1.03383	0.736818	1437.35	13.3197	1449.16	10.8283	1466.49	18.0173	1466.49	18.0173	98.0128		1470.9	7.84814
86	133.341	14262	3.11772	10.8607	1.00002	3.18867	1.58798	0.251279	1.23355	0.776802	1445.07	15.969	1454.42	12.2752	1468.09	18.9896	1468.09	18.9896	98.432		1471.2	7.86199
125	341.304	36610.5	1.96867	10.8604	0.887409	3.27773	1.64913	0.258289	1.39001	0.842876	1481.08	18.3935	1475.78	12.8312	1468.14	16.8509	1468.14	16.8509	100.882		1472.15	6.31163
103	303.792	120943	2.27766	10.8602	0.840998	3.31952	1.53815	0.261578	1.28788	0.83729	1497.91	17.214	1485.65	12.003	1468.17	15.9696	1468.17	15.9696	102.026		1472.69	6.87689
18	294.103	80490.8	2.06199	10.8447	0.826909	3.3087	1.42459	0.260352	1.16003	0.814292	1491.64	15.4475	1483.11	11.1083	1470.9	15.6963	1470.9	15.6963	101.41		1475.81	8.35208
126	409.362	108030	2.15232	10.843	0.828402	3.29542	1.39335	0.259267	1.12035	0.804068	1486.09	14.8697	1479.97	10.8546	1471.2	15.724	1471.2	15.724	101.012		1476.17	10.717
132	413.13	134490	2.58393	10.8375	0.665133	3.31628	1.52563	0.260776	1.37301	0.89996	1493.81	18.3072	1484.89	11.9026	1472.15	12.6233	1472.15	12.6233	101.471		1476.31	8.84369
93	825.246	101716	3.89864	10.8344	0.724752	3.27422	1.62726	0.257396	1.45695	0.89534	1476.51	19.2262	1474.95	12.6578	1472.69	13.7538	1472.69	13.7538	100.26		1477.65	8.90544
70	144.83	45958.9	3.21497	10.8166	0.880584	3.32557	1.33508	0.261004	1.0035	0.751641	1494.97	13.3896	1487.07	10.4226	1475.81	16.7042	1475.81	16.7042	101.299		1478.83	10.7361
47	115.426	59826.9	2.8529	10.8146	1.12996	3.22871	1.89321	0.253354	1.51903	0.802354	1455.75	19.7942	1464.08	14.6785	1476.17	21.4339	1476.17	21.4339	98.6168		1479.25	10.0579
64	161.303	55124.8	2.44583	10.8138	0.932478	3.31677	1.43188	0.260244	1.08663	0.758883	1491.09	14.4652	1485.01	11.1715	1476.31	17.6874	1476.31	17.6874	101.001		1483.44	8.93283
111	243.133	77611.8	2.0718	10.8061	0.939157	3.23838	1.40928	0.253914	1.05073	0.745585	1458.63	13.7161	1466.4	10.9338	1477.65	17.8109	1477.65	17.8109	98.7129		1485.07	7.89051
89	111.945	134795	3.59862	10.7994	1.13239	3.24666	1.77702	0.254405	1.36949	0.770667	1461.15	17.9047	1468.38	13.7955	1478.83	21.4723	1478.83	21.4723	98.8048		1485.42	9.0814
97	211.64	283736	2.53822	10.797	1.06091	3.23759	1.69529	0.253638	1.3223	0.779983	1457.21	17.2461	1466.21	13.1523	1479.25	20.1158	1479.25	20.1158	98.5103		1485.58	7.69612
46	148.691	53725.8	2.09448	10.7732	0.942776	3.23841	1.58671	0.253142	1.27626	0.80434	1454.66	16.6196	1466.4	12.3106	1483.44	17.8657	1483.44	17.8657	98.06		1485.7	8.08658
29	103.466	25914.4	3.16546	10.7639	0.832954	3.24696	1.52016	0.253591	1.27164	0.836518	1456.97	16.583	1468.45	11.8015	1485.07	15.781	1485.07	15.781	98.1079		1485.84	8.0845
68	6993.13	74078.2	10.4889	10.7619	0.958709	3.43672	2.05477	0.268363	1.8174	0.88448	1532.49	24.7885	1512.84	16.1626	1485.42	18.1628	1485.42	18.1628	103.169		1486.27	6.66077
81	854.204	110672	3.28576	10.761	0.812491	3.23715	1.57436	0.252757	1.34851	0.856543	1452.68	17.5391	1466.1	12.2136	1485.58	15.3922	1485.58	15.3922	97.7849		1486.52	10.0811
146	231.136	45733.7	2.09903	10.7603	0.853724	3.38021	1.64748	0.263911	1.40902	0.855259	1509.82	18.9661	1499.82	12.9099	1485.7	16.1732	1485.7	16.1732	101.623		1488.23	9.35432
20	204.958	38299.1	2.11294	10.7595	0.85352	3.22588	1.46496	0.251843	1.19064	0.812743	1447.97	15.4411	1463.4	11.3555	1485.84	16.169	1485.84	16.169	97.4516		1488.92	11.4083
118	272.338	63954	3.89101	10.7571	0.703254	3.34362	1.1825	0.260976	0.950658	0.803936	1494.83	12.6834	1491.3	9.24293	1486.27	13.3215	1486.27	13.3215	100.576		1489.39	8.95251
106	126.344	73131.5	3.99392	10.7557	1.0644	3.2573	1.60764	0.254204	1.20481	0.749429	1460.12	15.7418	1470.92	12.4901	1486.52	20.1622	1486.52	20.1622	98.224		1489.63	8.31526
124	291.551	32876.5	2.2015	10.7459	0.987892	3.30714	1.62703	0.257861	1.29279	0.794569	1478.89	17.0844	1482.74	12.6857	1488.23	18.7086	1488.23	18.7086	99.372		1489.72	8.4172
40	118.981	30390.4	2.7952	10.7421	1.20491	3.38981	1.98192	0.264211	1.5736	0.793975	1511.35	21.2004	1502.04	15.541	1488.92	22.8167	1488.92	22.8167	101.506		1489.81	8.05592
71	168.72	74500.1	2.44408	10.7394	0.945605	3.2366	1.77549	0.252207	1.50273	0.846375	1449.85	19.5111	1465.97	13.7736	1489.39	17.905	1489.39	17.905	97.3449		1491.12	9.54021
137	205.554	72231.3	3.08901	10.738	0.878327	3.27093	1.50691	0.254849	1.22447	0.812569	1463.44	16.0309	1474.17	11.7189	1489.63	16.6305	1489.63	16.6305	98.2413		1491.71	8.18441
79	675.849	1.00688e+06	4.36644	10.7375	0.889105	3.31439	1.48395	0.258223	1.18811	0.800639	1480.74	15.7186	1484.44	11.5758	1489.72	16.8344	1489.72	16.8344	99.3974		1491.72	7.98345
15	289.79	108643	2.30482	10.737	0.850955	3.23898	1.49905	0.252336	1.23411	0.823262	1450.51	16.0299	1466.54	11.6309	1489.81	16.1118	1489.81	16.1118	97.3624		1492.13	6.85512
27	130.845	78757.7	2.56632	10.7296	1.00791	3.28919	1.70902	0.256071	1.38017	0.807579	1469.71	18.1383	1478.5	13.3081	1491.12	19.0804	1491.12	19.0804	98.5639		1492.62	8.78399
63	248.615	148918	1.96052	10.7262	0.864747	3.28302	1.37732	0.25551	1.07201	0.778335	1466.83	14.0639	1477.04	10.7202	1491.71	16.3688	1491.71	16.3688	98.3316		1494.39	8.04691
75	278.086	41443.2	2.14357	10.7262	0.843514	3.24863	1.82109	0.252833	1.61396	0.886259	1453.07	20.9968	1468.85	14.1398	1491.72	15.9669	1491.72	15.9669	97.4092		1495.94	6.82961
129	469.303	2.7962e+06	4.12477	10.7238	0.724341	3.24151	1.38809	0.252223	1.18411	0.853052	1449.93	15.375	1467.15	10.7719	1492.13	13.7102	1492.13	13.7102	97.1719		1495.97	6.19485
52	284.696	63637.2	2.18542	10.7211	0.928207	3.25611	1.45132	0.253295	1.11569	0.768742	1455.44	14.5357	1470.64	11.2745	1492.62	17.568	1492.62	17.568	97.5094		1496.22	8.34706
36	798.465	139036	3.69231	10.7111	0.850523	3.29642	1.62569	0.25619	1.38546	0.852225	1470.32	18.2146	1480.21	12.6656	1494.39	16.0938	1494.39	16.0938	98.3893		1496.42	8.31287
55	101.212	850649	3.06367	10.7023	0.722013	3.30694	1.53684	0.256797	1.35667	0.88277	1473.43	17.8698	1482.69	11.9822	1495.94	13.6592	1495.94	13.6592	98.4952		1496.96	8.05459
59	785.535	586294	3.96954	10.7021	0.654912	3.42467	1.28992	0.265935	1.1113	0.861524	1520.14	15.0492	1510.07	10.1378	1495.97	12.3897	1495.97	12.3897	101.616		1497.57	8.03211
11	680.99	63807.5	1.70664	10.7007	0.882463	3.34064	1.39448	0.259376	1.07974	0.774296	1486.65	14.3355	1490.6	10.8977	1496.22	16.6941	1496.22	16.6941	99.3603		1498.99	6.99441
145	898.049	85868.2	4.03654	10.6996	0.878872	3.38726	1.60683	0.262968	1.34517	0.837158	1505.01	18.0554	1501.45	12.5973	1496.42	16.6257	1496.42	16.6257	100.574		1499.42	7.90705
24	267.511	226343	2.46313	10.6965	0.851628	3.28796	1.53547	0.255185	1.27765	0.832092	1465.16	16.7448	1478.21	11.9555	1496.96	16.1092	1496.96	16.1092	97.8754		1500.36	7.06305
50	462.643	91796.5	3.17099	10.6931	0.84932	3.36049	1.5624	0.260731	1.31139	0.839344	1493.58	17.4832	1495.24	12.2267	1497.57	16.0642	1497.57	16.0642	99.7337		1500.81	6.42413
33	150.008	63401.2	2.16169	10.685	0.739736	3.28064	1.83723	0.254344	1.68172	0.91536	1460.84	21.9827	1476.47	14.2979	1498.99	13.9888	1498.99	13.9888	97.4548		1501.68	7.4239
19	124.136	32856.4	3.22789	10.6826	0.836303	3.32343	1.33623	0.257603	1.04217	0.779931	1477.57	13.7615	1486.57	10.43	1499.42	15.8141	1499.42	15.8141	98.5422		1506.06	7.79827
23	928.083	323514	6.90973	10.6773	0.747132	3.3724	1.5391	0.261269	1.34559	0.874273	1496.33	17.9686	1498.01	12.0541	1500.36	14.1261	1500.36	14.1261	99.7315		1509.03	10.3596
147	352.889	63184.4	3.13396	10.6748	0.679589	3.30791	1.32888	0.256213	1.14197	0.859344	1470.44	15.0145	1482.92	10.3614	1500.81	12.8483	1500.81	12.8483	97.9764		1510.16	7.5853
119	624.019	189917	1.83587	10.6698	0.78544	3.36853	1.85044	0.260787	1.67548	0.905446	1493.87	22.341	1497.11	14.4891	1501.68	14.8478	1501.68	14.8478	99.4797		1510.43	8.13371
60	319.419	36981.7	2.44403	10.6451	0.825611	3.28611	1.36703	0.253817	1.08956	0.797026	1458.13	14.2186	1477.77	10.6425	1506.06	15.5965	1506.06	15.5965	96.8174		1511.33	7.86968
131	527.823	1.7467e+06	3.16255	10.6284	1.09717	3.36434	1.6467	0.259452	1.22794	0.745698	1487.04	16.3069	1496.13	12.8899	1509.03	20.7192	1509.03	20.7192	98.5428		1511.7	6.8319
48	1087.04	61382.8	1.54913	10.6221	0.803504	3.3284	1.53091	0.256526	1.30309	0.851191	1472.04	17.1496	1487.74	11.9538	1510.16	15.1706	1510.16	15.1706	97.476		1514.74	7.17489
110	1334.75	158868	1.72963	10.6205	0.861619	3.32285	1.5625	0.256062	1.30347	0.834218	1469.66	17.1299	1486.43	12.1959	1510.43	16.2674	1510.43	16.2674	97.3009		1517.12	8.34809
65	235.849	43719.9	2.76127	10.6155	0.833753	3.31056	1.53398	0.254994	1.28761	0.839393	1464.18	16.8652	1483.54	11.9629	1511.33	15.7394	1511.33	15.7394	96.8801		1519.33	6.57268
56	923.723	223282	3.06049	10.6134	0.723855	3.30263	1.2731	0.254333	1.04729	0.822631	1460.78	13.6892	1481.67	9.92277	1511.7	13.6638	1511.7	13.6638	96.6319		1520.63	8.91157
43	885.274	86585.4	3.03083	10.5963	0.760498	3.62183	1.57266	0.278465	1.37655	0.875303	1583.63	19.3283	1554.34	12.5141	1514.74	14.3498	1514.74	14.3498	104.547		1522.38	9.57808
107	156.607	49632.4	2.48936	10.583	0.885111	3.33851	1.52052	0.256358	1.23635	0.813109	1471.18	16.2628	1490.11	11.881	1517.12	16.6962	1517.12	16.6962	96.9719		1522.72	9.03642
54	601.009	338423	2.53305	10.5706	0.697099	3.33033	1.25859	0.255431	1.04791	0.832602	1466.42	13.7443	1488.19	9.82868	1519.33	13.1454	1519.33	13.1454	96.5177		1524.66	9.07722
76	533.937	32979.1	4.77356	10.5633	0.945286	3.34443	1.58871	0.256335	1.27689	0.803725	1471.06	16.7948	1491.49	12.419	1520.63	17.8231	1520.63	17.8231	96.7404		1525.77	10.4807
39	119.994	20849.1	2.40058	10.5535	1.01621	3.35728	1.49744	0.257081	1.09984	0.734478	1474.89	14.4995	1494.49	11.7158	1522.38	19.1562	1522.38	19.1562	96.8807		1527.91	8.53736
73	626.433	63547.1	2.52249	10.5516	0.958793	3.42763	1.81861	0.262421	1.54534	0.849734	1502.21	20.708	1510.75	14.2962	1522.72	18.0728	1522.72	18.0728	98.6532		1531.77	9.04472
25	773.018	66528.6	3.83283	10.5407	0.963369	3.40602	1.51431	0.260498	1.16836	0.771544	1492.39	15.5653	1505.78	11.8868	1524.66	18.1544	1524.66	18.1544	97.883		1533.63	7.51137
1	434.511	27895.8	1.84537	10.5345	1.11247	3.27319	1.8579	0.250191	1.48802	0.800915	1439.46	19.1965	1474.7	14.451	1525.77	20.9615	1525.77	20.9615	94.3431		1533.87	6.81637
112	452.035	51540.4	3.10552	10.5225	0.906471	3.34623	1.67349	0.255483	1.40672	0.840594	1466.69	18.4536	1491.91	13.0834	1527.91	17.0747	1527.91	17.0747	95.9931		1534.74	9.31152
12	627.905	64168.3	3.37363	10.501	0.960823	3.40603	1.57897	0.259518	1.25298	0.793543	1487.38	16.6428	1505.79	12.3944	1531.77	18.0894	1531.77	18.0894	97.1019		1551.27	7.70036
35	165.839	14257.4	3.04683	10.4907	0.798151	3.34264	1.3438	0.254436	1.08109	0.804501	1461.31	14.1355	1491.07	10.503	1533.63	15.0227	1533.63	15.0227	95.2849		1573.1	6.57132
74	1977.43	532589	2.97335	10.4893	0.724333	3.39846	1.3246	0.258652	1.10901	0.837243	1482.94	14.6915	1504.04	10.3923	1533.87	13.6327	1533.87	13.6327	96.6794		1578.62	8.43648
88	101.155	66271.6	2.75659	10.4845	0.98955	3.36289	1.8799	0.255827	1.59838	0.850247	1468.46	20.9902	1495.8	14.7141	1534.74	18.623	1534.74	18.623	95.6813		1584.99	6.91827
82	1006.58	37433.8	7.84693	10.3926	0.820054	3.48923	1.37065	0.263114	1.09826	0.801274	1505.75	14.7478	1524.78	10.8176	1551.27	15.4007	1551.27	15.4007	97.0656		1589.89	8.15612
5	3471.87	20052.5	4.31468	10.2724	0.701911	3.03693	1.92557	0.226357	1.79308	0.931195	1315.38	21.3352	1416.95	14.7097	1573.1	13.1426	1573.1	13.1426	83.617		1590.99	7.41954
10	539.687	18014.5	4.65662	10.2421	0.901755	3.56644	1.64016	0.265042	1.37002	0.835299	1515.58	18.5036	1542.1	13.0076	1578.62	16.873	1578.62	16.873	96.0072		1594.95	15.3466
149	277.721	18052.7	2.3707	10.2073	0.740112	3.42613	1.36099	0.253749	1.14215	0.839211	1457.78	14.9017	1510.41	10.6974	1584.99	13.8365	1584.99	13.8365	91.9743		1598.93	8.6992
34	707.117	17265.4	2.14154	10.1806	0.873074	3.53291	1.31299	0.260971	0.980649	0.746885	1494.81	13.0834	1534.61	10.3911	1589.89	16.3122	1589.89	16.3122	94.0196		1602.41	8.85767
72	1948.27	45536	2.19915	10.1746	0.794264	3.4354	1.66101	0.253619	1.4588	0.878261	1457.11	19.0253	1512.53	13.0638	1590.99	14.8391	1590.99	14.8391	91.5851		1605.05	10.3097
138	493.977	22847.2	2.95749	10.153	1.6438	3.53592	2.1251	0.260487	1.34684	0.633777	1492.34	17.9425	1535.29	16.8223	1594.95	30.6933	1594.95	30.6933	93.5663		1618.31	7.11953
66	1295.42	17948.3	3.58989	10.1314	0.93221	3.53723	2.02811	0.260029	1.80117	0.888102	1489.99	23.9615	1535.58	16.0557	1598.93	17.3984	1598.93	17.3984	93.1868		1619.24	7.04891
85	1151.97	17280.2	7.08203	10.1125	0.949621	3.58668	2.0041	0.263172	1.76484	0.880612	1506.05	23.7029	1546.59	15.914	1602.41	17.7153	1602.41	17.7153	93.9865		1624.17	8.63469
32	309.281	10723.1	2.86458	10.0982	1.10575	3.45184	1.52127	0.25292	1.04479	0.686789	1453.52	13.596	1516.29	11.9776	1605.05	20.6194	1605.05	20.6194	90.5587		1666.41	10.3748
78	1308.4	18730.3	3.87297	10.0266	0.764944	3.44234	1.73953	0.250436	1.56231	0.898124	1440.72	20.1708	1514.12	13.6877	1618.31	14.2391	1618.31	14.2391	89.0263		1669.09	17.1531
3	377.063	49038.8	3.8264	10.0216	0.757448	3.58033	1.66167	0.260345	1.479	0.890065	1491.61	19.6946	1545.18	13.1894	1619.24	14.0978	1619.24	14.0978	92.118		1673.05	7.21738
2	482.011	13354.2	4.57808	9.99507	0.928414	3.51068	1.59188	0.254604	1.29311	0.812315	1462.17	16.9166	1529.62	12.5809	1624.17	17.2694	1624.17	17.2694	90.0259		1737.58	7.49903
51	495.186	15597.5	3.98593	9.77004	1.12155	3.94391	1.71998	0.279583	1.30402	0.758158	1589.26	18.3673	1622.74	13.9328	1666.41	20.7497	1666.41	20.7497	95.3703		1739.77	8.9273
57	300.008	12867.9	2.63054	9.75592	1.85477	3.56312	2.14388	0.252224	1.0752	0.501519	1449.93	13.9608	1541.36	16.9996	1669.09	34.3061	1669.09	34.3061	86.8698		1742.77	8.71169
7	1279.52	271170	4.91395	9.73505	0.78092	4.1078	1.65115	0.290159	1.4548	0.881086	1642.32	21.092	1655.85	13.4839	1673.05	14.4348	1673.05	14.4348	98.1634		1765.53	6.79382
120	398.082	33717.1	1.31715	9.39971	0.818026	4.70848	1.50131	0.321132	1.25888	0.838518	1795.25	19.7261	1768.75	12.5743	1737.58	14.9981	1737.58	14.9981	103.319		1771.92	6.93728
105	307.588	145919	3.91156	9.38852	0.974069	4.651	1.87025	0.316834	1.59657	0.853665	1774.25	24.7633	1758.47	15.6309	1739.77	17.8546	1739.77	17.8546	101.982		1772.19	8.07358
13	123.292	1.31193e+06	3.42661	9.37313	0.950903	4.5238	1.6999	0.307663	1.40906	0.828906	1729.2	21.3712	1735.36	14.1367	1742.77	17.4234	1742.77	17.4234	99.2213		1777.26	7.87537
136	268.894	228670	1.55191	9.25729	0.743598	4.93883	1.22076	0.331738	0.96815	0.793072	1846.8	15.5467	1808.92	10.3086	1765.53	13.5876	1765.53	13.5876	104.604		1782.53	7.60333
87	793.607	92107.8	3.20579	9.22493	0.76	4.65496	1.67236	0.311578	1.48969	0.890773	1748.47	22.8134	1759.19	13.9789	1771.92	13.8746	1771.92	13.8746	98.6763		1783.21	8.66239
69	261.924	79505.2	3.61672	9.22359	0.884493	4.70245	1.74434	0.314711	1.50347	0.861909	1763.85	23.2004	1767.68	14.6068	1772.19	16.1472	1772.19	16.1472	99.5294		1790.26	6.87363
130	1496.97	200681	6.02169	9.19798	0.863323	4.8314	1.59694	0.322443	1.34346	0.841273	1801.65	21.1165	1790.38	13.4352	1777.26	15.7507	1777.26	15.7507	101.372		1792.41	6.70987
91	358.139	100711	3.32289	9.17146	0.834047	4.7714	1.45996	0.31752	1.19826	0.820754	1777.61	18.616	1779.88	12.2562	1782.53	15.2067	1782.53	15.2067	99.7241		1842.8	9.07737
143	437.377	80575.5	3.22907	9.16802	0.950282	4.77089	1.57586	0.317368	1.2571	0.797722	1776.86	19.5229	1779.79	13.229	1783.21	17.3248	1783.21	17.3248	99.6441		1844.73	9.33211
100	1260.77	48082.9	3.54376	9.13261	0.754732	4.77374	1.44258	0.316331	1.2294	0.852221	1771.78	19.0453	1780.29	12.1113	1790.26	13.7473	1790.26	13.7473	98.9679		1859.94	8.0644
122	1274.11	164047	2.66075	9.12184	0.736949	4.98785	1.37862	0.330129	1.16511	0.845133	1839.01	18.6414	1817.26	11.661	1792.41	13.4197	1792.41	13.4197	102.6		1872.16	7.49187
94	930.649	65322.9	3.31103	8.87214	1.00309	5.23444	1.66288	0.336966	1.32627	0.797571	1872.06	21.5485	1858.24	14.1772	1842.8	18.1547	1842.8	18.1547	101.588		1883.71	7.6875
41	721.37	72118.1	2.60669	8.86267	1.03148	5.16025	1.72017	0.331836	1.37661	0.800273	1847.27	22.1107	1846.09	14.632	1844.73	18.6642	1844.73	18.6642	100.138		1886.65	5.61265
102	958.117	548269	3.23496	8.7884	0.893019	5.21672	1.66113	0.332656	1.40067	0.843203	1851.24	22.5389	1855.35	14.1546	1859.94	16.1288	1859.94	16.1288	99.5321		1890.32	7.44027
49	1882.7	244132	2.0825	8.72909	0.830747	5.04454	1.63074	0.319505	1.40327	0.860513	1787.31	21.9043	1826.83	13.8198	1872.16	14.9837	1872.16	14.9837	95.4677		1909.62	7.09235
67	1311.2	62504.2	3.64481	8.67335	0.85373	5.38306	1.60776	0.338769	1.36237	0.847368	1880.75	22.2235	1882.16	13.7682	1883.71	15.375	1883.71	15.375	99.8425		2690.29	5.7569
101	2586.68	120189	3.09058	8.65922	0.623564	5.13254	1.45781	0.322477	1.31771	0.903901	1801.82	20.7134	1841.51	12.3892	1886.65	11.2253	1886.65	11.2253	95.5036		1773.16	8.26647
37	1903.89	341150	3.208	8.64158	0.826932	5.31581	1.47615	0.333311	1.22278	0.82836	1854.41	19.7055	1871.41	12.616	1890.32	14.8805	1890.32	14.8805	98.1005		1791.68	2.68757
109	1712.91	41040.1	3.43512	8.54926	0.78998	5.26043	1.52702	0.326315	1.3068	0.855783	1820.5	20.7261	1862.47	13.0291	1909.62	14.1847	1909.62	14.1847	95.3329		2516.07	8.55429
148	204.445	4.10101e+06	2.52418	5.42896	0.696798	11.3002	1.47332	0.445135	1.29813	0.881092	2373.59	25.7764	2548.22	13.7445	2690.29	11.5138	2690.29	11.5138	88.2278		1886.84	2.61196
																					1731.65	1.2757
1. Analyses with >10% uncertainty (1-sigma) in 206Pb/238U age are not included.																					1772.46	4.25306
2. Analyses with >10% uncertainty (1-sigma) in 206Pb/207Pb age are not included, unless 206Pb/238U age is <400 Ma.																					1789.85	10.2362
3. Best age is determined from 206Pb/238U age for analyses with 206Pb/238U age <900 Ma and from 206Pb/207Pb age for analyses with 206Pb/238Uage >900 Ma.																					1799.3	14.9049
4. Concordance is based on 206Pb/238U age / 206Pb/207Pb age. Value is not reported for 206Pb/238U ages <400 Ma because of large uncertainty in 206Pb/207Pb age.																					1771.85	5.7715
5. Analyses with 206Pb/238U age >400 Ma and with >20% discordance (<80% concordance) are not included.																					1770.19	3.34037
6. Analyses with 206Pb/238U age >400 Ma and with >5% reverse discordance (<105% concordance) are not included.																					1832.22	5.38959
7. All uncertainties are reported at the 1-sigma level, and include only measurement errors.																					1773.77	6.27067
8. Systematic errors are as follows (at 2-sigma level): [sample 1: xxx% (206Pb/238U) & xxx% (206Pb/207Pb)] These values are reported on cells U1 and W1 of E2agecalc.																					1769.57	6.01063
9. Analyses conducted by LA-ICPMS, as described by Gehrels et al. (2008) and Gehrels and Pecha (2014).																					1767.84	3.3007
10. U concentration and U/Th are calibrated relative to FC-1 zircon standard and are accurate to ~20%.																					1768.04	6.1891
11. Common Pb correction is from measured 204Pb with common Pb composition interpreted from Stacey and Kramers (1975).																					1868.91	7.80783
12. Common Pb composition assigned uncertainties of 1.5 for 206Pb/204Pb, 0.3 for 207Pb/204Pb, and 2.0 for 208Pb/204Pb.																					1773.73	2.40957
13. U/Pb and 206Pb/207Pb fractionation is calibrated relative to fragments of large Sri Lanka zircons and individual crystals of FC-1, and R33.																					1787.58	6.14438
14. U decay constants and composition as follows: 238U = 9.8485 x 10-10, 235U = 1.55125 x 10-10, 238U/235U = 137.82.																					1764.36	4.30421
15. U-Th disequilibrium correction is applied to 206/238 ages assuming a value of 2.3 for the magma.																					1781.76	3.03124
16. Weighted mean and concordia plots determined with Isoplot (Ludwig, 2008).																					1860.3	9.5374
																					1766.45	2.83363
Stewart et al., 2018																					2585.98	1.5968
Supplementary table: U-Pb geochronologic analyses for sample 13ES13, lower Baraboo quartzite (fig. 7).																					1861.88	6.80633
							Isotope ratios						Apparent ages (Ma)								2656.81	2.96551
																					1778.06	3.45182
Analysis	U	206Pb	U/Th	206Pb*	±	207Pb*	±	206Pb*	±	error	206Pb*	±	207Pb*	±	206Pb*	±	Best age	±	Conc		1783.33	4.62128
	(ppm)	204Pb		207Pb*	(%)	235U*	(%)	238U	(%)	corr.	238U*	(Ma)	235U	(Ma)	207Pb*	(Ma)	(Ma)	(Ma)	(%)		1781.78	5.92747
																					1793.41	9.49
13ES13-1 <>	82.9336	87162.1	2.58651	9.22271	0.90573	4.86158	2.14133	0.325188	1.94035	0.906141	1815.02	30.6943	1795.62	18.0353	1773.16	16.5329	1773.16	16.5329	102.361		1793.93	10.8116
13ES13-2 <>	113.257	114458	2.16948	9.12947	0.295114	4.80902	0.6267	0.31842	0.552866	0.882186	1782.01	8.60767	1786.48	5.26802	1791.68	5.37513	1791.68	5.37513	99.4602		1783.05	4.75988
13ES13-4 <>	29.5279	80720.7	1.86228	6.02991	1.018	10.8613	1.58227	0.474999	1.2113	0.765545	2505.45	25.1462	2511.33	14.7126	2516.07	17.1086	2516.07	17.1086	99.5776		2605.8	3.74531
13ES13-5 <>	76.2764	254329	1.98402	8.66206	0.290256	5.39999	0.958805	0.339244	0.913816	0.953077	1883.03	14.9221	1884.85	8.21454	1886.84	5.22391	1886.84	5.22391	99.7982		1726.01	4.77844
13ES13-6 <>	620.999	128762	20.1341	9.43428	0.139042	4.35059	2.25067	0.297684	2.24637	0.99809	1679.81	33.2192	1703.01	18.5839	1731.65	2.5514	1731.65	2.5514	97.0067		1805.29	4.91493
13ES13-7 <>	93.2896	242870	1.73461	9.22623	0.466011	4.76955	0.769009	0.319154	0.611726	0.795474	1785.6	9.5407	1779.55	6.4551	1772.46	8.50611	1772.46	8.50611	100.741		1763.69	7.82145
13ES13-8 <>	155.439	4525.73	0.212997	9.13866	1.12382	4.69437	4.90685	0.311142	4.77642	0.973419	1746.33	73.0716	1766.24	41.0962	1789.85	20.4724	1789.85	20.4724	97.5684		1777.11	6.33805
13ES13-9 <>	194.426	4844.38	1.7003	9.09135	1.63829	3.95957	3.70796	0.261081	3.3264	0.897098	1495.37	44.3948	1625.95	30.0674	1799.3	29.8098	1799.3	29.8098	83.1084		1781.84	4.22105
13ES13-10 <>	158.966	24085.3	1.37409	9.2293	0.6323	4.17044	1.66784	0.279157	1.54334	0.92535	1587.12	21.7123	1668.23	13.6604	1771.85	11.543	1771.85	11.543	89.5738		1926.4	5.28214
13ES13-11 <>	123.899	210882	1.67913	9.23772	0.365827	4.83834	1.18598	0.324161	1.12815	0.951237	1810.02	17.8035	1791.59	9.97994	1770.19	6.68074	1770.19	6.68074	102.25		1771.3	14.7193
13ES13-13 <>	175.169	129459	2.71067	8.92803	0.594756	5.1364	2.33404	0.332593	2.25699	0.966989	1850.94	36.3135	1842.15	19.8399	1832.22	10.7792	1832.22	10.7792	101.022		1793.59	6.54905
13ES13-14 <>	131.751	130981	2.36408	9.21962	0.68714	4.79998	1.02758	0.32096	0.76404	0.743534	1794.42	11.9673	1784.9	8.63512	1773.77	12.5413	1773.77	12.5413	101.164		1840.53	3.51551
13ES13-15 <>	113.604	112907	3.72262	9.24086	0.658308	4.82037	1.53975	0.323066	1.39193	0.903996	1804.68	21.9102	1788.46	12.9489	1769.57	12.0213	1769.57	12.0213	101.985		1768.98	4.44822
13ES13-16 <>	125.074	163703	2.41029	9.24961	0.361376	4.75427	0.810547	0.318938	0.72553	0.895111	1784.54	11.3098	1776.86	6.79999	1767.84	6.6014	1767.84	6.6014	100.945		1773.23	10.6152
13ES13-17 <>	106.09	94490.2	2.29327	9.24857	0.677723	4.80136	1.2162	0.322061	1.00986	0.830346	1799.79	15.8588	1785.14	10.2208	1768.04	12.3782	1768.04	12.3782	101.795		1798.61	3.22699
13ES13-18 <>	62.0076	64408.6	1.52125	8.74866	0.865547	5.48188	1.24985	0.347832	0.901633	0.721396	1924.24	14.9997	1897.76	10.7332	1868.91	15.6157	1868.91	15.6157	102.96		1798.46	4.31449
13ES13-20 <>	218.278	52946.4	2.2835	9.2198	0.264005	4.96085	0.54012	0.331724	0.471202	0.872402	1846.73	7.56638	1812.68	4.56427	1773.73	4.81914	1773.73	4.81914	104.116		1767.63	4.43046
13ES13-21 <>	84.833	185260	3.61726	9.15005	0.67445	4.80786	0.987253	0.319061	0.720962	0.730271	1785.14	11.2419	1786.27	8.29858	1787.58	12.2888	1787.58	12.2888	99.8638		1780.4	1.91726
13ES13-22 <>	131.446	130598	3.15094	9.26725	0.47104	4.76311	1.43332	0.32014	1.35371	0.944457	1790.41	21.1624	1778.42	12.0289	1764.36	8.60842	1764.36	8.60842	101.477		1755.57	10.627
13ES13-23 <>	131.863	85665.3	2.38112	9.17931	0.332544	4.8131	0.951968	0.32043	0.891996	0.937002	1791.83	13.954	1787.19	8.00347	1781.76	6.06247	1781.76	6.06247	100.565		1771.94	6.14791
13ES13-24 <>	77.4594	33389.2	1.11228	8.79048	1.05615	5.32814	1.34155	0.339693	0.827221	0.616617	1885.19	13.5214	1873.39	11.4698	1860.3	19.0748	1860.3	19.0748	101.338		1775.79	5.79775
13ES13-25 <>	82.6827	94641.3	2.81739	9.25663	0.310186	4.75598	0.561974	0.319295	0.468614	0.833872	1786.28	7.31111	1777.16	4.71487	1766.45	5.66726	1766.45	5.66726	101.123		1861.55	3.97795
13ES13-27 <>	69.6944	148445	1.15719	5.78344	0.191309	11.637	0.456697	0.488121	0.414696	0.908033	2562.54	8.76875	2575.65	4.27029	2585.98	3.1936	2585.98	3.1936	99.0938		1760.67	4.35103
13ES13-28 <>	70.3281	142623	3.67062	8.78281	0.753902	5.29433	1.41233	0.337243	1.19428	0.845611	1873.4	19.416	1867.95	12.0628	1861.88	13.6127	1861.88	13.6127	100.619		1764.39	3.92676
13ES13-29 <>	137.261	59993.7	1.71564	5.54233	0.357703	11.8171	3.10214	0.475008	3.08145	0.99333	2505.48	63.9725	2590.02	29.049	2656.81	5.93102	2656.81	5.93102	94.3043		1775.59	6.38495
13ES13-30 <>	181.333	59843.1	1.62112	9.19795	0.378499	4.77281	1.04623	0.318394	0.975361	0.932265	1781.88	15.1846	1780.13	8.78322	1778.06	6.90365	1778.06	6.90365	100.215		1804.12	4.9513
13ES13-31 <>	111.818	214937	2.07221	9.1714	0.507025	4.82343	0.714411	0.320841	0.503298	0.704494	1793.84	7.88104	1788.99	6.00842	1783.33	9.24255	1783.33	9.24255	100.589		1798.52	3.55771
13ES13-32 <>	109.601	134690	1.91804	9.17921	0.65018	4.85391	0.918384	0.323144	0.64861	0.706252	1805.06	10.2115	1794.29	7.73229	1781.78	11.8549	1781.78	11.8549	101.307		1760.33	8.13017
13ES13-33 <>	64.6219	55554.7	2.07409	9.12079	1.04237	4.85672	1.14288	0.321273	0.468664	0.410073	1795.94	7.34619	1794.78	9.62349	1793.41	18.98	1793.41	18.98	100.141		1860.32	4.07192
13ES13-34 <>	36.3531	43663.9	2.16548	9.11821	1.18759	4.94292	2.16619	0.326883	1.81163	0.836322	1823.26	28.7707	1809.62	18.296	1793.93	21.6233	1793.93	21.6233	101.635		1879.97	3.89489
13ES13-36 <>	87.8545	154513	2.52045	9.17279	0.522211	4.75479	0.852741	0.316324	0.674139	0.790555	1771.75	10.4433	1776.95	7.15412	1783.05	9.51976	1783.05	9.51976	99.3662		1769.1	6.66773
13ES13-37 <>	66.4672	219782	1.62663	5.71508	0.449562	11.9626	1.10003	0.495845	1.00397	0.912677	2595.92	21.4536	2601.48	10.3082	2605.8	7.49062	2605.8	7.49062	99.6207		1877.19	3.08357
13ES13-38 <>	301.992	49922.1	2.35071	9.4633	0.520442	3.92183	4.29455	0.269172	4.26289	0.99263	1536.6	58.2834	1618.2	34.7599	1726.01	9.55688	1726.01	9.55688	89.0261		1854.38	15.4127
13ES13-39 <>	117.586	19065.7	3.42671	9.06145	0.540599	4.63227	1.99055	0.304432	1.91574	0.962415	1713.25	28.8222	1755.1	16.6247	1805.29	9.82987	1805.29	9.82987	94.9017		1769.73	3.99068
13ES13-40 <>	78.2254	85560.1	1.60273	9.27062	0.855874	4.73593	1.31999	0.318429	1.00492	0.761306	1782.05	15.6461	1773.62	11.0668	1763.69	15.6429	1763.69	15.6429	101.041		1761.61	5.85237
13ES13-41 <>	111.147	190716	1.6168	9.20274	0.694808	4.7864	1.43091	0.319467	1.2509	0.874198	1787.12	19.524	1782.52	12.0189	1777.11	12.6761	1777.11	12.6761	100.563		1754.7	6.58689
13ES13-42 <>	108.323	152552	2.23028	9.17888	0.463039	4.82187	0.817424	0.320999	0.67363	0.824089	1794.61	10.5522	1788.72	6.87443	1781.84	8.4421	1781.84	8.4421	100.716		1763.16	9.3572
13ES13-43 <>	73.446	61744.3	4.9227	8.47334	0.589638	5.76094	1.25692	0.354035	1.11004	0.883138	1953.84	18.71	1940.56	10.8753	1926.4	10.5643	1926.4	10.5643	101.424		1777.39	4.92721
13ES13-44 <>	64.169	97727.4	1.64183	9.23209	1.61221	4.73124	3.01678	0.316792	2.54984	0.845221	1774.04	39.5452	1772.79	25.2923	1771.3	29.4385	1771.3	29.4385	100.155		1793.08	6.62694
13ES13-45 <>	147.943	12491.1	0.855855	9.11993	0.719294	4.5001	2.26675	0.297654	2.1496	0.948317	1679.67	31.7857	1730.99	18.8337	1793.59	13.0981	1793.59	13.0981	93.6485		1875.68	4.72285
13ES13-48 <>	151.587	226490	1.73282	8.88716	0.388342	5.16288	0.926298	0.332777	0.840962	0.907875	1851.83	13.536	1846.52	7.87948	1840.53	7.03103	1840.53	7.03103	100.614		1768.92	6.43207
13ES13-49 <>	161.708	37625.8	1.95949	9.24384	0.48708	4.60482	3.18474	0.30872	3.14728	0.988235	1734.4	47.8607	1750.14	26.5739	1768.98	8.89644	1768.98	8.89644	98.0456		1782.6	7.76754
13ES13-50 <>	71.5602	159508	1.41978	9.22233	1.16304	4.84523	1.47889	0.324081	0.91348	0.61768	1809.63	14.4131	1792.79	12.448	1773.23	21.2305	1773.23	21.2305	102.053		1886.04	4.89296
13ES13-51 <>	171.702	271572	2.59976	9.09479	0.354649	4.98904	0.709621	0.329085	0.614643	0.866157	1833.95	9.81064	1817.47	6.00235	1798.61	6.45397	1798.61	6.45397	101.965		1856.53	6.34118
13ES13-52 <>	181.539	16242.3	2.55473	9.09556	0.474156	4.6895	3.09216	0.309354	3.05559	0.988173	1737.52	46.5393	1765.37	25.8844	1798.46	8.62898	1798.46	8.62898	96.6121		1776.79	10.7346
13ES13-53 <>	122.443	32044.5	3.20837	9.25067	0.485054	4.32657	1.56409	0.290279	1.48697	0.950698	1642.92	21.5653	1698.44	12.9006	1767.63	8.86092	1767.63	8.86092	92.945		1781.84	5.57395
13ES13-54 <>	281.336	198099	6.26973	9.18613	0.210336	4.91447	2.40073	0.327422	2.3915	0.996155	1825.87	38.0271	1804.74	20.2578	1780.4	3.83452	1780.4	3.83452	102.554		1800.46	5.41567
13ES13-55 <>	62.0067	138704	2.4419	9.3119	1.16178	4.77734	1.29626	0.322643	0.574928	0.443529	1802.63	9.04091	1780.92	10.8842	1755.57	21.2541	1755.57	21.2541	102.681		1782.26	4.83527
13ES13-56 <>	109.041	85836.5	1.05224	9.22886	0.673538	4.73422	1.16169	0.31688	0.946507	0.814766	1774.47	14.6822	1773.32	9.73886	1771.94	12.2958	1771.94	12.2958	100.143		1773.7	4.55002
13ES13-57 <>	180.774	138851	2.13984	9.20941	0.635484	4.88338	0.870177	0.326175	0.594447	0.683134	1819.82	9.42501	1799.39	7.33396	1775.79	11.5955	1775.79	11.5955	102.479		1843	16.4271
13ES13-58 <>	169.021	46575.6	3.2228	8.7844	0.440646	4.94824	6.16153	0.315255	6.14575	0.997439	1766.51	94.9679	1810.53	52.0909	1861.55	7.95591	1861.55	7.95591	94.8947		1779.91	6.15395
13ES13-59 <>	128.173	44638.8	2.9402	9.28598	0.475945	4.79814	6.55813	0.323146	6.54083	0.997363	1805.08	102.986	1784.57	55.1596	1760.67	8.70206	1760.67	8.70206	102.522		1759.94	5.59844
13ES13-60 <>	217.437	14598	1.59191	9.26707	0.429736	4.27276	6.07554	0.287177	6.06032	0.997495	1627.41	87.1668	1688.13	50.0307	1764.39	7.85353	1764.39	7.85353	92.2361		2519	3.71808
13ES13-61 <>	140.212	30137.9	1.57531	9.21043	0.699817	4.58714	1.95422	0.306423	1.82462	0.933681	1723.08	27.5887	1746.93	16.2927	1775.59	12.7699	1775.59	12.7699	97.0427		1768.09	4.35225
13ES13-63 <>	108.911	31567.5	1.15455	9.06729	0.54452	4.77134	1.35325	0.313774	1.23886	0.915473	1759.25	19.0738	1779.87	11.3603	1804.12	9.9026	1804.12	9.9026	97.513		1758.13	3.6199
13ES13-64 <>	163.447	324390	3.27261	9.09526	0.390991	4.94724	1.77253	0.326345	1.72887	0.975368	1820.64	27.4224	1810.35	14.9728	1798.52	7.11543	1798.52	7.11543	101.23		1784.36	6.35817
13ES13-65 <>	88.4821	78036.6	1.60274	9.28767	0.889283	4.71169	1.26995	0.317382	0.906621	0.7139	1776.93	14.0804	1769.32	10.6377	1760.33	16.2603	1760.33	16.2603	100.943		1764.55	5.82641
13ES13-66 <>	97.5559	127868	1.53417	8.79037	0.450986	5.3206	0.744154	0.339208	0.591925	0.795435	1882.86	9.66505	1872.18	6.36063	1860.32	8.14385	1860.32	8.14385	101.211		1776.11	5.8713
13ES13-67 <>	128.037	129625	1.66518	8.69518	0.432303	5.53764	1.13518	0.349222	1.04964	0.924647	1930.88	17.5137	1906.46	9.76361	1879.97	7.78978	1879.97	7.78978	102.708		1848.01	5.10423
13ES13-68 <>	106.459	155176	1.73952	9.24319	0.730221	4.81338	1.16454	0.322679	0.907151	0.77898	1802.8	14.2664	1787.24	9.7908	1769.1	13.3355	1769.1	13.3355	101.905		1737.66	5.00169
13ES13-69 <>	139.064	163598	1.64315	8.70859	0.342139	5.46863	1.25503	0.345402	1.20749	0.962123	1912.61	19.9837	1895.68	10.7737	1877.19	6.16714	1877.19	6.16714	101.887		1753.72	16.7833
13ES13-70 <>	41.9535	26618.3	3.27522	8.81934	1.70541	5.26318	2.01346	0.336653	1.07033	0.531586	1870.55	17.378	1862.91	17.1818	1854.38	30.8255	1854.38	30.8255	100.872		1756	11.4169
13ES13-71 <>	147.816	157672	1.67549	9.24006	0.437021	4.7572	0.625397	0.318805	0.447364	0.715328	1783.89	6.97146	1777.38	5.24722	1769.73	7.98136	1769.73	7.98136	100.8		1756.86	7.33113
13ES13-73 <>	167.912	14515.7	1.51183	9.28116	0.640244	3.81438	2.85657	0.256759	2.7839	0.974559	1473.24	36.6648	1595.78	22.9844	1761.61	11.7047	1761.61	11.7047	83.63		1757.88	8.79131
13ES13-74 <>	171.36	26105.3	1.65752	9.31634	0.720073	4.34103	1.27386	0.293317	1.05082	0.824907	1658.08	15.3631	1701.19	10.5132	1754.7	13.1738	1754.7	13.1738	94.494		1760.04	1.27464
13ES13-75 <>	51.7426	36683.3	1.93389	9.2733	1.02395	4.58404	1.56577	0.308305	1.18455	0.75653	1732.36	17.9947	1746.37	13.0521	1763.16	18.7144	1763.16	18.7144	98.253		1760.14	5.69916
13ES13-76 <>	175.998	14504.8	2.08579	9.20132	0.540188	3.91445	9.46221	0.261228	9.44678	0.998369	1496.12	126.149	1616.67	76.673	1777.39	9.85441	1777.39	9.85441	84.1751		1761.11	1.08921
13ES13-78 <>	158.417	12841	1.21894	9.12247	0.727802	4.42237	6.81053	0.292594	6.77153	0.994274	1654.48	98.8196	1716.54	56.4578	1793.08	13.2539	1793.08	13.2539	92.2705		1761.92	7.58713
13ES13-79 <>	79.9223	38756.6	2.00764	8.71587	0.523928	4.92985	2.35171	0.311633	2.2926	0.974867	1748.74	35.1142	1807.38	19.8545	1875.68	9.44569	1875.68	9.44569	93.2321		1762.14	5.47954
13ES13-80 <>	156.634	218432	2.81607	9.24413	0.704401	4.77269	1.04555	0.319984	0.77265	0.738991	1789.65	12.0743	1780.11	8.77747	1768.92	12.8641	1768.92	12.8641	101.172		1763.9	7.89962
13ES13-81 <>	73.1003	112691	1.94675	9.17506	0.852065	4.7892	1.21336	0.318692	0.86384	0.711942	1783.34	13.458	1783.01	10.1924	1782.6	15.5351	1782.6	15.5351	100.041		1766.07	3.42661
13ES13-83 <>	74.0153	83323.2	1.22578	8.66589	0.543583	5.47463	0.662628	0.344086	0.378938	0.571871	1906.3	6.25354	1896.63	5.68911	1886.04	9.78592	1886.04	9.78592	101.074		1766.69	6.26641
13ES13-84 <>	76.7195	51560.4	1.37769	8.80883	0.701936	5.16104	1.06473	0.329727	0.800581	0.751912	1837.06	12.7972	1846.22	9.05656	1856.53	12.6824	1856.53	12.6824	98.9509		1766.82	11.5456
13ES13-85 <>	83.6666	62608.7	1.76063	9.20435	1.17664	4.85688	1.4192	0.324227	0.793506	0.559122	1810.34	12.5244	1794.81	11.9505	1776.79	21.4693	1776.79	21.4693	101.888		1768.68	6.11398
13ES13-86 <>	92.5134	143660	1.76633	9.17889	0.611414	4.86242	0.804606	0.323699	0.523033	0.650048	1807.77	8.24517	1795.77	6.77634	1781.84	11.1479	1781.84	11.1479	101.455		1771.85	2.64096
13ES13-87 <>	192.945	25780	1.84224	9.08555	0.59532	4.46778	1.97828	0.294403	1.88658	0.953647	1663.49	27.6611	1725.01	16.4148	1800.46	10.8313	1800.46	10.8313	92.3927		1773.16	5.161
13ES13-89 <>	150.833	133384	3.01332	9.1768	0.530429	4.82338	0.830938	0.321027	0.639612	0.769747	1794.74	10.0199	1788.98	6.98847	1782.26	9.67054	1782.26	9.67054	100.701		1775.15	8.10432
13ES13-90 <>	91.015	169918	3.00863	9.21996	0.498618	4.79609	0.662533	0.320712	0.436268	0.658486	1793.21	6.82935	1784.21	5.56665	1773.7	9.10004	1773.7	9.10004	101.1		1775.43	15.0687
13ES13-91 <>	36.4697	56371.2	2.41142	8.87504	1.81522	5.14395	2.05566	0.331105	0.964719	0.4693	1843.73	15.4694	1843.39	17.4772	1843	32.8543	1843	32.8543	100.04		1775.61	12.8219
13ES13-92 <>	100.999	198356	2.07664	9.18861	0.674863	4.86008	0.923404	0.323886	0.630266	0.682546	1808.68	9.93994	1795.36	7.77624	1779.91	12.3079	1779.91	12.3079	101.616		1779.67	6.20988
13ES13-93 <>	119.202	176718	2.86619	9.28965	0.612338	4.6643	0.803	0.314256	0.519473	0.646914	1761.62	8.00728	1760.86	6.71417	1759.94	11.1969	1759.94	11.1969	100.095		1779.91	3.18959
13ES13-94 <>	77.4257	136631	1.21811	6.01941	0.442527	11.1184	0.709822	0.485397	0.554994	0.781877	2550.73	11.6913	2533.11	6.61276	2519	7.43615	2519	7.43615	101.26		1780.63	5.19472
13ES13-95 <>	199.01	30782.9	2.49665	9.24834	0.476519	4.51665	6.12163	0.302956	6.10305	0.996966	1705.95	91.4838	1734.04	50.9333	1768.09	8.70451	1768.09	8.70451	96.4856		1781.39	3.51783
13ES13-96 <>	161.348	47818.7	4.95242	9.29887	0.395844	4.74299	0.813504	0.319876	0.710701	0.873629	1789.12	11.1033	1774.87	6.82198	1758.13	7.2398	1758.13	7.2398	101.763		1781.5	8.4841
13ES13-97 <>	170.692	15917.5	1.51386	9.16621	0.697637	4.07967	2.11777	0.271215	1.99957	0.944184	1546.96	27.5012	1650.25	17.2719	1784.36	12.7163	1784.36	12.7163	86.6956		1781.89	2.8425
13ES13-98 <>	125.85	49773	2.37647	9.26629	0.637637	4.73979	0.89219	0.31854	0.624037	0.699444	1782.59	9.7185	1774.3	7.48098	1764.55	11.6528	1764.55	11.6528	101.023		1781.97	8.30269
13ES13-99 <>	104.111	21926.8	1.71605	9.2078	0.64357	4.58097	1.52413	0.305923	1.38159	0.906478	1720.61	20.8638	1745.81	12.7035	1776.11	11.7426	1776.11	11.7426	96.8753		1782.27	9.44929
13ES13-100 <>	92.7761	77291.7	2.24467	8.85049	0.564454	5.19207	0.880731	0.333278	0.676075	0.76763	1854.25	10.8943	1851.32	7.49869	1848.01	10.2085	1848.01	10.2085	100.338		1782.37	7.78422
																					1782.79	9.55048
Supplementary table: U-Pb geochronologic analyses for sample 03ES14, Dake quartzite (fig. 7).																					1782.84	5.36101
							Isotope ratios						Apparent ages (Ma)								1782.89	11.5274
																					1783.2	7.929
Analysis	U	206Pb	U/Th	206Pb*	±	207Pb*	±	206Pb*	±	error	206Pb*	±	207Pb*	±	206Pb*	±	Best age	±	Conc		1783.42	5.04725
	(ppm)	204Pb		207Pb*	(%)	235U*	(%)	238U	(%)	corr.	238U*	(Ma)	235U	(Ma)	207Pb*	(Ma)	(Ma)	(Ma)	(%)		1783.75	7.81918
																					1784.16	8.97126
03ES14-66 <>	88.6315	105587	1.62799	9.4034	0.54565	4.65297	1.39766	0.317332	1.28674	0.920644	1776.69	19.9816	1758.83	11.6816	1737.66	10.0034	1737.66	10.0034	102.246		1784.21	4.46906
03ES14-112 <>	51.0465	70247.5	2.00343	9.32129	1.83434	4.68418	1.94298	0.316671	0.640592	0.329696	1773.45	9.93187	1764.42	16.2593	1753.72	33.5667	1753.72	33.5667	101.125		1785.41	4.29553
03ES14-72 <>	50.6483	87043.6	2.13581	9.30971	1.24819	4.70978	1.72412	0.318006	1.18937	0.689843	1779.99	18.4993	1768.98	14.4414	1756	22.8339	1756	22.8339	101.366		1786.15	14.056
03ES14-49 <>	110.098	106788	2.64648	9.30533	0.80154	4.64268	1.00934	0.313328	0.613427	0.607753	1757.06	9.43424	1756.98	8.43255	1756.86	14.6623	1756.86	14.6623	100.012		1787.82	1.80503
03ES14-74 <>	51.3879	89279.7	2.089	9.30015	0.961399	4.66113	2.66317	0.314398	2.48358	0.932566	1762.31	38.2961	1760.29	22.2683	1757.88	17.5826	1757.88	17.5826	100.252		1789.59	22.0722
03ES14-17 <>	740.682	85396.3	2.07441	9.28915	0.139419	4.52771	2.4278	0.305038	2.42379	0.99835	1716.24	36.5216	1736.08	20.1945	1760.04	2.54928	1760.04	2.54928	97.5115		1790.62	10.1327
03ES14-94 <>	125.686	160386	1.5852	9.28865	0.623369	4.71635	0.838002	0.317729	0.560052	0.668319	1778.63	8.70518	1770.15	7.02052	1760.14	11.3983	1760.14	11.3983	101.05		1792.95	6.13833
03ES14-109 <>	795.137	318740	1.92623	9.28371	0.119153	4.72895	0.953307	0.318409	0.945831	0.992158	1781.95	14.7254	1772.38	7.99027	1761.11	2.17842	1761.11	2.17842	101.183		1794.68	10.6909
03ES14-116 <>	66.3465	102115	2.32407	9.27959	0.830052	4.61337	1.00879	0.310489	0.573291	0.568298	1743.11	8.75601	1751.69	8.41847	1761.92	15.1743	1761.92	15.1743	98.9323		1795.03	12.0456
03ES14-80 <>	106.243	184854	3.01439	9.27851	0.599497	4.77988	1.035	0.321658	0.843702	0.815169	1797.82	13.2368	1781.37	8.69121	1762.14	10.9591	1762.14	10.9591	102.025		1795.97	4.16571
03ES14-21 <>	101.519	97700.9	1.30063	9.26956	0.86445	4.77128	1.39054	0.320769	1.08918	0.783282	1793.49	17.0524	1779.86	11.6733	1763.9	15.7992	1763.9	15.7992	101.677		1796.03	7.05056
03ES14-36 <>	181.136	203094	1.38924	9.25855	0.375079	4.80224	1.51517	0.322467	1.46801	0.968875	1801.77	23.0754	1785.29	12.7339	1766.07	6.85322	1766.07	6.85322	102.021		1796.33	5.87913
03ES14-25 <>	73.6223	77877.5	1.79019	9.25542	0.685973	4.68002	1.12334	0.314154	0.889575	0.791899	1761.12	13.7088	1763.67	9.39838	1766.69	12.5328	1766.69	12.5328	99.6846		1797.06	11.7753
03ES14-84 <>	55.3521	73861.1	2.30362	9.25477	1.26396	4.74595	1.56712	0.318557	0.926435	0.59117	1782.68	14.4285	1775.39	13.1437	1766.82	23.0913	1766.82	23.0913	100.898		1797.75	14.125
03ES14-118 <>	82.3173	99266.8	1.81063	9.24534	0.669552	4.69602	1.80654	0.314885	1.67788	0.928782	1764.7	25.9028	1766.53	15.1241	1768.68	12.228	1768.68	12.228	99.7749		1797.78	16.032
03ES14-111 <>	161.977	440035	2.33514	9.22933	0.289289	4.76628	0.514668	0.319043	0.42567	0.827076	1785.05	6.63714	1778.98	4.3196	1771.85	5.28192	1771.85	5.28192	100.745		1799.37	6.39426
03ES14-7 <>	68.9466	73205	1.10911	9.22267	0.56552	4.75997	1.62298	0.31839	1.52126	0.937329	1781.86	23.6832	1777.87	13.6192	1773.16	10.322	1773.16	10.322	100.491		1801	30.7957
03ES14-101 <>	52.0805	68864.7	1.6455	9.21266	0.888184	4.77894	1.59709	0.319312	1.32733	0.831097	1786.37	20.7094	1781.21	13.4112	1775.15	16.2086	1775.15	16.2086	100.632		1802.11	10.2601
03ES14-8 <>	34.1556	32598.8	2.23519	9.21125	1.65132	4.74026	1.88682	0.316679	0.912818	0.483786	1773.49	14.1528	1774.39	15.8222	1775.43	30.1373	1775.43	30.1373	99.891		1802.89	42.3605
03ES14-32 <>	66.9734	81119.9	2.3982	9.2103	1.40518	4.93184	2.27494	0.329444	1.78909	0.786431	1835.69	28.5801	1807.72	19.2075	1775.61	25.6438	1775.61	25.6438	103.383		1803.04	6.56914
03ES14-73 <>	117.059	119917	1.79695	9.18983	0.680975	4.79497	1.45348	0.319589	1.28408	0.883456	1787.72	20.0478	1784.02	12.2122	1779.67	12.4198	1779.67	12.4198	100.452		1804.21	4.34732
03ES14-76 <>	186.756	372881	2.66845	9.18864	0.349832	4.78615	2.35622	0.31896	2.33011	0.988917	1784.65	36.3248	1782.47	19.7923	1779.91	6.37919	1779.91	6.37919	100.266		1805.19	35.12
03ES14-82 <>	173.343	134212	1.31919	9.18498	0.569738	4.82005	0.691624	0.321092	0.3921	0.566926	1795.06	6.14343	1788.4	5.81607	1780.63	10.3894	1780.63	10.3894	100.81		1807.01	10.1826
03ES14-37 <>	180.469	33945.1	1.24525	9.18117	0.385893	4.57406	1.51283	0.304578	1.46278	0.96692	1713.97	22.0155	1744.55	12.6058	1781.39	7.03567	1781.39	7.03567	96.2154		1807.33	6.72504
03ES14-119 <>	88.7664	144767	1.89805	9.18059	0.930531	4.79735	1.15691	0.319427	0.687433	0.594195	1786.93	10.7284	1784.44	9.72112	1781.5	16.9682	1781.5	16.9682	100.304		1808.15	2.6947
03ES14-12 <>	139.701	114660	1.96222	9.17864	0.31185	4.84331	1.48623	0.322418	1.45315	0.977739	1801.53	22.8392	1792.45	12.509	1781.89	5.68499	1781.89	5.68499	101.102		1808.47	9.39684
03ES14-33 <>	60.4739	61399.3	1.70798	9.17824	0.910689	4.88833	1.33709	0.325401	0.979008	0.732193	1816.05	15.4945	1800.25	11.2714	1781.97	16.6054	1781.97	16.6054	101.912		1810.04	10.7793
03ES14-108 <>	80.4969	95864.7	2.39485	9.17675	1.03647	4.80886	1.11108	0.320059	0.400276	0.360259	1790.02	6.25625	1786.45	9.33981	1782.27	18.8986	1782.27	18.8986	100.435		1810.29	21.5952
03ES14-91 <>	88.3956	184981	3.27379	9.17625	0.85387	4.83052	1.14049	0.321483	0.756063	0.662926	1796.97	11.8569	1790.23	9.5945	1782.37	15.5684	1782.37	15.5684	100.819		1811.29	7.6399
03ES14-3 <>	80.4532	95380.6	1.83998	9.17412	1.04764	4.81647	1.14034	0.320473	0.450375	0.394946	1792.04	7.04619	1787.78	9.58844	1782.79	19.101	1782.79	19.101	100.519		1812.79	14.9898
03ES14-83 <>	93.8291	82467.2	4.43246	9.17386	0.588133	4.81924	0.842544	0.320648	0.603308	0.716055	1792.89	9.44277	1788.26	7.08503	1782.84	10.722	1782.84	10.722	100.564		1813.21	8.64361
03ES14-28 <>	29.5794	25869.4	2.52458	9.1736	1.26448	4.86937	1.45312	0.323975	0.71599	0.492728	1809.11	11.2943	1796.97	12.2414	1782.89	23.0548	1782.89	23.0548	101.471		1813.54	6.39425
03ES14-67 <>	68.7119	72212.4	1.65757	9.17208	0.869838	4.95301	1.18266	0.329485	0.801297	0.677535	1835.88	12.8016	1811.34	9.99167	1783.2	15.858	1783.2	15.858	102.955		1813.87	5.18338
03ES14-81 <>	124.775	95170.3	2.43051	9.17097	0.553757	4.75509	0.687135	0.316281	0.406826	0.592061	1771.54	6.30161	1777.01	5.76478	1783.42	10.0945	1783.42	10.0945	99.3342		1815.96	10.7615
03ES14-1 <>	64.4997	70362.5	1.4496	9.16927	0.857851	4.78877	0.94951	0.318462	0.407015	0.428658	1782.21	6.33751	1782.93	7.97583	1783.75	15.6384	1783.75	15.6384	99.9136		1816.43	16.3707
03ES14-42 <>	100.238	104996	2.38521	9.16724	0.984275	4.83357	1.07329	0.32137	0.427976	0.39875	1796.42	6.70995	1790.76	9.03013	1784.16	17.9425	1784.16	17.9425	100.687		1816.51	33.6549
03ES14-22 <>	134.292	10238.1	0.986884	9.16697	0.490381	4.4986	1.92238	0.29909	1.85878	0.966917	1686.79	27.5874	1730.71	15.9709	1784.21	8.93811	1784.21	8.93811	94.54		1817.53	3.11591
03ES14-13 <>	124.44	211504	1.31249	9.16094	0.471414	4.88678	1.1116	0.324685	1.00669	0.905622	1812.57	15.9061	1799.98	9.36992	1785.41	8.59107	1785.41	8.59107	101.521		1818.28	10.834
03ES14-98 <>	42.232	86657.4	0.938161	9.15724	1.54241	4.80477	1.79669	0.319107	0.921444	0.512856	1785.37	14.3696	1785.73	15.1016	1786.15	28.112	1786.15	28.112	99.9562		1818.98	14.3943
03ES14-71 <>	155.117	270948	4.19173	9.14882	0.198111	4.85179	1.20823	0.321933	1.19188	0.986466	1799.16	18.7115	1793.93	10.1721	1787.82	3.61007	1787.82	3.61007	100.634		1820.44	5.77427
03ES14-57 <>	29.6604	36260.9	1.67613	9.13996	2.42291	4.91071	2.7625	0.325527	1.32699	0.480361	1816.67	21.0081	1804.1	23.3084	1789.59	44.1444	1789.59	44.1444	101.513		1826.09	7.38691
03ES14-69 <>	66.7881	95521.6	1.64847	9.1348	1.11256	4.886	1.61501	0.323706	1.17067	0.724868	1807.8	18.455	1799.84	13.6133	1790.62	20.2653	1790.62	20.2653	100.96		1828.94	13.0511
03ES14-18 <>	84.6646	98015.8	2.7826	9.12309	0.674132	4.91245	1.20905	0.325042	1.00367	0.830129	1814.3	15.8715	1804.4	10.2005	1792.95	12.2767	1792.95	12.2767	101.191		1828.99	9.90452
03ES14-14 <>	64.4596	105712	2.75958	9.11444	1.17443	4.99416	3.04774	0.330135	2.81237	0.922772	1839.03	44.998	1818.33	25.7891	1794.68	21.3818	1794.68	21.3818	102.471		1829.72	4.75559
03ES14-113 <>	169.936	10785.5	0.832513	9.11271	1.32339	4.1435	5.76033	0.273851	5.60625	0.973251	1560.32	77.6974	1662.93	47.1517	1795.03	24.0913	1795.03	24.0913	86.9245		1831.99	5.56405
03ES14-27A <>	114.218	128102	1.7854	9.10797	0.457666	4.89274	1.53694	0.323201	1.46722	0.954636	1805.34	23.1027	1801.01	12.9582	1795.97	8.33142	1795.97	8.33142	100.522		1832.78	5.47951
03ES14-103 <>	177.456	11213.4	0.396761	9.10771	0.774607	4.41774	1.36069	0.291815	1.11868	0.822146	1650.59	16.2904	1715.67	11.2665	1796.03	14.1011	1796.03	14.1011	91.9025		1833.81	6.38914
03ES14-48 <>	141.077	90550.7	2.04725	9.1062	0.645935	4.8402	0.860908	0.319668	0.56915	0.661104	1788.11	8.8875	1791.91	7.24486	1796.33	11.7583	1796.33	11.7583	99.5424		1835.1	3.18053
03ES14-45 <>	71.171	100088	1.87289	9.10254	1.29402	4.95532	2.75679	0.32714	2.43422	0.882989	1824.5	38.6811	1811.73	23.2957	1797.06	23.5506	1797.06	23.5506	101.527		1835.68	11.8581
03ES14-10 <>	53.6196	73264.9	1.97656	9.09909	1.5523	4.94835	3.47166	0.326555	3.10529	0.894467	1821.66	49.2787	1810.54	29.3327	1797.75	28.25	1797.75	28.25	101.33		1841.25	10.2525
03ES14-70 <>	34.0278	22707.6	2.52582	9.09894	1.76182	4.88156	2.08383	0.322142	1.11281	0.53402	1800.18	17.4787	1799.08	17.5631	1797.78	32.064	1797.78	32.064	100.134		1847.74	10.3086
03ES14-5 <>	90.7485	43820.4	2.26214	9.09098	0.702795	4.90973	0.828439	0.323718	0.438622	0.529457	1807.86	6.91482	1803.93	6.98855	1799.37	12.7885	1799.37	12.7885	100.472		1853.1	36.827
03ES14-38 <>	19.8907	19337.9	3.24407	9.08287	3.38488	5.15783	5.01421	0.339773	3.69931	0.737766	1885.58	60.4797	1845.69	42.6705	1801	61.5913	1801	61.5913	104.696		1856.84	6.43258
03ES14-102 <>	52.6284	60642.5	1.84977	9.07733	1.12815	4.96333	1.55577	0.326761	1.07131	0.688604	1822.66	17.0087	1813.1	13.1487	1802.11	20.5202	1802.11	20.5202	101.141		1863.4	26.3001
03ES14-44 <>	11.6828	24194.1	3.4036	9.07343	4.65572	4.88455	6.09438	0.321437	3.93266	0.645292	1796.74	61.6689	1799.59	51.4093	1802.89	84.721	1802.89	84.721	99.6591		1865.99	35.2258
03ES14-11 <>	109.249	39315	1.82676	9.07268	0.722341	4.96792	2.32071	0.326896	2.20543	0.950325	1823.32	35.0258	1813.88	19.6181	1803.04	13.1383	1803.04	13.1383	101.125		1876.87	13.1611
03ES14-115 <>	191.712	18421.8	0.941875	9.06685	0.478103	4.13864	2.76494	0.272153	2.72329	0.984936	1551.72	37.5569	1661.97	22.615	1804.21	8.69464	1804.21	8.69464	86.0057		1896.69	17.3986
03ES14-90 <>	18.1173	14565.8	3.82179	9.06194	3.86177	5.00961	3.97845	0.329249	0.956423	0.240401	1834.74	15.2717	1820.95	33.6868	1805.19	70.24	1805.19	70.24	101.637		1903.29	6.90794
03ES14-47 <>	77.8939	99165.3	1.49613	9.05287	1.1203	4.87738	1.31113	0.320237	0.681156	0.51952	1790.89	10.6509	1798.36	11.0483	1807.01	20.3653	1807.01	20.3653	99.1076		2006.59	23.9774
03ES14-51 <>	93.104	184642	1.90565	9.0513	0.739975	4.94066	1.02562	0.324335	0.710167	0.692426	1810.87	11.2118	1809.23	8.6612	1807.33	13.4501	1807.33	13.4501	100.196		2222.3	4.84413
03ES14-79 <>	173.797	785493	2.43734	9.0472	0.296499	4.95368	0.886357	0.325043	0.835294	0.942391	1814.31	13.209	1811.45	7.4884	1808.15	5.3894	1808.15	5.3894	100.341		2341.74	9.24318
03ES14-114 <>	55.476	54220.1	3.28211	9.04561	1.03405	5.04553	1.83647	0.331012	1.51769	0.826415	1843.28	24.3313	1827	15.564	1808.47	18.7937	1808.47	18.7937	101.925		2553.06	3.7952
03ES14-107 <>	44.358	47117.1	2.60975	9.03783	1.18638	4.83419	1.26781	0.316874	0.447034	0.352604	1774.45	6.93427	1790.87	10.667	1810.04	21.5586	1810.04	21.5586	98.0337		2567.78	2.63574
03ES14-35 <>	18.8091	20402.2	2.11231	9.03655	2.3767	4.8976	2.73661	0.320985	1.35658	0.495717	1794.54	21.2497	1801.84	23.0795	1810.29	43.1903	1810.29	43.1903	99.1296		2714.53	8.2211
03ES14-85 <>	70.3929	85102.2	3.15526	9.0316	0.841029	4.96343	1.51887	0.325121	1.26477	0.832702	1814.69	20.0041	1813.11	12.8369	1811.29	15.2798	1811.29	15.2798	100.188		2715.21	1.17668
03ES14-53 <>	41.8918	47095.5	2.45915	9.02415	1.65024	4.90926	1.92691	0.321308	0.99482	0.516278	1796.11	15.5948	1803.85	16.2559	1812.79	29.9795	1812.79	29.9795	99.0801		2733.79	3.0421
03ES14-105 <>	59.6301	80359.1	2.22956	9.02203	0.951727	5.1052	1.29293	0.334054	0.875144	0.67687	1858	14.1267	1836.97	10.9783	1813.21	17.2872	1813.21	17.2872	102.47		2745.62	4.62625
03ES14-29 <>	123.766	131788	4.14465	9.0204	0.704118	5.05719	1.22224	0.330852	0.999045	0.817388	1842.51	16.0106	1828.96	10.3619	1813.54	12.7885	1813.54	12.7885	101.597		2866.63	2.99138
03ES14-15 <>	96.9722	87944.6	1.92863	9.01878	0.570825	5.07943	1.6133	0.332247	1.50894	0.935312	1849.26	24.2587	1832.68	13.6874	1813.87	10.3668	1813.87	10.3668	101.951		2877.08	3.01343
03ES14-78 <>	72.677	93555.7	1.44244	9.00842	1.18528	4.98924	1.41172	0.325973	0.76685	0.543203	1818.83	12.1528	1817.5	11.9416	1815.96	21.523	1815.96	21.523	100.158		2906.4	2.15404
03ES14-4 <>	41.4148	34329	3.51988	9.00608	1.80304	4.88108	1.90411	0.318823	0.61212	0.321472	1783.98	9.53935	1798.99	16.0479	1816.43	32.7414	1816.43	32.7414	98.2137		2912.96	5.76207
03ES14-100 <>	14.2131	16720.4	1.82701	9.00567	3.70584	4.95042	4.06019	0.323338	1.65888	0.408572	1806.01	26.1289	1810.9	34.3112	1816.51	67.3099	1816.51	67.3099	99.4219		3293.07	2.42228
03ES14-89 <>	275.848	80231.6	1.84115	9.00061	0.343339	4.97081	0.695447	0.324487	0.604785	0.869635	1811.61	9.55146	1814.37	5.87886	1817.53	6.23183	1817.53	6.23183	99.6743		3351.5	1.8172
03ES14-55 <>	39.1151	32429.6	2.92452	8.99686	1.19361	5.0358	1.55077	0.328593	0.990043	0.638421	1831.56	15.7848	1825.36	13.1382	1818.28	21.6681	1818.28	21.6681	100.73		1724	17
03ES14-6 <>	53.0176	79717.4	4.15237	8.99339	1.58591	5.07833	1.77008	0.331241	0.786187	0.444153	1844.39	12.6105	1832.49	15.0173	1818.98	28.7886	1818.98	28.7886	101.397		1803	16
03ES14-46 <>	141.25	156909	2.75631	8.98619	0.636394	5.02529	0.856035	0.327518	0.572538	0.668825	1826.34	9.10579	1823.59	7.24957	1820.44	11.5485	1820.44	11.5485	100.324		1834	18
03ES14-58 <>	48.5201	55161.2	3.00846	8.95825	0.814653	4.98924	0.902141	0.324157	0.387554	0.429594	1810	6.116	1817.5	7.63089	1826.09	14.7738	1826.09	14.7738	99.119		1835	18
03ES14-62 <>	43.1222	5352.56	0.249396	8.9442	1.4398	4.68976	2.13122	0.304222	1.57134	0.737293	1712.21	23.6281	1765.41	17.8386	1828.94	26.1022	1828.94	26.1022	93.618		1836	17
03ES14-86 <>	31.0797	56389.6	2.56002	8.94392	1.09264	5.00926	1.23539	0.324938	0.576465	0.466628	1813.8	9.11374	1820.89	10.4568	1828.99	19.809	1828.99	19.809	99.1694		1837	17
03ES14-26 <>	146.366	187665	2.84991	8.94032	0.524633	5.05074	1.45087	0.327496	1.3527	0.932334	1826.24	21.5127	1827.87	12.2978	1829.72	9.51118	1829.72	9.51118	99.8095		1839	15
03ES14-120 <>	105.467	159670	1.59557	8.92913	0.613991	5.03461	0.684033	0.326042	0.301525	0.440804	1819.17	4.77923	1825.16	5.79467	1831.99	11.1281	1831.99	11.1281	99.3001		1841	17
03ES14-60 <>	121.964	5053.41	1.55073	8.92523	0.60472	4.66054	1.95227	0.301685	1.85625	0.950817	1699.66	27.7336	1760.19	16.3225	1832.78	10.959	1832.78	10.959	92.7365		1842	16
03ES14-95 <>	110.72	58525.5	1.34785	8.92019	0.705192	5.03613	2.40459	0.325814	2.29886	0.95603	1818.06	36.4186	1825.42	20.3736	1833.81	12.7783	1833.81	12.7783	99.1415		1844	17
03ES14-75 <>	164.327	106465	1.22506	8.91381	0.351106	5.15552	0.746339	0.3333	0.658595	0.882433	1854.35	10.6131	1845.31	6.34716	1835.1	6.36106	1835.1	6.36106	101.049		1845	18
03ES14-97 <>	44.3936	62695.3	1.6524	8.91096	1.30929	5.19747	1.50093	0.335904	0.73387	0.488943	1866.94	11.8954	1852.2	12.7818	1835.68	23.7162	1835.68	23.7162	101.703		1846	17
03ES14-92 <>	40.472	31909.3	2.87827	8.88361	1.13272	5.33971	1.74589	0.344038	1.32857	0.760969	1906.07	21.923	1875.24	14.9323	1841.25	20.5051	1841.25	20.5051	103.52		1849	15
03ES14-59 <>	51.2684	58382.6	1.38354	8.85181	1.13981	5.18741	1.31934	0.333029	0.664457	0.503627	1853.04	10.7011	1850.55	11.2317	1847.74	20.6173	1847.74	20.6173	100.287		1849	15
03ES14-99 <>	9.80508	15288.8	2.43627	8.8256	4.07298	5.04234	5.3683	0.322757	3.49707	0.651429	1803.18	55.0083	1826.46	45.5181	1853.1	73.654	1853.1	73.654	97.3061		1850	17
03ES14-52 <>	102.5	118585	2.2281	8.80734	0.712078	5.25705	0.856818	0.335803	0.47653	0.556163	1866.45	7.72238	1861.92	7.30968	1856.84	12.8652	1856.84	12.8652	100.517		1851	15
03ES14-77 <>	20.2119	27268.3	2.51149	8.77541	2.91298	5.08025	3.07177	0.323334	0.97485	0.317358	1805.99	15.3546	1832.81	26.0662	1863.4	52.6002	1863.4	52.6002	96.9191		1861	15
03ES14-39 <>	9.34291	10650.3	2.36814	8.76281	3.90212	5.04756	5.3358	0.320792	3.63927	0.682047	1793.6	56.9814	1827.34	45.25	1865.99	70.4515	1865.99	70.4515	96.1203		1862	16
03ES14-17 <>	63.5425	189530	2.37733	8.71014	1.46038	5.3606	1.88522	0.338639	1.1922	0.632395	1880.12	19.4421	1878.58	16.134	1876.87	26.3223	1876.87	26.3223	100.173		1864	18
03ES14-87 <>	56.3945	60767.3	1.18579	8.61478	1.93502	5.42004	2.12244	0.338645	0.872036	0.410865	1880.15	14.2211	1888.03	18.196	1896.69	34.7973	1896.69	34.7973	99.1282		1867	16
03ES14-88 <>	127.295	7334.72	1.17658	8.58317	0.768966	4.88389	5.94931	0.304027	5.89941	0.991612	1711.25	88.6707	1799.48	50.1824	1903.29	13.8159	1903.29	13.8159	89.9098		1873	16
03ES14-106 <>	14.6901	25620.2	0.560509	8.10078	2.70116	6.13803	3.06332	0.360624	1.44489	0.471673	1985.13	24.6871	1995.67	26.7531	2006.59	47.9549	2006.59	47.9549	98.9308		1888	18
03ES14-110 <>	88.0791	5302.74	0.407733	7.16306	0.559231	6.25852	2.76326	0.325139	2.70608	0.979307	1814.78	42.8028	2012.67	24.1967	2222.3	9.68827	2222.3	9.68827	81.662		1890	32
03ES14-43 <>	70.4459	40921.3	0.651183	6.68294	1.0806	8.89684	2.86728	0.431223	2.65587	0.926266	2311.23	51.5856	2327.48	26.178	2341.74	18.4864	2341.74	18.4864	98.697		1913	14
03ES14-117 <>	88.5759	22894.9	0.656942	5.89843	0.45341	10.744	0.907381	0.459622	0.785977	0.866204	2437.89	15.9547	2501.24	8.42907	2553.06	7.59041	2553.06	7.59041	95.4889		1915	16
03ES14-63 <>	137.113	246741	1.24804	5.84677	0.315217	11.5816	0.738536	0.491117	0.667888	0.90434	2575.51	14.1806	2571.19	6.90305	2567.78	5.27148	2567.78	5.27148	100.301		1918	16
03ES14-41 <>	23.0352	19393.5	0.56186	5.35219	0.997022	13.9433	1.63467	0.541249	1.29542	0.792462	2788.67	29.3262	2745.86	15.4887	2714.53	16.4422	2714.53	16.4422	102.732		1919	19
03ES14-54 <>	213.75	167025	1.17906	5.34998	0.142717	13.3931	1.94174	0.519677	1.93649	0.997295	2697.81	42.6895	2707.78	18.3483	2715.21	2.35337	2715.21	2.35337	99.3594		1919	19
03ES14-104 <>	111.252	304070	1.40942	5.28998	0.369811	13.4504	0.660456	0.516044	0.547213	0.828538	2682.38	12.0074	2711.8	6.24216	2733.79	6.08421	2733.79	6.08421	98.1195		1919	15
03ES14-64 <>	79.2767	200843	0.974185	5.25206	0.562667	13.9956	1.25672	0.533112	1.12372	0.894171	2754.55	25.1898	2749.41	11.9101	2745.62	9.2525	2745.62	9.2525	100.325		1920	14
03ES14-23 <>	89.965	198447	1.07139	4.87741	0.367845	16.1109	1.9335	0.569914	1.89818	0.981736	2907.47	44.4218	2883.4	18.4871	2866.63	5.98276	2866.63	5.98276	101.425		1921	16
03ES14-96 <>	47.3726	43877.4	1.13976	4.84616	0.370905	16.2218	5.178	0.570157	5.1647	0.997431	2908.46	120.911	2889.96	49.5629	2877.08	6.02687	2877.08	6.02687	101.091		1921	15
03ES14-40 <>	69.7414	161995	0.78227	4.75936	0.265805	16.6961	0.800503	0.57632	0.755085	0.943263	2933.72	17.7965	2917.55	7.669	2906.4	4.30809	2906.4	4.30809	100.94		1922	14
03ES14-61 <>	21.7841	50908.4	1.22773	4.74014	0.711435	16.7538	1.03375	0.575976	0.749994	0.725511	2932.31	17.6698	2920.85	9.90557	2912.96	11.5241	2912.96	11.5241	100.664		1922	16
03ES14-50 <>	33.2337	120403	1.79203	3.73439	0.308559	24.0353	1.01196	0.65098	0.963775	0.952381	3232.03	24.4975	3269.83	9.86519	3293.07	4.84455	3293.07	4.84455	98.1466		1923	14
03ES14-65 <>	71.708	181992	1.06945	3.59763	0.232515	26.23	0.499732	0.684408	0.442345	0.885164	3361.25	11.5864	3355.15	4.88789	3351.5	3.63441	3351.5	3.63441	100.291		1924	18
																					1924	16
Van Wyck & Norman 2004, Table 1																					1925	15
Laser Ablation ICPMS Analysis of Detrital Zircons from the Baraboo and Hamilton Mounds Quartzites																					1929	18
																					1934	17
Grain	238U/206Pb	1σ	Age (Ma)	1σ	207Pb/206Pb	1σ	Age (Ma)	1σ													1935	17
BARQ1:																					1935	20
173	3.3727	0.1055	1674	46	0.1055	0.001	1724	17													1936	17
54	3.2342	0.1024	1737	48	0.1102	0.001	1803	16													1941	16
133	3.0836	0.0969	1811	49	0.1121	0.0011	1834	18													1942	18
111	3.1526	0.0988	1776	48	0.1122	0.0011	1835	18													1948	16
196	2.9377	0.0928	1889	51	0.1122	0.001	1836	17													1950	29
186	3.1417	0.0987	1781	49	0.1123	0.0011	1837	17													1956	16
223	3.0931	0.0964	1806	49	0.1124	0.0009	1839	15													1971	19
237	3.0488	0.0957	1829	50	0.1126	0.0011	1841	17													1974	17
112	2.9499	0.0925	1882	51	0.1126	0.001	1842	16													1979	17
205	3.0377	0.0955	1834	50	0.1127	0.001	1844	17													1981	15
67	3.201	0.1003	1753	48	0.1128	0.0011	1845	18													2001	20
201	3.1008	0.098	1802	49	0.1129	0.001	1846	17													2004	19
85	2.986	0.0932	1862	50	0.113	0.0009	1849	15													2007	19
93	3.1104	0.0969	1797	49	0.113	0.0009	1849	15													2009	16
222	3.1706	0.0994	1767	48	0.1131	0.0011	1850	17													2047	58
235	3.0257	0.0944	1841	50	0.1132	0.001	1851	15													2057	23
184	3.0989	0.0972	1803	49	0.1138	0.001	1861	15													2068	15
213	2.9112	0.091	1903	51	0.1139	0.001	1862	16													2072	18
179	3.0798	0.0972	1813	50	0.114	0.0012	1864	18													2105	14
119	3.0414	0.0949	1833	50	0.1142	0.001	1867	16													2106	15
96	3.0139	0.0943	1847	50	0.1146	0.001	1873	16													2114	19
182	3.075	0.0984	1815	50	0.1155	0.0011	1888	18													2228	15
135	2.9931	0.0991	1858	53	0.1156	0.0021	1890	32													2286	14
224	2.8514	0.0889	1938	52	0.1172	0.0009	1913	14													2322	15
207	2.942	0.0924	1886	51	0.1173	0.001	1915	16													2333	13
124	2.8994	0.0905	1910	51	0.1175	0.001	1918	16													2417	15
30	2.8425	0.0891	1943	52	0.1175	0.0012	1919	19													2483	14
73	2.9189	0.0917	1899	51	0.1175	0.0012	1919	19													2522	15
172	2.9656	0.0926	1873	51	0.1175	0.001	1919	15													2529	16
22	2.8802	0.0901	1921	52	0.1176	0.0009	1920	14													2529	14
13	2.8752	0.0899	1924	52	0.1176	0.0011	1921	16													2531	14
46	2.9206	0.0913	1898	51	0.1177	0.001	1921	15													2553	14
43	2.7226	0.0848	2017	54	0.1177	0.0009	1922	14													2555	15
192	2.8662	0.0895	1929	52	0.1177	0.001	1922	16													2564	13
132	2.8944	0.0903	1913	51	0.1178	0.0009	1923	14													2578	14
158	2.9621	0.0948	1875	52	0.1178	0.0012	1924	18													2583	13
225	2.8719	0.09	1926	52	0.1178	0.001	1924	16													2583	15
199	2.9369	0.0917	1889	51	0.1179	0.001	1925	15													2599	14
164	2.956	0.0941	1878	52	0.1182	0.0012	1929	18													2608	13
219	2.9994	0.0939	1855	50	0.1185	0.0011	1934	17													2632	31
216	3.0731	0.0962	1816	49	0.1186	0.0011	1935	17													2639	15
221	2.9455	0.0952	1884	53	0.1186	0.0013	1935	20													2646	16
131	2.9446	0.0924	1885	51	0.1187	0.0011	1936	17													2659	13
11	2.7755	0.0868	1984	53	0.119	0.0011	1941	16													2664	16
138	2.9265	0.0929	1895	52	0.1191	0.0012	1942	18													2673	14
143	2.8523	0.0896	1937	52	0.1194	0.0011	1948	16													2675	13
141	2.8612	0.0924	1932	54	0.1196	0.0019	1950	29													2679	13
94	2.9028	0.091	1908	52	0.12	0.0011	1956	16													2681	14
146	2.8377	0.0919	1946	54	0.1201	0.0013	1971	19													2681	13
38	2.8043	0.0879	1966	53	0.1212	0.0011	1974	17													2682	13
236	2.8498	0.0894	1939	52	0.1215	0.0012	1979	17													2688	14
71	2.777	0.0871	1983	53	0.1217	0.001	1981	15													2703	14
234	2.9481	0.0949	1883	52	0.1231	0.0014	2001	20													2717	14
195	2.7762	0.0876	1983	54	0.1232	0.0013	2004	19													2717	15
86	2.8265	0.091	1953	54	0.1234	0.0013	2007	19													2755	14
65	2.9499	0.0927	1882	51	0.1236	0.0011	2009	16													2806	15
203	2.8769	0.1087	1923	63	0.1263	0.0041	2047	58													2906	13
151	2.7382	0.0866	2007	54	0.127	0.0016	2057	23													3053	13
21	2.71	0.0847	2025	54	0.1278	0.0011	2068	15													1716	33
171	2.7809	0.0876	1980	53	0.1281	0.0013	2072	18													1721	27
139	2.6082	0.0815	2092	56	0.1305	0.001	2105	14													1723	30
157	2.748	0.0857	2001	53	0.1306	0.0011	2106	15													1735	45
163	2.7964	0.0882	1971	53	0.1312	0.0014	2114	19													1746	35
95	2.4789	0.0778	2185	58	0.1401	0.0012	2228	15													1753	25
14	2.2862	0.0714	2339	61	0.1448	0.0012	2286	14													1758	40
228	2.3685	0.0757	2270	61	0.148	0.0013	2322	15													1761	30
76	2.3116	0.0721	2317	60	0.1488	0.0012	2333	13													1764	26
180	2.3036	0.0722	2324	61	0.1564	0.0014	2417	15													1772	35
33	2.2242	0.0696	2393	62	0.1627	0.0014	2483	14													1777	25
209	2.2262	0.0696	2392	62	0.1665	0.0015	2522	15													1792	25
140	2.0851	0.066	2526	66	0.1671	0.0016	2529	16													1800	29
47	2.0938	0.0659	2517	65	0.1671	0.0014	2529	14													1805	30
188	2.1106	0.0657	2500	64	0.1673	0.0014	2531	14													1811	34
239	2.0597	0.0649	2551	66	0.1695	0.0015	2553	14													1829	26
177	2.0964	0.0656	2514	65	0.1697	0.0016	2555	15													1833	29
26	2.0521	0.0642	2559	66	0.1706	0.0013	2564	13													1837	30
232	2.2609	0.0713	2361	62	0.172	0.0015	2578	14													1837	29
197	2.0683	0.0645	2542	65	0.1726	0.0013	2583	13													1841	27
220	2.1299	0.068	2481	65	0.1726	0.0016	2583	15													1863	30
166	2.0593	0.0645	2552	66	0.1743	0.0014	2599	14													1865	29
165	2.0329	0.0634	2579	66	0.1752	0.0013	2608	13													1876	30
214	2.0695	0.0713	2541	72	0.1777	0.0033	2632	31													1894	31
162	2.076	0.0654	2535	66	0.1785	0.0016	2639	15													1896	41
212	2.0458	0.0656	2565	68	0.1793	0.0017	2646	16													1905	28
10	1.9324	0.0604	2689	68	0.1807	0.0014	2659	13													1906	27
190	1.992	0.0633	2622	68	0.1812	0.0018	2664	16													1908	29
210	1.9501	0.0611	2669	68	0.1822	0.0016	2673	14													1936	25
160	2.1772	0.0679	2436	63	0.1825	0.0014	2675	13													1957	30
45	1.9051	0.0594	2720	69	0.1829	0.0014	2679	13													1961	28
175	1.9972	0.0624	2617	67	0.1831	0.0016	2681	14													1973	34
8	1.9055	0.0596	2719	69	0.1831	0.0015	2681	13													1992	25
28	1.9316	0.0603	2689	68	0.1831	0.0014	2682	13													1995	30
40	1.915	0.0599	2708	69	0.1838	0.0015	2688	14													2092	30
194	2.0028	0.063	2611	67	0.1856	0.0016	2703	14													2092	25
48	1.9019	0.0596	2724	69	0.1871	0.0016	2717	14													2241	26
61	2.0016	0.0626	2612	67	0.1871	0.0017	2717	15													2317	26
110	1.9275	0.0604	2694	69	0.1915	0.0016	2755	14													2322	25
134	1.8522	0.0598	2783	73	0.1975	0.0018	2806	15													2407	26
123	1.7873	0.0558	2865	72	0.2101	0.0017	2906	13													2548	26
183	1.7504	0.0546	2913	73	0.2301	0.0018	3053	13													2572	29
BARQ2:																					2680	25
103	3.3523	0.0568	1683	25	0.1051	0.0019	1716	33													2833	24
80	3.2531	0.0509	1728	24	0.1054	0.0016	1721	27													2833	24
65	3.2154	0.051	1746	24	0.1055	0.0017	1723	30													2929	24
118	3.3979	0.0576	1663	25	0.1062	0.0026	1735	45													2947	24
84	3.3036	0.0531	1705	24	0.1068	0.002	1746	35													3065	24
104	3.2499	0.0506	1729	24	0.1072	0.0015	1753	25													3178	24
37	3.2321	0.0541	1738	25	0.1075	0.0024	1758	40													1762	24
76	3.1085	0.0491	1798	25	0.1077	0.0017	1761	30													1771	23
119	3.1928	0.05	1756	24	0.1079	0.0016	1764	26													1773	29
62	3.3003	0.0524	1706	24	0.1084	0.0021	1772	35													1785	25
115	3.0893	0.0481	1808	25	0.1087	0.0015	1777	25													1799	24
112	3.0312	0.0464	1838	24	0.1096	0.0015	1792	25													1803	25
71	3.308	0.0525	1703	24	0.1101	0.0018	1800	29													1814	19
79	3.023	0.0473	1842	25	0.1103	0.0018	1805	30													1831	29
18	2.9709	0.0488	1870	27	0.1107	0.002	1811	34													1845	24
61	3.1959	0.05	1755	24	0.1118	0.0016	1829	26													1849	27
105	3.126	0.0501	1789	25	0.1121	0.0018	1833	29													1852	24
107	3.0377	0.048	1834	25	0.1123	0.0019	1837	30													1853	26
100‐1	3.0534	0.0476	1826	25	0.1123	0.0018	1837	29													1856	25
100‐2	2.9869	0.0464	1862	25	0.1125	0.0017	1841	27													1858	23
67	2.9087	0.0473	1905	27	0.1139	0.0019	1863	30													1861	20
69	2.9568	0.0464	1878	26	0.1141	0.0018	1865	29													1862	29
97	2.9533	0.0466	1880	26	0.1148	0.0019	1876	30													1875	21
24	2.7724	0.045	1985	28	0.1159	0.002	1894	31													1876	32
91	3.124	0.0533	1790	27	0.116	0.0026	1896	41													1885	24
4	2.9011	0.0463	1909	26	0.1166	0.0018	1905	28													1887	24
90	2.9735	0.046	1869	25	0.1167	0.0017	1906	27													1891	27
114	2.9806	0.0469	1865	25	0.1168	0.0019	1908	29													1891	27
108	2.9146	0.0451	1902	25	0.1186	0.0016	1936	25													1894	26
99	2.858	0.0462	1934	27	0.1201	0.002	1957	30													1901	26
12	3.1124	0.0504	1796	25	0.1203	0.0019	1961	28													1902	23
83	2.8777	0.0469	1923	27	0.1211	0.0023	1973	34													1942	35
13	2.7071	0.0422	2027	27	0.1224	0.0017	1992	25													2098	68
116	3.003	0.0489	1853	26	0.1227	0.0021	1995	30													2491	18
92	2.6462	0.0414	2066	28	0.1296	0.0022	2092	30													2534	27
93	2.7739	0.0436	1985	27	0.1296	0.0018	2092	25													2541	21
109	2.5157	0.0399	2158	29	0.1411	0.0021	2241	26													2549	21
95	2.2795	0.0361	2345	31	0.1475	0.0022	2317	26													2549	24
2	2.4832	0.039	2181	29	0.1479	0.0022	2322	25													2550	36
23	2.1867	0.0348	2428	32	0.1555	0.0024	2407	26													2556	19
9	2.0576	0.0322	2553	33	0.1691	0.0026	2548	26													2559	22
106	1.9161	0.0322	2707	37	0.1714	0.003	2572	29													2571	18
110	1.9451	0.0303	2674	34	0.183	0.0028	2680	25													2574	17
113	1.8021	0.029	2846	37	0.2008	0.0029	2833	24													2584	29
111‐1	1.8498	0.0289	2786	35	0.2009	0.003	2833	24													2587	21
111‐2	1.712	0.0281	2965	39	0.213	0.0032	2929	24													2593	20
42	1.7599	0.0278	2900	37	0.2154	0.0032	2947	24													2632	19
96	1.6464	0.0265	3060	39	0.2319	0.0034	3065	24													2635	40
38	1.5972	0.0257	3134	40	0.2489	0.0038	3178	24													2641	36
HMQ1:																					2652	21
94	2.9878	0.0751	1861	41	0.1078	0.0014	1762	24													2658	17
38	3.1969	0.0797	1754	38	0.1083	0.0014	1771	23													2664	21
142	2.9727	0.0744	1869	40	0.1084	0.0017	1773	29													2706	19
119	2.9762	0.0736	1867	40	0.1091	0.0015	1785	25													2750	36
10	3.2154	0.0789	1746	37	0.11	0.0014	1799	24													2810	21
52	3.0637	0.0762	1821	39	0.1102	0.0015	1803	25													2835	17
140	2.9308	0.0722	1892	40	0.1109	0.0012	1814	19													2848	18
12	3.0166	0.0759	1846	40	0.1119	0.0018	1831	29													2867	18
28	2.7034	0.1077	2029	69	0.1128	0.0015	1845	24													2871	20
37	2.9904	0.0736	1860	40	0.113	0.0017	1849	27													2877	18
118	2.8835	0.0706	1919	41	0.1132	0.0015	1852	24													2886	16
24	2.9735	0.073	1869	40	0.1133	0.0017	1853	26													2924	43
178	2.9603	0.0722	1876	40	0.1135	0.0016	1856	25													2943	21
121	2.8547	0.0704	1936	41	0.1136	0.0015	1858	23													2980	70
18	2.9283	0.0712	1894	40	0.1138	0.0013	1861	20													2993	20
55	3.0769	0.0758	1814	39	0.1139	0.0018	1862	29													3069	44
78	2.9291	0.0715	1893	40	0.1147	0.0013	1875	21													3117	17
172	2.8927	0.0718	1914	41	0.1148	0.0021	1876	32													3164	20
216	2.8297	0.0705	1951	42	0.1153	0.0016	1885	24													3194	19
56	2.9317	0.0719	1892	40	0.1154	0.0015	1887	24													3275	22
215	2.8794	0.0705	1922	41	0.1157	0.0017	1891	27													3285	17
110	2.8827	0.0718	1920	41	0.1157	0.0017	1891	27													3309	17
122	2.8777	0.0713	1923	41	0.1159	0.0017	1894	26													3310	17
139	2.8662	0.0728	1929	42	0.1163	0.0017	1901	26													3452	17
120	2.9709	0.0734	1870	40	0.1165	0.0015	1902	23													3567	17
165	2.8098	0.0749	1963	45	0.119	0.0023	1942	35
156	2.6645	0.0959	2054	63	0.13	0.005	2098	68
79	2.1155	0.0517	2495	50	0.1634	0.0017	2491	18
65	2.2999	0.07	2327	59	0.1676	0.0027	2534	27
127	1.9212	0.0476	2701	54	0.1684	0.0021	2541	21
168	2.0182	0.0493	2594	52	0.1691	0.0021	2549	21
137	1.9751	0.0497	2641	54	0.1691	0.0024	2549	24
145	2.0636	0.0582	2547	59	0.1693	0.0036	2550	36
63	2.0296	0.0499	2582	52	0.1698	0.0019	2556	19
123	2.1697	0.0542	2444	51	0.1701	0.0022	2559	22
105	2.0133	0.0492	2600	52	0.1713	0.0018	2571	18
106	1.9433	0.0473	2676	53	0.1717	0.0018	2574	17
64	1.9996	0.05	2614	54	0.1727	0.003	2584	29
144	2.0109	0.0501	2602	53	0.173	0.0021	2587	21
104	1.9976	0.0484	2616	52	0.1736	0.002	2593	20
143	1.9268	0.0474	2695	54	0.1777	0.0021	2632	19
213	1.9354	0.0542	2685	61	0.1781	0.0043	2635	40
112	1.9547	0.0495	2663	55	0.1787	0.0038	2641	36
108	1.9051	0.0467	2720	54	0.1799	0.0022	2652	21
39	2.0713	0.051	2539	51	0.1806	0.0018	2658	17
111	1.994	0.051	2620	55	0.1812	0.0023	2664	21
174	2.0178	0.0498	2595	53	0.1858	0.0021	2706	19
157	1.9216	0.0476	2701	54	0.1909	0.0042	2750	36
200	1.7683	0.0432	2889	57	0.198	0.0025	2810	21
40	1.7797	0.0437	2874	57	0.2011	0.0021	2835	17
124	1.9635	0.0491	2654	54	0.2027	0.0023	2848	18
92	1.8192	0.0451	2824	56	0.2051	0.0023	2867	18
57	1.795	0.0439	2855	56	0.2055	0.0025	2871	20
107	1.7455	0.0427	2920	57	0.2063	0.0023	2877	18
53	1.8386	0.0447	2800	55	0.2075	0.0021	2886	16
89	1.8288	0.0561	2812	70	0.2124	0.0056	2924	43
171	1.6844	0.0412	3004	58	0.2149	0.0028	2943	21
202	1.9482	0.0653	2671	73	0.2199	0.0096	2980	70
1	1.7857	0.0437	2867	56	0.2218	0.0027	2993	20
214	1.6287	0.0588	3086	88	0.2325	0.0064	3069	44
54	1.786	0.0455	2866	59	0.2396	0.0025	3117	17
173	1.6633	0.0415	3035	60	0.2468	0.0031	3164	20
175	1.5788	0.0385	3163	61	0.2514	0.003	3194	19
93	1.5279	0.0377	3246	63	0.2647	0.0037	3275	22
212	1.4079	0.0355	3460	67	0.2664	0.0029	3285	17
167	1.4051	0.0346	3465	66	0.2705	0.0029	3309	17
109	1.5239	0.0372	3252	62	0.2707	0.0029	3310	17
25	1.4622	0.0357	3359	64	0.2966	0.0033	3452	17
208	1.3432	0.0327	3587	67	0.3194	0.0036	3567	17

## Sheet: SW DZ
Mako et al., 2015
Mako, C.A., Williams, M.L., Karlstrom, K.E., Doe, M.F., Powicki, D., Holland, M.E., Gehrels, G., and Pecha, M., 2015, Polyphase Proterozoic deformation in the Four Peaks area, central Arizona, and relevance for the Mazatzal orogeny: Geosphere, v. 11, doi:10.1130/GES01196.1.
Supplemental Table 1.
							Isotope ratios						Apparent ages (Ma)
Analysis	U	206Pb	U/Th	206Pb*	±	207Pb*	±	206Pb*	±	error	206Pb*	±	207Pb*	±	206Pb*	±	Best age	±	Conc
	(ppm)	204Pb		207Pb*	(%)	235U*	(%)	238U	(%)	corr.	238U*	(Ma)	235U	(Ma)	207Pb*	(Ma)	(Ma)	(Ma)	(%)
Four Peaks Upper Pelite			Standard Error = 0.8																		Age (Ma)	±1sig
Spot 40	160.293	NA()	0.896555	10.3865	0.470692	3.52001	1.7746	0.265282	1.71104	0.964183	1516.81	17.2036	1531.72	10.7315	1553.19	8.83732	1553.19	8.83732	97.6575		1553.19	8.83732
Spot 157	84.9784	NA()	1.2334	10.3462	0.541616	3.57369	2.00971	0.268282	1.93535	0.963001	1532.08	19.5243	1543.71	12.1457	1560.5	10.1592	1560.5	10.1592	98.1788		1560.5	10.1592
Spot 88	53.5963	NA()	1.00074	10.3384	0.549208	3.78182	2.02787	0.283693	1.95209	0.962627	1609.93	19.7565	1588.89	11.9784	1561.91	10.2997	1561.91	10.2997	103.075		1561.91	10.2997
Spot 21	90.2465	NA()	1.14102	10.3026	0.578618	3.63577	1.99544	0.271792	1.9097	0.957036	1549.89	19.3742	1557.4	12.1107	1568.42	10.8404	1568.42	10.8404	98.8188		1568.42	10.8404
Spot 125	54.8509	NA()	0.944272	10.2851	0.601505	3.83234	2.01353	0.286001	1.92159	0.954337	1621.51	19.2585	1599.56	11.8527	1571.6	11.2646	1571.6	11.2646	103.176		1571.6	11.2646
Spot 34	107.582	NA()	0.823922	10.2636	0.501899	3.44178	1.86454	0.256316	1.79572	0.963089	1470.97	16.9376	1513.99	10.8751	1575.52	9.39411	1575.52	9.39411	93.3637		1575.52	9.39411
Spot 151	86.4215	NA()	0.675428	10.2588	0.530149	3.68511	1.91261	0.27431	1.83766	0.960816	1562.64	17.8606	1568.15	11.1178	1576.39	9.92185	1576.39	9.92185	99.128		1576.39	9.92185
Spot 98	119.195	NA()	1.35099	10.2164	0.543027	3.64871	1.9074	0.270479	1.82847	0.958618	1543.23	18.6165	1560.23	11.6452	1584.13	10.1543	1584.13	10.1543	97.4183		1584.13	10.1543
Spot 20	105.465	NA()	0.64004	10.2094	0.538794	3.82202	1.90686	0.283132	1.82916	0.959251	1607.12	18.7996	1597.39	11.4871	1585.41	10.0734	1585.41	10.0734	101.369		1585.41	10.0734
Spot 73	78.5643	NA()	0.929632	10.2027	0.576149	3.43659	2.12119	0.254412	2.04145	0.962406	1461.19	20.3041	1512.81	13.0287	1586.64	10.7701	1586.64	10.7701	92.093		1586.64	10.7701
Spot 76	28.2515	NA()	0.763944	10.1947	0.655288	3.63588	3.4378	0.268954	3.37477	0.981665	1535.49	21.1188	1557.42	13.3703	1588.11	12.2471	1588.11	12.2471	96.6868		1588.11	12.2471
Spot 158	81.7289	NA()	1.14463	10.1893	0.548607	3.62235	2.09667	0.267811	2.02362	0.965161	1529.68	20.9495	1554.45	12.9973	1589.1	10.2519	1589.1	10.2519	96.261		1589.1	10.2519
Spot 132	173.104	NA()	0.992823	9.56912	0.487077	4.28276	1.69385	0.297365	1.6223	0.957764	1678.23	17.7059	1690.05	10.6484	1705.56	8.9655	1705.56	8.9655	98.3972		1705.56	8.9655
Spot 87	300.093	NA()	5.37177	9.52582	0.448209	4.04294	1.75559	0.279444	1.69742	0.966861	1588.56	20.522	1642.88	12.414	1713.91	8.24301	1713.91	8.24301	92.6863		1713.91	8.24301
Spot 13	288.074	NA()	2.23718	9.50865	0.44658	4.51702	1.42183	0.311649	1.34987	0.949393	1748.82	16.0058	1734.11	9.44766	1717.23	8.20962	1717.23	8.20962	101.84		1717.23	8.20962
Spot 53	375.565	NA()	2.46609	9.50329	0.392148	4.43378	1.58082	0.305733	1.53141	0.968743	1719.68	20.2606	1718.67	11.5865	1718.26	7.20801	1718.26	7.20801	100.082		1718.26	7.20801
Spot 101	231.276	NA()	2.06577	9.47858	0.489583	4.39507	1.61594	0.302275	1.53999	0.953	1702.58	17.9206	1711.41	10.7029	1723.05	8.99355	1723.05	8.99355	98.8122		1723.05	8.99355
Spot 55	218.115	NA()	1.54914	9.47358	0.412068	4.31745	1.57474	0.296781	1.51987	0.965156	1675.33	17.0381	1696.7	10.1094	1724.02	7.56868	1724.02	7.56868	97.1758		1724.02	7.56868
Spot 45	280.049	NA()	2.64706	9.46779	0.433985	4.50176	1.58973	0.309261	1.52935	0.962016	1737.07	19.2403	1731.3	11.1003	1725.14	7.97012	1725.14	7.97012	100.692		1725.14	7.97012
Spot 47	79.0059	NA()	1.77034	9.44152	0.553276	4.31065	1.93573	0.29531	1.85497	0.958282	1668.01	19.4881	1695.4	11.8424	1730.24	10.1544	1730.24	10.1544	96.4036		1730.24	10.1544
Spot 115	291.409	NA()	3.73067	9.41832	0.438699	4.7568	1.48461	0.325074	1.41831	0.955343	1814.46	18.082	1777.31	10.2751	1734.75	8.04519	1734.75	8.04519	104.595		1734.75	8.04519
Spot 67	274.253	NA()	2.26392	9.41582	0.415189	4.61916	1.56339	0.315584	1.50725	0.964092	1768.13	19.0913	1752.74	10.8724	1735.24	7.61347	1735.24	7.61347	101.895		1735.24	7.61347
Spot 81	257.438	NA()	1.84814	9.40703	0.440884	4.68101	1.51146	0.319511	1.44573	0.956512	1787.34	17.6154	1763.85	10.1369	1736.95	8.08305	1736.95	8.08305	102.901		1736.95	8.08305
Spot 152	107.908	NA()	1.80221	9.40412	0.483634	4.30392	1.83769	0.293682	1.7729	0.964748	1659.9	18.672	1694.11	11.2432	1737.52	8.86638	1737.52	8.86638	95.5328		1737.52	8.86638
Spot 161	124.068	NA()	3.08896	9.35873	0.488567	4.56484	1.83535	0.309982	1.76913	0.963918	1740.62	19.9744	1742.87	11.6415	1746.38	8.94696	1746.38	8.94696	99.6697		1746.38	8.94696
Spot 16	146.041	NA()	2.61296	9.34457	0.48831	4.3467	1.85198	0.294722	1.78644	0.964613	1665.09	20.2841	1702.27	12.1021	1749.16	8.93919	1749.16	8.93919	95.1936		1749.16	8.93919
Spot 103	72.8724	NA()	2.06435	9.33945	0.502259	4.4879	1.93094	0.304129	1.86447	0.965579	1711.75	19.9567	1728.74	11.7861	1750.16	9.19344	1750.16	9.19344	97.8054		1750.16	9.19344
Spot 31	319.961	NA()	2.71574	9.33804	0.456522	4.18454	1.68147	0.283529	1.61831	0.962438	1609.11	19.7399	1671	11.9614	1750.44	8.3576	1750.44	8.3576	91.9262		1750.44	8.3576
Spot 109	260.55	NA()	2.72656	9.32399	0.444859	4.54006	1.57577	0.307155	1.51167	0.959322	1726.69	18.568	1738.34	10.8512	1753.19	8.14128	1753.19	8.14128	98.4882		1753.19	8.14128
Spot 130	123.421	NA()	3.29304	9.28676	0.481991	4.40333	1.83921	0.296715	1.77493	0.96505	1675	19.4731	1712.97	11.6295	1760.51	8.81278	1760.51	8.81278	95.1427		1760.51	8.81278
Spot 137	179.656	NA()	2.38169	9.26831	0.480958	4.43922	1.76716	0.298539	1.70045	0.962251	1684.06	19.6944	1719.69	11.7119	1764.15	8.78991	1764.15	8.78991	95.4604		1764.15	8.78991
Spot 153	210.711	NA()	2.13653	9.26602	0.494467	4.84302	1.61723	0.325614	1.53979	0.952112	1817.09	18.6141	1792.4	10.7334	1764.6	9.03629	1764.6	9.03629	102.975		1764.6	9.03629
Spot 89	278.531	NA()	6.11241	9.25792	0.414117	4.60276	1.67963	0.30919	1.62778	0.96913	1736.72	20.718	1749.77	11.8659	1766.2	7.56638	1766.2	7.56638	98.331		1766.2	7.56638
Spot 56	117.248	NA()	1.50835	9.253	0.532367	4.52397	1.85951	0.303736	1.78168	0.958142	1709.81	19.7991	1735.39	11.8234	1767.17	9.72579	1767.17	9.72579	96.7542		1767.17	9.72579
Spot 25	121.56	NA()	2.86899	9.24162	0.524893	4.50068	1.8691	0.301801	1.79389	0.959759	1700.23	20.0273	1731.1	11.9573	1769.42	9.58658	1769.42	9.58658	96.0902		1769.42	9.58658
Spot 83	165.977	NA()	1.88487	9.23398	0.475344	4.64426	1.72051	0.311171	1.65355	0.961077	1746.47	19.0744	1757.26	11.1485	1770.93	8.67998	1770.93	8.67998	98.619		1770.93	8.67998
Spot 33	213.702	NA()	3.38479	9.23334	0.447809	4.54654	1.65855	0.304603	1.59695	0.96286	1714.09	18.9772	1739.53	11.1368	1771.05	8.17704	1771.05	8.17704	96.784		1771.05	8.17704
Spot 111	174.672	NA()	2.99714	9.21734	0.471505	4.57356	1.81113	0.305882	1.74867	0.965518	1720.41	20.9548	1744.46	12.2126	1774.22	8.60456	1774.22	8.60456	96.9673		1774.22	8.60456
Spot 12	216.545	NA()	0.760941	9.21623	0.486722	4.39358	1.7229	0.29381	1.65272	0.959267	1660.54	19.3238	1711.13	11.6372	1774.44	8.88208	1774.44	8.88208	93.5811		1774.44	8.88208
Spot 63	215.177	NA()	2.87779	9.19385	0.440145	3.93054	2.06301	0.262207	2.01551	0.976976	1501.12	23.2418	1619.99	14.494	1778.87	8.02754	1778.87	8.02754	84.3861		1778.87	8.02754
Spot 60	128.079	NA()	3.82236	9.19003	0.49282	4.56182	1.84035	0.304193	1.77314	0.963479	1712.07	20.1027	1742.32	11.8676	1779.63	8.98764	1779.63	8.98764	96.2033		1779.63	8.98764
Spot 131	100.301	NA()	2.62998	9.18408	0.564959	4.7766	2.01377	0.318309	1.9329	0.95984	1781.46	23.0714	1780.79	13.3192	1780.81	10.302	1780.81	10.302	100.037		1780.81	10.302
Spot 116	78.7618	NA()	0.996461	9.18183	0.579704	4.69242	2.03513	0.312623	1.95082	0.958573	1753.6	22.4431	1765.89	13.163	1781.26	10.5704	1781.26	10.5704	98.4473		1781.26	10.5704
Spot 124	241.712	NA()	2.89684	9.18107	0.460799	4.73248	1.577	0.315265	1.50817	0.956357	1766.57	18.2601	1773.01	10.6328	1781.41	8.40171	1781.41	8.40171	99.1668		1781.41	8.40171
Spot 97	211.792	NA()	1.7424	9.17806	0.487351	4.73607	1.68949	0.315401	1.61768	0.957492	1767.23	19.9078	1773.65	11.5454	1782.01	8.88528	1782.01	8.88528	99.1708		1782.01	8.88528
Spot 28	249.698	NA()	2.12801	9.17562	0.419116	4.62232	1.59612	0.307744	1.54011	0.964909	1729.59	18.869	1753.31	10.9574	1782.49	7.64051	1782.49	7.64051	97.0324		1782.49	7.64051
Spot 108	118.341	NA()	1.06506	9.16745	0.551174	4.97816	1.9245	0.33114	1.84388	0.95811	1843.9	22.7332	1815.62	12.8611	1784.12	10.0465	1784.12	10.0465	103.351		1784.12	10.0465
Spot 95	305.629	NA()	3.19333	9.16168	0.440913	4.78125	1.48697	0.317841	1.4201	0.955028	1779.18	18.0181	1781.61	10.4127	1785.26	8.03524	1785.26	8.03524	99.6591		1785.26	8.03524
Spot 39	199.292	NA()	2.67233	9.15383	0.439777	4.69934	1.54677	0.312129	1.48293	0.958729	1751.17	16.7288	1767.12	9.84791	1786.83	8.01299	1786.83	8.01299	98.0046		1786.83	8.01299
Spot 46	242.796	NA()	4.50795	9.15004	0.470667	4.50687	1.59136	0.299221	1.52017	0.955261	1687.44	17.9683	1732.24	10.7914	1787.58	8.57517	1787.58	8.57517	94.3982		1787.58	8.57517
Spot 84	151.254	NA()	1.26431	9.14708	0.488303	4.92115	1.71332	0.32662	1.64226	0.958526	1821.98	19.2143	1805.89	11.0166	1788.17	8.8959	1788.17	8.8959	101.891		1788.17	8.8959
Spot 119	308.352	NA()	2.94889	9.14392	0.482135	4.58348	1.70821	0.304104	1.63875	0.959342	1711.63	21.2085	1746.27	12.4281	1788.8	8.78465	1788.8	8.78465	95.6859		1788.8	8.78465
Spot 112	145.048	NA()	2.20701	9.14212	0.492242	4.63107	1.80204	0.307201	1.73351	0.961969	1726.92	19.6539	1754.89	11.5876	1789.16	8.96842	1789.16	8.96842	96.5213		1789.16	8.96842
Spot 22	113.114	NA()	1.75708	9.13961	0.498202	4.79585	1.77358	0.318044	1.70217	0.959736	1780.17	18.7933	1784.17	10.9805	1789.66	9.07645	1789.66	9.07645	99.4698		1789.66	9.07645
Spot 159	97.8979	NA()	3.56029	9.13814	0.539633	4.83209	1.82195	0.320396	1.7402	0.955131	1791.66	19.0559	1790.5	11.2096	1789.95	9.8309	1789.95	9.8309	100.096		1789.95	9.8309
Spot 61	274.686	NA()	2.79045	9.12456	0.417887	4.37696	1.59694	0.289787	1.54129	0.965155	1640.46	18.2189	1708	10.9561	1792.66	7.6104	1792.66	7.6104	91.51		1792.66	7.6104
Spot 139	112.77	NA()	2.58049	9.1222	0.502307	4.67345	1.90412	0.309337	1.83667	0.964577	1737.44	21.0848	1762.5	12.3188	1793.13	9.14729	1793.13	9.14729	96.8943		1793.13	9.14729
Spot 77	123.697	NA()	1.5767	9.10678	0.5327	4.85128	1.86468	0.320565	1.78697	0.958325	1792.49	21.0851	1793.84	12.1981	1796.21	9.69709	1796.21	9.69709	99.7926		1796.21	9.69709
Spot 110	229.117	NA()	1.92665	9.09914	0.486089	3.9829	1.8471	0.262962	1.78199	0.964751	1504.98	19.65	1630.72	12.5204	1797.74	8.84692	1797.74	8.84692	83.7151		1797.74	8.84692
Spot 160	189.188	NA()	3.20922	9.09127	0.493128	4.88693	1.73383	0.32237	1.66223	0.958701	1801.29	20.5162	1800	11.7635	1799.31	8.97329	1799.31	8.97329	100.11		1799.31	8.97329
Spot 102	335.824	NA()	8.21456	9.03172	0.487091	4.28549	1.83114	0.280844	1.76517	0.963972	1595.61	21.7064	1690.58	13.2643	1811.26	8.84857	1811.26	8.84857	88.0938		1811.26	8.84857
Spot 19	239.793	NA()	2.42245	8.98332	0.50217	4.17234	1.9332	0.271963	1.86684	0.965673	1550.76	22.0021	1668.6	13.7072	1821.02	9.11173	1821.02	9.11173	85.159		1821.02	9.11173
Spot 122	313.81	NA()	2.19098	8.96625	0.456683	5.26674	1.58649	0.342647	1.51934	0.957673	1899.39	21.6267	1863.49	11.8762	1824.47	8.28274	1824.47	8.28274	104.106		1824.47	8.28274
Spot 118	266.305	NA()	3.76728	8.9416	0.427618	5.26172	1.52219	0.341379	1.46089	0.95973	1893.3	19.3429	1862.67	10.7012	1829.46	7.75261	1829.46	7.75261	103.489		1829.46	7.75261
Spot 54	347.353	40449.1	1.62139	8.933	0.480956	4.25563	1.89705	0.275839	1.83507	0.967328	1570.37	23.0027	1684.83	14.1239	1831.2	8.63046	1831.2	8.63046	85.7562		1831.2	8.63046
Spot 38	320.104	NA()	3.93416	8.92766	0.479971	4.84293	1.86641	0.313718	1.80364	0.966368	1758.98	24.5342	1792.39	14.0088	1832.29	8.69876	1832.29	8.69876	95.9989		1832.29	8.69876
Spot 24	129.49	NA()	3.44521	8.89559	0.490519	4.97699	1.77161	0.321244	1.70235	0.960905	1795.8	19.6248	1815.42	11.3703	1838.81	8.88284	1838.81	8.88284	97.6611		1838.81	8.88284
Spot 144	312.46	NA()	2.40231	8.89445	0.387172	5.13318	1.44484	0.331284	1.392	0.963427	1844.6	18.5409	1841.61	10.3591	1839.04	7.01111	1839.04	7.01111	100.302		1839.04	7.01111
Spot 91	275.132	NA()	3.7351	8.84297	0.468535	4.91956	1.73568	0.315659	1.67124	0.962876	1768.5	22.0663	1805.62	12.6726	1849.55	8.47179	1849.55	8.47179	95.6178		1849.55	8.47179
Spot 26	101.061	NA()	2.2029	8.69348	0.550182	5.06434	1.97238	0.319456	1.8941	0.960308	1787.07	22.5811	1830.15	13.126	1880.32	9.91346	1880.32	9.91346	95.0407		1880.32	9.91346
Spot 105	209.821	NA()	1.09481	8.64156	0.488229	5.03211	1.74342	0.315527	1.67366	0.959988	1767.85	20.9281	1824.74	12.1889	1891.1	8.7839	1891.1	8.7839	93.4824		1891.1	8.7839
Spot 126	200.49	87994	1.0098	8.45173	0.591504	5.38423	1.83661	0.330189	1.73875	0.946718	1839.3	22.395	1882.35	13.0094	1930.97	10.5787	1930.97	10.5787	95.2524		1930.97	10.5787
Spot 52	312.132	22785	12.3256	8.22574	0.522769	5.45973	1.7888	0.325867	1.71071	0.956343	1818.32	23.8925	1894.29	13.6951	1979.37	9.29133	1979.37	9.29133	91.8633		1979.37	9.29133
Spot 75	163.977	NA()	1.84553	7.79104	0.514769	6.69618	1.65514	0.378544	1.57306	0.950406	2069.48	21.3451	2072.12	11.5834	2075.51	9.06443	2075.51	9.06443	99.7093		2075.51	9.06443
Spot 42	158.529	NA()	1.58393	7.75308	0.481697	6.70713	1.66828	0.377316	1.59722	0.957408	2063.73	21.6002	2073.56	11.6164	2084.11	8.4759	2084.11	8.4759	99.0221		2084.11	8.4759
Spot 133	66.5586	NA()	1.17416	7.69264	0.550901	6.9949	1.88696	0.390437	1.80475	0.956433	2124.86	22.9241	2110.78	12.2695	2097.87	9.67847	2097.87	9.67847	101.286		2097.87	9.67847
Spot 150	180.034	NA()	2.35123	6.62119	0.506756	9.40388	1.56457	0.451791	1.48023	0.946093	2403.21	23.4711	2378.21	11.7024	2357.61	8.65606	2357.61	8.65606	101.934		2357.61	8.65606
Spot 62	104.639	NA()	2.08255	6.43229	0.551714	9.48865	1.74558	0.442857	1.6561	0.948738	2363.42	24.0184	2386.45	12.2488	2406.92	9.37606	2406.92	9.37606	98.1927		2406.92	9.37606
Spot 49	144.217	NA()	1.75923	6.24757	0.541654	10.0407	1.64644	0.455165	1.55479	0.944335	2418.17	24.3148	2438.53	12.2074	2456.3	9.15889	2456.3	9.15889	98.4476		2456.3	9.15889
Spot 143	66.6339	NA()	1.52021	6.24033	0.62267	10.4668	1.87649	0.473932	1.77017	0.94334	2500.78	26.1737	2476.98	13.0496	2458.27	10.5239	2458.27	10.5239	101.729		2458.27	10.5239
Spot 136	103.841	NA()	1.87441	6.19109	0.578835	10.2764	1.73694	0.461637	1.63765	0.942838	2446.78	24.434	2459.98	12.3297	2471.64	9.76983	2471.64	9.76983	98.9941		2471.64	9.76983
Spot 138	53.3212	NA()	1.64828	6.11516	0.618941	10.2047	2.03537	0.452794	1.93898	0.952642	2407.66	29.0597	2453.5	14.5495	2492.46	10.4279	2492.46	10.4279	96.598		2492.46	10.4279
Spot 35	267.319	NA()	1.04287	5.8596	0.506481	9.35075	1.9427	0.397565	1.87552	0.965417	2157.82	31.8622	2373.01	16.6024	2564.11	8.47318	2564.11	8.47318	84.1546		2564.11	8.47318
Spot 117	136.355	NA()	1.54541	5.79876	0.564178	11.8696	1.79394	0.499421	1.70292	0.949261	2611.31	29.9842	2594.17	14.1055	2581.56	9.42219	2581.56	9.42219	101.152		2581.56	9.42219
Spot 90	166.916	NA()	1.44714	5.60612	0.579454	12.6713	1.79818	0.515441	1.70226	0.946657	2679.82	32.0778	2655.53	14.8101	2637.82	9.62188	2637.82	9.62188	101.592		2637.82	9.62188
Spot 147	82.71	NA()	0.872792	5.49951	0.613933	13.0402	1.82259	0.520358	1.71607	0.941559	2700.7	27.9931	2682.56	13.293	2669.66	10.1671	2669.66	10.1671	101.163		2669.66	10.1671
Spot 145	108.135	NA()	1.21879	5.4246	0.555535	12.1347	1.79121	0.47763	1.70288	0.950689	2516.94	27.584	2614.88	13.4679	2692.34	9.17717	2692.34	9.17717	93.485		2692.34	9.17717
Spot 74	220.246	NA()	1.64159	5.41778	0.479437	12.263	1.6459	0.482071	1.57453	0.956634	2536.28	28.9155	2624.74	13.7075	2694.42	7.91812	2694.42	7.91812	94.1308		2694.42	7.91812
Spot 48	91.0268	NA()	1.51728	5.39018	0.596568	13.0792	1.78847	0.511538	1.68604	0.942727	2663.19	27.7126	2685.38	13.2384	2702.85	9.84891	2702.85	9.84891	98.5326		2702.85	9.84891
Spot 140	45.395	NA()	1.88901	5.30567	0.6145	13.1707	1.94052	0.507042	1.84066	0.948537	2643.99	28.1882	2691.96	13.5679	2728.91	10.1167	2728.91	10.1167	96.888		2728.91	10.1167
Spot 94	273.084	NA()	2.66629	5.16074	0.513423	13.8066	1.45878	0.517004	1.36545	0.936018	2686.46	26.9268	2736.53	12.582	2774.42	8.42007	2774.42	8.42007	96.8296		2774.42	8.42007
Spot 32	203.203	NA()	4.08139	4.73601	0.559879	14.3162	1.80045	0.491965	1.71118	0.950421	2579.17	32.1924	2770.89	15.3254	2914.37	9.06798	2914.37	9.06798	88.4986		2914.37	9.06798
Spot 15	89.8874	NA()	1.26889	4.63528	0.643462	17.1477	1.70582	0.576734	1.5798	0.926126	2935.41	27.1624	2943.13	12.6601	2949.13	10.3907	2949.13	10.3907	99.535		2949.13	10.3907
Spot 146	112.232	NA()	1.81642	3.74615	0.605255	23.0143	1.64412	0.625571	1.52866	0.929773	3132.05	29.8189	3227.55	13.0964	3288.13	9.50671	3288.13	9.50671	95.2531		3288.13	9.50671
NOTES																					1650.98	20.9305
1. Analyses with >10% uncertainty (1-sigma) in 206Pb/238U age are not included.																					1708.51	15.927
2. Analyses with >10% uncertainty (1-sigma) in 206Pb/207Pb age are not included, unless 206Pb/238U age is <500 Ma.																					1704.11	16.1682
3. Best age is determined from 206Pb/238U age for analyses with 206Pb/238U age <1000 Ma and from 206Pb/207Pb age for analyses with 206Pb/238Uage > 1000 Ma.																					1704.52	11.4478
4. Concordance is based on 206Pb/238U age / 206Pb/207Pb age. Value is not reported for 206Pb/238U ages <500 Ma because of large uncertainty in 206Pb/207Pb age.																					1713.43	15.2645
5. Analyses with 206Pb/238U age > 500 Ma and with >20% discordance (<80% concordance) are not included.																					1675.11	25.1588
6. Analyses with 206Pb/238U age > 500 Ma and with >5% reverse discordance (<105% concordance) are not included.																					1662.82	26.6359
7. All uncertainties are reported at the 1-sigma level, and include only measurement errors.																					3529.77	3.62708
8. Systematic errors are as follows (at 2-sigma level): [0.9% (206Pb/238U) & 0.8% (206Pb/207Pb)]																					1738.08	18.3174
9. Analyses conducted by LA-MC-ICPMS, as described by Gehrels et al. (2008).																					1705.04	11.7185
10. U concentration and U/Th are calibrated relative to Sri Lanka zircon standard and are accurate to ~20%.																					1720.36	6.78538
11. Common Pb correction is from measured 204Pb with common Pb composition interpreted from Stacey and Kramers (1975).																					1700.38	8.43446
12. Common Pb composition assigned uncertainties of 1.5 for 206Pb/204Pb, 0.3 for 207Pb/204Pb, and 2.0 for 208Pb/204Pb.																					1779.92	14.7617
13. U/Pb and 206Pb/207Pb fractionation is calibrated relative to fragments of a large Sri Lanka zircon of 563.5 ± 3.2 Ma (2-sigma).																					1693.11	9.03553
14. U decay constants and composition as follows: 235U = 9.8485 x 10-10, 238U = 1.55125 x 10-10, 238U/235U = 137.88.																					1704.63	22.2406
15. Weighted mean and concordia plots determined with Isoplot (Ludwig, 2008).																					1696.23	21.694
																					1685.12	8.45837
Daniel et al., 2013																					1859.63	12.1628
TABLE DR1. DETRITAL ZIRCON U-Pb GEOCHRONOLOGIC DATA																					1730.08	6.14244
																					1686.9	8.15028
Arizona Laserchron Center analyses																					1706.1	18.4184
						Isotope ratios					Apparent ages (Ma)										1780.92	17.0781
																					1691.82	14.4758
Analysis	U	206 Pb	U/Th	206Pb*	±	207Pb*	±	206Pb*	±	error	206Pb*	±1s	207Pb*	±1s	207Pb*	±1s	Conc				1862.92	10.752
	(ppm)	204 Pb		207Pb*	(%)	235U	(%)	238U	(%)	corr.	238U	(Ma)	235U	(Ma)	206Pb*	(Ma)	(%)				1694.15	17.1501
																					1470.13	9.93821
Sample LP11-3: Middle Marquenas Formation quartzite, Picuris Mountains, New Mexico (N 36° 12.394', W 105° 48.344')																					1721.7	7.39537
LP113-1	77.3552	3043.76	2.78978	9.85613	1.12909	3.53651	2.02472	0.252802	1.68067	0.830074	1452.91	21.8625	1535.42	16.0282	1650.98	20.9305	88.003				1720.83	6.49599
LP113-2	364.69	30821.4	1.16618	9.55382	0.865517	4.38242	1.87909	0.303662	1.66789	0.887606	1709.44	25.0446	1709.03	15.5363	1708.51	15.927	100.055				1698.2	9.30041
LP113-3	80.7024	51570.3	3.3242	9.57669	0.878136	4.26218	1.04863	0.296037	0.57315	0.54657	1671.63	8.43947	1686.09	8.62439	1704.11	16.1682	98.094				2584.43	8.40891
LP113-4	265.268	162807	2.53652	9.57454	0.621824	4.20812	1.16029	0.292217	0.979594	0.844268	1652.6	14.2802	1675.61	9.51954	1704.52	11.4478	96.9536				1693.72	12.5565
LP113-5	103.503	137830	1.89421	9.52828	0.830035	4.37893	1.19098	0.302608	0.854095	0.717136	1704.23	12.7906	1708.37	9.84511	1713.43	15.2645	99.4628				1768.62	19.9261
LP113-6	65.8711	35709.1	2.07562	9.72844	1.36134	4.30717	1.85205	0.303902	1.25573	0.678021	1710.63	18.8671	1694.73	15.2632	1675.11	25.1588	102.121				1702.77	30.4182
LP113-7	90.0001	73588.8	1.72426	9.79334	1.43899	4.21906	2.27613	0.299671	1.76354	0.774797	1689.68	26.213	1677.74	18.6853	1662.82	26.6359	101.615				1701.48	13.0639
LP113-8	228.441	646953	2.22547	3.20732	0.235498	31.2903	0.936938	0.727865	0.906859	0.967897	3525.46	24.6264	3528.22	9.21913	3529.77	3.62708	99.8778				1738.19	10.9615
LP113-9	104.682	60070.2	2.15006	9.40125	0.999102	4.67445	1.43269	0.318724	1.02683	0.716718	1783.5	15.9985	1762.68	11.9842	1738.08	18.3174	102.613				1730.31	30.3456
LP113-11	178.548	82157.4	2.37001	9.57187	0.63657	4.33754	1.0982	0.301119	0.894889	0.814867	1696.86	13.3509	1700.53	9.06204	1705.04	11.7185	99.5203				1661.08	20.267
LP113-12	374.613	436408	2.73993	9.49245	0.369253	4.49685	1.09686	0.309589	1.03284	0.941632	1738.69	15.74	1730.39	9.11147	1720.36	6.78538	101.065				1690.08	39.2186
LP113-13	161.734	151511	3.79106	9.59609	0.457934	4.46164	0.911983	0.310519	0.788676	0.864792	1743.26	12.0465	1723.87	7.56478	1700.38	8.43446	102.521				1911.01	3.79138
LP113-14	146.012	279801	3.2398	9.18856	0.809385	4.83818	1.23233	0.322425	0.929263	0.754071	1801.56	14.6055	1791.56	10.3699	1779.92	14.7617	101.216				1745.07	6.8693
LP113-15	327.446	47387	3.25638	9.63405	0.490017	4.27312	1.51816	0.298575	1.43691	0.946478	1684.24	21.2978	1688.2	12.4925	1693.11	9.03553	99.4761				1783.6	7.01555
LP113-16	248.668	27103.7	3.77365	9.57397	1.20797	4.32777	1.74077	0.300508	1.25344	0.720046	1693.83	18.6709	1698.67	14.3588	1704.63	22.2406	99.3661				1720.38	9.75166
LP113-17	82.4548	42591.8	3.08182	9.61776	1.17703	4.29532	1.61875	0.299618	1.11128	0.686505	1689.42	16.5156	1692.46	13.3333	1696.23	21.694	99.5984				1775.51	5.14255
LP113-18	193.769	178089	2.34295	9.67586	0.458251	4.38873	1.23681	0.307983	1.14878	0.928828	1730.77	17.4374	1710.22	10.2282	1685.12	8.45837	102.709				2055.26	7.23127
LP113-19	329.191	10877.9	1.55688	8.79374	0.673434	5.20485	1.81643	0.331956	1.68698	0.928735	1847.86	27.1033	1853.41	15.4725	1859.63	12.1628	99.3668				1725.8	10.5882
LP113-20	175.171	179368	11.8118	9.44236	0.334674	4.67305	1.58061	0.320022	1.54477	0.977327	1789.84	24.1426	1762.43	13.221	1730.08	6.14244	103.454				1780.1	79.7856
LP113-21	163.557	151002	3.21408	9.66651	0.44166	4.2551	1.56038	0.298317	1.49657	0.959106	1682.96	22.1674	1684.72	12.8296	1686.9	8.15028	99.7662				1827.15	9.01987
LP113-22	95.3202	65885	1.70214	9.56633	1.00058	4.36431	2.34249	0.302803	2.11805	0.904184	1705.19	31.735	1705.61	19.3536	1706.1	18.4184	99.9468				1709.72	4.5833
LP113-24	111.308	70874.5	0.923391	9.18351	0.936487	4.72365	1.66596	0.314619	1.37783	0.827048	1763.4	21.2569	1771.44	13.9613	1780.92	17.0781	99.0157				1698.25	12.5699
LP113-25	141.329	118267	2.49567	9.64081	0.78501	4.33182	1.14262	0.302889	0.830267	0.726634	1705.62	12.4426	1699.44	9.42627	1691.82	14.4758	100.816				1692.83	6.48509
LP113-26	78.6024	91540.4	3.11905	8.77774	0.595569	5.21375	2.19619	0.331919	2.1139	0.962528	1847.67	33.9594	1854.87	18.7131	1862.92	10.752	99.1816				1694.73	12.78
LP113-27	121.819	84500.1	1.61415	9.62863	0.930285	4.23902	1.3516	0.296025	0.980508	0.725442	1671.57	14.4373	1681.61	11.1048	1694.15	17.1501	98.6673				1697.83	18.6943
LP113-28	393.131	233983	2.55918	10.8538	0.523516	3.2647	1.04353	0.256994	0.902712	0.865055	1474.44	11.8976	1472.68	8.11147	1470.13	9.93821	100.294				1717.08	6.11794
LP113-29	239.477	143581	5.60825	9.48554	0.402515	4.402	1.42098	0.302838	1.36278	0.959041	1705.37	20.4204	1712.72	11.758	1721.7	7.39537	99.0515				1794.41	7.94795
LP113-31	377.675	345828	2.73082	9.49003	0.353525	4.48471	0.874602	0.308674	0.799968	0.914665	1734.18	12.1635	1728.15	7.26154	1720.83	6.49599	100.776				1696.15	15.8875
LP113-34	163.452	42528	1.89337	9.60746	0.5048	4.3643	1.45642	0.304104	1.36614	0.938012	1711.63	20.5365	1705.61	12.0321	1698.2	9.30041	100.79				1695.5	5.2496
LP113-36	152.756	175264	1.73064	5.7888	0.503648	11.7676	1.29096	0.494053	1.18866	0.920758	2588.19	25.3388	2586.09	12.0821	2584.43	8.40891	100.145				1696.94	7.22113
LP113-37	151.904	87309.6	1.41453	9.63084	0.68111	4.3836	1.59423	0.306192	1.44141	0.90414	1721.94	21.7817	1709.25	13.1814	1693.72	12.5565	101.666				1744.7	43.5044
LP113-38	54.6997	23950.7	2.28267	9.24563	1.09097	4.8609	1.42847	0.325951	0.922117	0.645528	1818.73	14.6127	1795.51	12.0302	1768.62	19.9261	102.833				1697.74	14.5756
LP113-40	39.5039	23180.6	1.24446	9.58367	1.65165	4.51793	19.3185	0.314029	19.2478	0.996339	1760.5	296.736	1734.28	161.968	1702.77	30.4182	103.391				1719.11	13.9031
LP113-41	169.3	147803	1.46951	9.59039	0.70932	4.43278	1.20771	0.308326	0.977454	0.809348	1732.47	14.8494	1718.49	10.006	1701.48	13.0639	101.821				1710.63	5.38012
LP113-42	385.982	6315.83	2.16022	9.40067	0.59794	4.45095	2.18529	0.303466	2.10189	0.961838	1708.47	31.5459	1721.88	18.1203	1738.19	10.9615	98.2902				1693.39	8.93107
LP113-44	51.0288	161178	2.72195	9.44119	1.65351	4.64652	2.19896	0.318166	1.44959	0.659218	1780.76	22.5554	1757.67	18.3756	1730.31	30.3456	102.916				1715.39	12.1572
LP113-45	157.704	200397	2.51084	9.80254	1.09472	4.21756	1.67981	0.299846	1.27411	0.758484	1690.54	18.9466	1677.44	13.7883	1661.08	20.267	101.774				1917.66	6.47842
LP113-46	63.5649	78310.1	0.922431	9.64989	2.12604	4.36122	2.62594	0.305231	1.54127	0.58694	1717.2	23.2349	1705.02	21.6933	1690.08	39.2186	101.605				1696.42	19.9091
LP113-47	399.649	379923	3.37698	8.54639	0.211189	5.56027	1.78383	0.34465	1.77129	0.992967	1909	29.267	1909.97	15.3529	1911.01	3.79138	99.895				1465.26	21.2417
LP113-48	524.121	270342	1.82354	9.36547	0.375073	4.52332	1.87663	0.307246	1.83876	0.979823	1727.14	27.8596	1735.27	15.6063	1745.07	6.8693	98.9727				1731	12.5412
LP113-49	502.008	45427.8	2.7486	9.17004	0.384894	4.89301	2.35525	0.325422	2.32359	0.986557	1816.15	36.7769	1801.05	19.8592	1783.6	7.01555	101.825				1691.13	10.3507
LP113-50	226.219	194354	6.0076	9.49235	0.530673	4.71805	1.47313	0.324814	1.37423	0.932862	1813.2	21.72	1770.45	12.3426	1720.38	9.75166	105.395				1651.33	21.3893
LP113-51	360.766	436514	6.9064	9.21082	0.281884	4.82118	1.64238	0.32207	1.61801	0.985161	1799.83	25.4095	1788.6	13.8125	1775.51	5.14255	101.37				1719.29	17.8638
LP113-53	644.493	52447.3	7.22417	7.88106	0.409623	6.5009	1.53561	0.371584	1.47997	0.963766	2036.85	25.8468	2046.02	13.5144	2055.26	7.23127	99.1042				1746.49	8.81108
LP113-54	315.004	11589.6	4.47412	9.46437	0.576592	4.51045	1.16018	0.309607	1.00676	0.867759	1738.77	15.3431	1732.9	9.64275	1725.8	10.5882	100.752				1677.99	13.2685
LP113-56	136.793	28783.6	1.67201	9.18766	4.37263	4.41483	6.58906	0.294183	4.92908	0.74807	1662.4	72.2311	1715.13	54.601	1780.1	79.7856	93.3879				1459.05	23.8559
LP113-57	129.833	56645.9	2.58219	8.953	0.497376	5.16021	1.04072	0.33507	0.914178	0.878407	1862.91	14.7904	1846.08	8.85213	1827.15	9.01987	101.957				1652.84	22.6545
LP113-60	312.133	184009	8.08099	9.54752	0.249083	4.55317	1.05985	0.315285	1.03017	0.971991	1766.66	15.9188	1740.74	8.82389	1709.72	4.5833	103.33				1747.04	15.0536
LP113-61	94.0386	56306.5	1.56225	9.60723	0.682226	4.4274	1.65673	0.308494	1.50974	0.911278	1733.29	22.9455	1717.48	13.7235	1698.25	12.5699	102.064				1802.02	5.39092
LP113-62	277.792	276103	2.21672	9.63551	0.35169	4.28636	1.1428	0.299545	1.08734	0.951469	1689.05	16.1568	1690.75	9.40902	1692.83	6.48509	99.777				1697.3	14.7694
LP113-63	209.258	22590.1	0.965927	9.62556	0.693318	4.27417	1.33771	0.298385	1.14402	0.855206	1683.29	16.9482	1688.4	11.0079	1694.73	12.78	99.325				1710.06	18.7669
LP113-66	121.793	69088.7	2.24705	9.60942	1.01451	4.48195	1.9454	0.312365	1.65993	0.853258	1752.34	25.4694	1727.63	16.1513	1697.83	18.6943	103.211				2704.09	7.17693
LP113-68	413.493	53694.6	1.73594	9.50939	0.332794	4.56165	1.04308	0.314611	0.988563	0.947738	1763.36	15.2511	1742.29	8.68711	1717.08	6.11794	102.695				1703.42	9.18154
LP113-69	197.017	119799	2.25134	9.11582	0.436516	5.00822	1.31338	0.331114	1.23872	0.943153	1843.78	19.8635	1820.71	11.1167	1794.41	7.94795	102.751				1703.11	31.0136
LP113-70	147.409	83010.3	4.17765	9.61816	0.862027	4.45769	1.72804	0.310958	1.49768	0.86669	1745.42	22.9008	1723.13	14.3322	1696.15	15.8875	102.905				1685.61	11.1076
LP113-71	270.869	240169	1.98957	9.62155	0.284785	4.47055	1.37329	0.311964	1.34343	0.978261	1750.36	20.5929	1725.52	11.3956	1695.5	5.2496	103.236				1700.44	13.1457
LP113-72	287.921	250358	1.71667	9.61402	0.391904	4.44618	2.21342	0.310021	2.17844	0.9842	1740.81	33.2339	1720.99	18.35	1696.94	7.22113	102.585				1733.98	13.5182
LP113-73	242.966	16158.6	2.24096	9.36736	2.37464	4.57767	3.2321	0.311	2.19261	0.678386	1745.62	33.5306	1745.21	26.9407	1744.7	43.5044	100.053				1709.87	8.06617
LP113-74	130.054	42696.2	2.12847	9.6099	0.791017	4.45579	1.1701	0.310557	0.862226	0.73688	1743.45	13.1712	1722.78	9.70363	1697.74	14.5756	102.693				1727.79	5.10972
LP113-75	180.203	90435.4	2.64276	9.4989	0.756465	4.56622	1.40099	0.314579	1.17921	0.841698	1763.2	18.1909	1743.13	11.6703	1719.11	13.9031	102.564				1688.74	8.83168
LP113-76	255.136	241602	1.88905	9.54281	0.292421	4.50831	1.16515	0.312025	1.12786	0.967994	1750.66	17.2911	1732.51	9.68324	1710.63	5.38012	102.34				1766.03	15.7686
LP113-77	194.812	94041.1	1.27398	9.63257	0.48437	4.4381	1.22496	0.310054	1.12512	0.918501	1740.97	17.166	1719.48	10.1511	1693.39	8.93107	102.81				1678.3	6.25613
LP113-78	175.459	106055	3.28809	9.51818	0.66116	4.51763	3.01381	0.311862	2.94039	0.97564	1749.86	45.0615	1734.22	25.0606	1715.39	12.1572	102.01				1756.87	8.30386
LP113-79	227.559	188391	3.76113	8.51478	0.36115	5.72163	1.03733	0.353339	0.972436	0.937438	1950.52	16.3669	1934.64	8.96612	1917.66	6.47842	101.714				1474.99	10.4991
LP113-80	99.1208	58258.4	2.10684	9.61678	1.08023	4.48906	1.8591	0.313101	1.51306	0.813868	1755.95	23.2575	1728.95	15.4392	1696.42	19.9091	103.509				1725.87	7.85592
LP113-81	107.504	105271	1.81738	10.8816	1.11819	3.27786	1.45343	0.258691	0.92849	0.638828	1483.14	12.3015	1475.81	11.3085	1465.26	21.2417	101.22				1724.03	12.3693
LP113-82	183.529	92434.4	1.40822	9.43759	0.683484	4.48177	5.74317	0.306768	5.70235	0.992893	1724.78	86.2998	1727.6	47.7122	1731	12.5412	99.6406				1718.17	9.20932
LP113-83	170.049	245569	2.24436	9.64437	0.561199	4.36746	1.37189	0.305493	1.25186	0.912503	1718.49	18.8843	1706.2	11.3352	1691.13	10.3507	101.618				1803.75	13.2647
LP113-84	120.016	3262.95	1.52206	9.85422	1.1539	3.86959	3.41434	0.276558	3.21345	0.941162	1574.01	44.879	1607.36	27.556	1651.33	21.3893	95.3172				1780.99	6.93557
LP113-85	126.92	130382	3.26932	9.49797	0.972071	4.50303	1.5677	0.310195	1.22995	0.784554	1741.66	18.7717	1731.53	13.0263	1719.29	17.8638	101.301				1727.58	15.445
LP113-86	254.946	23410.4	4.18129	9.35817	0.481155	4.60056	1.3529	0.312248	1.26445	0.934621	1751.76	19.3957	1749.37	11.2848	1746.49	8.81108	100.302				1853.08	9.75304
LP113-87	195.577	102864	1.82793	9.71327	0.718195	4.28215	1.37333	0.301666	1.17057	0.852357	1699.56	17.4881	1689.94	11.3051	1677.99	13.2685	101.285				1747.46	17.335
LP113-88	129.609	7722.73	1.03049	10.9173	1.25475	3.39153	3.26432	0.268539	3.01353	0.923174	1533.38	41.1248	1502.44	25.6032	1459.05	23.8559	105.095				1993.63	5.16657
LP113-89	81.8038	47498.1	1.42562	9.84621	1.22237	4.22492	1.32431	0.301708	0.50951	0.384737	1699.77	7.6128	1678.87	10.8736	1652.84	22.6545	102.839				1636.81	12.4299
LP113-91	158.583	117699	1.68813	9.35539	0.822025	4.57037	1.34203	0.310107	1.06081	0.790451	1741.23	16.1868	1743.88	11.1809	1747.04	15.0536	99.6678				1877.62	20.2707
LP113-92	365.263	262080	4.32816	9.07777	0.296359	4.95741	1.11479	0.326387	1.07468	0.964017	1820.85	17.0475	1812.09	9.41963	1802.02	5.39092	101.045				1656.05	57.1937
LP113-93	154.607	44339.5	2.03997	9.61219	0.801486	4.45638	1.91712	0.310673	1.74154	0.908416	1744.02	26.6111	1722.89	15.8998	1697.3	14.7694	102.753				1901.81	11.6585
LP113-94	117.709	132825	2.6759	9.54577	1.02002	4.49001	1.5052	0.310854	1.10687	0.735368	1744.91	16.9207	1729.13	12.5003	1710.06	18.7669	102.038				1598.07	54.8548
LP113-95	131.614	124993	2.26964	5.38616	0.434774	13.7291	1.05733	0.536314	0.963799	0.911544	2768	21.6893	2731.2	10.0073	2704.09	7.17693	102.364				2070.86	10.8585
LP113-96	197.216	132374	4.33048	9.58027	0.498677	4.42497	3.88137	0.307459	3.8492	0.991712	1728.19	58.3525	1717.03	32.1568	1703.42	9.18154	101.454				1594.04	17.6417
LP113-97	67.2428	83920.9	2.12976	9.5819	1.68404	4.55376	2.40583	0.316461	1.71814	0.714158	1772.42	26.6251	1740.85	20.0324	1703.11	31.0136	104.07				1779.69	15.0476
LP113-98	134.945	109787	1.41182	9.67331	0.601814	4.32959	1.17679	0.303753	1.01126	0.859341	1709.89	15.1883	1699.01	9.70721	1685.61	11.1076	101.441				1868.25	81.2791
LP113-99	112.673	106193	1.80061	9.59578	0.713671	4.40244	4.48029	0.306389	4.42308	0.987232	1722.91	66.8742	1712.8	37.0879	1700.44	13.1457	101.321				1606.95	23.1955
LP113-100	164.455	44757.4	1.96506	9.42227	0.736991	4.51898	5.04359	0.308812	4.98945	0.989266	1734.86	75.8941	1734.47	41.9564	1733.98	13.5182	100.05				1616.6	13.6148
LP113-101	165.568	151755	2.60327	9.54678	0.438465	4.4367	0.989109	0.307196	0.886615	0.896377	1726.89	13.4316	1719.22	8.19612	1709.87	8.06617	100.996				1496.58	10.8478
LP113-102	317.914	178624	4.00304	9.45412	0.278326	4.4996	1.38661	0.308527	1.35839	0.979648	1733.46	20.6469	1730.9	11.5198	1727.79	5.10972	100.328				1613.6	16.0567
LP113-103	222.989	145773	1.39585	9.65688	0.478697	4.23269	1.20026	0.29645	1.10067	0.917026	1673.68	16.2246	1680.38	9.8585	1688.74	8.83168	99.1081				1788.19	12.3101
LP113-104	119.442	63804.1	3.44681	9.25875	0.8631	4.67182	1.27109	0.313716	0.933128	0.734116	1758.97	14.3647	1762.21	10.6313	1766.03	15.7686	99.6				1632.35	24.9776
LP113-105	179.454	112297	2.34577	9.71163	0.338647	4.28538	2.11397	0.301842	2.08667	0.987085	1700.44	31.1887	1690.56	17.4054	1678.3	6.25613	101.319				1783.03	24.7374
LP113-106	245.459	161490	3.75036	9.30527	0.453951	4.62405	1.60646	0.312069	1.54099	0.959244	1750.88	23.6273	1753.62	13.4122	1756.87	8.30386	99.6589				1610.61	23.7305
LP113-107	540.468	33375	1.57107	10.826	0.553422	3.19909	1.29109	0.251184	1.16646	0.903472	1444.58	15.096	1456.94	9.98784	1474.99	10.4991	97.9383				1738.99	9.65336
LP113-108	411.422	8034.16	2.34894	9.46401	0.427806	4.44149	1.45017	0.304862	1.38563	0.955496	1715.37	20.8692	1720.11	12.0193	1725.87	7.85592	99.3917				1699.84	5.40075
LP113-109	116.297	128426	2.04571	9.47349	0.673427	4.40615	1.81277	0.302738	1.68305	0.928437	1704.87	25.2131	1713.5	15.0029	1724.03	12.3693	98.8886				1875.31	157.225
LP113-110	236.417	68452.7	3.8391	9.50379	0.50102	4.53385	2.77941	0.312509	2.73388	0.983619	1753.04	41.9627	1737.2	23.1258	1718.17	9.20932	102.03				1513.08	12.8494
LP113-111	152.85	106356	2.49518	9.06914	0.72946	4.89564	1.45859	0.322014	1.26307	0.865959	1799.56	19.8329	1801.51	12.2988	1803.75	13.2647	99.7676				1614.91	16.2098
LP113-112	306.466	130825	3.97116	9.1832	0.380386	4.86227	2.00823	0.323841	1.97188	0.981897	1808.46	31.0955	1795.74	16.9144	1780.99	6.93557	101.543				1633.11	17.0924
																					1723.68	7.66544
Sample J10-PIC8: Piedra Lumbre Formation quartzite, Picuris Mountains, New Mexico (N 36° 16.335', W 105° 43.436')																					2683.1	4.88241
PIC8-1C	137.131	96667.6	2.52818	9.45519	0.841346	4.48065	1.22252	0.307263	0.886952	0.725513	1727.22	13.439	1727.39	10.1486	1727.58	15.445	99.979				1549.9	14.1644
PIC8-2C	188.524	293597	1.71008	8.82572	0.539608	5.21821	1.27861	0.334019	1.15917	0.906583	1857.83	18.71	1855.59	10.8953	1853.08	9.75304	100.257				1797.95	17.4713
PIC8-3C	94.2937	179509	2.12839	9.35323	0.946635	4.5554	1.39927	0.30902	1.03046	0.736424	1735.88	15.6815	1741.15	11.651	1747.46	17.335	99.3373				1638.49	27.1561
PIC8-5C	326.331	34265.2	3.43251	8.16008	0.290601	6.02969	1.11446	0.356852	1.0759	0.965405	1967.23	18.241	1980.14	9.70657	1993.63	5.16657	98.6758				1511.41	31.2737
PIC8-6C	282.753	126313	1.53896	9.93167	0.66927	4.17202	1.77449	0.300516	1.64344	0.926147	1693.86	24.4807	1668.54	14.5351	1636.81	12.4299	103.486				1732.46	6.99374
PIC8-7C	319.136	2346.96	1.82681	8.70652	1.1247	5.29152	4.49412	0.334137	4.35111	0.968179	1858.4	70.2521	1867.5	38.3978	1877.62	20.2707	98.9765				1810.09	18.6798
PIC8-8C	156.001	3045.8	0.993622	9.8292	3.08669	3.9917	4.16275	0.28456	2.79299	0.67095	1614.29	39.8854	1632.51	33.8127	1656.05	57.1937	97.4784				1619.75	11.6971
PIC8-9C	199.592	313462	0.662034	8.59026	0.648797	5.59566	1.43396	0.348623	1.2788	0.89179	1928.02	21.3102	1915.43	12.3533	1901.81	11.6585	101.378				1826.03	48.8613
PIC8-10C	130.304	5564.44	0.924961	10.1405	2.93841	3.71035	4.19456	0.272881	2.99334	0.713625	1555.41	41.3681	1573.6	33.5611	1598.07	54.8548	97.3302				1651.78	19.5372
PIC8-12C	137.617	46628.9	2.23396	7.81167	0.616305	6.71157	1.02161	0.380248	0.814779	0.79754	2077.44	14.47	2074.15	9.02838	2070.86	10.8585	100.318				1738.39	8.65999
PIC8-13C	638.204	16038.2	1.82969	10.1624	0.944644	3.6541	2.42184	0.269325	2.23002	0.920793	1537.37	30.5023	1561.4	19.3096	1594.04	17.6417	96.445				1661.7	18.8363
PIC8-14C	569.264	6491.29	1.29222	9.18975	0.825037	4.49002	2.45557	0.299261	2.31282	0.941867	1687.64	34.3413	1729.13	20.3946	1779.69	15.0476	94.828				1630.72	24.5577
PIC8-15C	153.81	1556.42	1.80496	8.75184	4.50239	5.08706	4.85242	0.322898	1.80955	0.372917	1803.87	28.4728	1833.95	41.199	1868.25	81.2791	96.5536				1802.13	6.54158
PIC8-16C	85.5027	20676.9	0.924175	10.0923	1.24418	3.82565	5.00159	0.280024	4.84437	0.968566	1591.48	68.3202	1598.16	40.2824	1606.95	23.1955	99.0374				1629.57	6.28297
PIC8-17C	152.3	53842.1	0.788954	10.0402	0.731253	4.02819	1.5903	0.293326	1.41221	0.888012	1658.13	20.6472	1639.9	12.9369	1616.6	13.6148	102.569				1637.81	44.5408
PIC8-19C	523.639	14376.7	1.70359	10.7033	0.573458	3.2026	1.81569	0.248611	1.72275	0.948814	1431.31	22.1124	1457.79	14.0503	1496.58	10.8478	95.6386				1493.77	10.2971
PIC8-20C	328.107	4925.95	1.00692	10.0564	0.862052	3.39819	3.58245	0.24785	3.47719	0.970616	1427.38	44.5226	1503.98	28.1122	1613.6	16.0567	88.4594				1694.65	18.654
PIC8-21C	350.628	6153.06	1.17663	9.147	0.675669	4.56572	7.04654	0.302891	7.01407	0.995392	1705.63	105.125	1743.03	58.7595	1788.19	12.3101	95.3832				2456.01	4.84787
PIC8-22C	146.439	6451.21	1.46161	9.95553	1.34416	3.9066	2.1473	0.282073	1.67456	0.779843	1601.79	23.7503	1615.05	17.3614	1632.35	24.9776	98.1279				1776.86	10.4368
PIC8-23C	116.854	143013	1.57671	9.1729	1.35677	4.97087	1.97749	0.330703	1.43862	0.727501	1841.79	23.0475	1814.38	16.7177	1783.03	24.7374	103.295				1508.52	54.0304
PIC8-24C	169.661	5170.93	1.80397	10.0726	1.27348	3.6651	2.06466	0.267747	1.62514	0.787121	1529.36	22.126	1563.8	16.4718	1610.61	23.7305	94.9554				1604.81	14.3745
PIC8-25C	201.334	81511.4	1.90109	9.39657	0.526648	4.77378	5.7836	0.325334	5.75957	0.995846	1815.73	91.1469	1780.3	48.5916	1738.99	9.65336	104.413				2420.72	7.85025
PIC8-26C	358.985	101294	1.46976	9.59893	0.29324	4.44274	2.3178	0.309295	2.29918	0.991965	1737.24	35.0131	1720.35	19.2128	1699.84	5.40075	102.2				1618.67	12.4255
PIC8-27C	162.719	25940.7	1.83084	8.71768	8.70431	4.87539	11.63	0.308255	7.71309	0.663207	1732.11	117.169	1798.01	98.296	1875.31	157.225	92.3641				1623.45	8.86178
PIC8-29C	450.764	26395	1.81081	10.6103	0.680845	3.47386	1.32437	0.267323	1.13596	0.857737	1527.2	15.4466	1521.3	10.442	1513.08	12.8494	100.933				1490.15	33.3955
PIC8-30C	150.53	14735.5	1.01797	10.0493	0.870418	3.89427	1.86629	0.283833	1.65089	0.88458	1610.64	23.5283	1612.5	15.0793	1614.91	16.2098	99.7354				1592.4	3.20585
PIC8-31C	181.281	211470	1.70569	9.95149	0.919959	4.04967	1.94226	0.292285	1.71056	0.880711	1652.94	24.9407	1644.23	15.8171	1633.11	17.0924	101.214				1560.53	8.71269
PIC8-33C	494.923	16900.3	2.72889	9.47532	0.417318	4.46322	1.03519	0.306719	0.947345	0.915142	1724.54	14.3346	1724.16	8.58736	1723.68	7.66544	100.05				1771.29	87.8451
PIC8-35C	337.894	57307.6	2.99027	5.45503	0.295204	13.0583	1.29997	0.516634	1.26601	0.973875	2684.89	27.801	2683.87	12.2614	2683.1	4.88241	100.067				1478.71	19.0396
PIC8-36C	151.438	160369	2.3343	10.4048	0.754089	3.68123	2.65964	0.277796	2.5505	0.958963	1580.25	35.7447	1567.31	21.2397	1549.9	14.1644	101.959				1633.2	11.4532
PIC8-37C	134.645	132630	1.5697	9.09811	0.959957	4.97394	1.4763	0.328209	1.12158	0.759724	1829.69	17.8662	1814.9	12.4815	1797.95	17.4713	101.766				1465.34	19.9229
PIC8-38C	309.708	2316.03	2.39873	9.92269	1.46262	3.78698	3.77002	0.272534	3.47473	0.921676	1553.65	47.9733	1589.99	30.2924	1638.49	27.1561	94.8223				1549.94	16.7406
PIC8-40C	134.232	1826.35	0.533236	10.6196	1.6565	3.3146	5.23704	0.255294	4.96816	0.948658	1465.72	65.1364	1484.5	40.8735	1511.41	31.2737	96.9767				1569.89	15.2755
PIC8-41C	293.422	202088	2.06767	9.43009	0.381171	4.61049	0.777339	0.315327	0.677469	0.871524	1766.87	10.4697	1751.17	6.48623	1732.46	6.99374	101.986				1527.94	7.61399
PIC8-43C	328.861	2717.28	4.5987	9.03758	1.02799	4.85168	3.89058	0.318012	3.75232	0.964461	1780.01	58.3652	1793.91	32.7648	1810.09	18.6798	98.3386				1643.44	8.34407
PIC8-44C	298.665	5726.57	1.0812	10.0232	0.628522	3.88575	1.92307	0.282476	1.81746	0.945082	1603.82	25.8058	1610.73	15.5311	1619.75	11.6971	99.0166				1755.04	15.0075
PIC8-45C	329.733	5972.61	0.712167	8.95852	2.69379	4.91232	3.05821	0.31917	1.44782	0.473421	1785.67	22.5817	1804.38	25.806	1826.03	48.8613	97.7898				1594.57	12.7656
PIC8-46C	424.305	3842.68	0.682254	9.85185	1.05405	4.0653	2.24342	0.290475	1.98037	0.88275	1643.9	28.7361	1647.37	18.2841	1651.78	19.5372	99.5229				1817.46	23.1687
PIC8-49C	518.63	17188.1	2.138	9.39967	0.47243	4.60436	1.13467	0.313892	1.03164	0.909201	1759.83	15.888	1750.06	9.46576	1738.39	8.65999	101.233				1605.75	7.93676
PIC8-54C	248.435	69864.7	0.714667	9.79926	1.01753	4.28137	3.81957	0.30428	3.68154	0.963863	1712.5	55.3683	1689.78	31.4499	1661.7	18.8363	103.057				1504.83	61.0226
PIC8-55C	244.786	4498.39	0.754686	9.96425	1.32129	4.19351	3.27719	0.303055	2.99902	0.915121	1706.44	44.9639	1672.75	26.875	1630.72	24.5577	104.643				1639.95	12.0265
PIC8-57C	335.249	642684	1.45	9.07721	0.359619	4.95444	1.45812	0.326172	1.41308	0.969109	1819.8	22.4044	1811.58	12.3197	1802.13	6.54158	100.98				1905	16
PIC8-58C	230.533	27009.5	0.556313	9.97043	0.337985	3.99426	2.79243	0.288835	2.7719	0.992648	1635.7	40.0455	1633.03	22.6804	1629.57	6.28297	100.376				1681	26
PIC8-59C	127.907	12004.8	0.978308	9.92631	2.39841	4.04593	3.23602	0.291276	2.17243	0.671328	1647.9	31.5902	1643.48	26.3521	1637.81	44.5408	100.616				1552	49
PIC8-60C	343.941	13537.5	0.845163	10.7192	0.544141	3.37243	1.48056	0.262183	1.37694	0.930014	1501	18.4382	1498.01	11.5956	1493.77	10.2971	100.484				2351.6	14
PIC8-61C	606.395	3944.67	1.15399	9.626	1.01192	4.25689	2.41276	0.297192	2.19031	0.9078	1677.37	32.3489	1685.07	19.841	1694.65	18.654	98.9803				1790	67
PIC8-63C	168.574	111005	1.36903	6.24865	0.286695	10.845	1.91136	0.49149	1.88973	0.988687	2577.12	40.1439	2509.93	17.771	2456.01	4.84787	104.931				1820	18
PIC8-66C	435.989	38817	23.8803	9.20404	0.572071	4.95885	4.80078	0.331023	4.76657	0.992875	1843.34	76.4218	1812.33	40.5874	1776.86	10.4368	103.742				1849	33
PIC8-67C	122.607	20990.6	0.87004	10.6359	2.86033	3.37548	3.1359	0.260381	1.28545	0.409915	1491.79	17.1192	1498.72	24.5689	1508.52	54.0304	98.8908				1870	23
PIC8-68C	184.136	138411	1.37464	10.1039	0.770781	3.8624	1.3675	0.28304	1.12958	0.826018	1606.65	16.0636	1605.86	11.0301	1604.81	14.3745	100.115				1990	34
PIC8-69C	486.001	6927.93	2.35045	6.38022	0.462749	9.28413	1.93549	0.429611	1.87936	0.970998	2303.96	36.4074	2366.45	17.7435	2420.72	7.85025	95.1768				1673	16
PIC8-70C	183.595	81101	0.992997	10.029	0.667564	4.02186	2.12056	0.29254	2.01274	0.949156	1654.21	29.3664	1638.63	17.2459	1618.67	12.4255	102.195				2652.2	27
PIC8-72C	179.566	6497.71	1.61922	10.0033	0.476422	3.91845	1.19577	0.284287	1.09676	0.917202	1612.92	15.6505	1617.5	9.67335	1623.45	8.86178	99.3516				1569	19
PIC8-74C	161.1	12512.7	0.917979	10.7397	1.76386	3.31289	2.69101	0.258047	2.03233	0.755228	1479.84	26.8731	1484.09	20.9916	1490.15	33.3955	99.3081				1792.9	26
PIC8-75C	603.07	285444	7.88184	10.1713	0.171628	3.85517	1.5228	0.284394	1.5131	0.993628	1613.46	21.5978	1604.35	12.2782	1592.4	3.20585	101.322				1658	45
PIC8-76C	272.373	193242	1.51237	10.346	0.464502	3.70879	2.50377	0.278295	2.4603	0.98264	1582.77	34.5291	1573.27	20.0264	1560.53	8.71269	101.425				1792	19
PIC8-78C	312.197	2969.98	1.16639	9.23212	4.80855	4.24296	5.59299	0.284098	2.85646	0.510722	1611.97	40.7402	1682.37	45.99	1771.29	87.8451	91.0052				1610	15
PIC8-80C	335.023	6301.01	0.694461	10.8048	1.00409	3.11251	2.57164	0.243908	2.36751	0.920626	1406.98	29.9262	1435.78	19.765	1478.71	19.0396	95.1494				1870	14
PIC8-82C	168.964	148041	0.79828	9.951	0.616395	4.17686	1.48479	0.30145	1.3508	0.909758	1698.49	20.1697	1669.49	12.1646	1633.2	11.4532	103.998				1740	15
PIC8-83C	145.808	64007.4	1.0018	10.8812	1.04878	3.30226	2.03038	0.260607	1.73853	0.85626	1492.95	23.1691	1481.59	15.8255	1465.34	19.9229	101.884				1639	35
PIC8-86C	152.068	12173.1	0.630826	10.4046	0.89124	3.60079	2.50727	0.271719	2.34352	0.93469	1549.52	32.2789	1549.71	19.9274	1549.94	16.7406	99.973				1654.5	13
PIC8-87C	377.749	5061.01	0.9436	10.2945	0.81546	3.29927	2.20414	0.246332	2.04774	0.929045	1419.53	26.0905	1480.88	17.1764	1569.89	15.2755	90.4222				1730	22
PIC8-88C	412.713	9092.65	1.03307	10.5269	0.404186	3.40173	2.74	0.259717	2.71002	0.98906	1488.39	36.0183	1504.79	21.5041	1527.94	7.61399	97.4116				1513	19
PIC8-89C	221.499	248028	1.21496	9.89626	0.449661	4.03475	1.08328	0.289592	0.985542	0.909779	1639.49	14.2668	1641.23	8.81493	1643.44	8.34407	99.7596				1806	14
PIC8-93C	138.395	39156.8	1.52312	9.31457	0.820325	4.22594	2.9154	0.285486	2.79761	0.959598	1618.93	40.0525	1679.07	23.9424	1755.04	15.0075	92.2448				1583	39
PIC8-94C	153.84	49322.2	0.76102	10.1595	0.683603	4.00298	1.6268	0.294955	1.4762	0.907426	1666.24	21.6754	1634.8	13.2173	1594.57	12.7656	104.495				1756.8	18
PIC8-96C	233.652	3199	1.35098	9.00092	1.27613	4.90745	1.68351	0.320362	1.09804	0.652236	1791.5	17.1746	1803.54	14.2013	1817.46	23.1687	98.5713				1646	15
PIC8-97C	231.271	393071	2.63158	10.0988	0.425638	4.00108	1.75336	0.293053	1.70091	0.970087	1656.77	24.8504	1634.42	14.2444	1605.75	7.93676	103.177				1713	48
PIC8-98C	140.859	25578	0.964836	10.6567	3.22871	3.57659	4.8524	0.276434	3.62232	0.746501	1573.38	50.5716	1544.35	38.5231	1504.83	61.0226	104.555				1588	22
PIC8-99C	142.446	177924	1.59763	9.91486	0.647812	4.05612	1.82988	0.291673	1.71138	0.935238	1649.88	24.9121	1645.53	14.9066	1639.95	12.0265	100.605				1602	22
1. Analyses with >10% uncertainty (1-sigma) in 206Pb/238U age are not included.																					1710	25
2. Analyses with >10% uncertainty (1-sigma) in 206Pb/207Pb age are not included, unless 206Pb/238U age is <500 Ma.																					1534	49
3. Reported ages determined from 206Pb/207Pb age for analyses with 206Pb/238Uage > 1000 Ma.																					1508	24
4. Concordance is based on 206Pb/238U age / 206Pb/207Pb age.																					1707	11
5. Analyses with 206Pb/238U age > 500 Ma and with >20% discordance (<80% concordance) are not included.																					1611	19
6. Analyses with 206Pb/238U age > 500 Ma and with >5% reverse discordance (<105% concordance) are not included.																					1726.4	16
7. All uncertainties are reported at the 1-sigma level, and include only measurement errors.																					1730	24
8. Systematic errors are as follows (at 2-sigma level): [sample 1: 2.5% (206Pb/238U) & 1.4% (206Pb/207Pb)]																					1783	35
9. U concentration and U/Th are calibrated relative to Sri Lanka zircon standard and are accurate to ~20%.																					1719	23
10. Common Pb correction is from measured 204Pb with common Pb composition interpreted from Stacey and Kramers (1975).																					1573	13
11. Common Pb composition assigned uncertainties of 1.5 for 206Pb/204Pb, 0.3 for 207Pb/204Pb, and 2.0 for 208Pb/204Pb.																					1648	19
12. U/Pb and 206Pb/207Pb fractionation is calibrated relative to fragments of a large Sri Lanka zircon of 563.5 ± 3.2 Ma (2-sigma).																					1631	20
13. U decay constants and composition as follows: 238U = 9.8485 x 10-10, 235U = 1.55125 x 10-10, 238U/235U = 137.88.																					1506	16
																					1855	18
University of New Brunswick analyses																					1644	19
						Isotope ratios					Apparent ages (Ma)										1680	67
Analysis	U	Pb*	U/Th	206Pb*	±	207Pb*	±	206Pb*	±	error	206Pb*	±2SE	207Pb*	±2SE	207Pb*	±2SE	Conc				1622	25
	(ppm)	%		207Pb*	(%)	235U	(%)	238U	(%)	corr.	238U	(Ma)	235U	(Ma)	206Pb*	(Ma)	(%)				1592	23
Sample J10-PIC8: Piedra Lumbre Formation quartzite, Picuris Mountains, New Mexico (N 36° 16.335', W 105° 43.436')																					1735	17
PIC8 Z2-50	360	97.84	2.067	8.51064	1.19149	4.259	3.75675	0.2669	3.74672	0.41014	1525	51	1685	30	1905	16	80.0525				1603	29
PIC8 Z1-22	120.4	98.17	1.455	9.77517	2.15054	3.292	2.18712	0.2342	2.13493	0.5504	1356	26	1477	17	1681	26	80.6663				1494	27
PIC8 Z1-69	274.9	98.64	1.484	10.4493	3.23929	2.869	3.48554	0.2178	2.57117	0.79394	1272	30	1370	24	1552	49	81.9588				1623	9.7
PIC8 Z1-100	630	98.43	3.38	6.64938	1.13039	7.228	1.07914	0.3483	1.89492	0.86488	1928	31	2141	9.3	2351.6	14	81.9867				1726.9	10
PIC8 Z2-52	374.2	99.4	2.479	9.09918	5.18653	3.941	6.59731	0.2591	2.31571	0.59508	1485	31	1621	44	1790	67	82.9609				1631	25
PIC8 Z2-84	784	99.73	1.64	9.00901	1.26126	4.074	2.30731	0.2662	2.93013	0.59472	1521	41	1648	20	1820	18	83.5714				1748	15
PIC8 Z1-45	328	99.33	2.973	8.87311	2.39574	4.157	3.36781	0.2703	4.06955	0.7854	1546	59	1664	32	1849	33	83.6128				1830	11
PIC8 Z1-93	1792	99.09	4.64	8.726	1.39616	4.327	1.17865	0.2759	1.59478	0.7766	1571	22	1701	9.3	1870	23	84.0107				1635	13
PIC8 Z1-13	281.9	97.97	3.94	8.19001	2.2932	4.968	1.48953	0.2968	1.95418	0.33313	1675	29	1813	12	1990	34	84.1709				1687	19
PIC8 Z2-91	333.9	>99.9	1.386	9.77517	1.27077	3.485	1.5495	0.2446	1.26738	0.65788	1410	16	1526	12	1673	16	84.2797				1771	12
PIC8 Z1-51	388	>99.9	1.58	5.57414	2.17391	10.34	3.57834	0.4176	1.86782	0.79153	2249	35	2464.9	17	2652.2	27	84.7975				1552	23
PIC8 Z1-61	244	99.4	2.2	10.3093	1.64948	3.088	2.36399	0.2301	2.30335	0.83203	1334	28	1427	18	1569	19	85.0223				1611	17
PIC8 Z1-28	621.8	99.61	3.55	9.14913	1.64684	4.01	2.36908	0.2684	3.16692	0.90725	1531	44	1637	20	1792.9	26	85.3924				1795	15
PIC8 Z1-62	309	98	1.193	9.85222	3.05419	3.442	3.48635	0.2465	1.98783	0.59481	1420	25	1515	25	1658	45	85.6454				1651	24
PIC8 Z1-74	454	99.28	2.278	9.16674	1.37501	4.052	0.863771	0.2694	1.63326	0.58856	1538	22	1646.1	7	1792	19	85.8259				1549	13
PIC8 Z2-41	675	99.771	7.26	10.0756	1.10831	3.29	1.33739	0.2397	1.335	0.67381	1385	17	1478.6	10	1610	15	86.0248				1759	13
PIC8 Z2-22	569	98.53	2.765	8.76424	1.05171	4.514	1.39566	0.2848	1.19382	0.73848	1615	17	1732	12	1870	14	86.3636				1553	18
PIC8 Z2-94	293	99.08	1.052	9.33707	1.30719	3.932	1.29705	0.2674	1.3463	0.61076	1527	18	1619	11	1740	15	87.7586				1841	20
PIC8 Z1-21	606	99.88	1.285	9.95025	2.28856	3.457	1.79346	0.2505	1.67665	0.38845	1441	22	1518	14	1639	35	87.9195				1507	18
PIC8 Z2-62	543	99.82	2.92	9.87264	1.28344	3.575	1.65035	0.2547	1.53121	0.55979	1462	19	1543.3	13	1654.5	13	88.3651				1486	18
PIC8 Z1-65	650	99.66	1.499	9.4162	2.35405	3.926	4.33011	0.2706	3.69549	0.50539	1543	49	1618	30	1730	22	89.1908				1638	15
PIC8 Z2-65	393.9	99.79	1.134	10.6123	1.3796	3.097	1.87278	0.2367	1.39417	0.8084	1369	17	1430	14	1513	19	90.4825				1507	22
PIC8 Z2-18	478	99.92	2.58	9.05715	0.996287	4.385	1.61916	0.2889	1.31533	0.75852	1636	19	1709	14	1806	14	90.5869				1757	15
PIC8 Z1-27	268.8	99.74	1.485	10.1937	2.95617	3.319	2.28985	0.2495	2.52505	0.73409	1435	33	1488	19	1583	39	90.6507				1618	29
PIC8 Z1-6	444	99.87	1.665	9.32836	1.39925	4.129	1.11407	0.2803	1.56975	0.55846	1593	22	1659.6	8.8	1756.8	18	90.6762				1627	20
PIC8 Z2-60	361.3	>99.9	2.26	9.90099	1.28713	3.611	1.74467	0.2607	1.53433	0.4962	1493	21	1551	15	1646	15	90.7047				1713	16
PIC8 Z2-79	447.5	99.89	0.746	9.48767	3.32068	3.961	2.24691	0.273	2.85714	0.069649	1556	41	1626	17	1713	48	90.8348				1852	13
PIC8 Z2-19	141.7	99.6	1.337	10.1626	1.62602	3.412	1.90504	0.2514	1.67064	0.62563	1445	22	1505	15	1588	22	90.995				1779.4	16
PIC8 Z1-48	510	99.96	8.85	10.1184	1.51776	3.429	1.80811	0.2542	2.7144	0.82122	1462	36	1511	14	1602	22	91.2609				1613	17
PIC8 Z2-89	181.5	99.91	1.727	9.51475	1.71265	3.984	2.76104	0.2756	2.1045	0.67784	1569	29	1629	23	1710	25	91.7544				1655	47
PIC8 Z1-79	230	99.85	1.02	10.4384	3.23591	3.216	2.51866	0.2449	2.81748	0.36943	1414	37	1464	20	1534	49	92.1773				1485	21
PIC8 Z1-38	90.9	99.87	0.737	10.5932	2.11864	3.162	1.99241	0.2423	1.93974	0.31376	1399	24	1448	15	1508	24	92.7719				1547	20
PIC8 Z2-2	336	99.78	2.216	9.52381	1.04762	4.018	1.51817	0.2785	1.43627	0.71599	1584	20	1637	12	1707	11	92.7944				1788	13
PIC8 Z2-53	368	99.92	0.971	10.0908	1.31181	3.561	2.69587	0.2619	1.87094	0.62722	1499	25	1540	21	1611	19	93.0478				1600	23
PIC8 Z1-30	1063	>99.9	87.2	9.43841	1.41576	4.115	2.91616	0.2831	3.07312	0.6412	1606.7	36	1656.8	18	1726.4	16	93.0665				1619	19
PIC8 Z1-66	207.6	99.81	2.314	9.4162	1.78908	4.113	4.13324	0.2846	3.23261	0.65325	1614	41	1655	23	1730	24	93.2948				1741	19
PIC8 Z2-58	344.6	99.988	3.1	9.31099	2.23464	4.36	2.75229	0.2946	3.39443	0.56832	1664	54	1703	29	1783	35	93.3259				1763	15
PIC8 Z2-98	272	99.74	1.764	9.5057	1.80608	4.084	1.76298	0.283	1.83746	0.24387	1606	27	1652	16	1719	23	93.4264				1589.8	13
PIC8 Z2-51	307.4	99.872	5.09	10.3093	1.03093	3.49	1.46132	0.2592	1.23457	0.7548	1483	16	1523	12	1573	13	94.2784				1794	14
PIC8 Z2-44	663	99.942	1.921	9.85222	1.37931	3.814	3.4085	0.274	3.61314	0.26422	1561	53	1598	31	1648	19	94.7209				1833	21
PIC8 Z2-97	127.4	99.93	1.482	9.99001	1.5984	3.711	3.23363	0.2712	3.0236	0.41229	1546	43	1572	28	1631	20	94.7885				1750	14
PIC8 Z2-67	242	99.917	2.025	10.6157	1.4862	3.25	1.90769	0.2488	1.32637	0.66263	1432	17	1470	15	1506	16	95.0863				1579	14
PIC8 Z2-96	318	99.99	10.87	8.81834	1.5873	4.881	2.86826	0.3153	2.12496	0.50207	1767	33	1798	24	1855	18	95.2561				1588	14
PIC8 Z1-87	117.9	>99.9	1.873	9.9108	1.68484	3.815	3.4076	0.2764	3.25615	0.59362	1573	47	1596	31	1644	19	95.6813				1789	17
PIC8 Z1-37	115	99.61	1.449	9.69932	4.55868	4.007	3.99301	0.2836	1.69252	0.30825	1609	24	1633	28	1680	67	95.7738				1468	15
PIC8 Z2-57	690	99.93	8.25	9.94036	1.68986	3.717	2.95938	0.2725	3.22936	0.43961	1554	47	1574	29	1622	25	95.8076				1525	17
PIC8 Z1-34	247.3	>99.9	1.431	10.1215	1.82186	3.572	2.4916	0.2678	2.3525	0.50626	1529	33	1545	20	1592	23	96.0427				1538	24
PIC8 Z1-54	444	99.952	2.403	9.44287	1.51086	4.283	1.09736	0.2959	1.72356	0.34524	1671	26	1692	9.4	1735	17	96.3112				1581	20
PIC8 Z1-47	367	>99.9	0.722	10.0806	2.52016	3.64	11.2637	0.2708	9.97046	0.53021	1545	110	1561	50	1603	29	96.3818				1514	27
PIC8 Z1-84	125.8	99.84	0.663	10.6383	1.91489	3.241	1.66615	0.2506	1.71588	0.60152	1441	22	1466	13	1494	27	96.4525				1779	29
PIC8 Z2-77	396	99.954	1.916	10.001	1.0001	3.791	1.66183	0.2752	1.5625	0.52068	1567	22	1590	14	1623	9.7	96.5496				1882	15
PIC8 Z2-3	612	>99.9	1.969	9.47957	0.89108	4.307	1.43952	0.2954	1.32024	0.9051	1668	19	1693	12	1726.9	10	96.5893				1762.4	12
PIC8 Z1-23	186.3	99.65	0.959	10.02	2.20441	3.74	2.21925	0.2762	2.31716	0.33971	1577	32	1578	18	1631	25	96.6891				1727	11
PIC8 Z1-14	247.2	99.88	1.826	9.38967	1.40845	4.39	3.41686	0.3007	3.32557	0.1886	1695	55	1710	35	1748	15	96.968				1800	16
PIC8 Z2-46	371	>99.9	2.11	8.98473	0.98832	4.816	1.16279	0.317	1.16719	0.50817	1775	18	1787	10	1830	11	96.9945				1861	30
PIC8 Z2-10	347.7	99.963	2.068	10.02	1.2024	3.85	1.74026	0.279	1.50538	0.50985	1586	21	1602	15	1635	13	97.0031				1547	33
PIC8 Z1-9	639.3	>99.9	3.121	9.60615	1.53698	4.098	1.92777	0.2897	1.96755	0.53187	1640	29	1653	15	1687	19	97.214				1604	12
PIC8 Z1-73	397	>99.9	1.881	9.25497	1.20315	4.535	0.793826	0.3063	1.53444	0.64279	1722	23	1736.8	6.6	1771	12	97.2332				1728	14
PIC8 Z1-91	202.9	99.85	2.025	10.4058	1.66493	3.458	1.33025	0.2642	1.74111	0.40258	1511	24	1516	10	1552	23	97.3582				2698.1	10
PIC8 Z1-8	303	99.943	1.883	10.0604	1.40845	3.753	1.19904	0.276	1.63043	0.41947	1571	23	1586.1	9.6	1611	17	97.5171				1507	23
PIC8 Z2-75	398.8	99.978	4.602	9.13242	1.27854	4.688	4.26621	0.3122	4.164	0.49885	1751	59	1764	27	1795	15	97.5487				1609	18
PIC8 Z1-64	348	>99.9	2.104	9.84252	2.16535	3.913	17.6335	0.284	14.4366	0.65284	1611	170	1618	77	1651	24	97.5772				2492.5	13
PIC8 Z2-32	209.1	>99.9	1.669	10.3918	1.14309	3.538	1.24364	0.2655	1.12994	0.3132	1518	16	1535.8	9.8	1549	13	97.9987				1502	89
PIC8 Z2-9	172	99.972	1.893	9.30233	1.30233	4.551	1.34036	0.307	1.20521	0.39174	1725	18	1741.3	11	1759	13	98.0671				1719.2	14
PIC8 Z2-78	705	99.987	8.04	10.3734	1.76349	3.501	8.28335	0.2667	8.62392	0.79872	1523	93	1530	41	1553	18	98.0683				1579	12
PIC8 Z1-98	561.5	>99.9	4.2	8.86525	1.32979	4.997	1.54092	0.3234	2.10266	0.54296	1806	34	1822	14	1841	20	98.0989				1721	36
PIC8 Z1-11	377	99.982	1.405	10.6542	1.2785	3.318	1.50693	0.2585	2.08897	0.57053	1482	28	1489.6	12	1507	18	98.3411				1746	16
PIC8 Z2-71	174.9	>99.9	0.986	10.7066	1.606	3.249	1.63127	0.2548	1.17739	0.31075	1463	16	1467	13	1486	18	98.4522				1779	15
PIC8 Z1-58	327.7	99.967	1.515	9.8912	1.48368	3.918	1.32721	0.2845	1.61687	0.35576	1614	23	1620	11	1638	15	98.5348				2580.8	10
PIC8 Z1-99	172.2	99.84	1.172	10.7066	1.71306	3.357	1.51921	0.2591	1.85257	0.6461	1485	25	1494	12	1507	22	98.5401				1575.3	14
PIC8 Z1-39	262.9	>99.9	2.554	9.31099	1.48976	4.507	1.17595	0.3084	1.6537	0.53998	1733	26	1734	9.8	1757	15	98.634				1779	11
PIC8 Z2-30	83.8	>99.9	1.146	10.0604	2.21328	3.84	3.125	0.2809	2.63439	0.42743	1596	38	1600	28	1618	29	98.6403				1733	44
PIC8 Z1-81	147.8	>99.9	1.06	10.02	1.70341	3.876	1.34159	0.2831	1.66019	0.3596	1606	24	1608	11	1627	20	98.7093				1552	16
PIC8 Z1-29	333	>99.9	2.528	9.54198	1.24046	4.32	1.57407	0.3001	2.16594	0.56228	1692	32	1696	13	1713	16	98.7741				2355	20
PIC8 Z1-94	310.3	99.984	2.549	8.78735	1.23023	5.065	1.20434	0.3283	1.6753	0.45191	1830	27	1831	10	1852	13	98.8121				1793	14
PIC8 Z1-19	256.2	>99.9	1.439	9.22169	1.29104	4.682	0.961128	0.3138	1.5615	0.5193	1760	24	1764.1	8	1779.4	16	98.9097				1782	16
PIC8 Z1-56	242	>99.9	0.942	10.0402	1.40562	3.835	0.990874	0.281	1.60142	0.36347	1596	23	1599.2	8.2	1613	17	98.9461				1758	31
PIC8 Z1-43	107.1	99.95	1.593	9.80392	3.33333	4.028	3.47567	0.2897	1.72592	0.29938	1640	25	1637	25	1655	47	99.0937				1719	13
PIC8 Z1-55	253.4	99.98	1.22	10.7296	1.82403	3.283	2.40634	0.2565	2.69006	0.2459	1472	37	1476	20	1485	21	99.1246				1601	16
PIC8 Z2-47	106.2	99.89	1.248	10.4275	1.56413	3.549	1.85968	0.2685	1.48976	0.42908	1534	21	1537	15	1547	20	99.1597				1572	15
PIC8 Z1-95	173.3	99.99	2.085	9.14913	1.46386	4.765	1.61595	0.3172	1.8285	0.65603	1775	29	1779	14	1788	13	99.2729				1568	25
PIC8 Z1-49	207.1	99.95	1.018	10.1112	1.82002	3.771	1.19332	0.2797	1.71612	0.45129	1589	24	1589	9.1	1600	23	99.3125				1701	38
PIC8 Z1-72	577.9	>99.9	5.4	10.02	1.40281	3.869	1.4474	0.2833	2.15319	0.49113	1608	30	1606.8	12	1619	19	99.3206				1608	18
PIC8 Z1-44	185.8	99.99	1.928	9.42507	1.69651	4.498	1.37839	0.3075	1.69106	0.6202	1730	26	1729	11	1741	19	99.3682				2654.6	14
PIC8 Z1-20	350.9	>99.9	4.513	9.28505	1.29991	4.626	1.08085	0.3123	1.63305	0.46252	1752	25	1756	8.8	1763	15	99.3761				1521	22
PIC8 Z1-71	326.9	99.984	0.931	10.2218	1.32884	3.729	1.09949	0.2777	1.69247	0.67933	1580	24	1577.6	9	1589.8	13	99.3836				1660.9	11
PIC8 Z2-61	134.5	99.96	0.492	9.19118	1.37868	4.764	1.67926	0.3187	1.44336	0.6718	1783	23	1779	14	1794	14	99.3868				1618	15
PIC8 Z1-90	191.1	>99.9	3.197	8.94454	1.61002	5.016	1.99362	0.3268	1.89718	0.76387	1822	30	1823	17	1833	21	99.3999				1610	16
PIC8 Z1-67	227.7	>99.9	1.883	9.33707	1.40056	4.552	1.14236	0.3099	1.67796	0.53212	1740	26	1740.5	9.7	1750	14	99.4286				1619	62
PIC8 Z2-69	414	>99.9	8.97	10.2229	1.02229	3.706	1.1333	0.2759	1.01486	0.4362	1570.6	14	1572	9.1	1579	14	99.468				1565	12
PIC8 Z2-92	366	>99.9	10.01	10.1999	1.32599	3.741	1.65731	0.2778	1.76386	0.67761	1580	25	1579.2	13	1588	14	99.4962				1689.3	13
PIC8 Z1-89	208	>99.9	2.31	9.09918	1.45587	4.78	1.79916	0.3181	2.16913	0.53299	1780	37	1779	17	1789	17	99.4969				1731	18
PIC8 Z2-12	272.8	99.78	1.709	10.8578	1.19435	3.209	1.71393	0.2545	1.76817	0.83857	1461	23	1459	13	1468	15	99.5232				1704.6	11
PIC8 Z1-5	121.6	>99.9	0.869	10.5708	1.79704	3.466	1.44259	0.2656	1.61898	0.29066	1518	22	1518	11	1525	17	99.541				1540	27
PIC8 Z1-15	163.4	99.904	1.709	10.4932	1.88877	3.521	2.13008	0.2678	2.38984	0.55994	1531	33	1530	18	1538	24	99.5449				1557	20
PIC8 Z2-11	104.2	99.85	1.472	10.2041	1.73469	3.728	2.09227	0.2766	1.95228	0.40258	1574	28	1577	17	1581	20	99.5572				1614	15
PIC8 Z2-40	148.3	99.89	0.637	10.5932	2.22458	3.416	1.96136	0.2632	1.63374	0.56697	1508	22	1506	15	1514	27	99.6037				1585	11
PIC8 Z2-56	232.1	>99.9	3.172	9.21659	1.84332	4.707	2.97429	0.3164	3.79267	0.75773	1772	61	1769	28	1779	29	99.6065				1589	15
PIC8 Z2-38	353	99.989	1.566	8.6881	1.12945	5.404	1.33235	0.3377	1.15487	0.58692	1875	19	1887	11	1882	15	99.6281				1741	13
PIC8 Z2-34	1340	99.933	2.87	9.29109	0.929109	4.69	4.05117	0.3138	3.82409	0.93631	1756	60	1759	30	1762.4	12	99.6369				1554	13
PIC8 Z2-73	156.3	>99.9	2.304	9.4697	1.23106	4.488	1.78253	0.3063	1.59974	0.72161	1722	24	1726	15	1727	11	99.7105				1545	16
PIC8 Z1-80	442.3	>99.9	3.17	9.10747	1.27505	4.858	2.676	0.3212	3.08219	0.40546	1795	51	1794.6	27	1800	16	99.7222				1541	15
PIC8 Z1-46	378.5	>99.9	2.567	8.77193	2.01754	5.241	1.39286	0.3337	1.55829	0.25391	1856	25	1858.7	11	1861	30	99.7313				1538	18
PIC8 Z2-81	111.5	99.91	1.454	10.3627	2.07254	3.54	1.94915	0.2704	2.2929	0.50367	1543	32	1540	16	1547	33	99.7414				1451	19
PIC8 Z2-95	198	99.964	0.931	10.1215	1.11336	3.837	1.35523	0.2817	1.24246	0.55427	1600	18	1599.2	11	1604	12	99.7506				1590	17
PIC8 Z2-83	216.3	>99.9	2.185	9.44287	1.22757	4.431	1.60235	0.3067	1.43463	0.54949	1724	22	1722	13	1728	14	99.7685				2265.4	8.1
PIC8 Z1-31	470.2	>99.9	1.175	5.40657	1.08131	13.184	0.667476	0.5185	1.54291	0.78276	2692	34	2692.4	6.3	2698.1	10	99.7739				1538	17
PIC8 Z1-35	231.7	>99.9	0.5349	10.6838	1.7094	3.416	1.66862	0.2628	1.86454	0.11754	1504	26	1507	13	1507	23	99.8009				1536	13
PIC8 Z1-76	129.4	>99.9	1.233	10.0604	1.60966	3.866	1.37093	0.2831	1.66019	0.45794	1606	24	1606	11	1609	18	99.8135				1624	22
PIC8 Z1-33	360.3	>99.9	1.232	6.09756	1.21951	10.593	0.94402	0.4711	1.6557	0.66119	2488	34	2488.3	8.9	2492.5	13	99.8195				1517	28
PIC8 Z1-77	335.3	99.935	1.776	10.6157	6.79406	3.364	7.72889	0.262	1.94656	0.68461	1500	26	1495	47	1502	89	99.8668				1675	14
PIC8 Z1-4	169	>99.9	1.6	9.48767	1.42315	4.405	1.13507	0.3052	1.57274	0.53271	1717	24	1712.1	9.3	1719.2	14	99.872				1609	13
PIC8 Z2-87	196.6	>99.9	1.71	10.352	1.44928	3.721	1.63934	0.2772	1.22655	0.4728	1577	17	1574	13	1579	12	99.8733				1799	19
PIC8 Z1-18	486	>99.9	2.486	9.51475	2.28354	4.414	0.883552	0.3057	2.12627	0.37408	1720	33	1715.9	7.2	1721	36	99.9419				1723.6	11
PIC8 Z1-53	286	99.942	3.596	9.34579	1.40187	4.545	1.14411	0.3111	1.67149	0.57024	1745	26	1741	9.2	1746	16	99.9427				1587	16
PIC8 Z2-55	123	99.972	2.591	9.18274	1.28558	4.785	1.5674	0.3176	1.1335	0.43705	1778	18	1782	13	1779	15	99.9438				1740	15
PIC8 Z2-39	532	99.982	1.577	5.79777	0.753711	11.65	1.20172	0.4924	1.1576	0.81859	2581	24	2576.8	11	2580.8	10	100.008				1758	14
PIC8 Z1-41	560	>99.9	10.12	10.268	1.23216	3.696	0.94697	0.2769	1.62514	0.68858	1576	23	1569.7	7.5	1575.3	14	100.044				1814	11
PIC8 Z2-86	351	>99.9	2.207	9.18274	1.10193	4.774	1.31965	0.3181	1.16316	0.5595	1780	18	1779	11	1779	11	100.056				1567	15
PIC8 Z1-7	62.6	>99.9	0.937	9.4518	3.02457	4.5	3.33333	0.3089	1.78051	0.47584	1734	27	1727	26	1733	44	100.058				1771.2	15
PIC8 Z2-37	123.8	>99.9	0.62	10.352	1.65631	3.62	1.68508	0.2724	1.13803	0.26541	1553	16	1551	14	1552	16	100.064				1752	14
PIC8 Z1-57	1044	>99.9	1.606	6.64452	1.19601	9.16	1.8559	0.4415	2.15176	0.92673	2357	44	2353	19	2355	20	100.085				1693.6	9.1
PIC8 Z2-99	121.9	>99.9	1.948	9.14077	1.37112	4.845	1.48607	0.3212	1.18306	0.36636	1795	18	1793	12	1793	14	100.112				1473	21
PIC8 Z2-54	174.2	>99.9	2.621	9.15751	1.37363	4.787	1.35784	0.3189	1.4111	0.40208	1784	22	1783	11	1782	16	100.112				1464.1	16
PIC8 Z2-28	215	>99.9	1.43	9.30233	2.13953	4.653	4.08339	0.3139	2.54858	0.15674	1760	40	1757	22	1758	31	100.114				1525	18
PIC8 Z2-70	176.6	>99.9	2.129	9.52381	1.2381	4.446	1.55196	0.3061	1.17609	0.58555	1721	18	1720	13	1719	13	100.116				1464	18
PIC8 Z1-59	201.2	>99.9	1.419	10.1112	1.51668	3.848	1.27339	0.2823	1.6649	0.5244	1603	23	1605	10	1601	16	100.125				1816	6
PIC8 Z2-13	144.8	>99.9	1.384	10.2459	1.43443	3.727	1.58304	0.2766	1.15691	0.47757	1574	16	1577	13	1572	15	100.127				1708	7
PIC8 Z2-21	184	99.957	1.914	10.2775	1.95272	3.723	1.69218	0.2759	1.70352	0.69931	1570	24	1579	14	1568	25	100.128				2342	11
PIC8 Z1-68	280	>99.9	3.43	9.65251	2.50965	4.354	1.63068	0.3027	2.60984	0.78009	1704	40	1705	14	1701	38	100.176				1792	7
PIC8 Z2-88	155.3	99.88	1.546	10.0503	1.50754	3.857	2.46305	0.2841	2.07673	0.54686	1611	30	1602	22	1608	18	100.187				1708	11.5
PIC8 Z1-60	121.6	99.88	0.95	5.52181	1.32523	12.78	2.9734	0.5117	3.12683	0.8961	2661	68	2660	32	2654.6	14	100.241				1803	8.5
PIC8 Z2-24	188.4	>99.9	1.874	10.5263	1.57895	3.48	2.29885	0.267	1.98502	0.50993	1525	27	1521	19	1521	22	100.263				1793	12
PIC8 Z2-72	502	>99.9	1.863	9.81065	0.951633	4.149	1.37383	0.295	1.35593	0.69868	1666	20	1663.1	11	1660.9	11	100.307				1751	11.5
PIC8 Z1-83	263.5	>99.9	1.828	10.018	1.40252	3.929	0.967167	0.2862	1.57233	0.41312	1623	23	1618.8	7.7	1618	15	100.309				2030	7.5
PIC8 Z2-63	176.2	99.92	0.607	10.0301	1.40421	3.917	1.73602	0.2848	1.26404	0.37527	1615	18	1615	14	1610	16	100.311				1734	7
PIC8 Z1-3	148.7	>99.9	1.712	9.95025	4.57711	3.946	2.20476	0.2868	2.23152	0.28939	1625	33	1622	17	1619	62	100.371				1705	7.5
PIC8 Z2-68	469	>99.9	3.654	10.3199	1.00103	3.693	1.19144	0.276	1.08696	0.50217	1571	15	1570.4	9.5	1565	12	100.383				1742	7.5
PIC8 Z1-1	322	>99.9	1.34	9.63113	1.25205	4.288	1.04944	0.3012	1.62683	0.54791	1697	24	1692.7	8.4	1689.3	13	100.456				1715	9
PIC8 Z2-101	266	99.977	22.2	9.40734	1.59925	4.53	4.41501	0.3097	3.55182	0.24362	1739	53	1736	31	1731	18	100.462				1789	7.5
PIC8 Z2-6	491.7	>99.9	1.606	9.56938	0.91866	4.403	1.86237	0.3044	1.83968	0.84258	1713	28	1713	16	1704.6	11	100.493				1471	10
PIC8 Z2-43	50.9	99.77	0.813	10.5042	2.83613	3.6	3.05556	0.2715	1.65746	0.31799	1548	23	1544	23	1540	27	100.519				1864	9.5
PIC8 Z1-2	90.4	99.87	1.339	10.3627	1.96891	3.642	1.72982	0.275	1.67273	0.41573	1566	23	1559	14	1557	20	100.578				1710	8
PIC8 Z1-24	233.1	>99.9	1.895	10.0402	1.40562	3.944	0.988844	0.2868	1.56904	0.52093	1625	23	1622	8.1	1614	15	100.682				1774	9.5
PIC8 Z2-64	682	>99.9	6.06	10.2459	0.952869	3.751	1.253	0.281	1.1032	0.51903	1596	16	1582	9.9	1585	11	100.694				1796	7.5
PIC8 Z1-17	465	>99.9	10.67	10.2072	1.32694	3.797	0.974454	0.2819	1.56084	0.29074	1600.8	22	1594.1	8.2	1589	15	100.743				1760	11.5
PIC8 Z2-7	183.6	>99.9	2.243	9.3633	1.31086	4.625	1.53514	0.3127	1.11928	0.52589	1754	18	1752	13	1741	13	100.747				1723	10.5
PIC8 Z2-59	332.7	>99.9	2.197	10.3627	1.03627	3.64	1.26374	0.275	1.16364	0.57447	1566	16	1558	10	1554	13	100.772				1731	14.5
PIC8 Z2-76	142.7	>99.9	2.003	10.4275	1.45985	3.598	1.61201	0.2733	1.24405	0.4203	1557	17	1550	13	1545	16	100.777				1862	7.5
PIC8 Z1-52	201.3	99.99	1.431	10.4384	1.56576	3.608	1.41353	0.2727	1.61349	0.28089	1554	22	1553	11	1541	15	100.844				1725	8
PIC8 Z1-40	164.3	99.954	1.079	10.5042	1.68067	3.597	1.30664	0.272	1.65441	0.42669	1551	23	1548	10	1538	18	100.845				1698	12
PIC8 Z2-85	142.3	>99.9	0.972	10.989	1.75824	3.179	1.7301	0.2549	1.09847	0.22031	1463.3	14	1451	13	1451	19	100.848				1737	9
PIC8 Z2-74	168.8	99.98	0.83	10.1937	1.42712	3.819	1.59728	0.2826	1.38004	0.59106	1604	20	1595	13	1590	17	100.881				1683	8
PIC8 Z2-1	374.1	>99.9	2.335	6.98324	0.768156	8.37	1.31422	0.4274	1.14647	0.79172	2293	22	2272	11	2265.4	8.1	101.218				1614	10
PIC8 Z2-26	143.7	99.98	1.207	10.4712	1.36126	3.616	1.74226	0.2733	1.57336	0.51328	1557	21	1551	13	1538	17	101.235				1796	10
PIC8 Z2-17	252	>99.9	5.39	10.4603	1.25523	3.614	1.71555	0.2733	1.53677	0.7555	1557	21	1552	14	1536	13	101.367				1736	10.5
PIC8 Z1-86	92.6	99.87	0.764	9.97009	1.79462	4.001	1.49963	0.2915	1.68096	0.20235	1649	24	1634	12	1624	22	101.539				1707	10
PIC8 Z2-49	55	>99.9	1.33	10.5708	2.21987	3.554	2.30726	0.2702	1.33235	0.27089	1543	18	1538	19	1517	28	101.714				1694	9
PIC8 Z2-4	188.5	>99.9	2.545	9.70874	1.26214	4.289	1.46887	0.3023	1.12471	0.35761	1704	17	1692	12	1675	14	101.731				1726	14.5
PIC8 Z2-25	192.7	>99.9	1.76	10.1523	1.3198	3.962	1.43867	0.2892	1.14108	0.41498	1637	17	1625	12	1609	13	101.74				1789	12.5
PIC8 Z2-90	526	99.983	2.32	9.09918	1.45587	4.911	3.05437	0.3287	2.5251	0.51663	1832	41	1807	23	1799	19	101.834				2785.9	4.6
PIC8 Z2-35	370	>99.9	7.31	9.4697	1.04167	4.551	1.12063	0.314	1.05096	0.39207	1760	16	1739.7	9.4	1723.6	11	102.112				1847	7.5
PIC8 Z2-33	147.8	>99.9	0.874	10.1626	1.42276	3.839	1.48476	0.2858	1.22463	0.39367	1621	18	1604	12	1587	16	102.142				1495	16.5
PIC8 Z2-27	199	99.969	4.91	9.42507	1.22526	4.7	1.7234	0.3207	1.49673	0.69144	1793	23	1765	15	1740	15	103.046				1726	13.5
PIC8 Z2-42	116.5	>99.9	1.82	9.37207	1.49953	4.835	1.6546	0.3249	1.16959	0.34407	1813	18	1790	14	1758	14	103.129				1716	11
PIC8 Z2-16	233.3	>99.9	1.6	9.01713	1.08206	5.164	1.33617	0.3374	1.24481	0.37322	1874	20	1847	11	1814	11	103.308				1718	8
PIC8 Z2-8	124.2	>99.9	1.076	10.3413	1.55119	3.845	1.6645	0.2858	1.22463	0.30279	1620	17	1604	13	1567	15	103.382				1740	9
PIC8 Z1-96	433	>99.9	5.787	9.24727	1.29462	4.922	0.975213	0.3296	1.57767	0.73992	1836	25	1805.9	8.4	1771.2	15	103.659				1795	7
PIC8 Z2-48	101	>99.9	0.9244	9.33707	1.40056	4.872	1.66256	0.3263	1.31781	0.41151	1820	20	1795	14	1752	14	103.881				1717	9
PIC8 Z2-14	323	>99.9	2.392	9.64785	0.964785	4.506	1.1984	0.3148	1.08005	0.62125	1764	17	1731.2	9.9	1693.6	9.1	104.157				2528	12.5
PIC8 Z2-45	73	>99.9	0.977	10.8108	1.83784	3.437	1.83299	0.2696	1.22404	0.22513	1538	17	1514	14	1473	21	104.413				1736	7
PIC8 Z2-36	496	>99.9	1.513	10.9063	1.30876	3.367	1.2771	0.2676	1.34529	0.66819	1529	19	1496	10	1464.1	16	104.433				1710	13.5
PIC8 Z1-88	98	>99.9	0.963	10.5374	1.79136	3.652	1.64294	0.282	1.66667	0.29552	1601	24	1561	13	1525	18	104.984				1756	10.5
PIC8 Z2-15	174	>99.9	1.615	10.8696	1.52174	3.428	1.54609	0.2695	1.2616	0.48116	1538	17	1513	12	1464	18	105.055				1726	6.5
																					1768	16
Sample CD12-5: Lower Marquenas Formation quartzite, Picuris Mountains, New Mexico (N 36° 12.224', W 105° 48.420')																					1794	10.5
Sequence 113	648	>99.9	4.938	9.00901	0.540541	5.103	1.27376	0.3318	0.527426	0.66851	1847	8.5	1836.1	10.5	1816	6	98.06				1719	10
Sequence 84	565	>99.9	2.692	9.54654	0.572792	4.495	1.22358	0.3106	0.53123	0.6033	1744	8	1730.3	10.5	1708	7	98.05				1746	10.5
Sequence 96	213.2	>99.9	1.946	6.67557	0.567423	8.91	1.29068	0.4394	0.546199	0.56666	2348	11	2328	11.5	2342	11	98.03				1651	14
Sequence 116	499	>99.9	3.231	9.11993	0.592795	4.908	1.22249	0.3266	0.551133	0.53787	1823	8.5	1803.1	10.5	1792	7	97.81				1700	8.5
Sequence 24	295.3	>99.9	2.465	9.5511	0.668577	4.478	1.33988	0.3089	0.582713	0.3203	1735	9	1726.4	11	1708	11.5	97.8				2580	8
Sequence 146	665	>99.9	2.942	9.06618	0.543971	5.002	1.19952	0.3294	0.531269	0.53036	1835	8.5	1819.1	10.5	1803	8.5	97.8				1713	8
Sequence 121	402.8	>99.9	2.393	9.11577	0.546946	4.832	1.24172	0.323	0.588235	0.56188	1804	9	1790	11	1793	12	97.79				1697	10.5
Sequence 32	377.8	>99.9	2.79	9.32836	0.606343	4.708	2.54885	0.3142	2.38701	0.61791	1761	41	1768	30.5	1751	11.5	97.75				1464	15.5
Sequence 125	389.9	>99.9	1.421	7.98722	0.559105	6.249	1.2802	0.3686	0.637547	0.80668	2022	11	2014	11.5	2030	7.5	97.74				1717	18
Sequence 50	453	>99.9	1.777	9.41088	0.611707	4.485	1.22631	0.3073	0.536935	0.51165	1727.1	8	1728.3	10.5	1734	7	97.7				1449	15
Sequence 64	407	>99.9	1.986	9.56755	0.621891	4.416	1.24547	0.3067	0.57059	0.56114	1726	8.5	1714.5	10.5	1705	7.5	97.7				2483	13
Sequence 97	426	>99.9	3.055	9.37734	0.609527	4.502	1.22168	0.306	0.604575	0.66854	1721	9	1732.5	10.5	1742	7.5	97.66				1738	10.5
Sequence 40	183.7	>99.9	2.226	9.51746	0.666223	4.54	1.32159	0.311	0.530547	0.48994	1745.6	8	1737.2	10.5	1715	9	97.65				1685	10.5
Sequence 107	273	>99.9	3.178	9.14077	0.59415	4.808	1.24792	0.3188	0.53325	0.50549	1783.8	8.5	1785.1	11	1789	7.5	97.61				1723	9.5
Sequence 57	210	>99.9	1.084	10.8307	0.703997	3.311	1.344	0.2602	0.57648	0.55984	1492	8	1482.4	10.5	1471	10	97.58				1774	14.5
Sequence 105	381	>99.9	3.789	8.75657	0.61296	5.37	1.21043	0.3412	0.498242	0.26366	1892.2	8	1879.3	10.5	1864	9.5	97.57				1589	10.5
Sequence 20	275	>99.9	4.846	9.56846	0.62195	4.356	1.26263	0.302	0.57947	0.59405	1704	8.5	1703.8	10.5	1710	8	97.55				1844	16
Sequence 103	420	>99.9	2.996	9.24214	0.554529	4.95	1.21212	0.3281	0.548613	0.49875	1831	8.5	1810.3	10.5	1774	9.5	97.54				1728	11.5
Sequence 136	313	>99.9	3.299	9.10332	0.591716	4.936	1.21556	0.326	0.552147	0.42848	1818	9	1807.7	10.5	1796	7.5	97.49				1720	11
Sequence 81	316	>99.9	1.829	9.27644	0.649351	4.794	1.35586	0.3227	0.619771	0.52149	1803	10	1785	11	1760	11.5	97.43				1479	16
Sequence 27	277	>99.9	3.331	9.47867	0.663507	4.658	1.28811	0.316	0.585443	0.46839	1772	9	1759	11	1723	10.5	97.39				1657	9.5
Sequence 71	496.3	>99.9	2.812	9.42507	0.565504	4.707	1.2747	0.3185	0.565149	0.52202	1782	9	1768	10.5	1731	14.5	97.39				1722	17
Sequence 9	316	>99.9	1.578	8.78889	0.615222	5.394	1.29774	0.3436	0.56752	0.49785	1905	9.5	1883.9	11	1862	7.5	97.35				1914	10.5
Sequence 134	360	>99.9	1.67	9.4679	0.615414	4.519	1.32773	0.3104	0.579897	0.51766	1742	9	1735.3	10.5	1725	8	97.35				1695	17
Sequence 68	339	>99.9	1.397	9.59693	0.671785	4.456	1.23429	0.3097	0.565063	0.35963	1739	8.5	1723.9	10.5	1698	12	97.31				1733	13.5
Sequence 89	175.4	>99.9	2.757	9.44287	0.661001	4.535	1.32304	0.3094	0.597931	0.41895	1738	9	1736.2	11	1737	9	97.31				1741	12.5
Sequence 72	310.2	>99.9	1.639	9.67492	0.62887	4.315	1.27462	0.3027	0.594648	0.53334	1704	9	1696.2	10.5	1683	8	97.28				1721	12.5
Sequence 26	227	>99.9	1.468	10.0806	0.705645	3.916	1.27681	0.2844	0.59775	0.52527	1613	8.5	1615.7	10.5	1614	10	97.26				1700	16
Sequence 114	306	>99.9	2.406	9.09091	0.636364	4.923	1.32033	0.3254	0.553165	0.37002	1816	9	1806.3	11	1796	10	97.25				1690	13
Sequence 141	225.5	>99.9	2.635	9.3985	0.657895	4.678	1.2826	0.3172	0.598991	0.62605	1776	9	1764	10.5	1736	10.5	97.23				1660	11.5
Sequence 110	248.8	>99.9	1.583	9.56938	0.62201	4.555	1.31723	0.3128	0.607417	0.53299	1754	9.5	1740.5	10.5	1707	10	97.22				2467	6
Sequence 122	357	>99.9	2.082	9.63391	0.674374	4.361	1.26118	0.3053	0.589584	0.50742	1717	9	1705	10.5	1694	9	97.22				1726	14
Sequence 82	256	>99.9	2.982	9.4518	0.708885	4.466	1.23153	0.304	0.559211	0.21759	1711	8.5	1724	11	1726	14.5	97.2				1797	11
Sequence 58	243	>99.9	3.32	9.14913	0.686185	4.964	1.71233	0.329	0.942249	0.48578	1836	14.5	1812	14	1789	12.5	97.17				1691	12
Sequence 63	393	>99.9	9.59	5.12295	0.53791	14.55	1.27148	0.5408	0.58247	0.77637	2786	13	2785.5	12	2785.9	4.6	97.17				1749	11
Sequence 87	340	>99.9	2.17	8.86132	0.575986	5.36	1.30597	0.3428	0.583431	0.67716	1900	10	1877.8	11	1847	7.5	97.17				1694	14
Sequence 42	306	>99.9	2.53	10.7181	0.857449	3.277	1.38847	0.2546	0.569521	0.12059	1462	7.5	1475	10.5	1495	16.5	97.15				1764	11.5
Sequence 145	187.1	>99.9	2.87	9.44287	0.708215	4.653	1.28949	0.3174	0.598614	0.5408	1777	9.5	1757	11	1726	13.5	97.15				1705	10.5
Sequence 13	262	99.948	1.051	9.49668	0.664767	4.593	1.30634	0.314	0.573248	0.43951	1760	9	1748	11	1716	11	97.11				1694	14.5
Sequence 138	342	99.92	2.089	9.49217	0.616991	4.422	1.35685	0.3057	0.686948	0.84595	1719	10.5	1715	11.5	1718	8	97.11				1722	12.5
Sequence 66	350.3	>99.9	1.996	9.3985	0.704887	4.517	2.65663	0.3075	2.27642	0.8863	1728	35.5	1732	24	1740	9	97.08				1731	12
Sequence 117	518	>99.9	2.8	9.10664	0.591932	4.752	1.36785	0.3141	0.700414	0.80282	1760	11	1780	11	1795	7	97.08				1650	12
Sequence 41	159.7	>99.9	9.81	9.51475	0.666032	4.594	1.30605	0.3174	0.582861	0.47983	1777	9	1748.1	10.5	1717	9	97.07				1682	13
Sequence 79	111.2	99.862	1.367	5.97729	0.627615	11	1.27273	0.4796	0.615096	0.59877	2525	13	2526	12.5	2528	12.5	97.07				1722	15.5
Sequence 44	452	>99.9	1.85	9.41886	0.565131	4.471	1.34198	0.3051	0.819403	0.8456	1716	12.5	1724	11.5	1736	7	97.06				1761	14
Sequence 28	225.1	>99.9	5.74	9.53289	0.714967	4.617	1.29955	0.3135	0.606061	0.23828	1757	9	1753	11	1710	13.5	97				1790	13.5
Sequence 74	162.7	>99.9	2.062	9.28505	0.696379	4.72	1.37712	0.3185	0.596546	0.36898	1782	9	1769	11.5	1756	10.5	96.99				1712	14
Sequence 49	347.8	>99.9	3.06	9.45358	0.567215	4.385	1.25428	0.3022	0.727995	0.80851	1702	11	1708.4	11	1726	6.5	96.98				1780	14
Sequence 12	161.6	>99.9	2.057	9.25926	0.740741	4.774	1.46628	0.3228	0.650558	0.17035	1803	10	1779	12	1768	16	96.96				1713	14
Sequence 17	348	>99.9	1.717	9.10747	0.546448	4.89	1.32924	0.3231	0.88208	0.82066	1809	14	1799	11.5	1794	10.5	96.95				1695	13.5
Sequence 139	184	>99.9	1.327	9.51475	0.666032	4.448	1.34892	0.3092	0.614489	0.54731	1737	9.5	1722	11	1719	10	96.93				1700	14
Sequence 14	203	>99.9	1.904	9.37207	0.702905	4.64	1.2931	0.3147	0.587861	0.47442	1763	9	1756.3	11	1746	10.5	96.91				1728	14
Sequence 80	155.4	>99.9	1.283	9.86193	0.739645	4.238	1.41576	0.3033	0.576986	0.38681	1707	8.5	1685	11	1651	14	96.9				1691	16.5
Sequence 86	231	>99.9	2.03	9.58589	0.623083	4.384	1.36861	0.3054	0.654879	0.59327	1717	10	1708	11	1700	8.5	96.9				1777	13.5
Sequence 130	297.2	>99.9	1.419	5.80046	0.580046	11.93	1.25733	0.5003	0.589646	0.61592	2615	12.5	2598.7	11.5	2580	8	96.89				1492	14
Sequence 140	298	>99.9	1.521	9.52562	0.619166	4.488	1.22549	0.3099	0.596967	0.5283	1740	9	1728.9	10.5	1713	8	96.89				1718	15
Sequence 111	177.4	99.88	2.712	9.63391	0.722543	4.405	1.24858	0.307	0.570033	0.33425	1726	8.5	1713.1	11	1697	10.5	96.88				1711	16
Sequence 19	269	>99.9	0.916	10.8814	0.652884	3.035	1.81219	0.24	1.5	0.7686	1387	19.5	1415	16	1464	15.5	96.84				1722	15.5
Sequence 67	194	99.94	1.231	9.52381	0.666667	4.673	1.28397	0.321	0.623053	0.41125	1794	10	1761	10.5	1717	18	96.83				1720	16.5
Sequence 33	166.2	>99.9	1.14	10.9649	0.822368	3.253	1.36797	0.2576	0.601708	0.39429	1477	8	1471	11	1449	15	96.8				1696	15.5
Sequence 88	125.9	>99.9	2.434	6.16143	0.585336	10.9	1.2844	0.4831	0.56924	0.67909	2540	12	2512	12	2483	13	96.8				1778	10.5
Sequence 115	173.2	>99.9	1.829	9.38086	0.750469	4.577	1.3109	0.3104	0.64433	0.42568	1742	10	1743	11	1738	10.5	96.75				1417	17.5
Sequence 75	176.8	>99.9	2.313	9.68054	0.677638	4.366	1.37426	0.305	0.606557	0.49144	1716	9	1705	11	1685	10.5	96.73				1473	12.5
Sequence 100	211.3	>99.9	3.898	9.4697	0.662879	4.665	1.28617	0.3195	0.56338	0.3959	1788	9	1759.8	11	1723	9.5	96.73				1679	18.5
Sequence 48	198.9	>99.9	6.09	9.19963	0.689972	5.015	1.29611	0.3316	0.588058	0.43101	1846	9.5	1821	11	1774	14.5	96.72				1672	14.5
Sequence 25	212	99.9	2.168	10.1833	0.712831	3.999	1.37534	0.2952	0.592818	0.42799	1668	8.5	1634	11	1589	10.5	96.71				1620	22.5
Sequence 109	147.8	>99.9	0.868	8.84956	0.79646	5.31	1.31827	0.3402	0.587889	0.44487	1887	9.5	1878	12	1844	16	96.69				1660	22
Sequence 7	168.4	>99.9	1.308	9.44287	0.708215	4.571	1.31262	0.3127	0.559642	0.35469	1754	8.5	1745	11	1728	11.5	96.67				1445	19.5
Sequence 47	194.7	99.68	2.582	9.5057	0.760456	4.51	1.33038	0.3095	0.597738	0.32478	1739	9	1731.5	11	1720	11	96.62				1501.53	17.0362
Sequence 5	265.6	>99.9	0.931	10.8108	0.648649	2.998	1.83456	0.2367	1.56316	0.48097	1370	20	1406	16	1479	16	96.57				1502.26	6.18503
Sequence 4	250	>99.9	1.285	9.81354	0.686948	4.291	1.39828	0.3024	0.744048	0.72429	1702	11	1690	11.5	1657	9.5	96.56				1523.17	97.5652
Sequence 144	61.7	>99.9	1.17	9.49668	0.902184	4.44	1.46396	0.3094	0.727214	0.61569	1740	11.5	1718	12.5	1722	17	96.56				1540.41	15.6435
Sequence 21	127	>99.9	2.347	8.51789	0.72402	5.696	1.31671	0.3506	0.656018	0.50797	1937	11	1929	11.5	1914	10.5	96.52				1546.06	10.328
Sequence 54	153.2	>99.9	1.59	9.63391	1.34875	4.345	3.45224	0.3019	1.65618	0.39986	1700	24	1701	22.5	1695	17	96.49				1552.04	16.6268
Sequence 10	114.4	>99.9	2.741	9.43396	0.849057	4.58	1.41921	0.3121	0.608779	0.46094	1752	9.5	1746	11.5	1733	13.5	96.48				1556.29	11.3047
Sequence 55	174.8	>99.9	3.213	9.3633	0.749064	4.525	1.43646	0.3085	0.810373	0.34344	1733	12.5	1735	12.5	1741	12.5	96.47				1566.05	11.2626
Sequence 65	245	>99.9	4.69	9.4697	0.757576	4.455	1.57127	0.3057	1.07949	0.5823	1719	16.5	1721	14.5	1721	12.5	96.47				1574.17	20.1218
Sequence 76	241	>99.9	2.653	9.63391	0.722543	4.601	1.30406	0.3178	0.59786	0.33592	1779	9.5	1749	11	1700	16	96.46				1586.85	60.2106
Sequence 90	74.3	99.89	2.771	9.68054	0.871249	4.208	1.54468	0.2939	0.697516	0.54453	1662	10.5	1674	12.5	1690	13	96.45				1593.23	15.1305
Sequence 99	174	>99.9	0.884	9.79432	0.734574	4.228	1.30085	0.3003	0.632701	0.37588	1692	9.5	1678	11	1660	11.5	96.45				1593.73	12.59
Sequence 30	412	>99.9	2.045	6.21118	0.559006	10.63	1.31703	0.4751	0.747211	0.82803	2505	15.5	2491	12.5	2467	6	96.41				1600.32	10.3993
Sequence 3	294	99.51	2.338	9.44287	0.897073	4.187	1.67184	0.2873	0.730943	0.39242	1628	10.5	1672	12.5	1726	14	96.39				1603.56	14.1597
Sequence 39	429	>99.9	1.051	9.09091	0.590909	4.722	1.27065	0.3124	0.896287	0.65252	1752	14	1770	11.5	1797	11	96.38				1605.05	14.3176
Sequence 56	118.3	>99.9	2.539	9.63391	0.770713	4.473	1.34138	0.3132	0.590677	0.39711	1756	9.5	1724	11	1691	12	96.37				1622.52	15.5203
Sequence 132	212	>99.9	1.603	9.37207	0.702905	4.779	1.25549	0.3209	0.623247	0.22758	1794	9.5	1780	11	1749	11	96.37				1634.64	47.5375
Sequence 29	86.8	>99.9	1.973	9.6432	0.916104	4.428	1.46793	0.308	0.665584	0.46569	1731	10	1721	12	1694	14	96.34				1637.85	21.5991
Sequence 137	357	99.78	3.612	9.25926	0.601852	4.351	2.18341	0.2986	2.00938	0.79336	1683	31.5	1702	22.5	1764	11.5	96.34				1638.83	23.6668
Sequence 36	468	>99.9	1.713	9.59693	0.575816	4.171	1.31863	0.2919	0.80507	0.77949	1650	12	1670	11	1705	10.5	96.3				1641.24	15.815
Sequence 119	124	>99.9	2.606	9.61538	0.817308	4.428	1.35501	0.3091	0.64704	0.34522	1736	10	1718	11.5	1694	14.5	96.23				1645.09	10.4086
Sequence 93	130.7	>99.9	2.283	9.47867	0.805687	4.505	1.33185	0.3111	0.610736	0.34602	1746	9.5	1734	11.5	1722	12.5	96.18				1645.51	9.80051
Sequence 143	125.6	99.78	2.029	9.42507	0.801131	4.532	1.32392	0.309	0.614887	0.33211	1737	9.5	1737	11.5	1731	12	96.16				1646.41	13.4155
Sequence 102	95.7	>99.9	0.761	9.83284	0.786627	4.154	1.44439	0.2953	0.694209	0.41505	1669	10	1666	11.5	1650	12	96.13				1646.44	12.0309
Sequence 108	166.1	>99.9	1.623	9.69932	0.775946	4.365	1.37457	0.3068	0.65189	0.48444	1727	10	1704	11.5	1682	13	96.13				1647.76	14.5342
Sequence 131	312	99.89	1.464	9.5057	0.712928	4.524	1.43678	0.312	0.721154	0.55952	1757	11	1736	11.5	1722	15.5	96.12				1648.11	21.0873
Sequence 35	108.9	>99.9	1.884	9.31966	0.885368	4.691	1.38563	0.318	0.628931	0.30573	1779	10	1766	12	1761	14	96.04				1648.26	15.0345
Sequence 62	76.5	>99.9	3.213	9.13242	0.821918	4.92	1.42276	0.3258	0.675261	0.28735	1818	10.5	1806	12	1790	13.5	96.03				1649.19	11.0264
Sequence 98	102.6	>99.9	1.89	9.58773	0.862895	4.434	1.35318	0.3078	0.649773	0.41365	1731	9.5	1716	11.5	1712	14	96.02				1649.74	17.6532
Sequence 124	426	>99.9	2.481	9.1659	0.641613	4.695	1.27796	0.3105	0.740741	0.44218	1742	11.5	1765	11.5	1780	14	96.02				1649.95	9.83545
Sequence 52	129	>99.9	2.05	9.53289	0.810296	4.427	1.35532	0.3029	0.676791	0.35728	1705	10	1716	11.5	1713	14	95.93				1650.58	24.5898
Sequence 106	109.5	99.51	1.557	9.59693	0.863724	4.143	1.44823	0.2857	0.59503	0.45661	1619	8.5	1664	12	1695	13.5	95.93				1650.89	18.2941
Sequence 6	332.1	99.91	1.44	9.58773	0.71908	4.2	1.90476	0.2923	1.71057	0.88572	1651	26	1679	18.5	1700	14	95.8				1651.11	10.9069
Sequence 123	107.1	>99.9	2.093	9.44287	0.849858	4.509	1.44156	0.307	0.667752	0.46778	1725	10	1731	12	1728	14	95.79				1651.39	22.7936
Sequence 18	76.9	>99.9	0.89	9.59693	0.959693	4.455	1.45903	0.3105	0.660225	0.29927	1745	10	1722	12	1691	16.5	95.78				1651.79	12.096
Sequence 70	112.7	99.92	2.407	9.19963	0.827967	4.676	1.39008	0.3116	0.609756	0.22452	1748	9.5	1761	11.5	1777	13.5	95.76				1653.37	8.06988
Sequence 133	168.8	>99.9	0.797	10.7527	0.806452	3.3	1.37879	0.2589	0.695249	0.34926	1484	9	1483	11	1492	14	95.76				1653.89	12.8012
Sequence 73	105.3	>99.9	1.511	9.47867	0.947867	4.46	1.4574	0.308	0.681818	0.43036	1731	10	1721	12	1718	15	95.6				1654.18	14.9744
Sequence 51	75.5	>99.9	2.197	9.49668	0.949668	4.427	1.46826	0.3048	0.672572	0.34609	1715	10	1716	12.5	1711	16	95.57				1654.49	19.8121
Sequence 22	54.3	>99.9	1.914	9.48767	0.996205	4.535	1.54355	0.3102	0.660864	0.34717	1741	10	1737	12.5	1722	15.5	95.54				1654.76	24.6073
Sequence 118	180	>99.9	1.985	9.48767	1.94497	4.46	2.13004	0.305	2.13115	0.85022	1715	33.5	1721	21.5	1720	16.5	95.49				1655.71	18.9061
Sequence 60	78.1	>99.9	1.375	9.56938	0.956938	4.418	1.47125	0.3036	0.658762	0.35141	1711	10	1714	12	1696	15.5	95.36				1656.28	6.63117
Sequence 129	230	99.85	3.187	9.2081	0.736648	4.71	1.59236	0.3183	1.00534	0.80228	1783	15.5	1768	13	1778	10.5	95.29				1656.63	22.0845
Sequence 148	67.7	99.66	1.157	11.1483	1.00334	3.249	1.47738	0.2589	0.656624	0.078424	1484	8.5	1471	11.5	1417	17.5	95.17				1656.73	16.4173
Sequence 91	184	>99.9	1.585	10.8225	0.811688	3.168	1.57828	0.2533	1.08567	0.82299	1454	14.5	1447	13	1473	12.5	95.14				1656.88	21.4629
Sequence 37	60.1	99.83	1.873	9.67118	1.01547	4.384	1.48266	0.3082	0.665152	0.30025	1731	10	1710	12.5	1679	18.5	95.11				1657.89	21.5491
Sequence 59	171.6	>99.9	2.424	9.71817	0.728863	3.734	1.33905	0.2649	0.736127	0.54472	1514	10	1579	11.5	1672	14.5	94.98				1658.05	20.6252
Sequence 147	81	>99.9	1.076	10	0.95	4.097	1.70857	0.2968	0.943396	0.37298	1675	13.5	1657	13	1620	22.5	94.98				1658.64	13.1772
Sequence 43	50.6	99.84	0.8047	9.82318	1.12967	4.28	1.63551	0.303	0.693069	0.34764	1706	10.5	1689	13.5	1660	22	94.95				1659.77	7.98438
Sequence 83	74	99.69	1.464	10.917	1.0917	3.237	1.54464	0.2572	0.699844	0.33197	1475	9	1466	12	1445	19.5	94.86				1659.87	19.8122
																					1661.03	22.0163
Doe et al 2013																					1662.36	21.1789
Table SD 1. U-Pb geochronologic analyses, University of Arizona Laserchron Center																					1663.23	19.3835
								Isotope ratios						Apparent ages (Ma)							1663.84	30.1586
Analysis	Date	U [ppm]	206Pb/204Pb	U/Th	206Pb/207Pb*	(%)±	207Pb/235U*	(%)±	206Pb/238U*	(%)±	error corr.	206Pb/238U*	(Ma)±	207Pb/235U*	(Ma)±	206Pb/207Pb*	(Ma)±	Best age (Ma)	(Ma)±	Conc. (%)	1665.1	20.6214
Sampe BD/BC-10-4: Defiance quartzite, Arizona (UTM, 12S, E 670981, N 3962039, NAD27)																					1665.15	9.91896
BD/BC-10-4-52	2011-05-15	95.4697	109004	1.62214	10.6753	0.901268	3.50228	1.69452	0.271163	1.43497	0.846826	1546.7	19.7329	1527.73	13.3851	1501.53	17.0362	1501.53	17.0362	103.008	1666.1	14.2326
BD/BC-10-4-55	2011-05-15	257.058	224781	1.59237	10.6712	0.327214	3.46504	1.28822	0.268178	1.24597	0.967203	1531.55	16.9851	1519.3	10.1512	1502.26	6.18503	1502.26	6.18503	101.95	1667.37	17.5296
BD/BC-10-4-27	2011-05-15	56.5969	867.412	2.21921	10.5536	5.17278	2.91456	10.613	0.223086	9.26704	0.873178	1298.16	108.972	1385.7	80.4016	1523.17	97.5652	1523.17	97.5652	85.2275	1668.3	32.7425
BD/BC-10-4-105	2011-05-15	112.782	112654	1.43451	10.4575	0.831789	3.59182	1.57854	0.27242	1.34161	0.849905	1553.08	18.5163	1547.73	12.5383	1540.41	15.6435	1540.41	15.6435	100.822	1669.23	18.683
BD/BC-10-4-51	2011-05-15	150.511	253587	1.63803	10.426	0.549572	3.6547	1.02707	0.276356	0.867668	0.844798	1572.99	12.1107	1561.53	8.18842	1546.06	10.328	1546.06	10.328	101.741	1671.14	26.1861
BD/BC-10-4-1	2011-05-15	133.303	82266.6	0.733349	10.393	0.885425	3.64884	2.19199	0.275038	2.0052	0.914787	1566.33	27.8836	1560.26	17.4711	1552.04	16.6268	1552.04	16.6268	100.921	1672.75	12.4253
BD/BC-10-4-88	2011-05-15	194.554	235135	0.905215	10.3694	0.602351	3.61866	2.05	0.272146	1.95951	0.955858	1551.68	27.023	1553.64	16.31	1556.29	11.3047	1556.29	11.3047	99.7039	1673.07	20.3606
BD/BC-10-4-11	2011-05-15	90.7545	33096.2	1.26627	10.3156	0.600962	3.68136	1.54163	0.275424	1.41968	0.92089	1568.27	19.7631	1567.33	12.3103	1566.05	11.2626	1566.05	11.2626	100.142	1680.38	11.4361
BD/BC-10-4-77	2011-05-15	105.683	85653.9	0.998007	10.271	1.07474	3.73647	1.9797	0.278337	1.66258	0.839811	1582.98	23.3361	1579.22	15.8589	1574.17	20.1218	1574.17	20.1218	100.56	1681.83	11.0519
BD/BC-10-4-8	2011-05-15	23.2055	27546.5	2.57056	10.2016	3.22044	3.87389	4.38901	0.286625	2.98198	0.679419	1624.64	42.8244	1608.26	35.436	1586.85	60.2106	1586.85	60.2106	102.381	1682.17	19.6446
BD/BC-10-4-23	2011-05-15	79.6527	81803.4	1.32146	10.1668	0.810097	3.77522	1.53737	0.278372	1.30662	0.849905	1583.16	18.3416	1587.49	12.3418	1593.23	15.1305	1593.23	15.1305	99.3678	1683.29	15.788
BD/BC-10-4-85	2011-05-15	194.947	216101	1.88922	10.1641	0.674127	3.88234	1.48846	0.286194	1.32705	0.89156	1622.48	19.0353	1610.02	12.0185	1593.73	12.59	1593.73	12.59	101.804	1683.5	12.7588
BD/BC-10-4-76	2011-05-15	146.732	141753	1.07713	10.1283	0.557307	3.82435	1.83951	0.280926	1.75305	0.953002	1596.03	24.7847	1597.88	14.8075	1600.32	10.3993	1600.32	10.3993	99.7317	1683.54	11.0641
BD/BC-10-4-19	2011-05-15	105.172	12264.9	1.63653	10.1107	0.759142	3.81993	1.48412	0.280115	1.27527	0.859278	1591.94	17.9891	1596.95	11.9436	1603.56	14.1597	1603.56	14.1597	99.2757	1685.07	11.0543
BD/BC-10-4-44	2011-05-15	86.6322	87505.1	1.221	10.1026	0.767758	4.01047	1.45787	0.293852	1.23932	0.850094	1660.75	18.1446	1636.32	11.8491	1605.05	14.3176	1605.05	14.3176	103.471	1688.46	19.6764
BD/BC-10-4-68	2011-05-15	116.072	67885.9	1.53589	10.0083	0.834218	4.03834	2.11249	0.293131	1.9408	0.918725	1657.16	28.361	1641.95	17.1942	1622.52	15.5203	1622.52	15.5203	102.135	1692.23	60.26
BD/BC-10-4-40	2011-05-15	177.273	9871.71	1.03161	9.94326	2.55867	3.04089	6.68259	0.219295	6.17335	0.923796	1278.15	71.5776	1417.95	51.1052	1634.64	47.5375	1634.64	47.5375	78.1913	1698.26	15.0119
BD/BC-10-4-93	2011-05-15	101.669	122073	2.37948	9.92611	1.16319	4.06038	1.90253	0.292311	1.50552	0.791327	1653.07	21.9525	1646.38	15.5017	1637.85	21.5991	1637.85	21.5991	100.929	1699.13	21.1827
BD/BC-10-4-57	2011-05-15	55.5476	46730.3	1.81428	9.92086	1.27469	4.13089	1.87238	0.29723	1.37149	0.732482	1677.56	20.2575	1660.44	15.3076	1638.83	23.6668	1638.83	23.6668	102.363	1701.09	17.3525
BD/BC-10-4-13	2011-05-15	99.0356	107354	1.45588	9.90801	0.852014	4.13003	1.30623	0.296783	0.990104	0.757987	1675.33	14.6073	1660.26	10.6782	1641.24	15.815	1641.24	15.815	102.077	1703.17	15.4187
BD/BC-10-4-87	2011-05-15	179.956	418991	2.20444	9.88745	0.561039	4.10269	1.15082	0.294206	1.0048	0.873116	1662.51	14.7247	1654.84	9.39549	1645.09	10.4086	1645.09	10.4086	101.059	1707.51	17.5723
BD/BC-10-4-42	2011-05-15	82.8526	60923.8	1.50675	9.88521	0.528289	4.16537	1.30197	0.298633	1.18997	0.913979	1684.53	17.6404	1667.24	10.661	1645.51	9.80051	1645.51	9.80051	102.371	1707.89	13.1205
BD/BC-10-4-30	2011-05-15	105.984	55931.5	2.09652	9.88041	0.723233	4.133	1.42089	0.296169	1.22305	0.860767	1672.28	18.0154	1660.85	11.6173	1646.41	13.4155	1646.41	13.4155	101.571	1708.15	9.37824
BD/BC-10-4-35	2011-05-15	107.709	131653	1.72686	9.88024	0.64859	4.13197	1.74922	0.29609	1.62454	0.928718	1671.89	23.9242	1660.65	14.3014	1646.44	12.0309	1646.44	12.0309	101.545	1710.72	15.7059
BD/BC-10-4-92	2011-05-15	150.205	168400	1.59781	9.87321	0.783672	4.09899	2.02859	0.293518	1.8711	0.922367	1659.08	27.3703	1654.1	16.5598	1647.76	14.5342	1647.76	14.5342	100.687	1713.9	27.0155
BD/BC-10-4-15	2011-05-15	88.0797	66561.4	1.25985	9.87137	1.13713	4.1497	2.42662	0.297093	2.14369	0.883407	1676.88	31.6524	1664.15	19.8574	1648.11	21.0873	1648.11	21.0873	101.745	1720.24	12.8452
BD/BC-10-4-9	2011-05-15	113.264	103168	2.91951	9.87057	0.810795	4.17401	1.53615	0.298809	1.30474	0.849362	1685.4	19.3506	1668.93	12.5838	1648.26	15.0345	1648.26	15.0345	102.253	1723.88	6.80864
BD/BC-10-4-32	2011-05-15	183.26	118182	1.648	9.86561	0.594652	4.16991	2.07993	0.298366	1.99311	0.958259	1683.2	29.526	1668.13	17.0358	1649.19	11.0264	1649.19	11.0264	102.062	1728.65	9.81747
BD/BC-10-4-94	2011-05-15	72.0119	102539	1.60386	9.86271	0.952176	4.09263	1.95102	0.29275	1.70289	0.872821	1655.26	24.8593	1652.83	15.9216	1649.74	17.6532	1649.74	17.6532	100.335	1737.46	9.72125
BD/BC-10-4-5	2011-05-15	155.245	214955	1.33272	9.8616	0.530474	4.21064	1.17175	0.301158	1.04479	0.891652	1697.05	15.5888	1676.1	9.61465	1649.95	9.83545	1649.95	9.83545	102.855	1737.85	88.5251
BD/BC-10-4-66	2011-05-15	85.1458	199882	1.68203	9.85826	1.32639	4.02071	2.04094	0.287476	1.55116	0.760025	1628.91	22.3275	1638.39	16.5972	1650.58	24.5898	1650.58	24.5898	98.6872	1740.13	6.65207
BD/BC-10-4-86	2011-05-15	70.5528	62339.3	1.62848	9.85658	0.98688	4.15982	1.99885	0.297372	1.73823	0.869618	1678.26	25.6841	1666.14	16.3639	1650.89	18.2941	1650.89	18.2941	101.658	1777.8	9.06015
BD/BC-10-4-7	2011-05-15	142.01	81513.2	1.49553	9.85544	0.588351	4.2071	0.915713	0.300717	0.701694	0.766281	1694.86	10.4578	1675.41	7.5125	1651.11	10.9069	1651.11	10.9069	102.65	1788.91	13.7299
BD/BC-10-4-4	2011-05-15	105.7	70207.7	1.80006	9.85393	1.22965	4.13287	1.96654	0.295365	1.53468	0.780397	1668.29	22.5583	1660.83	16.0791	1651.39	22.7936	1651.39	22.7936	101.023	1892.47	33.2601
BD/BC-10-4-17	2011-05-15	107.169	45278.3	0.957396	9.85181	0.65264	4.08777	1.59978	0.292079	1.46061	0.913002	1651.91	21.2846	1651.86	13.0519	1651.79	12.096	1651.79	12.096	100.007	2495.2	4.9072
BD/BC-10-4-104	2011-05-15	204.138	442698	1.37112	9.84341	0.43544	4.11057	1.53201	0.293458	1.46883	0.958757	1658.79	21.4825	1656.41	12.5126	1653.37	8.06988	1653.37	8.06988	100.328	2516.53	3.01573
BD/BC-10-4-22	2011-05-15	102.876	128593	1.77518	9.84065	0.690868	4.13563	3.12595	0.295165	3.04865	0.975271	1667.29	44.789	1661.37	25.5653	1653.89	12.8012	1653.89	12.8012	100.81	2559.41	2.7877
BD/BC-10-4-29	2011-05-15	124.243	126669	1.55296	9.83912	0.808161	4.06259	1.41028	0.289907	1.15575	0.819519	1641.06	16.7449	1646.83	11.4917	1654.18	14.9744	1654.18	14.9744	99.2071	2620.42	35.1546
BD/BC-10-4-20	2011-05-15	112.707	91235	1.26176	9.83744	1.06925	4.14743	2.40622	0.29591	2.1556	0.895844	1671	31.7303	1663.7	19.6883	1654.49	19.8121	1654.49	19.8121	100.997	2810.41	3.25091
BD/BC-10-4-50	2011-05-15	89.0226	97128.9	1.67449	9.83603	1.32805	4.3355	1.79932	0.309284	1.21403	0.674713	1737.18	18.4872	1700.14	14.8469	1654.76	24.6073	1654.76	24.6073	104.981	1460.28	11.9765
BD/BC-10-4-74	2011-05-15	82.9887	66173	1.48755	9.83097	1.02052	4.09252	1.63053	0.291801	1.27168	0.779916	1650.52	18.5177	1652.81	13.3058	1655.71	18.9061	1655.71	18.9061	99.6864	1468.98	15.6369
BD/BC-10-4-83	2011-05-15	168.767	165810	1.29063	9.82797	0.357944	4.13329	1.65538	0.294617	1.61622	0.976342	1664.56	23.7103	1660.91	13.5349	1656.28	6.63117	1656.28	6.63117	100.5	1472.72	11.6563
BD/BC-10-4-21	2011-05-15	83.762	101686	1.7765	9.8261	1.1922	4.15807	1.83879	0.296327	1.39994	0.761335	1673.07	20.6294	1665.8	15.0522	1656.63	22.0845	1656.63	22.0845	100.992	1474.3	23.7942
BD/BC-10-4-64	2011-05-15	96.8341	93218.2	1.78322	9.82558	0.886312	4.02892	1.76964	0.287108	1.53169	0.865538	1627.06	22.0253	1640.05	14.3965	1656.73	16.4173	1656.73	16.4173	98.2093	1484.72	13.4676
BD/BC-10-4-63	2011-05-15	54.2132	47989.3	1.42181	9.82476	1.15868	4.03227	1.94955	0.287323	1.56787	0.804219	1628.14	22.5586	1640.73	15.863	1656.88	21.4629	1656.88	21.4629	98.2651	1499.02	13.8105
BD/BC-10-4-61	2011-05-15	87.4426	106038	1.55388	9.81945	1.16349	4.05429	1.7084	0.288736	1.25097	0.732247	1635.21	18.0677	1645.16	13.9156	1657.89	21.5491	1657.89	21.5491	98.6321	1532.36	54.7993
BD/BC-10-4-24	2011-05-15	80.5193	77251.1	1.36535	9.81857	1.11363	4.1643	1.50572	0.296544	1.01341	0.673044	1674.15	14.942	1667.03	12.3289	1658.05	20.6252	1658.05	20.6252	100.971	1533.13	25.4708
BD/BC-10-4-69	2011-05-15	93.2985	124487	1.3874	9.81547	0.711589	4.13549	1.40371	0.294399	1.20998	0.861984	1663.48	17.7404	1661.34	11.4781	1658.64	13.1772	1658.64	13.1772	100.292	1543.42	105.229
BD/BC-10-4-72	2011-05-15	199.994	134037	1.68978	9.80944	0.431271	4.09605	1.30981	0.291412	1.23677	0.944238	1648.58	17.9909	1653.52	10.6902	1659.77	7.98438	1659.77	7.98438	99.3258	1550.75	72.0539
BD/BC-10-4-10	2011-05-15	63.7272	60087.8	1.76282	9.80892	1.06999	4.1879	2.29883	0.297931	2.03463	0.885074	1681.04	30.1073	1671.65	18.8448	1659.87	19.8122	1659.87	19.8122	101.275	1551.7	16.6456
BD/BC-10-4-71	2011-05-15	99.109	148316	1.38186	9.80276	1.18919	4.07763	2.15224	0.289905	1.79387	0.83349	1641.05	25.9902	1649.84	17.5514	1661.03	22.0163	1661.03	22.0163	98.797	1563.27	26.547
BD/BC-10-4-38	2011-05-15	113.996	127823	1.94463	9.79575	1.14416	4.15015	1.58537	0.29485	1.0974	0.692208	1665.72	16.1089	1664.24	12.9726	1662.36	21.1789	1662.36	21.1789	100.202	1568.75	13.3404
BD/BC-10-4-65	2011-05-15	85.4996	47038	1.46996	9.7911	1.04729	4.06036	1.4441	0.288334	0.99429	0.688517	1633.2	14.3449	1646.38	11.766	1663.23	19.3835	1663.23	19.3835	98.194	1571.01	25.8167
BD/BC-10-4-60	2011-05-15	74.6078	55350.7	1.51591	9.78791	1.62948	4.25214	2.06007	0.301854	1.26043	0.611837	1700.49	18.8396	1684.15	16.9365	1663.84	30.1586	1663.84	30.1586	102.203	1584.54	45.982
BD/BC-10-4-45	2011-05-15	63.1274	62137.3	1.70833	9.78124	1.11443	4.25148	1.9537	0.301601	1.60467	0.821352	1699.24	23.9697	1684.02	16.0613	1665.1	20.6214	1665.1	20.6214	102.05	1590.91	34.8587
BD/BC-10-4-25	2011-05-15	85.4136	111836	1.24696	9.78096	0.536109	4.16678	0.976125	0.295584	0.815725	0.835677	1669.37	11.9971	1667.51	7.99328	1665.15	9.91896	1665.15	9.91896	100.253	1596.99	34.9098
BD/BC-10-4-6	2011-05-15	81.6006	76039.3	1.02493	9.77595	0.769307	4.17527	1.11981	0.296035	0.81372	0.726659	1671.61	11.9817	1669.18	9.17355	1666.1	14.2326	1666.1	14.2326	100.331	1601.07	21.7426
BD/BC-10-4-54	2011-05-15	102.632	118202	1.9004	9.76925	0.947641	4.16348	1.39356	0.294996	1.02176	0.733198	1666.45	15.0042	1666.86	11.41	1667.37	17.5296	1667.37	17.5296	99.9447	1604.38	32.3606
BD/BC-10-4-37	2011-05-15	62.4882	6062.62	1.53513	9.76433	1.77007	4.23263	2.16222	0.299745	1.24179	0.574314	1690.04	18.4613	1680.37	17.7609	1668.3	32.7425	1668.3	32.7425	101.303	1607.16	12.5892
BD/BC-10-4-82	2011-05-15	155.263	137440	1.0958	9.75941	1.01022	4.12948	1.64885	0.292292	1.30314	0.79033	1652.98	19.0006	1660.16	13.4791	1669.23	18.683	1669.23	18.683	99.0261	1630.78	25.6691
BD/BC-10-4-101	2011-05-15	52.1376	67825.8	1.36404	9.74937	1.4162	4.27958	2.56753	0.302605	2.14163	0.834121	1704.21	32.0723	1689.44	21.1354	1671.14	26.1861	1671.14	26.1861	101.979	1634.02	6.2811
BD/BC-10-4-80	2011-05-15	107.227	161579	1.93075	9.74085	0.672197	4.16968	1.75091	0.294576	1.61674	0.923369	1664.36	23.7154	1668.08	14.3404	1672.75	12.4253	1672.75	12.4253	99.498	1634.93	23.8522
BD/BC-10-4-99	2011-05-15	121.366	91964.2	2.36878	9.73917	1.10146	4.23184	1.7045	0.298917	1.30081	0.763163	1685.93	19.2976	1680.22	14	1673.07	20.3606	1673.07	20.3606	100.769	1635.48	16.3823
BD/BC-10-4-41	2011-05-15	122.132	140433	1.64821	9.70072	0.619203	4.27801	1.04631	0.300985	0.843415	0.806086	1696.19	12.5786	1689.14	8.61136	1680.38	11.4361	1680.38	11.4361	100.941	1636.41	21.1959
BD/BC-10-4-47	2011-05-15	77.9946	94723.9	0.954819	9.69314	0.598509	4.17349	2.25958	0.293402	2.17887	0.964282	1658.51	31.8627	1668.83	18.5106	1681.83	11.0519	1681.83	11.0519	98.6134	1641.09	14.0567
BD/BC-10-4-84	2011-05-15	94.7117	212995	1.65849	9.69131	1.06396	4.32088	2.30735	0.303706	2.0474	0.887338	1709.66	30.7466	1697.35	19.0275	1682.17	19.6446	1682.17	19.6446	101.634	1643.62	13.332
BD/BC-10-4-49	2011-05-15	100.216	156609	1.72215	9.68547	0.85514	4.38332	1.40008	0.307909	1.10859	0.791802	1730.41	16.8242	1709.2	11.5759	1683.29	15.788	1683.29	15.788	102.8	1644.09	9.29813
BD/BC-10-4-91	2011-05-15	149.664	36159.2	1.46187	9.68434	0.691091	3.90797	4.65525	0.274486	4.60367	0.988919	1563.53	63.9178	1615.33	37.6549	1683.5	12.7588	1683.5	12.7588	92.8737	1644.89	18.5187
BD/BC-10-4-2	2011-05-15	90.5585	69541.1	1.68649	9.68411	0.599299	4.34277	1.73407	0.305018	1.62722	0.938381	1716.14	24.5174	1701.52	14.3128	1683.54	11.0641	1683.54	11.0641	101.936	1645.1	18.1513
BD/BC-10-4-31	2011-05-15	112.299	148272	2.29059	9.67614	0.598886	4.37954	1.02897	0.307347	0.836725	0.81317	1727.64	12.6806	1708.49	8.50599	1685.07	11.0543	1685.07	11.0543	102.526	1646.17	16.8799
BD/BC-10-4-70	2011-05-15	140.632	122248	2.18203	9.65834	1.06653	4.19464	3.00255	0.29383	2.80674	0.934787	1660.64	41.0909	1672.97	24.6232	1688.46	19.6764	1688.46	19.6764	98.3521	1646.63	13.7331
BD/BC-10-4-78	2011-05-15	53.2564	6091.41	1.55089	9.63866	3.26707	4.11201	3.5762	0.287455	1.45447	0.406708	1628.8	20.9345	1656.69	29.2169	1692.23	60.26	1692.23	60.26	96.2517	1646.73	12.3045
BD/BC-10-4-67	2011-05-15	79.5788	49515.8	2.17323	9.60717	0.814744	4.26158	1.65557	0.296937	1.44122	0.870526	1676.1	21.2713	1685.97	13.6163	1698.26	15.0119	1698.26	15.0119	98.6954	1646.8	14.0205
BD/BC-10-4-95	2011-05-15	89.2845	107875	1.20944	9.60261	1.14972	4.3499	2.43646	0.302948	2.14813	0.881662	1705.91	32.1976	1702.88	20.1177	1699.13	21.1827	1699.13	21.1827	100.399	1648.23	15.7612
BD/BC-10-4-100	2011-05-15	83.9006	88976.5	1.77499	9.59239	0.942092	4.33603	1.47122	0.30166	1.13002	0.768086	1699.54	16.8821	1700.24	12.1395	1701.09	17.3525	1701.09	17.3525	99.9084	1649.02	7.1973
BD/BC-10-4-98	2011-05-15	97.28	79744.5	1.43846	9.58159	0.837334	4.36164	1.40716	0.3031	1.13091	0.803686	1706.66	16.9573	1705.1	11.6237	1703.17	15.4187	1703.17	15.4187	100.205	1649.65	29.112
BD/BC-10-4-56	2011-05-15	88.9005	151619	1.22654	9.55901	0.954797	4.39368	2.89606	0.304607	2.73414	0.94409	1714.12	41.1534	1711.15	23.9586	1707.51	17.5723	1707.51	17.5723	100.387	1649.76	9.67806
BD/BC-10-4-43	2011-05-15	106.801	181705	2.43906	9.55704	0.712969	4.4655	1.24665	0.309523	1.02265	0.820317	1738.36	15.582	1724.58	10.3426	1707.89	13.1205	1707.89	13.1205	101.784	1650.07	11.8607
BD/BC-10-4-90	2011-05-15	108.489	141797	0.68243	9.55566	0.509662	4.39511	1.55711	0.304599	1.47134	0.944916	1714.08	22.1454	1711.42	12.8808	1708.15	9.37824	1708.15	9.37824	100.347	1650.19	19.8574
BD/BC-10-4-59	2011-05-15	95.2646	146419	1.41572	9.54237	0.853742	4.46681	1.39988	0.309138	1.10941	0.792504	1736.46	16.888	1724.83	11.6146	1710.72	15.7059	1710.72	15.7059	101.505	1650.25	9.89263
BD/BC-10-4-39	2011-05-15	104.465	44293.5	0.402649	9.52586	1.46898	4.4854	4.29175	0.309887	4.03252	0.939598	1740.15	61.5004	1728.27	35.6481	1713.9	27.0155	1713.9	27.0155	101.532	1651.51	13.2859
BD/BC-10-4-48	2011-05-15	154.943	88723.9	2.4602	9.49305	0.699002	4.48326	1.14248	0.308673	0.903696	0.790992	1734.17	13.7407	1727.88	9.48523	1720.24	12.8452	1720.24	12.8452	100.81	1651.94	30.8806
BD/BC-10-4-26	2011-05-15	165.061	154552	1.8255	9.47428	0.370682	4.40796	2.49842	0.302888	2.47077	0.988932	1705.62	37.028	1713.84	20.6804	1723.88	6.80864	1723.88	6.80864	98.9405	1653.47	35.9296
BD/BC-10-4-58	2011-05-15	154.107	287186	1.76719	9.44968	0.534811	4.57793	1.25173	0.313751	1.13173	0.90413	1759.14	17.4234	1745.26	10.4316	1728.65	9.81747	1728.65	9.81747	101.763	1653.88	28.3813
BD/BC-10-4-12	2011-05-15	175.227	270304	2.40535	9.40444	0.53025	4.64775	1.25651	0.317011	1.13914	0.906595	1775.12	17.676	1757.89	10.4997	1737.46	9.72125	1737.46	9.72125	102.167	1654.99	16.6939
BD/BC-10-4-89	2011-05-15	69.1012	32293.4	1.66891	9.40246	4.82562	4.21763	4.98884	0.287613	1.26568	0.253701	1629.59	18.2249	1677.46	40.9695	1737.85	88.5251	1737.85	88.5251	93.7707	1655.13	15.8603
BD/BC-10-4-62	2011-05-15	167.041	142048	1.70422	9.39076	0.362993	4.4802	2.01286	0.305139	1.97986	0.983605	1716.74	29.8398	1727.31	16.7103	1740.13	6.65207	1740.13	6.65207	98.656	1655.29	12.4404
BD/BC-10-4-14	2011-05-15	133.539	208790	2.16483	9.19928	0.496683	4.77901	1.01684	0.318853	0.887279	0.872587	1784.12	13.8284	1781.22	8.53839	1777.8	9.06015	1777.8	9.06015	100.356	1655.43	11.3957
BD/BC-10-4-79	2011-05-15	122.722	212307	2.28438	9.14337	0.753652	4.81469	1.63892	0.319281	1.45536	0.887998	1786.22	22.7053	1787.47	13.7802	1788.91	13.7299	1788.91	13.7299	99.8496	1655.54	13.275
BD/BC-10-4-46	2011-05-15	60.2186	62898.2	0.556189	8.63499	1.84852	5.5965	2.14174	0.350491	1.08166	0.505041	1936.94	18.0966	1915.56	18.4521	1892.47	33.2601	1892.47	33.2601	102.35	1656.15	8.08626
BD/BC-10-4-36	2011-05-15	84.9671	103325	2.00777	6.10521	0.291346	10.9943	1.47168	0.486818	1.44255	0.980208	2556.9	30.4482	2522.65	13.6981	2495.2	4.9072	2495.2	4.9072	102.473	1656.49	11.4814
BD/BC-10-4-97	2011-05-15	183.624	211478	1.74279	6.02828	0.179423	10.8176	1.26542	0.472956	1.25264	0.989897	2496.51	25.9285	2507.58	11.7621	2516.53	3.01573	2516.53	3.01573	99.2046	1658.19	24.0563
BD/BC-10-4-102	2011-05-15	228.92	87245.8	1.84742	5.87608	0.166557	10.6671	2.23427	0.454602	2.22805	0.997218	2415.68	44.8887	2494.56	20.7448	2559.41	2.7877	2559.41	2.7877	94.3842	1658.86	21.1613
BD/BC-10-4-33	2011-05-15	27.8888	41824.5	0.789679	5.66512	2.11299	11.7504	4.63468	0.482794	4.12498	0.890026	2539.42	86.586	2584.72	43.3953	2620.42	35.1546	2620.42	35.1546	96.9091	1659.05	14.7476
BD/BC-10-4-75	2011-05-15	107.617	222341	1.41042	5.04853	0.198874	15.0141	0.774995	0.549746	0.749044	0.966514	2824.12	17.1289	2816.13	7.37791	2810.41	3.25091	2810.41	3.25091	100.488	1659.37	7.24503
																					1659.37	14.3824
Sampe BD/BC-10-3: Defiance quartzite, Arizona (UTM, 12S, E 671140, N 3962078, NAD27)																					1659.48	20.7604
BD/BD-10-3-77	2011-05-15	203.721	206383	0.900582	10.9102	0.630052	3.26468	1.52852	0.258329	1.39262	0.911094	1481.29	18.4302	1472.68	11.8816	1460.28	11.9765	1460.28	11.9765	101.439	1659.48	14.2974
BD/BD-10-3-2	2011-05-15	124.252	73306.7	1.11117	10.8603	0.823572	3.17909	1.36745	0.250406	1.09162	0.798293	1440.57	14.0924	1452.09	10.5627	1468.98	15.6369	1468.98	15.6369	98.0657	1662.28	29.7734
BD/BD-10-3-8	2011-05-15	175.281	20903.6	1.58408	10.839	0.614234	2.79659	1.25594	0.219845	1.09549	0.872249	1281.06	12.7274	1354.63	9.39392	1472.72	11.6563	1472.72	11.6563	86.9859	1664.84	28.8496
BD/BD-10-3-50	2011-05-15	105.027	92773.6	1.30633	10.8299	1.25407	3.26222	1.65061	0.256235	1.07323	0.650201	1470.55	14.1117	1472.09	12.8285	1474.3	23.7942	1474.3	23.7942	99.7455	1664.89	43.2357
BD/BD-10-3-31	2011-05-15	262.936	7782.68	1.92886	10.7706	0.71082	3.1302	1.13718	0.244518	0.887644	0.780566	1410.14	11.2426	1440.14	8.75126	1484.72	13.4676	1484.72	13.4676	94.9773	1672.33	31.5329
BD/BD-10-3-44	2011-05-15	116.206	64373.1	1.24556	10.6895	0.730311	3.14612	2.858	0.243912	2.76312	0.966801	1407	34.9273	1444.05	22.0239	1499.02	13.8105	1499.02	13.8105	93.8616	1672.67	19.6487
BD/BD-10-3-96	2011-05-15	42.3031	59088.6	1.42446	10.5023	2.91028	3.66786	3.43591	0.27938	1.8264	0.531563	1588.24	25.7106	1564.4	27.4203	1532.36	54.7993	1532.36	54.7993	103.646	1680.22	44.4942
BD/BD-10-3-37	2011-05-15	111.829	100575	2.10383	10.498	1.35307	3.4893	1.95474	0.26567	1.41075	0.721708	1518.79	19.0894	1524.8	15.4281	1533.13	25.4708	1533.13	25.4708	99.0644	1682.33	15.0791
BD/BD-10-3-13	2011-05-15	20.4121	16272.8	0.928987	10.4407	5.59337	3.51299	5.86855	0.266014	1.77598	0.302627	1520.54	24.0561	1530.14	46.4168	1543.42	105.229	1543.42	105.229	98.5173	1686.65	11.3176
BD/BD-10-3-80	2011-05-15	29.9322	28769.8	1.79805	10.4001	3.83535	3.69593	4.54369	0.278778	2.43622	0.536176	1585.2	34.2375	1570.49	36.3267	1550.75	72.0539	1550.75	72.0539	102.222	1688.03	11.2265
BD/BD-10-3-11	2011-05-15	119.077	89003.6	2.00122	10.3948	0.886387	3.64379	1.77167	0.274707	1.53399	0.865845	1564.65	21.3109	1559.15	14.1163	1551.7	16.6456	1551.7	16.6456	100.835	1688.51	16.7823
BD/BD-10-3-17	2011-05-15	92.4658	78628.8	1.35459	10.3309	1.41583	3.68619	2.40216	0.276195	1.94056	0.807841	1572.17	27.0736	1568.38	19.1885	1563.27	26.547	1563.27	26.547	100.569	1692.78	19.7635
BD/BD-10-3-72	2011-05-15	155.872	131186	1.97217	10.3008	0.712069	3.60535	1.01448	0.269349	0.72259	0.712273	1537.5	9.88428	1550.71	8.06435	1568.75	13.3404	1568.75	13.3404	98.0079	1696.11	17.0224
BD/BD-10-3-66	2011-05-15	72.6265	50017.5	1.52668	10.2883	1.37829	3.6523	1.94435	0.272527	1.37143	0.705341	1553.61	18.9337	1561.01	15.5002	1571.01	25.8167	1571.01	25.8167	98.8925	1701.02	8.7871
BD/BD-10-27	2011-05-15	32.1556	30764.3	1.80082	10.2142	2.45897	3.7561	2.71172	0.278253	1.14318	0.421572	1582.56	16.042	1583.42	21.7484	1584.54	45.982	1584.54	45.982	99.8747	1702.65	22.5673
BD/BD-10-3-7	2011-05-15	46.9939	39346.1	1.39471	10.1794	1.86584	3.77744	2.09433	0.278882	0.951238	0.454197	1585.73	13.3721	1587.96	16.8158	1590.91	34.8587	1590.91	34.8587	99.6742	1704.54	35.2348
BD/BD-10-3-82	2011-05-15	49.9838	34844.3	2.81543	10.1464	1.87005	3.88605	2.02552	0.285968	0.778236	0.384215	1621.35	11.1562	1610.79	16.3589	1596.99	34.9098	1596.99	34.9098	101.525	1706.36	21.4326
BD/BD-10-3-6	2011-05-15	67.4515	189377	1.65943	10.1242	1.16537	3.76916	1.47394	0.276761	0.902454	0.612271	1575.03	12.6107	1586.2	11.8286	1601.07	21.7426	1601.07	21.7426	98.3734	1706.55	12.6305
BD/BD-10-3-46	2011-05-15	64.9703	41672.9	2.73239	10.1063	1.73519	3.77618	1.92365	0.276785	0.830372	0.431666	1575.15	11.6042	1587.69	15.444	1604.38	32.3606	1604.38	32.3606	98.1783	1711.6	11.8624
BD/BD-10-3-62	2011-05-15	189.046	104238	1.06332	10.0912	0.675259	3.90245	1.23386	0.285614	1.03268	0.836953	1619.57	14.7895	1614.19	9.97316	1607.16	12.5892	1607.16	12.5892	100.773	1712.09	11.7677
BD/BD-10-3-47	2011-05-15	56.0025	70721	1.79532	9.96394	1.38109	3.99511	1.65399	0.288708	0.910095	0.550243	1635.07	13.1435	1633.2	13.433	1630.78	25.6691	1630.78	25.6691	100.263	1712.91	10.4779
BD/BD-10-3-43	2011-05-15	171.85	152204	1.9928	9.94657	0.338079	3.90713	0.908053	0.281858	0.842771	0.928108	1600.71	11.9459	1615.16	7.3414	1634.02	6.2811	1634.02	6.2811	97.9615	1715.45	15.0037
BD/BD-10-3-73	2011-05-15	78.8915	62029.3	2.07101	9.94173	1.28403	3.96442	1.64401	0.285852	1.02666	0.624487	1620.77	14.7128	1626.95	13.3312	1634.93	23.8522	1634.93	23.8522	99.1338	1717.04	23.0409
BD/BD-10-3-88	2011-05-15	90.3526	148549	1.43962	9.93878	0.882013	4.15784	1.1878	0.299709	0.795558	0.669777	1689.87	11.8262	1665.75	9.72266	1635.48	16.3823	1635.48	16.3823	103.325	1718.09	11.5561
BD/BD-10-3-75	2011-05-15	69.406	129895	1.99231	9.93383	1.14127	4.04211	1.77883	0.291221	1.36445	0.767052	1647.63	19.8382	1642.71	14.4807	1636.41	21.1959	1636.41	21.1959	100.686	1739.56	11.5548
BD/BD-10-3-25	2011-05-15	124.398	83614.9	0.826123	9.90881	0.757277	4.08333	1.27826	0.29345	1.0298	0.805625	1658.75	15.0611	1650.98	10.4263	1641.09	14.0567	1641.09	14.0567	101.076	1744.42	9.60512
BD/BD-10-3-67	2011-05-15	86.4653	64356.5	1.86695	9.8953	0.718474	4.02263	1.46669	0.288694	1.27867	0.871801	1635	18.4657	1638.78	11.928	1643.62	13.332	1643.62	13.332	99.4756	1754.02	32.0701
BD/BD-10-3-10	2011-05-15	163.986	167489	1.68545	9.89278	0.501117	4.03264	1.07825	0.289339	0.95473	0.885442	1638.22	13.8114	1640.8	8.77313	1644.09	9.29813	1644.09	9.29813	99.643	1758.61	7.58537
BD/BD-10-3-84	2011-05-15	86.0037	42950.1	1.69171	9.88853	0.99823	4.04523	2.61144	0.290117	2.41313	0.924058	1642.12	34.9822	1643.34	21.2636	1644.89	18.5187	1644.89	18.5187	99.8314	1758.63	159.299
BD/BD-10-3-76	2011-05-15	147.565	74697.7	1.17032	9.88742	0.978455	4.05321	1.74939	0.290657	1.45017	0.828956	1644.81	21.0527	1644.94	14.2487	1645.1	18.1513	1645.1	18.1513	99.9827	1764.05	22.2207
BD/BD-10-3-104	2011-05-15	180.237	38967.4	2.26755	9.88168	0.910052	3.46627	2.69258	0.248423	2.53412	0.941151	1430.34	32.5072	1519.58	21.2216	1646.17	16.8799	1646.17	16.8799	86.8887	1778.9	6.38873
BD/BD-10-3-71	2011-05-15	112.159	133312	1.39109	9.87926	0.740372	4.04607	1.96072	0.289906	1.81557	0.925968	1641.06	26.3046	1643.51	15.9648	1646.63	13.7331	1646.63	13.7331	99.6616	1782.6	6.02024
BD/BD-10-3-100	2011-05-15	131.023	201153	1.63826	9.87874	0.663364	4.15716	1.32776	0.29785	1.15018	0.86625	1680.64	17.016	1665.62	10.8681	1646.73	12.3045	1646.73	12.3045	102.059	1809.61	8.44776
BD/BD-10-3-97	2011-05-15	104.32	149221	2.02373	9.87834	0.755881	4.1589	2.01229	0.297962	1.86493	0.926769	1681.19	27.5983	1665.96	16.4733	1646.8	14.0205	1646.8	14.0205	102.088	1836.13	9.89616
BD/BD-10-3-36	2011-05-15	124.99	76051.5	1.46148	9.87074	0.849974	4.05762	1.5927	0.290482	1.34693	0.845693	1643.94	19.5449	1645.83	12.9751	1648.23	15.7612	1648.23	15.7612	99.7397	1836.78	11.6479
BD/BD-10-3-34	2011-05-15	304.264	9472.29	2.32746	9.86652	0.388141	3.82926	0.694241	0.274017	0.575601	0.829109	1561.16	7.98073	1598.92	5.58957	1649.02	7.1973	1649.02	7.1973	94.6719	1858.05	8.24721
BD/BD-10-3-92	2011-05-15	57.3108	17494.5	1.67883	9.86318	1.57009	4.11978	2.3133	0.294706	1.69887	0.734393	1665.01	24.9287	1658.23	18.9032	1649.65	29.112	1649.65	29.112	100.931	1323.69	137.668
BD/BD-10-3-1	2011-05-15	144.841	80850.7	2.09182	9.8626	0.521973	4.03436	1.06143	0.288579	0.924219	0.870729	1634.42	13.3428	1641.15	8.637	1649.76	9.67806	1649.76	9.67806	99.0704	1392.55	36.1158
BD/BD-10-3-85	2011-05-15	83.4189	88793.2	1.39555	9.86097	0.639716	4.15879	1.63613	0.29743	1.50588	0.920393	1678.55	22.2542	1665.94	13.3934	1650.07	11.8607	1650.07	11.8607	101.726	1449.9	35.8377
BD/BD-10-3-56	2011-05-15	77.9159	58311.5	2.03192	9.8603	1.07111	4.20103	2.37009	0.300431	2.11425	0.892054	1693.45	31.4872	1674.22	19.4408	1650.19	19.8574	1650.19	19.8574	102.621	1455.42	22.6527
BD/BD-10-3-20	2011-05-15	122.132	69165.8	1.96334	9.85997	0.533579	4.1613	4.23254	0.29758	4.19877	0.992022	1679.3	62.0759	1666.43	34.6632	1650.25	9.89263	1650.25	9.89263	101.76	1459.2	43.4407
BD/BD-10-3-81	2011-05-15	143.52	155543	1.57291	9.85329	0.716805	4.0966	2.0786	0.292754	1.95109	0.938658	1655.28	28.483	1653.63	16.9662	1651.51	13.2859	1651.51	13.2859	100.228	1465.39	28.8005
BD/BD-10-3-83	2011-05-15	61.8385	67471.1	1.82241	9.85099	1.66595	4.1574	2.16625	0.29703	1.38465	0.639193	1676.56	20.4414	1665.67	17.7327	1651.94	30.8806	1651.94	30.8806	101.49	1473	20.3149
BD/BD-10-3-54	2011-05-15	48.2819	8118.4	1.13236	9.84285	1.93874	3.65198	3.98076	0.260704	3.47675	0.873387	1493.44	46.3483	1560.94	31.7416	1653.47	35.9296	1653.47	35.9296	90.3215	1474.38	65.7904
BD/BD-10-3-53	2011-05-15	76.8867	114729	2.05478	9.84068	1.53152	4.08648	1.99261	0.291658	1.27473	0.63973	1649.81	18.5552	1651.61	16.2563	1653.88	28.3813	1653.88	28.3813	99.7537	1479.5	29.9014
BD/BD-10-3-57	2011-05-15	153.368	193751	1.70139	9.8348	0.901042	4.18926	1.56626	0.298814	1.28113	0.817955	1685.43	19.0006	1671.92	12.8395	1654.99	16.6939	1654.99	16.6939	101.839	1488.84	16.0811
BD/BD-10-3-102	2011-05-15	106.268	130615	0.824934	9.83407	0.856071	4.22228	2.53665	0.301147	2.38783	0.941332	1696.99	35.6269	1678.36	20.8275	1655.13	15.8603	1655.13	15.8603	102.529	1495.28	11.5764
BD/BD-10-3-19	2011-05-15	72.0824	57415.1	1.29383	9.83321	0.67152	4.02671	1.59324	0.287173	1.44481	0.906837	1627.39	20.7796	1639.61	12.9599	1655.29	12.4404	1655.29	12.4404	98.3143	1495.62	32.835
BD/BD-10-3-22	2011-05-15	126.421	123872	0.934401	9.83249	0.615145	4.10823	0.85411	0.292966	0.592537	0.693748	1656.33	8.65494	1655.94	6.97485	1655.43	11.3957	1655.43	11.3957	100.055	1507.87	21.1721
BD/BD-10-3-74	2011-05-15	75.156	104096	1.78804	9.83191	0.716582	4.07658	1.23533	0.290692	1.00626	0.814564	1644.99	14.6096	1649.63	10.0728	1655.54	13.275	1655.54	13.275	99.3627	1510.63	8.35059
BD/BD-10-3-5	2011-05-15	134.733	162775	1.46444	9.82865	0.436571	4.06681	1.13154	0.289899	1.04393	0.922574	1641.02	15.1245	1647.67	9.22212	1656.15	8.08626	1656.15	8.08626	99.0867	1515.59	33.5233
BD/BD-10-3-52	2011-05-15	125.878	428364	1.30198	9.82682	0.619857	4.03917	1.22105	0.287875	1.05202	0.861568	1630.9	15.1591	1642.12	9.93827	1656.49	11.4814	1656.49	11.4814	98.4551	1528.8	108.758
BD/BD-10-3-21	2011-05-15	58.9518	69050.4	1.542	9.81782	1.29889	4.07801	1.51267	0.290377	0.775278	0.512524	1643.41	11.2466	1649.92	12.3353	1658.19	24.0563	1658.19	24.0563	99.1088	1536.36	49.4846
BD/BD-10-3-40	2011-05-15	77.9514	56407.9	1.89219	9.81431	1.14269	4.08849	1.63481	0.291019	1.16912	0.715144	1646.62	16.989	1652.01	13.3381	1658.86	21.1613	1658.86	21.1613	99.2625	1538.44	23.3913
BD/BD-10-3-68	2011-05-15	96.1535	75039	1.48134	9.81328	0.796418	3.96916	1.75914	0.282495	1.56853	0.891647	1603.92	22.2725	1627.91	14.2684	1659.05	14.7476	1659.05	14.7476	96.6769	1539.45	26.8896
BD/BD-10-28	2011-05-15	157.904	131500	2.18239	9.81158	0.391324	4.25725	1.02079	0.302947	0.942806	0.923602	1705.91	14.1313	1685.14	8.39359	1659.37	7.24503	1659.37	7.24503	102.804	1540.85	27.054
BD/BD-10-3-39	2011-05-15	73.0322	53011.7	1.59194	9.81156	0.776736	4.07957	1.72371	0.290302	1.53879	0.892717	1643.04	22.3181	1650.23	14.0576	1659.37	14.3824	1659.37	14.3824	99.0156	1544.36	16.8615
BD/BD-10-3-91	2011-05-15	65.3806	66387.3	2.24106	9.811	1.12114	4.19507	1.69944	0.298505	1.27716	0.751519	1683.89	18.9266	1673.06	13.9351	1659.48	20.7604	1659.48	20.7604	101.471	1551.58	19.3582
BD/BD-10-3-99	2011-05-15	155.387	318959	1.66096	9.81098	0.772156	4.24908	1.10278	0.302347	0.787338	0.713957	1702.94	11.7831	1683.56	9.06447	1659.48	14.2974	1659.48	14.2974	102.619	1562.08	38.0159
BD/BD-10-3-45	2011-05-15	71.9467	93640.6	1.23545	9.79617	1.60835	4.09014	2.32425	0.290598	1.6779	0.721909	1644.52	24.355	1652.34	18.9659	1662.28	29.7734	1662.28	29.7734	98.9314	1562.28	19.9253
BD/BD-10-3-69	2011-05-15	50.5057	27119.3	1.78769	9.78263	1.55897	4.01067	2.1946	0.284559	1.54463	0.703833	1614.28	22.0579	1636.36	17.8382	1664.84	28.8496	1664.84	28.8496	96.9632	1564.37	56.7331
BD/BD-10-3-87	2011-05-15	40.2113	22139.5	1.36886	9.78236	2.33624	4.02637	3.13744	0.285665	2.09415	0.667472	1619.83	29.9957	1639.54	25.5244	1664.89	43.2357	1664.89	43.2357	97.2935	1574.42	10.1105
BD/BD-10-3-38	2011-05-15	64.4005	15076.6	1.02411	9.74311	1.70566	3.75112	2.27425	0.265068	1.50431	0.661453	1515.72	20.3189	1582.35	18.2339	1672.33	31.5329	1672.33	31.5329	90.6353	1578.46	85.6277
BD/BD-10-3-101	2011-05-15	88.9467	49604.5	1.71781	9.7413	1.0629	4.1958	3.13176	0.296436	2.94587	0.940645	1673.61	43.4228	1673.2	25.6846	1672.67	19.6487	1672.67	19.6487	100.056	1595.5	8.08834
BD/BD-10-26	2011-05-15	33.5339	34921.1	1.15397	9.70159	2.40891	4.13921	2.55083	0.291246	0.838976	0.328903	1647.75	12.1988	1662.08	20.8638	1680.22	44.4942	1680.22	44.4942	98.0678	1600.02	14.4761
BD/BD-10-3-15	2011-05-15	82.1735	72166.3	1.64123	9.69048	0.816647	4.30711	1.36359	0.302712	1.092	0.800828	1704.74	16.3578	1694.72	11.2372	1682.33	15.0791	1682.33	15.0791	101.332	1604.12	24.3484
BD/BD-10-3-55	2011-05-15	74.6626	84646.2	1.69603	9.66782	0.613273	4.31153	1.65287	0.302314	1.53489	0.928619	1702.77	22.9688	1695.57	13.6241	1686.65	11.3176	1686.65	11.3176	100.956	1606.16	15.7499
BD/BD-10-3-58	2011-05-15	62.8326	71536.7	2.19456	9.6606	0.608446	4.35074	1.81375	0.304836	1.70865	0.942053	1715.24	25.7326	1703.04	14.9757	1688.03	11.2265	1688.03	11.2265	101.612	1606.44	32.9703
BD/BD-10-3-89	2011-05-15	89.9857	103373	1.47555	9.65811	0.909688	4.17013	1.0613	0.292106	0.546641	0.515069	1652.04	7.96641	1668.17	8.6921	1688.51	16.7823	1688.51	16.7823	97.8405	1607.02	9.02357
BD/BD-10-3-9	2011-05-15	107.609	402707	1.9393	9.63576	1.07184	4.26534	1.53657	0.298084	1.101	0.716532	1681.8	16.2983	1686.7	12.6395	1692.78	19.7635	1692.78	19.7635	99.3513	1607.52	25.5883
BD/BD-10-3-24	2011-05-15	126.691	91198.8	2.12769	9.61838	0.923588	4.32778	1.45453	0.301902	1.12368	0.772536	1700.73	16.7977	1698.67	11.9976	1696.11	17.0224	1696.11	17.0224	100.272	1615.4	19.2224
BD/BD-10-3-86	2011-05-15	129.208	151209	3.08439	9.59277	0.477115	4.35564	0.989966	0.303036	0.867407	0.876199	1706.35	13.0041	1703.97	8.17523	1701.02	8.7871	1701.02	8.7871	100.313	1616.95	28.2839
BD/BD-10-3-59	2011-05-15	106.248	111635	2.02782	9.5843	1.2254	4.47615	1.94739	0.311146	1.51351	0.777199	1746.34	23.1535	1726.56	16.164	1702.65	22.5673	1702.65	22.5673	102.566	1620.02	20.851
BD/BD-10-3-60	2011-05-15	75.9343	20796.2	1.9177	9.57446	1.91355	4.44347	2.32721	0.308557	1.32447	0.569124	1733.6	20.1328	1720.48	19.2914	1704.54	35.2348	1704.54	35.2348	101.705	1621.04	9.72063
BD/BD-10-3-65	2011-05-15	57.7643	33362.6	2.00581	9.56497	1.16434	4.40108	4.01589	0.305311	3.8434	0.957047	1717.59	57.9526	1712.54	33.2388	1706.36	21.4326	1706.36	21.4326	100.658	1625.58	17.1476
BD/BD-10-3-64	2011-05-15	105.172	107036	1.51074	9.56399	0.686233	4.43864	0.864104	0.307884	0.52513	0.607715	1730.29	7.96898	1719.58	7.16082	1706.55	12.6305	1706.55	12.6305	101.391	1630.09	28.4898
BD/BD-10-3-16	2011-05-15	105.059	90407.6	2.83591	9.53778	0.644916	4.35186	1.08666	0.301038	0.874598	0.804847	1696.45	13.0454	1703.25	8.97235	1711.6	11.8624	1711.6	11.8624	99.1149	1630.36	16.8099
BD/BD-10-3-61	2011-05-15	142.569	117659	1.66525	9.53523	0.639809	4.45051	1.02643	0.307779	0.802622	0.781955	1729.77	12.1769	1721.79	8.51025	1712.09	11.7677	1712.09	11.7677	101.032	1631.28	17.1195
BD/BD-10-3-93	2011-05-15	189.447	64691.8	3.72353	9.531	0.569751	4.59118	2.27983	0.317367	2.20749	0.968269	1776.86	34.2828	1747.67	19.011	1712.91	10.4779	1712.91	10.4779	103.733	1634.85	11.0493
BD/BD-10-3-48	2011-05-15	139.807	59617.4	2.647	9.51785	0.816063	4.19493	1.38728	0.289576	1.12187	0.808683	1639.41	16.2397	1673.03	11.3752	1715.45	15.0037	1715.45	15.0037	95.5675	1637.45	36.8995
BD/BD-10-3-23	2011-05-15	195.957	17015.7	3.82584	9.50962	1.25338	3.9828	3.31655	0.274695	3.07059	0.925839	1564.59	42.657	1630.7	26.9236	1717.04	23.0409	1717.04	23.0409	91.1214	1637.63	25.5315
BD/BD-10-3-51	2011-05-15	163.022	176205	2.46718	9.50418	0.628684	4.39631	1.01455	0.303041	0.796289	0.784866	1706.37	11.938	1711.65	8.39279	1718.09	11.5561	1718.09	11.5561	99.3179	1637.68	12.1642
BD/BD-10-3-98	2011-05-15	119.754	151946	2.17676	9.39366	0.630406	4.69537	3.57852	0.319892	3.52256	0.984361	1789.2	55.0366	1766.41	29.9645	1739.56	11.5548	1739.56	11.5548	102.854	1639.39	22.4153
BD/BD-10-3-70	2011-05-15	214.131	25249.4	2.49984	9.36879	0.524371	4.49298	1.2905	0.305293	1.17917	0.913726	1717.5	17.7788	1729.67	10.7184	1744.42	9.60512	1744.42	9.60512	98.4571	1640.79	18.9085
BD/BD-10-3-32	2011-05-15	46.6652	42999.9	1.3414	9.31979	1.75264	4.34385	3.73011	0.293616	3.29271	0.882739	1659.57	48.1786	1701.73	30.7967	1754.02	32.0701	1754.02	32.0701	94.6155	1641.4	39.8344
BD/BD-10-3-63	2011-05-15	340.163	22009.2	1.305	9.2964	0.414764	4.5601	3.02096	0.307459	2.99235	0.99053	1728.19	45.3625	1742.01	25.1626	1758.61	7.58537	1758.61	7.58537	98.2701	1641.45	22.987
BD/BD-10-3-105	2011-05-15	57.056	7611.56	1.8241	9.29633	8.69431	4.52985	10.7171	0.305418	6.2662	0.584692	1718.12	94.5144	1736.47	89.3711	1758.63	159.299	1758.63	159.299	97.6965	1641.82	29.2557
BD/BD-10-3-41	2011-05-15	84.2293	73264.6	2.30608	9.26879	1.216	4.5971	2.00143	0.309034	1.58968	0.794272	1735.95	24.1928	1748.74	16.6929	1764.05	22.2207	1764.05	22.2207	98.407	1642.84	17.327
BD/BD-10-3-103	2011-05-15	258.377	285957	5.58449	9.19375	0.350312	4.87122	1.85796	0.32481	1.82464	0.982064	1813.17	28.8386	1797.29	15.6535	1778.9	6.38873	1778.9	6.38873	101.927	1643.38	15.4522
BD/BD-10-3-42	2011-05-15	247.949	1.38821e+06	1.84562	9.17508	0.330262	4.66951	1.84917	0.310728	1.81944	0.983922	1744.29	27.8052	1761.79	15.4656	1782.6	6.02024	1782.6	6.02024	97.8507	1643.76	37.5194
BD/BD-10-3-94	2011-05-15	132.487	160434	4.66301	9.03996	0.464939	5.13435	1.44714	0.336629	1.37042	0.946984	1870.43	22.2491	1841.81	12.2992	1809.61	8.44776	1809.61	8.44776	103.361	1645.03	17.2619
BD/BD-10-3-3	2011-05-15	133.41	126923	8.05725	8.90876	0.546295	5.10891	1.06878	0.330099	0.918617	0.859499	1838.86	14.6965	1837.59	9.07601	1836.13	9.89616	1836.13	9.89616	100.149	1645.16	14.5133
BD/BD-10-3-18	2011-05-15	122.757	114101	4.51468	8.90554	0.643044	5.0843	1.06586	0.32839	0.85003	0.797506	1830.57	13.5462	1833.49	9.04403	1836.78	11.6479	1836.78	11.6479	99.6618	1645.34	13.3065
BD/BD-10-3-4	2011-05-15	175.75	186314	2.14514	8.80147	0.456584	5.2173	1.33579	0.333042	1.25534	0.93977	1853.11	20.2179	1855.45	11.3823	1858.05	8.24721	1858.05	8.24721	99.7344	1645.35	14.3724
																					1647.28	10.9696
Sampe KEKDEFQTZT-1: Defiance quartzite, Arizona (UTM, 12S, E 671109, N 3961552, NAD27)																					1647.31	13.7041
KEKDEFZTZT1-40	2012-08-11	14.4709	14497.8	0.725053	11.7152	7.09976	2.71285	8.29553	0.230502	4.29059	0.517217	1337.13	51.8128	1331.98	61.6205	1323.69	137.668	1323.69	137.668	101.015	1647.59	29.3698
KEKDEFQTZT-1-104	2012-08-11	73.9369	82384.2	1.82387	11.3041	1.88238	2.94517	2.22279	0.241459	1.18212	0.531819	1394.28	14.8215	1393.6	16.8505	1392.55	36.1158	1392.55	36.1158	100.124	1648.34	14.7591
KEKDEFZTZT1-34	2012-08-11	46.1189	52543.4	1.12893	10.9699	1.88254	3.26543	2.40136	0.259801	1.49083	0.620826	1488.82	19.8192	1472.86	18.6687	1449.9	35.8377	1449.9	35.8377	102.685	1650.36	26.1701
KEKDEFQTZT-1-88	2012-08-11	64.6362	73193.7	1.19556	10.9381	1.19088	3.13023	2.09388	0.248323	1.72225	0.822514	1429.82	22.0854	1440.15	16.1146	1455.42	22.6527	1455.42	22.6527	98.241	1651.57	13.3844
KEKDEFQTZT-1-82	2012-08-11	63.4759	66008.6	1.11806	10.9164	2.28469	3.29974	3.71945	0.261251	2.93505	0.789107	1496.24	39.1918	1480.99	28.9911	1459.2	43.4407	1459.2	43.4407	102.538	1651.9	46.4624
KEKDEFQTZT-1-83	2012-08-11	105.209	93071.5	0.647425	10.8809	1.51609	3.24751	1.91525	0.256279	1.17033	0.611058	1470.78	15.3905	1468.58	14.8697	1465.39	28.8005	1465.39	28.8005	100.367	1651.98	22.7033
KEKDEFQTZT-1-17	2012-08-11	89.9829	87174.8	0.916548	10.8374	1.07052	3.27603	1.624	0.257496	1.22121	0.751979	1477.02	16.1203	1475.38	12.6341	1473	20.3149	1473	20.3149	100.273	1652.06	27.1687
KEKDEFQTZT-1-35	2012-08-11	37.698	36143.5	0.73812	10.8295	3.4667	3.26164	4.05153	0.256178	2.09687	0.517551	1470.26	27.5667	1471.95	31.4954	1474.38	65.7904	1474.38	65.7904	99.7203	1652.12	25.1506
KEKDEFZTZT1-45	2012-08-11	96.7607	33235.9	1.31417	10.8003	1.57701	3.05251	1.87394	0.239107	1.01226	0.540179	1382.05	12.592	1420.86	14.3333	1479.5	29.9014	1479.5	29.9014	93.4134	1652.92	13.654
KEKDEFQTZT-1-84	2012-08-11	63.062	50192.3	0.886673	10.7472	0.849221	3.26275	1.90399	0.254318	1.70412	0.895023	1460.71	22.2735	1472.22	14.7986	1488.84	16.0811	1488.84	16.0811	98.1106	1653.03	36.052
KEKDEFQTZT-1-47	2012-08-11	134.491	164949	1.24428	10.7107	0.611865	3.35111	1.28435	0.260318	1.12924	0.879228	1491.47	15.0359	1493.05	10.0442	1495.28	11.5764	1495.28	11.5764	99.745	1653.09	15.7357
KEKDEFQTZT-1-16	2012-08-11	55.8231	40956.1	0.896515	10.7088	1.73553	3.36816	2.33941	0.261596	1.56869	0.670549	1498	20.9685	1497.02	18.318	1495.62	32.835	1495.62	32.835	100.16	1653.44	12.0807
KEKDEFQTZT-1-64	2012-08-11	136.896	4730.97	0.846004	10.6396	1.12098	3.25754	3.52389	0.25137	3.34084	0.948055	1445.54	43.2623	1470.98	27.3835	1507.87	21.1721	1507.87	21.1721	95.8666	1653.61	16.6054
KEKDEFQTZT-1-68	2012-08-11	172.103	73886.3	1.15081	10.6241	0.442355	3.3621	1.75835	0.25906	1.70179	0.967838	1485.03	22.5725	1495.61	13.7618	1510.63	8.35059	1510.63	8.35059	98.3056	1653.79	8.62358
KEKDEFZTZT1-5	2012-08-11	58.9749	29243.2	0.889069	10.5962	1.77661	3.38083	2.22924	0.259819	1.34654	0.604034	1488.92	17.902	1499.96	17.4702	1515.59	33.5233	1515.59	33.5233	98.24	1653.92	16.8537
KEKDEFZTZT1-11	2012-08-11	132.231	7925.27	0.635755	10.5222	5.76954	3.17455	7.3721	0.242263	4.58915	0.622502	1398.45	57.6946	1450.99	56.9835	1528.8	108.758	1528.8	108.758	91.474	1654.06	16.8951
KEKDEFQTZT-1-80	2012-08-11	44.7913	29634.9	0.904648	10.48	2.62953	3.64574	2.90956	0.277105	1.24543	0.428049	1576.76	17.4203	1559.58	23.188	1536.36	49.4846	1536.36	49.4846	102.63	1654.22	25.4114
KEKDEFQTZT-1-93	2012-08-11	76.3384	98797.1	0.897058	10.4684	1.24349	3.60134	2.16365	0.273429	1.77063	0.818352	1558.18	24.5085	1549.83	17.1964	1538.44	23.3913	1538.44	23.3913	101.284	1654.34	20.99
KEKDEFZTZT1-9	2012-08-11	67.9395	83082.5	0.922894	10.4628	1.42961	3.61261	1.80945	0.274137	1.10919	0.612998	1561.77	15.3842	1552.31	14.3906	1539.45	26.8896	1539.45	26.8896	101.45	1654.95	11.0501
KEKDEFQTZT-1-101	2012-08-11	81.3445	106614	1.18173	10.455	1.43862	3.6386	1.65383	0.275904	0.815791	0.493275	1570.7	11.372	1558.02	13.1732	1540.85	27.054	1540.85	27.054	101.937	1656.28	12.4785
KEKDEFQTZT-1-65	2012-08-11	88.4811	58001.4	1.13787	10.4355	0.897016	3.52149	1.42254	0.266525	1.10408	0.77613	1523.14	14.9776	1532.05	11.2501	1544.36	16.8615	1544.36	16.8615	98.6259	1656.7	15.9671
KEKDEFZTZT1-48	2012-08-11	103.073	95584.4	1.63568	10.3955	1.03082	3.63586	1.90333	0.274126	1.60002	0.840645	1561.71	22.1914	1557.42	15.1584	1551.58	19.3582	1551.58	19.3582	100.653	1657.14	36.943
KEKDEFQTZT-1-23	2012-08-11	70.974	35645.3	0.973284	10.3375	2.02705	3.58898	2.3852	0.269081	1.25708	0.527032	1536.14	17.182	1547.1	18.9435	1562.08	38.0159	1562.08	38.0159	98.3389	1657.28	20.1057
KEKDEFQTZT-1-22	2012-08-11	95.1081	97547.9	1.13854	10.3363	1.06259	3.71104	1.51241	0.278203	1.07625	0.711608	1582.31	15.1005	1573.75	12.0976	1562.28	19.9253	1562.28	19.9253	101.282	1657.4	26.7404
KEKDEFQTZT-1-46	2012-08-11	32.6132	48887.1	0.726255	10.3249	3.02572	3.65151	3.83646	0.273435	2.35869	0.614809	1558.22	32.6491	1560.84	30.5893	1564.37	56.7331	1564.37	56.7331	99.6066	1658.44	17.5709
KEKDEFZTZT1-3	2012-08-11	161.037	606311	1.52689	10.2696	0.540091	3.77173	2.13718	0.280927	2.06781	0.967541	1596.03	29.2348	1586.75	17.1545	1574.42	10.1105	1574.42	10.1105	101.373	1658.66	7.06316
KEKDEFQTZT-1-38	2012-08-11	46.261	11918.5	1.58274	10.2474	4.57378	3.41817	6.30515	0.254043	4.33999	0.688324	1459.29	56.6778	1508.58	49.5703	1578.46	85.6277	1578.46	85.6277	92.4501	1658.78	48.2411
KEKDEFQTZT-1-106	2012-08-11	115.586	93576.3	1.77521	10.1545	0.433189	3.95709	2.66008	0.291429	2.62457	0.986651	1648.66	38.1807	1625.44	21.5645	1595.5	8.08834	1595.5	8.08834	103.332	1659.13	18.479
KEKDEFQTZT-1-92	2012-08-11	91.1576	114112	0.517263	10.1299	0.775748	3.83835	1.02747	0.282	0.673722	0.655712	1601.43	9.55345	1600.83	8.27664	1600.02	14.4761	1600.02	14.4761	100.088	1659.54	7.41229
KEKDEFQTZT-1-76	2012-08-11	188.245	48327.8	0.804132	10.1077	1.30553	4.01696	10.0297	0.294474	9.94439	0.991492	1663.85	145.856	1637.63	81.7169	1604.12	24.3484	1604.12	24.3484	103.724	1660.07	24.4102
KEKDEFQTZT-1-52	2012-08-11	101.602	108859	0.78362	10.0966	0.84477	3.87612	2.35408	0.28384	2.19729	0.933394	1610.67	31.3163	1608.72	19.0031	1606.16	15.7499	1606.16	15.7499	100.281	1660.16	16.5609
KEKDEFZTZT1-4	2012-08-11	47.5251	50659.5	0.927839	10.0951	1.76835	3.88967	1.97509	0.284788	0.879712	0.445405	1615.43	12.5704	1611.54	15.9546	1606.44	32.9703	1606.44	32.9703	100.559	1660.32	16.6566
KEKDEFQTZT-1-21	2012-08-11	157.58	150270	1.30964	10.092	0.484002	3.92087	1.06453	0.286984	0.948137	0.890664	1626.44	13.6293	1618	8.61268	1607.02	9.02357	1607.02	9.02357	101.208	1660.67	29.2853
KEKDEFQTZT-1-36	2012-08-11	50.749	11988.1	0.94849	10.0893	1.37261	3.86775	1.88443	0.28302	1.29114	0.685161	1606.55	18.3602	1606.98	15.2045	1607.52	25.5883	1607.52	25.5883	99.9401	1660.77	14.6534
KEKDEFQTZT-1-41	2012-08-11	108.873	16190.9	2.0488	10.0467	1.03222	3.21792	3.25135	0.234475	3.08315	0.948267	1357.91	37.7513	1461.48	25.1918	1615.4	19.2224	1615.4	19.2224	84.0604	1660.82	14.5145
KEKDEFQTZT-1-37	2012-08-11	47.2457	40244.8	0.970515	10.0383	1.51903	4.03958	1.91755	0.294101	1.17027	0.610295	1661.99	17.1449	1642.2	15.6082	1616.95	28.2839	1616.95	28.2839	102.786	1661.19	26.2447
KEKDEFQTZT-1-81	2012-08-11	63.1373	76310.2	0.761772	10.0218	1.12034	3.90862	2.03438	0.284097	1.6981	0.834702	1611.96	24.2188	1615.47	16.4499	1620.02	20.851	1620.02	20.851	99.5024	1661.37	18.9222
KEKDEFQTZT-1-43	2012-08-11	196.154	12781.1	0.95836	10.0163	0.522424	3.15349	1.40434	0.229085	1.30355	0.92823	1329.7	15.6625	1445.85	10.8267	1621.04	9.72063	1621.04	9.72063	82.0279	1661.46	13.3608
KEKDEFQTZT-1-1	2012-08-11	48.4127	62011.9	1.09009	9.99187	0.922037	4.15542	1.81072	0.301134	1.55838	0.860642	1696.93	23.2504	1665.28	14.8205	1625.58	17.1476	1625.58	17.1476	104.389	1661.85	13.7383
KEKDEFQTZT-1-86	2012-08-11	40.4927	58826.3	0.725821	9.96766	1.53269	4.02941	2.29535	0.291296	1.70865	0.744398	1648	24.8475	1640.15	18.6746	1630.09	28.4898	1630.09	28.4898	101.099	1661.88	16.4505
KEKDEFQTZT-1-33	2012-08-11	77.8223	102498	1.4522	9.9662	0.904435	4.00872	1.58455	0.289757	1.30107	0.8211	1640.31	18.8429	1635.97	12.8777	1630.36	16.8099	1630.36	16.8099	100.611	1662.56	29.8936
KEKDEFQTZT-1-34	2012-08-11	93.1852	167203	0.570214	9.96127	0.9212	3.91799	1.68876	0.283059	1.41538	0.838118	1606.75	20.129	1617.4	13.6615	1631.28	17.1195	1631.28	17.1195	98.4963	1663.14	13.7167
KEKDEFZTZT1-21	2012-08-11	116.406	207414	1.31774	9.94218	0.594786	4.10367	1.41051	0.295905	1.27897	0.906744	1670.97	18.8261	1655.03	11.5164	1634.85	11.0493	1634.85	11.0493	102.21	1663.51	20.9332
KEKDEFZTZT1-20	2012-08-11	129.568	14962.4	1.07043	9.92826	1.98697	3.99843	5.24033	0.287913	4.84903	0.925328	1631.09	69.8819	1633.88	42.5892	1637.45	36.8995	1637.45	36.8995	99.6119	1663.72	27.9755
KEKDEFZTZT1-42	2012-08-11	59.0723	71765.7	0.895783	9.92729	1.37499	3.97838	3.59294	0.286441	3.31944	0.923876	1623.72	47.647	1629.8	29.162	1637.63	25.5315	1637.63	25.5315	99.1507	1665.01	37.6524
KEKDEFZTZT1-38	2012-08-11	54.899	27150.2	1.15327	9.92703	0.655037	4.01449	6.49049	0.289034	6.45735	0.994894	1636.7	93.3442	1637.13	52.8083	1637.68	12.1642	1637.68	12.1642	99.9402	1665.59	14.5045
KEKDEFZTZT1-6	2012-08-11	62.6541	99781.1	1.4451	9.91787	1.20738	4.07042	2.07569	0.29279	1.68841	0.81342	1655.46	24.6505	1648.4	16.9211	1639.39	22.4153	1639.39	22.4153	100.98	1667.3	10.7131
KEKDEFQTZT-1-45	2012-08-11	69.9062	94290.1	1.10553	9.91041	1.01861	3.98924	1.34081	0.286735	0.871891	0.650274	1625.19	12.5248	1632.01	10.886	1640.79	18.9085	1640.79	18.9085	99.0494	1667.43	31.9851
KEKDEFQTZT-1-55	2012-08-11	52.035	40546.9	1.14895	9.90715	2.14605	4.15765	2.90493	0.298742	1.95783	0.673967	1685.07	29.0314	1665.72	23.7816	1641.4	39.8344	1641.4	39.8344	102.66	1667.6	13.7256
KEKDEFQTZT-1-51	2012-08-11	59.9404	71304.8	1.22943	9.90687	1.23859	4.04407	2.53515	0.290572	2.21198	0.872526	1644.39	32.1052	1643.11	20.641	1641.45	22.987	1641.45	22.987	100.179	1668.33	22.0896
KEKDEFZTZT1-44	2012-08-11	48.5179	39358.7	0.909288	9.90488	1.57635	4.163	2.04082	0.299057	1.29617	0.635124	1686.63	19.2357	1666.77	16.71	1641.82	29.2557	1641.82	29.2557	102.729	1669.09	28.6665
KEKDEFQTZT-1-48	2012-08-11	73.2287	104422	0.763501	9.89947	0.933661	4.05714	1.19281	0.291293	0.742348	0.622351	1647.99	10.7952	1645.73	9.71696	1642.84	17.327	1642.84	17.327	100.314	1669.47	19.9418
KEKDEFZTZT1-33	2012-08-11	81.1601	66805.1	0.939503	9.89655	0.8327	4.15999	3.4395	0.29859	3.33718	0.970251	1684.31	49.4663	1666.18	28.1631	1643.38	15.4522	1643.38	15.4522	102.491	1670.44	13.3685
KEKDEFQTZT-1-7	2012-08-11	51.6521	55697.1	1.11032	9.89455	2.02198	4.2455	3.10229	0.304666	2.35283	0.758416	1714.4	35.419	1682.87	25.5003	1643.76	37.5194	1643.76	37.5194	104.298	1674.79	9.01286
KEKDEFQTZT-1-18	2012-08-11	56.0114	95622.4	1.10221	9.88776	0.930417	4.08306	1.629	0.292808	1.33715	0.820841	1655.54	19.5231	1650.92	13.2873	1645.03	17.2619	1645.03	17.2619	100.639	1675.42	9.54288
KEKDEFQTZT-1-12	2012-08-11	77.3723	106880	0.823487	9.8871	0.782288	3.88257	1.36806	0.278411	1.12233	0.820378	1583.36	15.7564	1610.06	11.0465	1645.16	14.5133	1645.16	14.5133	96.2435	1676.96	11.8457
KEKDEFQTZT-1-58	2012-08-11	110.736	209591	1.73099	9.88611	0.717254	3.99887	0.885688	0.286723	0.519604	0.586668	1625.13	7.46394	1633.97	7.19421	1645.34	13.3065	1645.34	13.3065	98.7714	1677.72	9.78299
KEKDEFQTZT-1-32	2012-08-11	126.801	133980	1.72827	9.88607	0.774712	4.06035	1.35713	0.291129	1.11428	0.821058	1647.17	16.1969	1646.38	11.0574	1645.35	14.3724	1645.35	14.3724	100.111	1683.08	61.4098
KEKDEFQTZT-1-98	2012-08-11	70.4587	91710	1.1981	9.87581	0.591443	4.14177	1.12398	0.296659	0.955782	0.850357	1674.72	14.0964	1662.59	9.19332	1647.28	10.9696	1647.28	10.9696	101.666	1683.38	29.5572
KEKDEFQTZT-1-89	2012-08-11	55.4963	132461	1.52291	9.87562	0.738875	4.11728	1.61296	0.294899	1.43377	0.888908	1665.96	21.0493	1657.74	13.178	1647.31	13.7041	1647.31	13.7041	101.132	1684.11	33.4724
KEKDEFZTZT1-1	2012-08-11	64.0235	94748.3	1.2608	9.87414	1.58367	4.12099	2.18814	0.295121	1.50995	0.690061	1667.07	22.1805	1658.47	17.8812	1647.59	29.3698	1647.59	29.3698	101.182	1684.85	11.4861
KEKDEFQTZT-1-70	2012-08-11	183.441	25525	1.09532	9.87018	0.79595	4.27135	9.03063	0.305766	8.99548	0.996108	1719.84	135.81	1687.86	74.4334	1648.34	14.7591	1648.34	14.7591	104.338	1685	10.2249
KEKDEFQTZT-1-102	2012-08-11	36.3074	73942.5	1.22475	9.85941	1.41158	4.10228	2.71649	0.293342	2.32094	0.854388	1658.21	33.9349	1654.76	22.1803	1650.36	26.1701	1650.36	26.1701	100.476	1685.93	15.5585
KEKDEFZTZT1-35	2012-08-11	109.365	130485	1.7168	9.85297	0.722121	4.08437	2.24167	0.291871	2.12218	0.946694	1650.87	30.9083	1651.19	18.2868	1651.57	13.3844	1651.57	13.3844	99.9578	1687.76	7.95684
KEKDEFQTZT-1-5	2012-08-11	31.7233	29639.8	1.01951	9.85122	2.50637	4.27767	2.95622	0.30563	1.5676	0.530272	1719.17	23.6555	1689.07	24.3341	1651.9	46.4624	1651.9	46.4624	104.072	1688.76	80.5305
KEKDEFQTZT-1-109	2012-08-11	59.4522	57118	1.43671	9.85077	1.22487	4.09125	1.67644	0.292297	1.14462	0.682766	1653	16.6894	1652.56	13.6797	1651.98	22.7033	1651.98	22.7033	100.061	1689.46	12.8147
KEKDEFZTZT1-7	2012-08-11	50.2843	117791	1.16025	9.85038	1.46575	4.13499	2.71897	0.295411	2.29005	0.842251	1668.51	33.6656	1661.25	22.235	1652.06	27.1687	1652.06	27.1687	100.996	1692.27	22.0987
KEKDEFQTZT-1-9	2012-08-11	59.5222	59058.5	1.44599	9.85005	1.35691	4.11421	1.48116	0.293916	0.593837	0.400927	1661.07	8.69567	1657.13	12.0993	1652.12	25.1506	1652.12	25.1506	100.542	1692.61	9.13979
KEKDEFQTZT-1-2	2012-08-11	85.2617	49585.8	1.2029	9.84578	0.736796	4.12522	1.135	0.294575	0.863344	0.760654	1664.35	12.664	1659.31	9.27627	1652.92	13.654	1652.92	13.654	100.691	1694.66	14.2993
KEKDEFQTZT-1-40	2012-08-11	53.4829	181735	0.827122	9.84521	1.94523	4.10022	2.06552	0.292773	0.694574	0.336272	1655.37	10.1402	1654.35	16.8623	1653.03	36.052	1653.03	36.052	100.142	1696.64	61.5795
KEKDEFQTZT-1-13	2012-08-11	66.143	73870.7	1.41368	9.84489	0.849125	4.22268	3.5654	0.301508	3.46281	0.971227	1698.78	51.714	1678.44	29.2788	1653.09	15.7357	1653.09	15.7357	102.764	1701.75	10.2945
KEKDEFQTZT-1-79	2012-08-11	199.895	4487.25	1.07511	9.84304	0.651954	3.93724	5.73046	0.281073	5.69325	0.993507	1596.77	80.528	1621.37	46.4333	1653.44	12.0807	1653.44	12.0807	96.5724	1705.71	9.23097
KEKDEFZTZT1-2	2012-08-11	54.296	46512.7	1.27944	9.84211	0.896108	4.08763	1.44828	0.291782	1.13776	0.785596	1650.43	16.5669	1651.84	11.8157	1653.61	16.6054	1653.61	16.6054	99.8072	1706.39	13.2058
KEKDEFZTZT1-8	2012-08-11	95.8427	61314	0.826304	9.84117	0.465342	3.98367	1.13261	0.284334	1.0326	0.911699	1613.15	14.7368	1630.87	9.19298	1653.79	8.62358	1653.79	8.62358	97.5427	1707.53	11.7187
KEKDEFQTZT-1-42	2012-08-11	79.0933	62980.7	1.04529	9.84047	0.909544	4.06791	1.90861	0.290326	1.67795	0.879149	1643.16	24.3381	1647.89	15.5569	1653.92	16.8537	1653.92	16.8537	99.349	1718.04	16.6566
KEKDEFQTZT-1-54	2012-08-11	89.564	31175.2	1.11531	9.83972	0.911795	3.53046	1.79585	0.251949	1.54717	0.861521	1448.52	20.0716	1534.06	14.2108	1654.06	16.8951	1654.06	16.8951	87.5734	1723.08	12.4717
KEKDEFQTZT-1-99	2012-08-11	55.7751	49001.1	1.22917	9.83888	1.37134	4.13086	1.98715	0.294771	1.43812	0.723709	1665.33	21.1061	1660.43	16.2461	1654.22	25.4114	1654.22	25.4114	100.671	1727.3	11.0643
KEKDEFQTZT-1-96	2012-08-11	39.692	78280.5	1.24745	9.83828	1.13279	3.99433	5.84434	0.285011	5.7335	0.981036	1616.55	81.9817	1633.04	47.4951	1654.34	20.99	1654.34	20.99	97.716	1730.96	22.5596
KEKDEFQTZT-1-4	2012-08-11	108.684	158250	1.69682	9.83502	0.596458	4.22732	2.75624	0.301536	2.69093	0.976304	1698.92	40.1891	1679.34	22.6362	1654.95	11.0501	1654.95	11.0501	102.657	1733.68	19.4819
KEKDEFQTZT-1-30	2012-08-11	128.599	193138	1.44488	9.82798	0.673658	4.13803	2.50671	0.294955	2.41449	0.963212	1666.24	35.4528	1661.85	20.5017	1656.28	12.4785	1656.28	12.4785	100.602	1735.15	22.1511
KEKDEFQTZT-1-6	2012-08-11	85.3698	43111.5	1.42315	9.82575	0.862006	4.04887	1.85382	0.288535	1.64121	0.885316	1634.2	23.6912	1644.07	15.0962	1656.7	15.9671	1656.7	15.9671	98.6422	1740.9	9.24729
KEKDEFZTZT1-14	2012-08-11	54.4031	38904.4	1.16927	9.8234	1.99434	4.06893	2.32998	0.289895	1.20475	0.517063	1641.01	17.4543	1648.1	18.9931	1657.14	36.943	1657.14	36.943	99.0264	1748.75	9.65066
KEKDEFQTZT-1-8	2012-08-11	73.9883	37564.6	0.925852	9.82266	1.08548	4.10974	2.05992	0.292781	1.75071	0.849893	1655.41	25.5595	1656.24	16.8242	1657.28	20.1057	1657.28	20.1057	99.8872	1751.99	56.4927
KEKDEFQTZT-1-50	2012-08-11	63.945	55263.5	1.46391	9.82203	1.44364	4.1987	3.51433	0.299099	3.20412	0.911731	1686.84	47.5563	1673.77	28.8276	1657.4	26.7404	1657.4	26.7404	101.776	1756.44	19.2178
KEKDEFZTZT1-39	2012-08-11	69.2818	69510.1	1.25397	9.81649	0.94879	4.16974	2.45988	0.296868	2.26954	0.922622	1675.76	33.491	1668.09	20.1485	1658.44	17.5709	1658.44	17.5709	101.044	1792.92	4.02792
KEKDEFZTZT1-31	2012-08-11	111.46	97225.6	1.21641	9.81537	0.381469	4.08871	0.612681	0.291066	0.479437	0.782523	1646.85	6.96776	1652.05	4.99858	1658.66	7.06316	1658.66	7.06316	99.2885	1866.58	36.789
KEKDEFQTZT-1-10	2012-08-11	36.6815	28331.9	0.7607	9.81471	2.60466	4.19259	4.18129	0.298441	3.27092	0.782275	1683.58	48.4655	1672.57	34.2928	1658.78	48.2411	1658.78	48.2411	101.495	2658.07	6.01544
KEKDEFQTZT-1-63	2012-08-11	90.1765	126283	1.03136	9.81284	0.997906	4.10274	1.60944	0.29199	1.26273	0.784576	1651.46	18.3966	1654.85	13.1401	1659.13	18.479	1659.13	18.479	99.5379	2684.18	2.55032
KEKDEFQTZT-1-73	2012-08-11	215.876	149044	1.15373	9.81067	0.400365	4.12795	1.13496	0.293719	1.062	0.935715	1660.09	15.5431	1659.85	9.27715	1659.54	7.41229	1659.54	7.41229	100.033	1457.33	18.4553
KEKDEFQTZT-1-110	2012-08-11	65.1867	8398.09	1.0981	9.80788	1.31831	3.27969	6.70971	0.233296	6.57893	0.980508	1351.75	80.2298	1476.25	52.2562	1660.07	24.4102	1660.07	24.4102	81.4274	1457.83	9.96949
KEKDEFQTZT-1-105	2012-08-11	112.538	214424	1.3479	9.80739	0.894453	4.15986	1.25944	0.29589	0.886651	0.704003	1670.9	13.0507	1666.15	10.3101	1660.16	16.5609	1660.16	16.5609	100.647	1462.75	15.2516
KEKDEFZTZT1-29	2012-08-11	94.9968	63335.7	1.1346	9.80655	0.899642	4.05355	2.2483	0.288304	2.06046	0.916453	1633.05	29.7247	1645.01	18.3135	1660.32	16.6566	1660.32	16.6566	98.3575	1464.68	21.4493
KEKDEFQTZT-1-95	2012-08-11	70.0355	67860.3	0.79665	9.80472	1.58166	4.17195	1.88305	0.29667	1.02187	0.542668	1674.77	15.0716	1668.53	15.4245	1660.67	29.2853	1660.67	29.2853	100.85	1466.41	7.68249
KEKDEFQTZT-1-67	2012-08-11	92.457	78039.3	0.779455	9.80414	0.791507	4.09037	1.51652	0.290851	1.29358	0.852992	1645.78	18.7891	1652.38	12.3741	1660.77	14.6534	1660.77	14.6534	99.0973	1466.59	14.8336
KEKDEFZTZT1-19	2012-08-11	93.1423	68329.1	0.693288	9.80391	0.78401	4.04939	2.02769	0.287931	1.86998	0.922226	1631.18	26.9497	1644.18	16.5128	1660.82	14.5145	1660.82	14.5145	98.2155	1467.62	7.21853
KEKDEFQTZT-1-94	2012-08-11	46.5783	38458.2	1.54331	9.80193	1.41757	4.17007	1.95408	0.296452	1.34496	0.688286	1673.69	19.8257	1668.16	16.005	1661.19	26.2447	1661.19	26.2447	100.752	1468.49	19.0666
KEKDEFQTZT-1-57	2012-08-11	70.7972	112965	0.984444	9.80096	1.02213	4.05285	2.09874	0.28809	1.83301	0.87339	1631.98	26.4283	1644.87	17.0944	1661.37	18.9222	1661.37	18.9222	98.2305	1468.51	12.5763
KEKDEFQTZT-1-77	2012-08-11	86.2196	18026	1.29523	9.80049	0.721759	3.78401	1.75357	0.268967	1.59814	0.911367	1535.55	21.8366	1589.36	14.0845	1661.46	13.3608	1661.46	13.3608	92.4217	1468.67	14.0125
KEKDEFZTZT1-18	2012-08-11	122.001	15625.6	0.970705	9.79846	0.742188	3.76105	2.49674	0.267279	2.38388	0.954796	1526.98	32.4115	1584.47	20.0293	1661.85	13.7383	1661.85	13.7383	91.8843	1469.64	11.2687
KEKDEFQTZT-1-90	2012-08-11	73.2164	45432.2	1.52212	9.7983	0.888688	4.16305	1.93944	0.295843	1.72385	0.888839	1670.66	25.3704	1666.78	15.8798	1661.88	16.4505	1661.88	16.4505	100.529	1469.93	12.17
KEKDEFQTZT-1-3	2012-08-11	51.1061	55907.3	1.29474	9.79471	1.6149	4.31857	3.46795	0.306782	3.069	0.884961	1724.85	46.4461	1696.91	28.5998	1662.56	29.8936	1662.56	29.8936	103.747	1470.71	8.84091
KEKDEFZTZT1-41	2012-08-11	54.7287	50944.7	1.3797	9.79163	0.741141	4.19456	1.58804	0.297879	1.40449	0.884415	1680.78	20.78	1672.96	13.0213	1663.14	13.7167	1663.14	13.7167	101.061	1471.09	8.37606
KEKDEFQTZT-1-53	2012-08-11	52.2196	68049.8	1.03214	9.78965	1.13105	4.19814	1.44022	0.298073	0.8916	0.619074	1681.75	13.1981	1673.66	11.811	1663.51	20.9332	1663.51	20.9332	101.096	1472.45	21.1167
KEKDEFQTZT-1-85	2012-08-11	53.8119	37158.1	1.16709	9.78856	1.51153	4.12631	1.98443	0.292941	1.28579	0.647939	1656.21	18.7798	1659.53	16.2204	1663.72	27.9755	1663.72	27.9755	99.5486	1472.75	12.7016
KEKDEFQTZT-1-28	2012-08-11	37.3654	39309	1.31595	9.78173	2.03458	4.33834	2.32325	0.307778	1.12159	0.48277	1729.77	17.0161	1700.68	19.1732	1665.01	37.6524	1665.01	37.6524	103.889	1473.34	17.9397
KEKDEFZTZT1-32	2012-08-11	90.3509	84932	0.919508	9.77866	0.783945	4.22731	2.47548	0.299807	2.34807	0.948531	1690.35	34.9138	1679.34	20.3298	1665.59	14.5045	1665.59	14.5045	101.487	1473.44	10.7117
KEKDEFQTZT-1-26	2012-08-11	85.7505	84519.7	1.06168	9.76959	0.579183	4.11973	1.36365	0.291906	1.23454	0.90532	1651.05	17.982	1658.22	11.1422	1667.3	10.7131	1667.3	10.7131	99.025	1474.88	13.9687
KEKDEFZTZT1-43	2012-08-11	40.8879	43557.7	1.4147	9.76893	1.72894	4.18405	3.30986	0.296444	2.8224	0.852724	1673.65	41.6037	1670.9	27.1313	1667.43	31.9851	1667.43	31.9851	100.373	1477.28	13.8412
KEKDEFQTZT-1-74	2012-08-11	108.064	36119.5	0.900954	9.76803	0.742044	3.7108	7.99817	0.26289	7.96367	0.995687	1504.61	106.876	1573.7	64.0573	1667.6	13.7256	1667.6	13.7256	90.2261	1477.85	10.355
KEKDEFQTZT-1-75	2012-08-11	96.5789	151088	0.949497	9.76418	1.19426	4.2725	2.36277	0.302563	2.03874	0.862857	1704.01	30.5281	1688.08	19.4433	1668.33	22.0896	1668.33	22.0896	102.139	1477.98	30.1114
KEKDEFZTZT1-37	2012-08-11	39.6164	45871.6	1.50763	9.76017	1.54992	4.09225	2.11596	0.28968	1.4405	0.680779	1639.93	20.8578	1652.76	17.2676	1669.09	28.6665	1669.09	28.6665	98.2528	1479.15	36.5549
KEKDEFQTZT-1-31	2012-08-11	61.0499	153485	0.833277	9.75816	1.07831	4.08461	1.49796	0.28908	1.03978	0.694129	1636.93	15.0313	1651.23	12.2192	1669.47	19.9418	1669.47	19.9418	98.0508	1479.55	14.1951
KEKDEFQTZT-1-61	2012-08-11	98.3545	120987	0.875358	9.75304	0.723005	4.18513	1.89763	0.296038	1.7545	0.924573	1671.63	25.8347	1671.11	15.5534	1670.44	13.3685	1670.44	13.3685	100.071	1480.25	32.9019
KEKDEFZTZT1-10	2012-08-11	157.504	143546	0.946808	9.73014	0.48765	4.20803	1.69425	0.296959	1.62255	0.957683	1676.21	23.9491	1675.59	13.9008	1674.79	9.01286	1674.79	9.01286	100.085	1480.29	35.3518
KEKDEFQTZT-1-107	2012-08-11	110.859	73067.5	0.950791	9.72678	0.516368	4.28473	2.61213	0.302267	2.56059	0.980266	1702.54	38.3137	1690.43	21.5075	1675.42	9.54288	1675.42	9.54288	101.619	1482.32	40.1775
KEKDEFQTZT-1-72	2012-08-11	137.332	142672	0.841706	9.71873	0.641095	4.28228	2.4994	0.301844	2.41578	0.966544	1700.45	36.1081	1689.96	20.5769	1676.96	11.8457	1676.96	11.8457	101.401	1488	20.8503
KEKDEFQTZT-1-44	2012-08-11	83.8911	83809.3	2.02757	9.71472	0.529515	4.24896	1.30123	0.299372	1.18862	0.913458	1688.2	17.6539	1683.54	10.6957	1677.72	9.78299	1677.72	9.78299	100.625	1488.75	8.2661
KEKDEFZTZT1-22	2012-08-11	32.7458	24706.1	1.00706	9.68657	3.32551	4.19881	4.10101	0.294982	2.39984	0.585183	1666.38	35.24	1673.79	33.6435	1683.08	61.4098	1683.08	61.4098	99.0077	1489.78	10.0641
KEKDEFQTZT-1-91	2012-08-11	36.2228	53304.4	1.02105	9.685	1.60106	4.16712	1.8364	0.292708	0.899415	0.489772	1655.05	13.1284	1667.58	15.0389	1683.38	29.5572	1683.38	29.5572	98.3171	1493.68	22.4412
KEKDEFZTZT1-17	2012-08-11	77.3086	11132	0.931647	9.68117	1.81325	4.12938	2.04566	0.289942	0.94702	0.462941	1641.24	13.7221	1660.14	16.7233	1684.11	33.4724	1684.11	33.4724	97.4546	1495.25	21.9093
KEKDEFQTZT-1-100	2012-08-11	182.837	4626.72	1.17266	9.67725	0.622263	4.03631	1.00348	0.283292	0.787245	0.784517	1607.92	11.2031	1641.54	8.16618	1684.85	11.4861	1684.85	11.4861	95.4339	1500.95	14.3512
KEKDEFZTZT1-30	2012-08-11	90.8504	79723.8	1.47536	9.6765	0.553947	4.43441	2.95254	0.311209	2.90011	0.982242	1746.66	44.3731	1718.79	24.4677	1685	10.2249	1685	10.2249	103.659	1503.92	37.0067
KEKDEFQTZT-1-69	2012-08-11	88.041	63219.6	1.11217	9.6716	0.842991	4.26741	2.25551	0.299337	2.09205	0.92753	1688.02	31.0694	1687.1	18.5562	1685.93	15.5585	1685.93	15.5585	100.124	1510.16	34.8322
KEKDEFQTZT-1-71	2012-08-11	129.142	51224.9	1.34745	9.66202	0.431225	4.18	1.21278	0.292916	1.13353	0.934651	1656.09	16.5549	1670.11	9.93742	1687.76	7.95684	1687.76	7.95684	98.1234	1530.53	14.9883
KEKDEFQTZT-1-24	2012-08-11	35.4066	1752.27	1.06791	9.65681	4.36321	4.28965	4.49953	0.300437	1.09917	0.244286	1693.48	16.37	1691.38	37.0668	1688.76	80.5305	1688.76	80.5305	100.279	1534.73	18.3537
KEKDEFQTZT-1-49	2012-08-11	94.3443	107562	1.13017	9.65314	0.694643	4.30598	1.47804	0.301467	1.30464	0.88268	1698.58	19.4812	1694.51	12.1799	1689.46	12.8147	1689.46	12.8147	100.54	1537	68.7433
KEKDEFQTZT-1-59	2012-08-11	75.3794	35760.1	0.436038	9.63844	1.19839	4.07603	3.38925	0.284933	3.17031	0.935402	1616.16	45.32	1649.52	27.641	1692.27	22.0987	1692.27	22.0987	95.5025	1547.31	60.805
KEKDEFQTZT-1-78	2012-08-11	121.925	85773.6	1.69101	9.63664	0.49564	4.31458	0.907897	0.301553	0.760669	0.837837	1699	11.361	1696.15	7.48418	1692.61	9.13979	1692.61	9.13979	100.378	1550.06	28.9603
KEKDEFZTZT1-46	2012-08-11	83.2422	64711.9	1.24598	9.62596	0.775723	4.30232	2.79096	0.300363	2.68099	0.960598	1693.11	39.9209	1693.81	22.9983	1694.66	14.2993	1694.66	14.2993	99.9085	1551.1	13.1776
KEKDEFQTZT-1-27	2012-08-11	22.9631	20961.9	0.760157	9.61563	3.34042	4.42223	4.59512	0.308403	3.15542	0.686689	1732.84	47.9468	1716.51	38.0709	1696.64	61.5795	1696.64	61.5795	102.134	1551.12	18.4628
KEKDEFQTZT-1-29	2012-08-11	83.9444	73333.2	2.56052	9.58896	0.558998	4.36814	2.00952	0.303785	1.9302	0.96053	1710.05	28.9924	1706.33	16.6048	1701.75	10.2945	1701.75	10.2945	100.488	1552.19	26.2128
KEKDEFQTZT-1-19	2012-08-11	108.357	100675	1.37484	9.56836	0.501506	4.46505	1.40648	0.309858	1.31403	0.93427	1740.01	20.0385	1724.5	11.6685	1705.71	9.23097	1705.71	9.23097	102.011	1555.97	12.5778
KEKDEFQTZT-1-66	2012-08-11	184.424	5930.5	1.59873	9.56485	0.717466	3.06191	6.26501	0.212407	6.22379	0.993421	1241.63	70.2929	1423.22	47.9885	1706.39	13.2058	1706.39	13.2058	72.7638	1558.07	17.3623
KEKDEFQTZT-1-15	2012-08-11	178.08	16873.7	1.11295	9.55892	0.63678	3.75261	4.91653	0.26016	4.87512	0.991577	1490.66	64.8833	1582.67	39.4374	1707.53	11.7187	1707.53	11.7187	87.2994	1558.56	18.9535
KEKDEFZTZT1-16	2012-08-11	56.4224	83229.2	0.899797	9.50442	0.906247	4.4168	3.47476	0.304462	3.3545	0.965391	1713.4	50.4727	1715.5	28.7764	1718.04	16.6566	1718.04	16.6566	99.7294	1560.67	20.4999
KEKDEFZTZT1-47	2012-08-11	114.432	122459	2.48713	9.47841	0.678923	4.52605	1.85585	0.311138	1.7272	0.930682	1746.31	26.4222	1735.77	15.4351	1723.08	12.4717	1723.08	12.4717	101.348	1562.83	11.3415
KEKDEFQTZT-1-103	2012-08-11	108.053	200162	3.97417	9.45668	0.60263	4.53557	0.977615	0.311078	0.769785	0.787411	1746.01	11.7741	1737.52	8.13348	1727.3	11.0643	1727.3	11.0643	101.083	1563.95	9.26765
KEKDEFQTZT-1-20	2012-08-11	76.9427	59554.7	0.9361	9.43783	1.22935	4.49761	2.02492	0.30786	1.60904	0.794617	1730.17	24.4162	1730.53	16.8223	1730.96	22.5596	1730.96	22.5596	99.9542	1567.48	55.4624
KEKDEFZTZT1-23	2012-08-11	83.6481	38435.5	1.23163	9.42382	1.06203	4.14032	1.83926	0.282983	1.50166	0.816447	1606.37	21.3516	1662.3	15.0435	1733.68	19.4819	1733.68	19.4819	92.6564	1571.98	20.6009
KEKDEFQTZT-1-11	2012-08-11	78.2451	115277	0.939289	9.4163	1.20773	4.53886	1.67912	0.309974	1.16655	0.694739	1740.58	17.7945	1738.12	13.9722	1735.15	22.1511	1735.15	22.1511	100.313	1577.66	33.7505
KEKDEFZTZT1-12	2012-08-11	190.381	77666.3	1.72604	9.3868	0.504619	4.40303	0.96139	0.299756	0.818309	0.851173	1690.1	12.1658	1712.91	7.95522	1740.9	9.24729	1740.9	9.24729	97.0817	1585.99	14.4427
KEKDEFZTZT1-25	2012-08-11	166.973	24414.8	1.29965	9.34664	0.52714	4.38175	1.66363	0.297031	1.57791	0.948472	1676.57	23.2944	1708.9	13.7543	1748.75	9.65066	1748.75	9.65066	95.8723	1595.61	9.31778
KEKDEFZTZT1-50	2012-08-11	82.1939	10257.1	0.669919	9.33013	3.086	4.48387	3.55024	0.303417	1.75522	0.494396	1708.23	26.3396	1727.99	29.4833	1751.99	56.4927	1751.99	56.4927	97.5023	1598.41	13.6318
KEKDEFQTZT-1-87	2012-08-11	101.497	120241	1.00156	9.30744	1.05061	4.64437	2.49266	0.313513	2.26043	0.906837	1757.97	34.7805	1757.28	20.8288	1756.44	19.2178	1756.44	19.2178	100.087	1598.43	12.3075
KEKDEFZTZT1-27	2012-08-11	254.76	134176	2.06216	9.12325	0.221181	5.00083	1.0657	0.330895	1.04249	0.978225	1842.72	16.7086	1819.46	9.01792	1792.92	4.02792	1792.92	4.02792	102.777	1602.87	22.2517
KEKDEFZTZT1-28	2012-08-11	34.3149	48334.1	2.13912	8.75996	2.03836	5.38769	2.71484	0.342297	1.79317	0.660506	1897.71	29.478	1882.9	23.2546	1866.58	36.789	1866.58	36.789	101.668	1603.34	20.3402
KEKDEFQTZT-1-25	2012-08-11	56.0347	84162.4	1.2255	5.53811	0.362838	12.6802	1.21437	0.509315	1.15889	0.95432	2653.71	25.2099	2656.19	11.4296	2658.07	6.01544	2658.07	6.01544	99.8358	1604.3	8.80689
KEKDEFZTZT1-13	2012-08-11	161.296	187302	1.19168	5.45148	0.154215	12.3648	2.434	0.488877	2.42911	0.997991	2565.82	51.4181	2632.51	22.8691	2684.18	2.55032	2684.18	2.55032	95.5905	1606.36	44.1174
																					1607.1	26.2516
Sample BJ-002-08: Blackjack Formation quartzite, Arizona (UTM Zone 12, E 530069, N 3729567, NAD27) - sample originally from Doe et al. (2012), reanalyzed Nov 2011																					1608.34	29.9955
BJ-002-08-14	2011-11-23	132.713	144205	0.849346	10.9271	0.970487	3.22895	1.45511	0.255897	1.0842	0.745101	1468.82	14.241	1464.14	11.2816	1457.33	18.4553	1457.33	18.4553	100.788	1609.42	16.3815
BJ-002-08-55	2011-11-23	420.88	8690.35	0.9348	10.9243	0.524296	2.9264	2.99815	0.231859	2.95196	0.984591	1344.24	35.8176	1388.76	22.6932	1457.83	9.96949	1457.83	9.96949	92.2081	1609.53	12.9689
BJ-002-08-75	2011-11-23	157.867	108074	0.724133	10.896	0.802606	3.37361	1.83928	0.266601	1.65493	0.899768	1523.53	22.4554	1498.29	14.4066	1462.75	15.2516	1462.75	15.2516	104.155	1609.6	14.8537
BJ-002-08-114	2011-11-23	88.2116	66361.3	0.832696	10.8849	1.12903	3.33394	1.73785	0.263198	1.32114	0.760215	1506.18	17.7451	1489.04	13.5751	1464.68	21.4493	1464.68	21.4493	102.833	1609.78	21.7392
BJ-002-08-32	2011-11-23	179.109	130246	1.01644	10.8751	0.40449	3.35832	1.76894	0.264881	1.72207	0.973506	1514.77	23.2473	1494.73	13.8412	1466.41	7.68249	1466.41	7.68249	103.298	1609.85	12.7744
BJ-002-08-42	2011-11-23	363.159	6432.79	0.732366	10.874	0.781015	2.69493	1.58753	0.212538	1.38213	0.870614	1242.33	15.6174	1327.07	11.7575	1466.59	14.8336	1466.59	14.8336	84.7086	1613.22	12.8526
BJ-002-08-56	2011-11-23	506.731	18257.8	0.985914	10.8681	0.380124	2.91592	1.65078	0.229842	1.60642	0.973127	1333.67	19.3534	1386.05	12.4819	1467.62	7.21853	1467.62	7.21853	90.8731	1614.1	20.9287
BJ-002-08-110	2011-11-23	130.599	82652.5	1.16701	10.8631	1.00413	3.25169	2.63595	0.256191	2.4372	0.924601	1470.32	32.0421	1469.58	20.4726	1468.49	19.0666	1468.49	19.0666	100.125	1615.76	20.2532
BJ-002-08-87	2011-11-23	200.298	51724.3	0.697455	10.8631	0.662335	3.33055	1.71374	0.262401	1.58057	0.922295	1502.12	21.1789	1488.24	13.3836	1468.51	12.5763	1468.51	12.5763	102.289	1615.76	54.7334
BJ-002-08-43	2011-11-23	231.131	201561	0.814559	10.8621	0.737988	3.28532	1.75969	0.258816	1.59746	0.907808	1483.78	21.1728	1477.58	13.6989	1468.67	14.0125	1468.67	14.0125	101.029	1616.09	16.2054
BJ-002-08-95	2011-11-23	160.368	66660.3	1.03815	10.8566	0.59356	3.23688	1.38334	0.254869	1.24953	0.903268	1463.54	16.36	1466.04	10.7314	1469.64	11.2687	1469.64	11.2687	99.5848	1620.22	25.5967
BJ-002-08-38	2011-11-23	283.79	141747	0.669967	10.8549	0.64106	3.27916	1.15007	0.258159	0.954827	0.830237	1480.42	12.6298	1476.12	8.94887	1469.93	12.17	1469.93	12.17	100.713	1621.8	14.6028
BJ-002-08-76	2011-11-23	131.173	110409	1.13188	10.8505	0.46575	3.23002	1.08647	0.254186	0.981575	0.903455	1460.03	12.8243	1464.39	8.42402	1470.71	8.84091	1470.71	8.84091	99.274	1622.48	14.65
BJ-002-08-107	2011-11-23	195.767	20910.7	1.37422	10.8483	0.441284	3.32549	1.53856	0.261646	1.47392	0.957986	1498.26	19.7047	1487.05	12.0111	1471.09	8.37606	1471.09	8.37606	101.847	1622.65	12.6898
BJ-002-08-22	2011-11-23	168.953	183533	0.713123	10.8405	1.11269	3.32693	1.97865	0.261572	1.63615	0.826901	1497.88	21.8686	1487.39	15.4488	1472.45	21.1167	1472.45	21.1167	101.727	1622.8	13.7892
BJ-002-08-40	2011-11-23	203.626	67016.3	1.06941	10.8388	0.669313	3.39311	2.04361	0.266734	1.9309	0.944846	1524.2	26.2104	1502.81	16.0284	1472.75	12.7016	1472.75	12.7016	103.494	1622.88	14.6102
BJ-002-08-69	2011-11-23	126.815	52337.4	0.997263	10.8354	0.945405	3.18872	1.49703	0.250588	1.16073	0.775358	1441.51	14.9933	1454.43	11.5721	1473.34	17.9397	1473.34	17.9397	97.8394	1624	23.3799
BJ-002-08-45	2011-11-23	259.703	75807.2	1.09066	10.8349	0.564509	3.35962	1.82869	0.264005	1.73937	0.951161	1510.3	23.4194	1495.03	14.31	1473.44	10.7117	1473.44	10.7117	102.502	1624.9	21.4916
BJ-002-08-96	2011-11-23	140.714	140164	0.909897	10.8266	0.736296	3.30422	2.03372	0.259454	1.89575	0.932161	1487.05	25.1756	1482.05	15.8537	1474.88	13.9687	1474.88	13.9687	100.825	1625.35	7.08964
BJ-002-08-60	2011-11-23	210.914	12543.4	0.98121	10.8129	0.729809	3.24454	1.64622	0.254446	1.47561	0.896361	1461.36	19.2945	1467.87	12.778	1477.28	13.8412	1477.28	13.8412	98.9222	1625.91	13.8416
BJ-002-08-37	2011-11-23	274.853	6902.93	0.913011	10.8097	0.546034	2.75296	2.24089	0.21583	2.17335	0.969859	1259.8	24.8708	1342.89	16.6923	1477.85	10.355	1477.85	10.355	85.246	1626.76	4.18166
BJ-002-08-26	2011-11-23	108.531	53068.5	1.34236	10.809	1.58776	3.2479	2.37294	0.254617	1.76348	0.743162	1462.24	23.071	1468.68	18.4244	1477.98	30.1114	1477.98	30.1114	98.9353	1627.03	7.86099
BJ-002-08-8	2011-11-23	81.347	48325.1	1.96571	10.8023	1.92778	3.30005	2.1593	0.258544	0.972748	0.450493	1482.39	12.882	1481.07	16.8279	1479.15	36.5549	1479.15	36.5549	100.219	1627.29	6.64777
BJ-002-08-33	2011-11-23	167.762	86090.4	0.786453	10.8	0.748697	3.30265	1.54342	0.258693	1.34967	0.874465	1483.15	17.8818	1481.68	12.0299	1479.55	14.1951	1479.55	14.1951	100.243	1627.65	18.3703
BJ-002-08-68	2011-11-23	61.318	52256.3	1.07206	10.796	1.73541	3.21996	3.21194	0.252124	2.70276	0.841472	1449.42	35.083	1461.97	24.8901	1480.25	32.9019	1480.25	32.9019	97.9174	1628.65	11.1728
BJ-002-08-113	2011-11-23	84.728	34719.8	0.923184	10.7958	1.86462	3.31287	2.32159	0.259393	1.3831	0.595756	1486.73	18.3641	1484.09	18.1092	1480.29	35.3518	1480.29	35.3518	100.436	1629.04	18.6582
BJ-002-08-85	2011-11-23	72.0332	31654.5	0.851975	10.7842	2.11976	3.33619	2.44508	0.260939	1.21863	0.4984	1494.64	16.2568	1489.56	19.1037	1482.32	40.1775	1482.32	40.1775	100.831	1630.21	12.4201
BJ-002-08-29	2011-11-23	176.795	45298.6	1.14888	10.7519	1.10094	3.31045	2.19394	0.25815	1.89771	0.864978	1480.37	25.1009	1483.52	17.1104	1488	20.8503	1488	20.8503	99.4871	1630.23	22.0222
BJ-002-08-16	2011-11-23	195.747	46186.3	0.669592	10.7477	0.436523	3.34583	1.99349	0.260806	1.94511	0.975731	1493.97	25.9379	1491.82	15.5851	1488.75	8.2661	1488.75	8.2661	100.35	1630.61	23.3264
BJ-002-08-93	2011-11-23	309.414	17879.5	1.91948	10.7418	0.531547	3.16687	2.06422	0.246722	1.99461	0.966277	1421.55	25.4459	1449.12	15.931	1489.78	10.0641	1489.78	10.0641	95.4199	1632.07	19.8451
BJ-002-08-2	2011-11-23	91.9366	55455.7	0.968272	10.7198	1.18584	3.29767	1.74327	0.256384	1.2778	0.73299	1471.32	16.8093	1480.5	13.5829	1493.68	22.4412	1493.68	22.4412	98.503	1636.14	21.1906
BJ-002-08-6	2011-11-23	139.733	86962.5	1.05099	10.7108	1.15797	3.36235	1.6249	0.261195	1.13991	0.701526	1495.95	15.2185	1495.67	12.7175	1495.25	21.9093	1495.25	21.9093	100.047	1640.9	20.3977
BJ-002-08-47	2011-11-23	214.092	179284	1.40887	10.6786	0.759098	3.46255	1.51581	0.26817	1.31204	0.86557	1531.51	17.8854	1518.73	11.9428	1500.95	14.3512	1500.95	14.3512	102.036	1643.15	24.8763
BJ-002-08-17	2011-11-23	63.2444	77514.8	1.52268	10.6619	1.95814	3.39241	2.1693	0.262326	0.933567	0.430354	1501.73	12.5064	1502.64	17.0136	1503.92	37.0067	1503.92	37.0067	99.8545	1648.06	9.13248
BJ-002-08-39	2011-11-23	132.95	49201.4	1.3591	10.6267	1.84464	3.54903	2.09304	0.273531	0.989005	0.47252	1558.7	13.6935	1538.22	16.582	1510.16	34.8322	1510.16	34.8322	103.214	1649.02	14.0858
BJ-002-08-105	2011-11-23	132.988	95654.5	0.995009	10.5125	0.795995	3.52984	1.25851	0.269128	0.974796	0.774567	1536.37	13.3256	1533.92	9.95797	1530.53	14.9883	1530.53	14.9883	100.382	1649.51	5.74841
BJ-002-08-128	2011-11-23	144.319	10518.4	1.63098	10.4891	0.975238	3.30752	5.91727	0.251616	5.83635	0.986325	1446.81	75.6393	1482.83	46.1664	1534.73	18.3537	1534.73	18.3537	94.2713	1652.96	14.5948
BJ-002-08-4	2011-11-23	120.441	2316.45	0.694919	10.4764	3.65256	3.39663	3.99544	0.258084	1.61936	0.405303	1480.03	21.4148	1503.62	31.3517	1537	68.7433	1537	68.7433	96.2936	1653.56	27.77
BJ-002-08-84	2011-11-23	48.798	29319.4	1.0199	10.4191	3.23542	3.69071	3.7035	0.278895	1.80221	0.486624	1585.8	25.3356	1569.36	29.5962	1547.31	60.805	1547.31	60.805	102.487	1655.78	10.232
BJ-002-08-73	2011-11-23	69.6741	29422.5	1.10995	10.4039	1.54185	3.63658	2.38358	0.274403	1.81773	0.762607	1563.11	25.2308	1557.57	18.9848	1550.06	28.9603	1550.06	28.9603	100.842	1660.54	10.6736
BJ-002-08-111	2011-11-23	164.025	62455.3	1.23701	10.3981	0.701665	3.69633	1.5836	0.278757	1.41967	0.896481	1585.1	19.9501	1570.58	12.6564	1551.1	13.1776	1551.1	13.1776	102.192	1663.16	50.2979
BJ-002-08-72	2011-11-23	272.646	15729	0.849954	10.398	0.983077	3.46661	2.20446	0.26143	1.97312	0.895058	1497.15	26.3612	1519.65	17.374	1551.12	18.4628	1551.12	18.4628	96.5206	1676	27.1722
BJ-002-08-12	2011-11-23	89.1982	64029.6	1.08455	10.3921	1.39598	3.65099	1.9095	0.275178	1.30286	0.682303	1567.03	18.1242	1560.73	15.2212	1552.19	26.2128	1552.19	26.2128	100.957	1685.25	50.314
BJ-002-08-34	2011-11-23	242.764	69629.6	1.54097	10.3712	0.670159	3.63401	1.15932	0.273347	0.945995	0.815992	1557.77	13.0911	1557.01	9.23153	1555.97	12.5778	1555.97	12.5778	100.116	1685.31	19.7335
BJ-002-08-10	2011-11-23	195.326	20597.5	3.2221	10.3596	0.925414	3.43381	1.36081	0.257999	0.9977	0.733168	1479.6	13.1904	1512.17	10.7014	1558.07	17.3623	1558.07	17.3623	94.9637	1696.04	11.0121
BJ-002-08-100	2011-11-23	151.083	145196	0.889004	10.3569	1.01028	3.5746	2.17028	0.268507	1.9208	0.885045	1533.22	26.2099	1543.91	17.2211	1558.56	18.9535	1558.56	18.9535	98.3742	1709.56	12.7138
BJ-002-08-74	2011-11-23	125.738	22104.7	1.3575	10.3453	1.093	3.69959	1.94658	0.277584	1.61075	0.82748	1579.18	22.5608	1571.28	15.5607	1560.67	20.4999	1560.67	20.4999	101.186	1717.8	66.5955
BJ-002-08-1	2011-11-23	147.004	62580.1	1.60954	10.3333	0.604921	3.72782	3.10316	0.279379	3.04362	0.980816	1588.24	42.846	1577.36	24.8493	1562.83	11.3415	1562.83	11.3415	101.626	1723.94	52.5883
BJ-002-08-61	2011-11-23	126.594	42946.1	0.836229	10.3272	0.494311	3.70597	2.06383	0.277576	2.00376	0.970894	1579.14	28.0648	1572.66	16.5042	1563.95	9.26765	1563.95	9.26765	100.971	1729.43	18.8126
BJ-002-08-50	2011-11-23	66.4941	19149.2	0.920315	10.3077	2.95919	3.45964	4.05446	0.258638	2.77161	0.683595	1482.87	36.7152	1518.07	31.9475	1567.48	55.4624	1567.48	55.4624	94.602	1729.71	7.4422
BJ-002-08-78	2011-11-23	140.236	69585.2	1.75737	10.283	1.10001	3.60161	1.56607	0.268605	1.11469	0.71178	1533.72	15.2147	1549.89	12.4465	1571.98	20.6009	1571.98	20.6009	97.5659	1739.01	7.1742
BJ-002-08-5	2011-11-23	67.5628	56650.9	1.36	10.2518	1.80334	3.75552	2.69505	0.279236	2.00281	0.743145	1587.51	28.1826	1583.29	21.6139	1577.66	33.7505	1577.66	33.7505	100.624	1746.43	4.38491
BJ-002-08-127	2011-11-23	158.888	85029.6	1.33087	10.2063	0.77263	3.86281	1.82666	0.285937	1.65521	0.906141	1621.19	23.7259	1605.95	14.7344	1585.99	14.4427	1585.99	14.4427	102.22	1764.7	8.59469
BJ-002-08-89	2011-11-23	369.499	27788.3	3.17806	10.1539	0.499041	3.86037	1.30407	0.284289	1.20481	0.923881	1612.93	17.1923	1605.44	10.5173	1595.61	9.31778	1595.61	9.31778	101.085	1768.22	8.752
BJ-002-08-13	2011-11-23	70.234	51064.5	1.15879	10.1387	0.730351	3.75549	1.68502	0.27615	1.51852	0.901184	1571.95	21.1828	1583.29	13.5124	1598.41	13.6318	1598.41	13.6318	98.3443	1789.67	8.55119
BJ-002-08-90	2011-11-23	285.886	44216.4	5.21328	10.1386	0.659404	3.88925	1.09072	0.285983	0.868829	0.796562	1621.43	12.4554	1611.45	8.81006	1598.43	12.3075	1598.43	12.3075	101.439	1790.34	10.6377
BJ-002-08-109	2011-11-23	98.574	42473.4	0.995997	10.1144	1.19294	4.0251	2.16996	0.295268	1.81263	0.835329	1667.8	26.6371	1639.28	17.6505	1602.87	22.2517	1602.87	22.2517	104.051	1801.4	11.3695
BJ-002-08-64	2011-11-23	96.348	71389.6	1.38262	10.1119	1.09054	3.95636	1.90072	0.290153	1.55674	0.81903	1642.29	22.5696	1625.29	15.4068	1603.34	20.3402	1603.34	20.3402	102.43	1802.34	5.27802
BJ-002-08-15	2011-11-23	155.715	108010	0.843638	10.1067	0.472213	3.77834	2.25101	0.276955	2.20092	0.977749	1576.01	30.7723	1588.15	18.075	1604.3	8.80689	1604.3	8.80689	98.2362	1856.86	4.45742
BJ-002-08-71	2011-11-23	39.0426	38242.7	0.779166	10.0955	2.366	3.96005	3.09826	0.289953	2.00031	0.645626	1641.29	28.985	1626.05	25.1218	1606.36	44.1174	1606.36	44.1174	102.174	3257.21	3.06699
BJ-002-08-11	2011-11-23	117.249	41201.8	1.41454	10.0915	1.40811	3.73484	1.97845	0.273356	1.38978	0.70246	1557.81	19.2329	1578.87	15.8474	1607.1	26.2516	1607.1	26.2516	96.9332	1455.53	60.779
BJ-002-08-7	2011-11-23	60.7882	62214.6	1.16619	10.0848	1.60915	3.85443	2.30355	0.281921	1.64833	0.715561	1601.03	23.3685	1604.19	18.5737	1608.34	29.9955	1608.34	29.9955	99.5459	1472.97	21.2233
BJ-002-08-99	2011-11-23	210.873	198050	1.00413	10.079	0.879011	3.91563	1.86166	0.286231	1.64107	0.88151	1622.67	23.5421	1616.92	15.0586	1609.42	16.3815	1609.42	16.3815	100.823	1473.67	21.654
BJ-002-08-67	2011-11-23	116.62	134815	1.10941	10.0784	0.695929	3.8594	1.42033	0.282105	1.23816	0.871736	1601.95	17.5623	1605.23	11.4545	1609.53	12.9689	1609.53	12.9689	99.5294	1475.2	37.9017
BJ-002-08-20	2011-11-23	107.822	34096.9	0.988248	10.078	0.79706	4.00401	3.67711	0.292664	3.58969	0.976224	1654.83	52.3923	1635.01	29.884	1609.6	14.8537	1609.6	14.8537	102.81	1477.55	13.2847
BJ-002-08-97	2011-11-23	100.843	92784.3	1.37555	10.077	1.16651	4.03726	1.97972	0.295065	1.59954	0.807965	1666.79	23.4932	1641.73	16.1124	1609.78	21.7392	1609.78	21.7392	103.541	1480.85	11.068
BJ-002-08-24	2011-11-23	103.07	40036.5	0.857145	10.0767	0.685524	3.82318	1.83371	0.279409	1.70075	0.927491	1588.39	23.9438	1597.64	14.7599	1609.85	12.7744	1609.85	12.7744	98.6668	1484.16	14.3011
BJ-002-08-3	2011-11-23	152.409	157851	1.40455	10.0584	0.690021	3.85008	1.66402	0.280865	1.51421	0.909972	1595.72	21.4043	1603.28	13.4133	1613.22	12.8526	1613.22	12.8526	98.9149	1484.54	14.2559
BJ-002-08-19	2011-11-23	91.1674	104776	1.04261	10.0537	1.12365	3.91599	2.04628	0.285539	1.71017	0.835744	1619.2	24.4872	1616.99	16.5525	1614.1	20.9287	1614.1	20.9287	100.316	1485.41	12.7965
BJ-002-08-53	2011-11-23	91.9272	40944.7	1.50318	10.0448	1.08762	3.97845	1.42041	0.289836	0.913592	0.643189	1640.71	13.2339	1629.81	11.5261	1615.76	20.2532	1615.76	20.2532	101.544	1487.56	21.1076
BJ-002-08-79	2011-11-23	38.7598	23144.6	1.20297	10.0448	2.93872	4.01674	4.09086	0.292626	2.84588	0.695669	1654.64	41.5318	1637.59	33.2699	1615.76	54.7334	1615.76	54.7334	102.406	1491.08	12.2202
BJ-002-08-115	2011-11-23	103.646	18524.8	0.692639	10.0429	0.870313	3.9812	2.2995	0.289984	2.12844	0.92561	1641.45	30.8441	1630.37	18.6635	1616.09	16.2054	1616.09	16.2054	101.569	1495.58	9.45073
BJ-002-08-54	2011-11-23	110.029	113617	1.20397	10.0207	1.37532	3.9371	1.75046	0.286137	1.08288	0.618623	1622.2	15.5305	1621.34	14.1747	1620.22	25.5967	1620.22	25.5967	100.122	1496.17	20.0493
BJ-002-08-59	2011-11-23	248.579	41728.1	3.34655	10.0122	0.784838	3.72853	2.24723	0.270747	2.10572	0.937031	1544.6	28.9219	1577.51	17.9943	1621.8	14.6028	1621.8	14.6028	95.2395	1497.33	10.2044
BJ-002-08-77	2011-11-23	147.918	121670	1.16	10.0085	0.787442	3.87769	2.04558	0.281476	1.88795	0.922939	1598.79	26.7326	1609.05	16.5137	1622.48	14.65	1622.48	14.65	98.5399	1497.39	22.5073
BJ-002-08-125	2011-11-23	154.933	116782	1.40086	10.0076	0.682108	3.91417	1.61568	0.284099	1.46463	0.906512	1611.97	20.8891	1616.61	13.0677	1622.65	12.6898	1622.65	12.6898	99.3422	1498.25	12.5312
BJ-002-08-118	2011-11-23	212.411	91328.3	1.16257	10.0068	0.74121	3.915	1.21334	0.284135	0.960631	0.791722	1612.16	13.7022	1616.79	9.81377	1622.8	13.7892	1622.8	13.7892	99.3439	1502.83	12.0231
BJ-002-08-51	2011-11-23	197.874	123965	0.941924	10.0064	0.785341	4.03723	1.36918	0.292994	1.12156	0.819146	1656.47	16.3834	1641.73	11.1429	1622.88	14.6102	1622.88	14.6102	102.07	1502.96	9.23234
BJ-002-08-121	2011-11-23	84.7793	114020	1.30656	10.0004	1.25684	4.02864	3.2991	0.292195	3.05031	0.92459	1652.49	44.4646	1640	26.8432	1624	23.3799	1624	23.3799	101.755	1504.42	13.8132
BJ-002-08-120	2011-11-23	87.4521	42204	0.965043	9.99549	1.15548	3.9547	1.65941	0.286692	1.19101	0.717732	1624.98	17.1071	1624.95	13.4494	1624.9	21.4916	1624.9	21.4916	100.004	1509.14	14.6605
BJ-002-08-91	2011-11-23	151.181	230560	1.12662	9.9931	0.38126	4.0562	1.35914	0.29398	1.30457	0.959849	1661.39	19.1063	1645.55	11.0715	1625.35	7.08964	1625.35	7.08964	102.217	1512.66	14.5228
BJ-002-08-18	2011-11-23	151.742	48163.9	1.31628	9.99009	0.744324	3.9093	2.71888	0.283248	2.61501	0.961798	1607.7	37.2095	1615.61	21.9871	1625.91	13.8416	1625.91	13.8416	98.8801	1517.05	20.4033
BJ-002-08-88	2011-11-23	355.118	103449	2.13368	9.9855	0.224866	4.05124	1.48975	0.293398	1.47268	0.988543	1658.49	21.5355	1644.55	12.1326	1626.76	4.18166	1626.76	4.18166	101.95	1527.75	24.2429
BJ-002-08-94	2011-11-23	224.009	114336	0.898456	9.98407	0.422823	3.90087	1.24546	0.282467	1.17149	0.940609	1603.77	16.6334	1613.86	10.0661	1627.03	7.86099	1627.03	7.86099	98.5706	1527.92	6.93622
BJ-002-08-81	2011-11-23	217.773	151023	1.11194	9.98267	0.357504	4.05596	1.21427	0.293656	1.16045	0.955676	1659.77	16.981	1645.5	9.89117	1627.29	6.64777	1627.29	6.64777	101.996	1529.15	41.9303
BJ-002-08-65	2011-11-23	125.123	122269	0.675832	9.98074	0.988035	3.95518	1.58234	0.286304	1.23595	0.781092	1623.03	17.7339	1625.05	12.825	1627.65	18.3703	1627.65	18.3703	99.7164	1531.27	24.7449
BJ-002-08-31	2011-11-23	113.676	43535	0.72611	9.97539	0.601044	3.7965	2.73695	0.27467	2.67014	0.975589	1564.47	37.0912	1592	22.0001	1628.65	11.1728	1628.65	11.1728	96.0592	1536.96	27.8498
BJ-002-08-57	2011-11-23	79.9565	48441.1	1.19596	9.97328	1.0037	4.02495	2.95917	0.291137	2.78375	0.94072	1647.21	40.4649	1639.25	24.0718	1629.04	18.6582	1629.04	18.6582	101.115	1549.32	21.3701
BJ-002-08-129	2011-11-23	83.5397	60480.4	0.638049	9.96699	0.668267	3.90481	2.10487	0.282269	1.99597	0.948263	1602.78	28.3243	1614.68	17.0167	1630.21	12.4201	1630.21	12.4201	98.3171	1557.18	13.4844
BJ-002-08-70	2011-11-23	83.1725	56400.4	1.5244	9.9669	1.18481	3.99369	1.58596	0.288691	1.05428	0.664754	1634.98	15.225	1632.91	12.8795	1630.23	22.0222	1630.23	22.0222	100.292	1557.59	53.8771
BJ-002-08-92	2011-11-23	98.6749	66580.2	1.58446	9.96484	1.25503	3.87103	1.66711	0.279766	1.09734	0.658226	1590.19	15.4641	1607.66	13.4532	1630.61	23.3264	1630.61	23.3264	97.5207	1559.26	14.9174
BJ-002-08-21	2011-11-23	125.602	107066	1.13443	9.95704	1.06795	3.95393	1.97607	0.285534	1.66262	0.841379	1619.17	23.8061	1624.8	16.0157	1632.07	19.8451	1632.07	19.8451	99.2097	1559.64	8.21915
BJ-002-08-62	2011-11-23	93.0955	104587	2.05296	9.93526	1.14094	3.89123	1.95804	0.280392	1.59128	0.812689	1593.34	22.4641	1611.86	15.8181	1636.14	21.1906	1636.14	21.1906	97.3839	1562.12	24.3265
BJ-002-08-112	2011-11-23	232.23	9126.22	1.18791	9.90982	1.09884	3.84462	2.80611	0.276324	2.58201	0.92014	1572.82	36.0362	1602.14	22.6152	1640.9	20.3977	1640.9	20.3977	95.8514	1563.17	23.7802
BJ-002-08-35	2011-11-23	61.3791	61817.9	0.8564	9.89782	1.34066	4.17827	1.81386	0.29994	1.22176	0.673573	1691.01	18.1726	1669.77	14.8619	1643.15	24.8763	1643.15	24.8763	102.913	1563.82	16.0108
BJ-002-08-46	2011-11-23	300.667	53838.6	0.769592	9.87165	0.49244	4.13539	1.22309	0.296077	1.11958	0.915368	1671.83	16.4872	1661.32	10.0011	1648.06	9.13248	1648.06	9.13248	101.442	1565.56	14.473
BJ-002-08-116	2011-11-23	117.016	87034.9	1.61856	9.86655	0.75971	4.20164	4.03756	0.300665	3.96544	0.982138	1694.61	59.0935	1674.34	33.1269	1649.02	14.0858	1649.02	14.0858	102.765	1565.89	17.0768
BJ-002-08-124	2011-11-23	138.233	39854	2.71007	9.86391	0.310024	3.93845	5.32605	0.281756	5.31702	0.998304	1600.2	75.3484	1621.62	43.155	1649.51	5.74841	1649.51	5.74841	97.0105	1571.74	23.7266
BJ-002-08-101	2011-11-23	167.869	148757	1.2617	9.84556	0.787558	4.16294	1.29046	0.297262	1.02228	0.792178	1677.72	15.1008	1666.76	10.5656	1652.96	14.5948	1652.96	14.5948	101.497	1572.03	23.2066
BJ-002-08-119	2011-11-23	79.7562	69708.6	1.40031	9.84239	1.49848	4.14681	2.16916	0.296015	1.56838	0.723037	1671.52	23.0928	1663.58	17.7477	1653.56	27.77	1653.56	27.77	101.086	1573.4	60.9986
BJ-002-08-49	2011-11-23	159.639	282097	0.954728	9.8306	0.552364	4.13017	1.84828	0.294473	1.76381	0.954299	1663.85	25.8658	1660.29	15.11	1655.78	10.232	1655.78	10.232	100.487	1574.72	7.42272
BJ-002-08-83	2011-11-23	158.236	186031	0.890116	9.80539	0.57655	4.08715	1.51281	0.290659	1.39864	0.924529	1644.82	20.3048	1651.74	12.3419	1660.54	10.6736	1660.54	10.6736	99.0536	1576.23	18.9973
BJ-002-08-103	2011-11-23	36.0225	11118.8	0.630851	9.7915	2.71718	3.90133	4.59086	0.277052	3.7004	0.806037	1576.5	51.7522	1613.96	37.1207	1663.16	50.2979	1663.16	50.2979	94.7893	1578.66	19.3561
BJ-002-08-122	2011-11-23	96.9305	45203.7	1.04719	9.72375	1.47052	4.27543	1.75207	0.301517	0.952531	0.54366	1698.83	14.2253	1688.64	14.4189	1676	27.1722	1676	27.1722	101.362	1580.42	24.4156
BJ-002-08-102	2011-11-23	23.4038	14518.9	0.79244	9.67516	2.72561	4.099	5.26097	0.28763	4.49988	0.855332	1629.68	64.8003	1654.1	42.9683	1685.25	50.314	1685.25	50.314	96.7021	1581.43	21.1157
BJ-002-08-66	2011-11-23	108.713	20079.9	0.917982	9.67485	1.0692	4.3061	2.61571	0.302153	2.3872	0.912641	1701.98	35.709	1694.53	21.5573	1685.31	19.7335	1685.31	19.7335	100.989	1582.24	20.1386
BJ-002-08-80	2011-11-23	294.901	91786.1	1.08596	9.61873	0.597522	4.3049	1.31592	0.300317	1.17243	0.890965	1692.88	17.4557	1694.3	10.8433	1696.04	11.0121	1696.04	11.0121	99.8136	1584.28	17.5373
BJ-002-08-23	2011-11-23	149.797	179515	2.08853	9.54839	0.691017	4.47267	1.72268	0.309738	1.57801	0.916021	1739.42	24.0569	1725.91	14.2965	1709.56	12.7138	1709.56	12.7138	101.747	1584.78	15.9067
BJ-002-08-106	2011-11-23	176.809	11801.3	1.4686	9.50569	3.62207	3.98778	5.22022	0.274925	3.75916	0.720116	1565.75	52.2574	1631.71	42.4028	1717.8	66.5955	1717.8	66.5955	91.1487	1586.45	21.7077
BJ-002-08-104	2011-11-23	80.062	25330.8	1.34992	9.47396	2.86268	4.35196	3.58575	0.299031	2.15931	0.602193	1686.5	32.043	1703.27	29.6145	1723.94	52.5883	1723.94	52.5883	97.8281	1588.12	19.2747
BJ-002-08-98	2011-11-23	89.5952	81826.2	1.77753	9.44568	1.025	4.55948	2.09761	0.312354	1.83012	0.872479	1752.28	28.0799	1741.89	17.4694	1729.43	18.8126	1729.43	18.8126	101.321	1592.56	16.0317
BJ-002-08-126	2011-11-23	202.463	105901	2.36624	9.44426	0.405472	4.56725	1.31511	0.31284	1.25104	0.951283	1754.66	19.2177	1743.31	10.9553	1729.71	7.4422	1729.71	7.4422	101.443	1595.91	15.7888
BJ-002-08-41	2011-11-23	142.359	143371	1.98301	9.39647	0.391423	4.61055	2.19039	0.314207	2.15513	0.983904	1761.38	33.2161	1751.18	18.2787	1739.01	7.1742	1739.01	7.1742	101.286	1597.07	15.0781
BJ-002-08-123	2011-11-23	313.023	371226	3.58232	9.35852	0.2394	4.62261	1.41238	0.313757	1.39194	0.98553	1759.17	21.4298	1753.36	11.791	1746.43	4.38491	1746.43	4.38491	100.729	1598.47	17.086
BJ-002-08-44	2011-11-23	226.021	179986	1.39041	9.2655	0.470309	4.78465	2.10802	0.321527	2.05489	0.974795	1797.18	32.2294	1782.21	17.7061	1764.7	8.59469	1764.7	8.59469	101.841	1599.71	21.0779
BJ-002-08-117	2011-11-23	166.892	116236	1.45652	9.24767	0.479127	4.62163	1.42695	0.309975	1.3441	0.941944	1740.58	20.5029	1753.18	11.9122	1768.22	8.752	1768.22	8.752	98.4369	1599.99	41.3005
BJ-002-08-9	2011-11-23	269.893	15899.7	3.53746	9.13958	0.469372	4.70177	1.79365	0.311664	1.73114	0.965153	1748.89	26.5166	1767.56	15.0193	1789.67	8.55119	1789.67	8.55119	97.7215	1600.37	14.6231
BJ-002-08-36	2011-11-23	157.317	98269	2.83695	9.1362	0.584049	4.95397	0.958802	0.328259	0.760387	0.793059	1829.94	12.114	1811.5	8.10055	1790.34	10.6377	1790.34	10.6377	102.212	1600.82	40.093
BJ-002-08-27	2011-11-23	259.077	30818.4	3.21838	9.08085	0.624971	4.66143	4.30986	0.307004	4.26431	0.98943	1725.95	64.5726	1760.35	36.0469	1801.4	11.3695	1801.4	11.3695	95.8114	1601.08	8.64386
BJ-002-08-108	2011-11-23	458.121	33857.6	1.74112	9.07616	0.290164	4.85897	2.43123	0.319849	2.41385	0.992852	1788.99	37.7098	1795.17	20.4756	1802.34	5.27802	1802.34	5.27802	99.2593	1602.15	19.0249
BJ-002-08-63	2011-11-23	348.416	271399	2.55881	8.80725	0.246786	5.39231	1.27107	0.344441	1.24688	0.980971	1908	20.5929	1883.63	10.8876	1856.86	4.45742	1856.86	4.45742	102.754	1604.95	15.3924
BJ-002-08-130	2011-11-23	98.69	157562	0.986069	3.82056	0.194813	24.5179	0.96256	0.679375	0.94264	0.979305	3341.96	24.5826	3289.21	9.39092	3257.21	3.06699	3257.21	3.06699	102.602	1605.49	23.0766
																					1606.03	22.6947
Sample BJ-MFD-08: Blackjack Formation quartzite, Arizona (UTM Zone 12, E 525303, N 3725167, NAD27) - sample originally from Doe et al. (2012), reanalyzed Nov 2011																					1607.15	20.8729
BJ-MFD-08-110	2011-11-23	47.9494	37415.9	1.00889	10.9375	3.19461	3.26739	3.68339	0.25919	1.83353	0.497784	1485.69	24.3296	1473.32	28.6438	1455.53	60.779	1455.53	60.779	102.072	1607.53	31.278
BJ-MFD-08-30	2011-11-23	105.12	138474	1.37533	10.8375	1.11838	3.31726	2.44527	0.26074	2.17453	0.889279	1493.63	28.9913	1485.12	19.08	1472.97	21.2233	1472.97	21.2233	101.402	1609.13	18.6353
BJ-MFD-08-43	2011-11-23	82.1926	56424.7	1.2613	10.8336	1.14118	3.37369	2.6939	0.265079	2.44024	0.905841	1515.78	32.9619	1498.31	21.1023	1473.67	21.654	1473.67	21.654	102.857	1609.3	13.8144
BJ-MFD-08-72	2011-11-23	55.9955	24445.3	0.727401	10.8248	1.99773	3.35958	2.34927	0.263757	1.23619	0.526201	1509.04	16.632	1495.03	18.3845	1475.2	37.9017	1475.2	37.9017	102.294	1609.97	14.1699
BJ-MFD-08-1	2011-11-23	152.29	198511	1.25793	10.8114	0.700494	3.33563	1.30838	0.261552	1.10507	0.844605	1497.78	14.7693	1489.43	10.2213	1477.55	13.2847	1477.55	13.2847	101.369	1610.97	22.027
BJ-MFD-08-31	2011-11-23	487.125	6282.73	1.7995	10.7926	0.583869	3.10648	2.44782	0.24316	2.37716	0.971136	1403.11	29.9741	1434.3	18.8043	1480.85	11.068	1480.85	11.068	94.7498	1612	18.6047
BJ-MFD-08-66	2011-11-23	128.838	75106.6	1.34204	10.7738	0.754753	3.32046	1.58363	0.259456	1.39221	0.879123	1487.06	18.4886	1485.87	12.3587	1484.16	14.3011	1484.16	14.3011	100.195	1613.78	13.7783
BJ-MFD-08-75	2011-11-23	185.629	4467.91	1.40899	10.7716	0.752408	3.01576	1.92341	0.2356	1.77014	0.920312	1363.78	21.7583	1411.61	14.6677	1484.54	14.2559	1484.54	14.2559	91.8653	1614.43	30.918
BJ-MFD-08-128	2011-11-23	173.802	90929	1.47311	10.7667	0.675461	3.38784	1.30427	0.264547	1.11573	0.85545	1513.07	15.0469	1501.59	10.2255	1485.41	12.7965	1485.41	12.7965	101.862	1614.65	12.4165
BJ-MFD-08-91	2011-11-23	146.423	21643.5	0.91484	10.7545	1.11446	3.29948	2.43088	0.257356	2.16037	0.888716	1476.3	28.5052	1480.93	18.9441	1487.56	21.1076	1487.56	21.1076	99.2433	1615.36	33.6042
BJ-MFD-08-121	2011-11-23	196.067	30953	1.38584	10.7345	0.645533	3.22018	1.02224	0.250703	0.792624	0.775383	1442.1	10.2422	1462.03	7.92025	1491.08	12.2202	1491.08	12.2202	96.7154	1616.36	60.3236
BJ-MFD-08-52	2011-11-23	175.899	125673	1.99461	10.709	0.499536	3.42026	0.960037	0.265647	0.819838	0.853965	1518.67	11.0928	1509.06	7.54288	1495.58	9.45073	1495.58	9.45073	101.544	1617.41	19.6452
BJ-MFD-08-78	2011-11-23	98.6577	190607	1.50261	10.7057	1.0598	3.46452	1.70907	0.269001	1.3408	0.784519	1535.73	18.3221	1519.18	13.4674	1496.17	20.0493	1496.17	20.0493	102.644	1619.63	34.844
BJ-MFD-08-86	2011-11-23	241.253	4193.69	1.03132	10.6991	0.539497	2.98361	2.52434	0.231519	2.46602	0.976895	1342.46	29.8857	1403.45	19.1997	1497.33	10.2044	1497.33	10.2044	89.6569	1620.04	16.7366
BJ-MFD-08-99	2011-11-23	90.7958	61205.8	1.16835	10.6987	1.19	3.4673	2.12059	0.269044	1.75522	0.827704	1535.95	23.9882	1519.81	16.7137	1497.39	22.5073	1497.39	22.5073	102.575	1620.61	11.1347
BJ-MFD-08-112	2011-11-23	178.716	5403.24	1.06545	10.6939	0.662592	3.00628	3.01476	0.233165	2.94104	0.975549	1351.07	35.8482	1409.21	22.9744	1498.25	12.5312	1498.25	12.5312	90.1765	1620.73	22.8246
BJ-MFD-08-13	2011-11-23	218.576	133670	1.88514	10.668	0.636117	3.44059	1.03595	0.266204	0.817644	0.789272	1521.51	11.0814	1513.72	8.15021	1502.83	12.0231	1502.83	12.0231	101.243	1620.85	11.259
BJ-MFD-08-32	2011-11-23	250.564	4880.06	1.07607	10.6673	0.488474	3.02913	3.0535	0.234353	3.01417	0.987122	1357.27	36.8912	1414.99	23.3136	1502.96	9.23234	1502.96	9.23234	90.307	1620.87	18.8715
BJ-MFD-08-12	2011-11-23	264.631	11922.9	1.1302	10.659	0.73098	3.30451	3.71005	0.25546	3.63733	0.980398	1466.57	47.7121	1482.12	28.9275	1504.42	13.8132	1504.42	13.8132	97.4842	1621.9	12.9494
BJ-MFD-08-17	2011-11-23	186.699	21442.4	0.915235	10.6324	0.776384	3.31825	1.47058	0.255882	1.24894	0.84928	1468.74	16.404	1485.35	11.4746	1509.14	14.6605	1509.14	14.6605	97.3229	1622.96	33.5878
BJ-MFD-08-98	2011-11-23	228.317	12560.9	1.722	10.6126	0.769455	3.15041	1.67099	0.242487	1.48329	0.887671	1399.61	18.6614	1445.1	12.8797	1512.66	14.5228	1512.66	14.5228	92.5264	1623.65	64.3938
BJ-MFD-08-115	2011-11-23	291.523	4455.73	1.58385	10.5879	1.0816	3.01654	1.87622	0.231643	1.53309	0.817113	1343.11	18.5875	1411.81	14.3087	1517.05	20.4033	1517.05	20.4033	88.5338	1624.72	52.4661
BJ-MFD-08-107	2011-11-23	73.292	33400.5	0.91939	10.528	1.28693	3.57742	1.7623	0.273158	1.20396	0.683173	1556.81	16.6518	1544.53	13.9858	1527.75	24.2429	1527.75	24.2429	101.902	1624.76	14.9963
BJ-MFD-08-41	2011-11-23	133.135	58587.9	1.42277	10.5271	0.368206	3.53304	2.56339	0.269746	2.53681	0.98963	1539.51	34.7414	1534.64	20.289	1527.92	6.93622	1527.92	6.93622	100.758	1625.13	49.8051
BJ-MFD-08-102	2011-11-23	37.7625	20252.7	1.15656	10.5202	2.22604	3.70055	2.77269	0.282351	1.65306	0.596191	1603.19	23.4633	1571.49	22.1676	1529.15	41.9303	1529.15	41.9303	104.842	1626.72	12.1854
BJ-MFD-08-59	2011-11-23	64.912	82829.2	1.48871	10.5083	1.31419	3.63502	1.95482	0.277038	1.44715	0.740298	1576.43	20.2381	1557.23	15.5678	1531.27	24.7449	1531.27	24.7449	102.949	1629.68	19.6215
BJ-MFD-08-50	2011-11-23	37.9165	19493.6	1.35084	10.4766	1.48017	3.6368	2.23644	0.276337	1.67653	0.749643	1572.89	23.3995	1557.62	17.8128	1536.96	27.8498	1536.96	27.8498	102.337	1630.07	22.8248
BJ-MFD-08-61	2011-11-23	120.585	68102.4	1.16869	10.408	1.1376	3.64796	1.77327	0.27537	1.36028	0.767102	1568	18.9334	1560.06	14.1326	1549.32	21.3701	1549.32	21.3701	101.206	1631.7	7.05499
BJ-MFD-08-15	2011-11-23	147.544	98957.3	2.03948	10.3645	0.718576	3.70718	1.55108	0.278671	1.37459	0.886214	1584.67	19.3119	1572.92	12.4042	1557.18	13.4844	1557.18	13.4844	101.765	1632.95	19.9344
BJ-MFD-08-36	2011-11-23	37.6036	19968.5	1.17558	10.3622	2.87084	3.6872	3.11457	0.277108	1.20782	0.387796	1576.78	16.8944	1568.6	24.8827	1557.59	53.8771	1557.59	53.8771	101.232	1633.26	22.5553
BJ-MFD-08-57	2011-11-23	112.493	64287.9	0.813643	10.353	0.795242	3.71984	1.43623	0.279312	1.19597	0.832714	1587.89	16.8326	1575.65	11.4939	1559.26	14.9174	1559.26	14.9174	101.836	1634.15	17.0385
BJ-MFD-08-19	2011-11-23	180.922	131785	1.02284	10.351	0.438139	3.62228	0.874153	0.271932	0.756424	0.865322	1550.6	10.4251	1554.44	6.95584	1559.64	8.21915	1559.64	8.21915	99.4209	1635.49	19.8856
BJ-MFD-08-7	2011-11-23	82.0473	94679.8	1.03666	10.3372	1.29723	3.63623	2.82468	0.272618	2.50919	0.888307	1554.08	34.6507	1557.5	22.4987	1562.12	24.3265	1562.12	24.3265	99.4848	1635.93	19.6259
BJ-MFD-08-85	2011-11-23	91.1871	91828.9	1.88464	10.3315	1.26828	3.84113	1.93955	0.28782	1.46742	0.756579	1630.63	21.1418	1601.41	15.6271	1563.17	23.7802	1563.17	23.7802	104.316	1637.43	19.5918
BJ-MFD-08-39	2011-11-23	161.144	19926.2	1.01462	10.3279	0.854031	3.58925	1.50171	0.268853	1.23522	0.822542	1534.97	16.872	1547.16	11.9261	1563.82	16.0108	1563.82	16.0108	98.1556	1638.54	23.0598
BJ-MFD-08-20	2011-11-23	154.696	119773	1.44647	10.3183	0.77219	3.80696	1.55372	0.284896	1.34825	0.867754	1615.97	19.2712	1594.22	12.4949	1565.56	14.473	1565.56	14.473	103.22	1638.94	20.9062
BJ-MFD-08-117	2011-11-23	101.897	95813.9	1.01303	10.3165	0.911132	3.70049	1.3849	0.276879	1.04297	0.753101	1575.62	14.5791	1571.47	11.0709	1565.89	17.0768	1565.89	17.0768	100.622	1641.98	10.5816
BJ-MFD-08-88	2011-11-23	67.3695	35258.1	1.25642	10.2843	1.26684	3.82861	1.79062	0.285572	1.26548	0.706727	1619.36	18.1215	1598.78	14.4173	1571.74	23.7266	1571.74	23.7266	103.03	1642.3	24.1187
BJ-MFD-08-122	2011-11-23	106.721	167396	1.52585	10.2827	1.23913	3.79044	2.18341	0.282681	1.79773	0.823359	1604.85	25.54	1590.72	17.5437	1572.03	23.2066	1572.03	23.2066	102.087	1652.86	8.35088
BJ-MFD-08-89	2011-11-23	35.4716	28187.1	1.4698	10.2752	3.25692	3.7605	3.55751	0.280243	1.4312	0.402304	1592.58	20.1959	1584.35	28.542	1573.4	60.9986	1573.4	60.9986	101.219	1656.96	6.32956
BJ-MFD-08-67	2011-11-23	207.903	116787	1.37155	10.268	0.396551	3.77765	1.08587	0.281323	1.01087	0.930932	1598.02	14.3074	1588.01	8.71818	1574.72	7.42272	1574.72	7.42272	101.48	1661.42	11.9201
BJ-MFD-08-74	2011-11-23	100.438	71068.8	1.21769	10.2597	1.01496	3.78772	1.71176	0.281845	1.3784	0.805252	1600.65	19.5375	1590.15	13.7514	1576.23	18.9973	1576.23	18.9973	101.549	1665.5	13.1457
BJ-MFD-08-129	2011-11-23	118.411	33090.6	1.39148	10.2464	1.03445	3.6573	2.39965	0.271788	2.16523	0.902312	1549.87	29.8291	1562.1	19.1362	1578.66	19.3561	1578.66	19.3561	98.1763	1668.76	13.7912
BJ-MFD-08-118	2011-11-23	92.5315	91745.7	1.42792	10.2367	1.3051	3.82303	1.87617	0.283835	1.34785	0.718408	1610.65	19.2096	1597.61	15.1015	1580.42	24.4156	1580.42	24.4156	101.913	1695.67	9.68085
BJ-MFD-08-48	2011-11-23	103.297	52284.9	1.64916	10.2312	1.12888	3.81229	1.6797	0.282887	1.2438	0.740486	1605.88	17.6805	1595.34	13.5121	1581.43	21.1157	1581.43	21.1157	101.546	1711.08	5.8254
BJ-MFD-08-80	2011-11-23	104.102	90645.8	0.925845	10.2268	1.07677	3.81119	2.49362	0.282682	2.24916	0.901965	1604.85	31.9536	1595.11	20.0597	1582.24	20.1386	1582.24	20.1386	101.429	1718.85	9.98891
BJ-MFD-08-82	2011-11-23	214.152	3873.95	1.2252	10.2156	0.93795	3.42504	2.79057	0.253764	2.62822	0.941821	1457.86	34.2924	1510.16	21.9351	1584.28	17.5373	1584.28	17.5373	92.02	1720.36	10.2259
BJ-MFD-08-55	2011-11-23	163.134	40131.3	1.10691	10.2129	0.850804	3.75248	1.22239	0.277949	0.877702	0.718023	1581.02	12.306	1582.64	9.80054	1584.78	15.9067	1584.78	15.9067	99.7628	1729.94	8.79896
BJ-MFD-08-126	2011-11-23	100.085	68008.8	1.20556	10.2038	1.16129	3.78165	1.53563	0.279859	1.00478	0.654308	1590.65	14.1633	1588.86	12.3322	1586.45	21.7077	1586.45	21.7077	100.265	1730.21	27.4256
BJ-MFD-08-71	2011-11-23	62.7785	37464.3	1.12854	10.1946	1.03137	3.88965	1.37263	0.287595	0.90575	0.659865	1629.5	13.0415	1611.53	11.0875	1588.12	19.2747	1588.12	19.2747	102.605	1730.48	9.66449
BJ-MFD-08-83	2011-11-23	100.231	83052.3	1.29719	10.1705	0.858273	3.86888	1.18057	0.285381	0.810624	0.686638	1618.41	11.602	1607.21	9.52556	1592.56	16.0317	1592.56	16.0317	101.623	1743.35	9.49325
BJ-MFD-08-33	2011-11-23	96.9136	49446	1.59134	10.1522	0.84564	3.8541	1.08545	0.283781	0.680504	0.626935	1610.37	9.69709	1604.13	8.75111	1595.91	15.7888	1595.91	15.7888	100.906	1764.8	8.23834
BJ-MFD-08-70	2011-11-23	144.473	18193.5	1.58952	10.1459	0.807699	3.69929	1.19487	0.272213	0.880528	0.736925	1552.03	12.1454	1571.22	9.55099	1597.07	15.0781	1597.07	15.0781	97.1797	1785.67	13.2648
BJ-MFD-08-97	2011-11-23	73.0934	112190	1.56939	10.1383	0.915415	3.75225	3.58425	0.275904	3.46538	0.966836	1570.7	48.3078	1582.6	28.7433	1598.47	17.086	1598.47	17.086	98.2628	1786.12	23.2467
BJ-MFD-08-45	2011-11-23	58.095	51014	1.35092	10.1316	1.12955	3.93076	1.32192	0.288836	0.686719	0.519486	1635.71	9.92091	1620.04	10.7007	1599.71	21.0779	1599.71	21.0779	102.25	1799.48	8.62335
BJ-MFD-08-127	2011-11-23	47.4797	37983.5	1.43724	10.1301	2.21315	3.99184	2.36661	0.293281	0.838335	0.354235	1657.91	12.2554	1632.54	19.2185	1599.99	41.3005	1599.99	41.3005	103.62	1800.35	6.28263
BJ-MFD-08-22	2011-11-23	207.742	8631	1.11011	10.128	0.78366	2.88327	12.3569	0.211791	12.332	0.997987	1238.35	138.963	1377.55	93.422	1600.37	14.6231	1600.37	14.6231	77.3795	1801.79	9.62485
BJ-MFD-08-105	2011-11-23	89.373	25844.7	1.72325	10.1255	2.14869	3.7316	2.476	0.274039	1.23032	0.4969	1561.27	17.0596	1578.17	19.83	1600.82	40.093	1600.82	40.093	97.5293	1809.25	12.1011
BJ-MFD-08-5	2011-11-23	319.202	97746.7	38.3069	10.1242	0.463277	3.81077	1.1494	0.279815	1.0519	0.915173	1590.43	14.8258	1595.02	9.24509	1601.08	8.64386	1601.08	8.64386	99.3351	2471.74	13.1068
BJ-MFD-08-104	2011-11-23	118.43	105658	1.17286	10.1184	1.01987	3.92594	1.78637	0.288106	1.46663	0.821009	1632.06	21.1466	1619.04	14.4573	1602.15	19.0249	1602.15	19.0249	101.867	1712	8
BJ-MFD-08-84	2011-11-23	84.7189	60454.2	2.10222	10.1032	0.825381	3.98622	2.05069	0.292091	1.87725	0.915425	1651.97	27.357	1631.39	16.6479	1604.95	15.3924	1604.95	15.3924	102.929	1554	9
BJ-MFD-08-56	2011-11-23	58.65	44284.8	0.82835	10.1002	1.23757	3.95443	2.14068	0.289677	1.74669	0.815951	1639.91	25.2912	1624.9	17.3506	1605.49	23.0766	1605.49	23.0766	102.144	1572	6
BJ-MFD-08-47	2011-11-23	71.6674	70488.7	1.41414	10.0973	1.21718	3.97063	2.02642	0.29078	1.62014	0.799509	1645.42	23.528	1628.21	16.4379	1606.03	22.6947	1606.03	22.6947	102.453	1640	7
BJ-MFD-08-120	2011-11-23	84.1345	78564.5	1.22446	10.0912	1.11964	3.82661	1.81616	0.280064	1.42998	0.787363	1591.69	20.1686	1598.36	14.6213	1607.15	20.8729	1607.15	20.8729	99.0376	1722	21
BJ-MFD-08-4	2011-11-23	69.7776	14811.5	1.63019	10.0892	1.67776	3.28076	4.41479	0.240066	4.08357	0.924974	1387.04	50.9627	1476.5	34.3684	1607.53	31.278	1607.53	31.278	86.2837	1487	6
BJ-MFD-08-29	2011-11-23	62.1611	34218.9	1.50127	10.0805	0.999895	3.8683	2.11431	0.282815	1.86293	0.881107	1605.52	26.4763	1607.09	17.0601	1609.13	18.6353	1609.13	18.6353	99.7758	1478	5
BJ-MFD-08-130	2011-11-23	70.9101	56844.4	1.1072	10.0796	0.741274	3.96155	1.58784	0.289606	1.40419	0.88434	1639.56	20.3281	1626.36	12.8739	1609.3	13.8144	1609.3	13.8144	101.88	1779	10
BJ-MFD-08-62	2011-11-23	167.525	82667.4	1.56224	10.076	0.760411	3.85023	1.71587	0.281368	1.53817	0.89644	1598.25	21.7734	1603.32	13.8314	1609.97	14.1699	1609.97	14.1699	99.2722	1548	6
BJ-MFD-08-81	2011-11-23	66.3826	104951	0.727655	10.0706	1.18213	4.00043	1.83534	0.292188	1.40393	0.764946	1652.45	20.4646	1634.28	14.91	1610.97	22.027	1610.97	22.027	102.575	1561	10
BJ-MFD-08-24	2011-11-23	80.9132	76137.4	1.27728	10.0651	0.998618	3.85755	1.35148	0.281596	0.91064	0.673809	1599.4	12.8986	1604.85	10.8981	1612	18.6047	1612	18.6047	99.2183	1581	9
BJ-MFD-08-124	2011-11-23	85.8348	49167.4	1.92306	10.0554	0.739764	3.97165	1.40399	0.289648	1.19329	0.849927	1639.77	17.2769	1628.42	11.389	1613.78	13.7783	1613.78	13.7783	101.61	1642	9
BJ-MFD-08-21	2011-11-23	52.2748	87994.1	0.771686	10.0519	1.65993	3.91386	2.51461	0.285334	1.88889	0.751165	1618.17	27.0312	1616.55	20.3396	1614.43	30.918	1614.43	30.918	100.232	1649	22
BJ-MFD-08-11	2011-11-23	127.077	139742	1.3555	10.0507	0.666733	3.9585	2.08368	0.288554	1.97413	0.947425	1634.3	28.4985	1625.73	16.892	1614.65	12.4165	1614.65	12.4165	101.217	1718	10
BJ-MFD-08-60	2011-11-23	125.108	26931.8	1.12286	10.0469	1.80434	3.96977	3.64515	0.289265	3.16725	0.868895	1637.86	45.8101	1628.04	29.5731	1615.36	33.6042	1615.36	33.6042	101.393	1621	5
BJ-MFD-08-8	2011-11-23	28.6313	33670.6	0.835041	10.0415	3.23894	3.88241	4.22716	0.282747	2.71627	0.642576	1605.18	38.5969	1610.03	34.1436	1616.36	60.3236	1616.36	60.3236	99.3081	1657	12
BJ-MFD-08-53	2011-11-23	83.9934	55432.2	0.782001	10.0358	1.0552	3.89793	2.3004	0.283718	2.04412	0.888591	1610.06	29.1235	1613.25	18.5911	1617.41	19.6452	1617.41	19.6452	99.5453	1555	10
BJ-MFD-08-114	2011-11-23	50.7153	35390.4	1.58296	10.0239	1.87193	3.87195	2.85439	0.28149	2.15486	0.75493	1598.86	30.5133	1607.85	23.038	1619.63	34.844	1619.63	34.844	98.7176	1520	10
BJ-MFD-08-79	2011-11-23	87.2495	41075.3	0.935554	10.0217	0.899294	3.97952	2.34809	0.289248	2.16906	0.923753	1637.77	31.3708	1630.03	19.0563	1620.04	16.7366	1620.04	16.7366	101.094	1539	7
BJ-MFD-08-27	2011-11-23	128.663	95227.1	1.25515	10.0186	0.598373	3.92439	1.91715	0.285152	1.82137	0.950044	1617.26	26.052	1618.72	15.5145	1620.61	11.1347	1620.61	11.1347	99.7928	1652	8
BJ-MFD-08-23	2011-11-23	63.3101	57466.9	1.28087	10.0179	1.22648	3.90119	1.67098	0.283449	1.13487	0.679165	1608.71	16.157	1613.93	13.5059	1620.73	22.8246	1620.73	22.8246	99.2582	1577	9
BJ-MFD-08-42	2011-11-23	160.905	224033	0.78782	10.0173	0.605069	3.93632	1.40236	0.285983	1.26512	0.90213	1621.42	18.1365	1621.18	11.3552	1620.85	11.259	1620.85	11.259	100.036	1897	7
BJ-MFD-08-113	2011-11-23	90.7343	111146	0.968539	10.0172	1.0141	3.88747	1.41956	0.28243	0.993354	0.699761	1603.59	14.1026	1611.08	11.4653	1620.87	18.8715	1620.87	18.8715	98.9336	1617	7
BJ-MFD-08-51	2011-11-23	111.593	100167	0.888321	10.0117	0.695994	3.95695	1.11987	0.28732	0.877322	0.783416	1628.12	12.6228	1625.42	9.07724	1621.9	12.9494	1621.9	12.9494	100.384	1556	9
BJ-MFD-08-25	2011-11-23	57.1401	78245.8	1.02591	10.0059	1.80523	4.02506	2.22422	0.292098	1.29934	0.584179	1652.01	18.9355	1639.27	18.0919	1622.96	33.5878	1622.96	33.5878	101.79	1628	7
BJ-MFD-08-65	2011-11-23	103.03	14843.8	0.994509	10.0022	3.46059	4.03626	5.45876	0.292803	4.22166	0.773373	1655.52	61.6392	1641.53	44.45	1623.65	64.3938	1623.65	64.3938	101.963	1575	8
BJ-MFD-08-37	2011-11-23	46.8614	36233.2	1.25287	9.99647	2.82031	4.05952	3.44783	0.29432	1.98328	0.575226	1663.08	29.0726	1646.21	28.0965	1624.72	52.4661	1624.72	52.4661	102.361	1575	9
BJ-MFD-08-3	2011-11-23	153.22	138778	1.047	9.99626	0.806287	3.96411	1.2858	0.287397	1.00158	0.778961	1628.51	14.4137	1626.88	10.4261	1624.76	14.9963	1624.76	14.9963	100.231	1485	16
BJ-MFD-08-34	2011-11-23	63.4218	57814.6	1.47442	9.99426	2.67739	4.06908	3.10888	0.294948	1.58011	0.508256	1666.21	23.2007	1648.13	25.3449	1625.13	49.8051	1625.13	49.8051	102.528	1499	10
BJ-MFD-08-94	2011-11-23	104.269	77383.8	0.655087	9.98572	0.655343	4.0579	1.52545	0.293886	1.3775	0.903016	1660.92	20.1695	1645.89	12.4274	1626.72	12.1854	1626.72	12.1854	102.102	1649	10
BJ-MFD-08-77	2011-11-23	85.6496	39267.1	0.693042	9.96984	1.0556	4.09984	1.96887	0.296451	1.66198	0.844127	1673.69	24.4987	1654.27	16.0729	1629.68	19.6215	1629.68	19.6215	102.7	1508	6
BJ-MFD-08-92	2011-11-23	71.1954	55226.3	1.01941	9.96773	1.22796	4.08081	2.0193	0.295013	1.60302	0.793849	1666.53	23.541	1650.48	16.4695	1630.07	22.8248	1630.07	22.8248	102.237	1704	11
BJ-MFD-08-116	2011-11-23	156.307	122793	0.963134	9.959	0.379619	3.9129	0.671256	0.282627	0.5536	0.824724	1604.58	7.86371	1616.35	5.42854	1631.7	7.05499	1631.7	7.05499	98.3374	1540	6
BJ-MFD-08-101	2011-11-23	101.62	117708	1.32577	9.9523	1.07288	4.08308	1.88279	0.29472	1.5472	0.821759	1665.08	22.704	1650.93	15.3577	1632.95	19.9344	1632.95	19.9344	101.967	1576	8
BJ-MFD-08-68	2011-11-23	115.634	53526.7	1.07741	9.95067	1.21397	4.02648	2.43945	0.290587	2.11594	0.867385	1644.46	30.7124	1639.56	19.8444	1633.26	22.5553	1633.26	22.5553	100.686	1837	11
BJ-MFD-08-46	2011-11-23	83.7209	71365.2	1.54492	9.94588	0.917182	4.10605	1.61767	0.296187	1.33253	0.823733	1672.37	19.6288	1655.51	13.2094	1634.15	17.0385	1634.15	17.0385	102.339	1631	10
BJ-MFD-08-96	2011-11-23	104.934	64301.8	0.792225	9.93872	1.0706	4.0531	2.80176	0.292157	2.58915	0.924114	1652.3	37.7382	1644.92	22.8225	1635.49	19.8856	1635.49	19.8856	101.028	1499	9
BJ-MFD-08-63	2011-11-23	66.9152	41381.3	0.923813	9.93636	1.05668	3.98958	2.20416	0.287511	1.93436	0.877594	1629.08	27.8459	1632.08	17.897	1635.93	19.6259	1635.93	19.6259	99.5809	1649	7
BJ-MFD-08-10	2011-11-23	130.866	85908.6	0.944981	9.92837	1.05505	4.0619	1.31899	0.292487	0.791582	0.600144	1653.94	11.5477	1646.69	10.7474	1637.43	19.5918	1637.43	19.5918	101.009	1711	8
BJ-MFD-08-12R	2011-11-23	66.5458	65515.3	1.40768	9.92244	1.24196	4.09055	1.54477	0.294374	0.918619	0.594664	1663.35	13.4677	1652.42	12.6047	1638.54	23.0598	1638.54	23.0598	101.514	1529	6
BJ-MFD-08-108	2011-11-23	68.4128	60614.7	0.688638	9.92031	1.12604	3.95899	2.46803	0.284844	2.19618	0.889851	1615.71	31.3868	1625.83	20.0091	1638.94	20.9062	1638.94	20.9062	98.5832	1590	5
BJ-MFD-08-100	2011-11-23	190.04	32107.4	1.00546	9.90403	0.570133	4.0412	2.78433	0.290283	2.72533	0.978811	1642.94	39.5256	1642.53	22.6672	1641.98	10.5816	1641.98	10.5816	100.058	1791	8
BJ-MFD-08-38	2011-11-23	91.1797	44014.6	0.930865	9.90232	1.2997	4.21338	3.18082	0.302598	2.90318	0.912712	1704.18	43.4764	1676.63	26.1082	1642.3	24.1187	1642.3	24.1187	103.768	1554	9
BJ-MFD-08-125	2011-11-23	226.711	10304.1	1.49028	9.84613	0.450573	3.83972	2.45023	0.274198	2.40845	0.982947	1562.08	33.4108	1601.11	19.7411	1652.86	8.35088	1652.86	8.35088	94.5076	1562	11
BJ-MFD-08-119	2011-11-23	251.913	15105.1	5.61801	9.82434	0.341785	3.62647	5.21555	0.258396	5.20434	0.99785	1481.63	68.8921	1555.36	41.5343	1656.96	6.32956	1656.96	6.32956	89.4185	1630	12
BJ-MFD-08-95	2011-11-23	126.795	233121	1.72694	9.80072	0.643941	4.18178	1.34024	0.297248	1.17541	0.877013	1677.65	17.3621	1670.46	10.9828	1661.42	11.9201	1661.42	11.9201	100.977	1610	9
BJ-MFD-08-109	2011-11-23	187.507	43093.8	2.59733	9.77915	0.710507	3.8327	2.78962	0.271834	2.69762	0.967021	1550.11	37.1687	1599.64	22.4678	1665.5	13.1457	1665.5	13.1457	93.0718	1778	7
BJ-MFD-08-64	2011-11-23	90.2663	85956	1.51773	9.76189	0.745702	4.23435	1.38615	0.299792	1.16848	0.842966	1690.28	17.3734	1680.71	11.3863	1668.76	13.7912	1668.76	13.7912	101.289	1718	20
BJ-MFD-08-14	2011-11-23	127.603	154775	1.10103	9.62068	0.525278	4.33305	1.55353	0.302342	1.46203	0.941103	1702.91	21.8801	1699.67	12.8171	1695.67	9.68085	1695.67	9.68085	100.427	1461	13
BJ-MFD-08-73	2011-11-23	167.157	331373	2.6467	9.54049	0.316641	4.43354	1.49987	0.306775	1.46607	0.977462	1724.82	22.1867	1718.63	12.4272	1711.08	5.8254	1711.08	5.8254	100.803	1696	10
BJ-MFD-08-6	2011-11-23	266.365	31156.4	5.74187	9.50027	0.543479	4.39923	1.46047	0.303118	1.35558	0.928182	1706.75	20.327	1712.2	12.0834	1718.85	9.98891	1718.85	9.98891	99.2962	1575	12
BJ-MFD-08-26	2011-11-23	147.055	91606.7	1.67472	9.49246	0.556477	4.43396	1.26478	0.305259	1.13578	0.898008	1717.34	17.1233	1718.71	10.4794	1720.36	10.2259	1720.36	10.2259	99.8244	1585	9
BJ-MFD-08-87	2011-11-23	134.384	20085.7	1.39819	9.44305	0.479406	4.50004	2.37114	0.308196	2.32217	0.979348	1731.82	35.2672	1730.98	19.7012	1729.94	8.79896	1729.94	8.79896	100.109	1545	18
[truncated: 1,038 more rows]

## Sheet: EC Meta
Dunning and Indares 2010											Age (Ma)	±1sig
[truncated: 52 more rows]

## Sheet: MC monazite
Medaris et al., 2021
[truncated: 48 more rows]

[truncated: 5 more sheets: SW monazite, Garnet Ages NM & NVF, MC Ar-Ar, SW Ar-Ar, U-Th He Hematite MC]
